# Supplementary material for: Unveiling senescence-associated secretory phenotype in epidermal aging: insights from reversibly immortalized keratinocytes
Source: Aging (Albany NY). 2024 Sep 23;16(18):12651–66. doi: 10.18632/aging.206117 (PMC11466489; doi:10.18632/aging.206117)
Supplement: Supplementary Table 1 [file aging-16-206117-s001.xlsx]

## Sheet: Supplementary Table 1
Supplementary Table 1. DEGs of reversibly immortalized keratinocytes with PBS or Dox treatment.
	Dox			PBS			Dox	PBS
gene_id	SV40T_Dox1	SV40T_Dox2	SV40T_Dox3	SV40T_1	SV40T_2	SV40T_3			log2FoldChange	pvalue	padj	gene_name	gene_chr	gene_start	gene_end	gene_strand	gene_length	gene_biotype	gene_description	tf_family
ENSG00000044574	15327.9	14654	15297.4	72367.2	69226.2	68683.8	15093.1	70092.4	-2.2154	0	0	HSPA5	9	125234853	125241330	-	3908	protein_coding	heat shock protein family A (Hsp70) member 5 [Source:HGNC Symbol;Acc:HGNC:5238]	-
ENSG00000106211	43571.1	47116.9	39059.1	4182.99	3680.27	3915.55	43249	3926.27	3.46141	0	0	HSPB1	7	76302544	76304295	+	1634	protein_coding	heat shock protein family B (small) member 1 [Source:HGNC Symbol;Acc:HGNC:5246]	-
ENSG00000265972	26698.4	30121.1	26337.5	2208.2	2400.66	2547.72	27719	2385.53	3.53846	0	0	TXNIP	1	145992435	145996600	-	3625	protein_coding	thioredoxin interacting protein [Source:HGNC Symbol;Acc:HGNC:16952]	-
ENSG00000117394	24053	20540.8	22940.6	3322.32	3038.59	3248.03	22511.5	3202.98	2.81306	0	0	SLC2A1	1	42925375	42959176	-	4724	protein_coding	solute carrier family 2 member 1 [Source:HGNC Symbol;Acc:HGNC:11005]	-
ENSG00000148400	10822.4	9980.63	10695.7	1514.37	1611.7	1689.62	10499.6	1605.23	2.70933	0	0	NOTCH1	9	136494433	136545786	-	10377	protein_coding	notch 1 [Source:HGNC Symbol;Acc:HGNC:7881]	-
ENSG00000134757	14013.7	13775.5	13038.6	1458.76	1558.23	1618.7	13609.3	1545.23	3.13861	0	0	DSG3	18	31447795	31478702	+	5525	protein_coding	desmoglein 3 [Source:HGNC Symbol;Acc:HGNC:3050]	-
ENSG00000185479	11528.7	11913.9	10161.1	424.864	335.849	410.436	11201.2	390.383	4.84183	0	0	KRT6B	12	52446651	52452126	-	2282	protein_coding	keratin 6B [Source:HGNC Symbol;Acc:HGNC:6444]	-
ENSG00000171346	11301.6	11667.1	11037.9	623.619	591.957	639.146	11335.5	618.241	4.19622	0	0	KRT15	17	41513743	41522529	-	7069	protein_coding	keratin 15 [Source:HGNC Symbol;Acc:HGNC:6421]	-
ENSG00000140450	5256.96	5523.29	4843.3	599.003	622.916	598.369	5207.85	606.762	3.10173	0	0	ARRDC4	15	97960698	97973838	+	4072	protein_coding	arrestin domain containing 4 [Source:HGNC Symbol;Acc:HGNC:28087]	-
ENSG00000196611	6558.77	6338.37	6737.98	570.739	562.876	668.4	6545.04	600.672	3.44505	0	0	MMP1	11	102789920	102798160	-	1970	protein_coding	matrix metallopeptidase 1 [Source:HGNC Symbol;Acc:HGNC:7155]	-
ENSG00000163347	7007.39	7095.08	6712.84	563.446	559.123	598.369	6938.44	573.646	3.59609	0	0	CLDN1	3	190305701	190322475	-	3663	protein_coding	claudin 1 [Source:HGNC Symbol;Acc:HGNC:2032]	-
ENSG00000092295	5546.25	4987.76	4607.15	131.288	104.132	118.787	5047.05	118.069	5.41665	0	0	TGM1	14	24249114	24264432	-	3735	protein_coding	transglutaminase 1 [Source:HGNC Symbol;Acc:HGNC:11777]	-
ENSG00000136235	4893.08	5056.36	4711.01	352.837	311.458	368.772	4886.82	344.356	3.82606	0	0	GPNMB	7	23235967	23275108	+	6040	protein_coding	glycoprotein nmb [Source:HGNC Symbol;Acc:HGNC:4462]	-
ENSG00000169474	3981.14	2905	3563.05	100.29	83.4932	105.49	3483.06	96.4243	5.17286	0	0	SPRR1A	1	152985231	152985500	+	270	protein_coding	small proline rich protein 1A [Source:HGNC Symbol;Acc:HGNC:11259]	-
ENSG00000011426	248.609	227.321	296.283	3342.38	3761.88	3623.9	257.405	3576.05	-3.79764	6.17727e-308	8.55717e-305	ANLN	7	36389806	36453791	+	6012	protein_coding	anillin actin binding protein [Source:HGNC Symbol;Acc:HGNC:14082]	-
ENSG00000131747	251.999	305.143	333.455	3542.96	3805.04	3896.93	296.866	3748.31	-3.65699	7.74119e-303	1.00534e-299	TOP2A	17	40388516	40417950	-	6437	protein_coding	DNA topoisomerase II alpha [Source:HGNC Symbol;Acc:HGNC:11989]	-
ENSG00000163207	3160.73	2636.72	2359.33	44.6745	25.3294	43.4371	2718.93	37.8137	6.16303	2.80949e-288	3.43402e-285	IVL	1	152908545	152911886	+	2153	protein_coding	involucrin [Source:HGNC Symbol;Acc:HGNC:6187]	-
ENSG00000205420	143104	139358	127855	24699.5	21703.5	21990.7	136773	22797.9	2.5848	1.05502e-278	1.2179e-275	KRT6A	12	52487174	52493257	-	2928	protein_coding	keratin 6A [Source:HGNC Symbol;Acc:HGNC:6443]	-
ENSG00000074181	2430.72	1917.89	2014.94	51.9683	72.2357	74.4636	2121.19	66.2225	5.00079	6.63031e-264	7.25112e-261	NOTCH3	19	15159038	15200981	-	9394	protein_coding	notch 3 [Source:HGNC Symbol;Acc:HGNC:7883]	-
ENSG00000101057	96.0536	77.8217	108.236	2190.87	1913.78	2019.38	94.0372	2041.34	-4.44405	2.70459e-263	2.80994e-260	MYBL2	20	43667019	43716496	+	2777	protein_coding	MYB proto-oncogene like 2 [Source:HGNC Symbol;Acc:HGNC:7548]	MYB
ENSG00000189001	2661.25	2123.71	1994.17	48.3214	36.5869	59.3936	2259.71	48.1006	5.54934	6.86281e-260	6.79059e-257	SBSN	19	35523367	35528351	-	1986	protein_coding	suprabasin [Source:HGNC Symbol;Acc:HGNC:24950]	-
ENSG00000112972	3437.59	3162.02	3580.54	17326.4	18791.6	17673.6	3393.38	17930.5	-2.40181	1.26352e-256	1.19339e-253	HMGCS1	5	43289395	43313512	-	4702	protein_coding	3-hydroxy-3-methylglutaryl-CoA synthase 1 [Source:HGNC Symbol;Acc:HGNC:5007]	-
ENSG00000121742	3369.79	3100.58	3106.05	415.746	357.426	418.415	3192.14	397.196	3.00576	8.67773e-248	7.83977e-245	GJB6	13	20221962	20232395	-	3300	protein_coding	gap junction protein beta 6 [Source:HGNC Symbol;Acc:HGNC:4288]	-
ENSG00000075673	3607.1	2542.52	2897.23	82.0552	128.523	110.809	3015.62	107.129	4.81579	2.39427e-245	2.07294e-242	ATP12A	13	24680411	24712493	+	4442	protein_coding	ATPase H+/K+ transporting non-gastric alpha2 subunit [Source:HGNC Symbol;Acc:HGNC:13816]	-
ENSG00000272398	14873.6	15033.9	13817.1	3336	3315.34	3299.45	14574.9	3316.93	2.13559	9.64148e-244	8.01361e-241	CD24	6	106969831	106975627	-	3097	protein_coding	CD24 molecule [Source:HGNC Symbol;Acc:HGNC:1645]	-
ENSG00000109685	786.51	672.748	762.027	4604.21	4877.32	4893.32	740.428	4791.62	-2.69513	2.32139e-243	1.85524e-240	NSD2	4	1871424	1982207	+	19776	protein_coding	nuclear receptor binding SET domain protein 2 [Source:HGNC Symbol;Acc:HGNC:12766]	HMG
ENSG00000169509	1900.73	1875.91	1530.61	31.9104	36.5869	29.2536	1769.09	32.5836	5.76519	1.78828e-241	1.37625e-238	CRCT1	1	152514502	152516010	+	700	protein_coding	cysteine rich C-terminal 1 [Source:HGNC Symbol;Acc:HGNC:29875]	-
ENSG00000167900	174.027	193.53	170.554	2416.07	2088.27	2134.62	179.37	2212.99	-3.62344	2.30781e-241	1.71264e-238	TK1	17	78174075	78187233	-	1861	protein_coding	thymidine kinase 1 [Source:HGNC Symbol;Acc:HGNC:11830]	-
ENSG00000117399	212.448	180.219	249.271	2922.99	2540.44	2619.52	213.979	2694.32	-3.65658	7.15125e-238	5.124e-235	CDC20	1	43358955	43363203	+	2038	protein_coding	cell division cycle 20 [Source:HGNC Symbol;Acc:HGNC:1723]	-
ENSG00000178573	1750.44	1698.77	1545.92	79.32	106.008	103.717	1665.04	96.3485	4.11133	2.82039e-237	1.9535e-234	MAF	16	79585843	79600714	-	6976	protein_coding	MAF bZIP transcription factor [Source:HGNC Symbol;Acc:HGNC:6776]	TF_bZIP
ENSG00000129451	1967.4	1638.35	1782.07	134.935	122.894	116.128	1795.94	124.653	3.84877	1.14056e-231	7.64505e-229	KLK10	19	51012739	51020175	-	3853	protein_coding	kallikrein related peptidase 10 [Source:HGNC Symbol;Acc:HGNC:6358]	-
ENSG00000117595	17181.2	17335.8	15825.5	3717.1	3871.65	3908.45	16780.8	3832.4	2.1305	7.25045e-231	4.70804e-228	IRF6	1	209785623	209806175	-	4965	protein_coding	interferon regulatory factor 6 [Source:HGNC Symbol;Acc:HGNC:6121]	IRF
ENSG00000094804	102.834	80.8936	84.1838	1611.93	1517.89	1553.1	89.3037	1560.97	-4.13133	5.14367e-229	3.23879e-226	CDC6	17	40287633	40304657	+	5557	protein_coding	cell division cycle 6 [Source:HGNC Symbol;Acc:HGNC:1744]	-
ENSG00000168918	3445.5	3196.83	3270.05	441.275	500.959	514.154	3304.13	485.463	2.7666	7.60628e-229	4.64856e-226	INPP5D	2	233059967	233207903	+	8681	protein_coding	inositol polyphosphate-5-phosphatase D [Source:HGNC Symbol;Acc:HGNC:6079]	-
ENSG00000155660	4772.17	4491.13	5052.12	21483	20454	21246.1	4771.81	21061	-2.1421	7.63667e-228	4.53378e-225	PDIA4	7	149003062	149028641	-	3277	protein_coding	protein disulfide isomerase family A member 4 [Source:HGNC Symbol;Acc:HGNC:30167]	-
ENSG00000151914	47136.3	45597.4	48165.1	9372.53	10110.2	10814.1	46966.3	10098.9	2.21739	4.75416e-227	2.74407e-224	DST	6	56457987	56954628	-	42341	protein_coding	dystonin [Source:HGNC Symbol;Acc:HGNC:1090]	-
ENSG00000166598	16620.7	16668.2	17362.6	59798.2	59430.3	61046.9	16883.8	60091.8	-1.83153	1.24815e-225	7.00957e-223	HSP90B1	12	103930107	103953645	+	4695	protein_coding	heat shock protein 90 beta family member 1 [Source:HGNC Symbol;Acc:HGNC:12028]	-
ENSG00000206075	17911.2	18416.1	16863	4202.14	4173.72	4388.04	17730.1	4254.63	2.05907	5.56221e-224	3.0415e-221	SERPINB5	18	63476761	63505085	+	3939	protein_coding	serpin family B member 5 [Source:HGNC Symbol;Acc:HGNC:8949]	-
ENSG00000170465	2435.24	2185.15	2022.6	105.76	159.481	105.49	2214.33	123.577	4.16607	2.65887e-222	1.41663e-219	KRT6C	12	52468516	52473785	-	2896	protein_coding	keratin 6C [Source:HGNC Symbol;Acc:HGNC:20406]	-
ENSG00000167754	7878.66	6955.82	6563.05	1058.51	889.343	1035.4	7132.51	994.418	2.84212	1.32246e-219	6.86985e-217	KLK5	19	50943303	50953093	-	1653	protein_coding	kallikrein related peptidase 5 [Source:HGNC Symbol;Acc:HGNC:6366]	-
ENSG00000186832	69911.2	82561.6	55840.1	1065.81	874.333	1131.14	69437.6	1023.76	6.08366	5.92672e-219	3.00369e-216	KRT16	17	41609778	41615899	-	2475	protein_coding	keratin 16 [Source:HGNC Symbol;Acc:HGNC:6423]	-
ENSG00000166508	762.779	715.755	823.252	5195.01	4545.22	4721.35	767.262	4820.52	-2.65191	5.96336e-216	2.9503e-213	MCM7	7	100092728	100101940	-	4386	protein_coding	minichromosome maintenance complex component 7 [Source:HGNC Symbol;Acc:HGNC:6950]	-
ENSG00000069812	1673.59	1548.24	1556.85	157.728	136.966	154.246	1592.9	149.647	3.41097	1.69719e-214	8.20138e-212	HES2	1	6412418	6424670	-	5407	protein_coding	hes family bHLH transcription factor 2 [Source:HGNC Symbol;Acc:HGNC:16005]	bHLH
ENSG00000134057	390.995	405.492	355.321	3067.04	2674.6	2934.22	383.936	2891.95	-2.91264	9.18679e-214	4.33846e-211	CCNB1	5	69167010	69178245	+	2558	protein_coding	cyclin B1 [Source:HGNC Symbol;Acc:HGNC:1579]	-
ENSG00000013810	230.529	239.609	254.738	2356.81	2043.24	2112.46	241.625	2170.84	-3.16722	5.53692e-210	2.5567e-207	TACC3	4	1721490	1745176	+	6528	protein_coding	transforming acidic coiled-coil containing protein 3 [Source:HGNC Symbol;Acc:HGNC:11524]	-
ENSG00000100985	5567.72	5020.52	5899.42	878.902	895.91	982.211	5495.89	919.008	2.57985	6.17637e-209	2.78997e-206	MMP9	20	46008908	46016561	+	2336	protein_coding	matrix metallopeptidase 9 [Source:HGNC Symbol;Acc:HGNC:7176]	-
ENSG00000166535	2067.98	1432.53	1842.2	45.5862	28.1438	48.756	1780.9	40.8286	5.44189	4.25286e-206	1.88022e-203	A2ML1	12	8822472	8887001	+	7303	protein_coding	alpha-2-macroglobulin like 1 [Source:HGNC Symbol;Acc:HGNC:23336]	-
ENSG00000137975	6669.51	6532.93	6614.44	1324.74	1398.75	1530.05	6605.63	1417.84	2.21978	1.23449e-201	5.34407e-199	CLCA2	1	86424086	86456558	+	4496	protein_coding	chloride channel accessory 2 [Source:HGNC Symbol;Acc:HGNC:2016]	-
ENSG00000143320	1640.82	1745.87	1594.03	186.903	179.182	203.002	1660.24	189.696	3.129	1.9586e-199	8.30564e-197	CRABP2	1	156699606	156705816	-	1100	protein_coding	cellular retinoic acid binding protein 2 [Source:HGNC Symbol;Acc:HGNC:2339]	-
ENSG00000088325	407.945	441.331	403.426	2594.77	2456.01	2535.31	417.567	2528.7	-2.59749	1.94179e-198	8.0697e-196	TPX2	20	31739271	31801805	+	3605	protein_coding	TPX2, microtubule nucleation factor [Source:HGNC Symbol;Acc:HGNC:1249]	-
ENSG00000112378	36284.5	37246.9	33035	8875.64	8668.28	9135.09	35522.2	8893	1.99796	3.29377e-197	1.34198e-194	PERP	6	138088505	138107511	-	4290	protein_coding	PERP, TP53 apoptosis effector [Source:HGNC Symbol;Acc:HGNC:17637]	-
ENSG00000176046	3168.64	3885.96	2846.94	337.338	314.272	328.881	3300.52	326.83	3.33617	7.04591e-197	2.81552e-194	NUPR1	16	28532708	28539174	-	5674	protein_coding	nuclear protein 1, transcriptional regulator [Source:HGNC Symbol;Acc:HGNC:29990]	-
ENSG00000170312	103.964	142.332	134.475	1567.25	1672.68	1507.89	126.924	1582.61	-3.63627	8.30347e-196	3.25543e-193	CDK1	10	60778331	60794852	+	3931	protein_coding	cyclin dependent kinase 1 [Source:HGNC Symbol;Acc:HGNC:1722]	-
ENSG00000158055	1217.06	1108.96	1125	23.7048	31.8963	39.0048	1150.34	31.5353	5.18623	1.23249e-194	4.74257e-192	GRHL3	1	24319322	24364482	+	3940	protein_coding	grainyhead like transcription factor 3 [Source:HGNC Symbol;Acc:HGNC:25839]	CP2
ENSG00000169679	82.4931	101.373	99.4899	1321.09	1280.54	1320.84	94.452	1307.49	-3.78823	1.6094e-194	6.08031e-192	BUB1	2	110637698	110678114	-	6032	protein_coding	BUB1 mitotic checkpoint serine/threonine kinase [Source:HGNC Symbol;Acc:HGNC:1148]	-
ENSG00000089685	71.1927	69.6299	79.8106	1500.7	1258.96	1324.39	73.5444	1361.35	-4.21115	2.76672e-193	1.0266e-190	BIRC5	17	78214186	78225636	+	3815	protein_coding	baculoviral IAP repeat containing 5 [Source:HGNC Symbol;Acc:HGNC:593]	-
ENSG00000071539	171.766	159.739	168.368	1517.11	1473.8	1551.33	166.624	1514.08	-3.18487	4.20037e-191	1.53122e-188	TRIP13	5	892643	919357	+	3560	protein_coding	thyroid hormone receptor interactor 13 [Source:HGNC Symbol;Acc:HGNC:12307]	-
ENSG00000163216	1658.9	1464.28	1694.61	138.582	117.266	158.678	1605.93	138.175	3.53653	5.02668e-190	1.80085e-187	SPRR2D	1	153039725	153041931	-	1057	protein_coding	small proline rich protein 2D [Source:HGNC Symbol;Acc:HGNC:11264]	-
ENSG00000167767	1632.91	1273.82	1284.62	64.7324	50.6588	69.1448	1397.12	61.512	4.50248	9.96539e-190	3.50967e-187	KRT80	12	52168996	52192000	-	4350	protein_coding	keratin 80 [Source:HGNC Symbol;Acc:HGNC:27056]	-
ENSG00000136689	2271.39	2205.63	2313.41	404.806	397.765	413.096	2263.48	405.222	2.48147	9.57009e-189	3.31428e-186	IL1RN	2	113107214	113134016	+	3256	protein_coding	interleukin 1 receptor antagonist [Source:HGNC Symbol;Acc:HGNC:6000]	-
ENSG00000173801	32787.1	29938.8	30839.7	8446.21	7625.09	7802.73	31188.5	7958.01	1.9705	2.28937e-187	7.79851e-185	JUP	17	41754604	41786931	-	4942	protein_coding	junction plakoglobin [Source:HGNC Symbol;Acc:HGNC:6207]	-
ENSG00000117724	135.605	123.9	183.674	1649.31	1752.42	1741.92	147.726	1714.55	-3.53879	7.0831e-186	2.37387e-183	CENPF	1	214603195	214664588	+	11690	protein_coding	centromere protein F [Source:HGNC Symbol;Acc:HGNC:1857]	-
ENSG00000166851	145.775	159.739	158.528	1658.43	1492.56	1466.22	154.681	1539.07	-3.31359	2.28842e-185	7.54779e-183	PLK1	16	23677656	23690367	+	4760	protein_coding	polo like kinase 1 [Source:HGNC Symbol;Acc:HGNC:9077]	-
ENSG00000062038	26924.4	26515.7	27170.6	8575.68	8330.56	8659.06	26870.2	8521.76	1.65675	3.23689e-182	1.05093e-179	CDH3	16	68636189	68722616	+	6236	protein_coding	cadherin 3 [Source:HGNC Symbol;Acc:HGNC:1762]	-
ENSG00000171241	61.0223	66.558	59.038	1143.3	1114.49	1076.18	62.2061	1111.32	-4.15716	5.03094e-180	1.60828e-177	SHCBP1	16	46580554	46621626	-	4459	protein_coding	SHC binding and spindle associated 1 [Source:HGNC Symbol;Acc:HGNC:29547]	-
ENSG00000186480	1431.76	1296.35	1404.89	5536.9	5825.76	5751.43	1377.66	5704.7	-2.0504	1.34616e-179	4.23815e-177	INSIG1	7	155297776	155310235	+	3650	protein_coding	insulin induced gene 1 [Source:HGNC Symbol;Acc:HGNC:6083]	-
ENSG00000123416	1789.99	1633.23	2016.04	10397.3	9637.37	9143.96	1813.09	9726.21	-2.42373	2.54213e-179	7.88401e-177	TUBA1B	12	49127782	49131397	-	3574	protein_coding	tubulin alpha 1b [Source:HGNC Symbol;Acc:HGNC:18809]	-
ENSG00000180573	954.886	1028.07	1021.14	51.0566	45.9682	57.6207	1001.36	51.5485	4.27789	2.69509e-179	8.23549e-177	HIST1H2AC	6	26124145	26139116	+	1668	protein_coding	histone cluster 1 H2A family member c [Source:HGNC Symbol;Acc:HGNC:4733]	-
ENSG00000109805	80.233	70.6539	65.5977	1109.57	1117.31	1138.23	72.1616	1121.7	-3.96007	1.93963e-178	5.84109e-176	NCAPG	4	17810902	17844862	+	4921	protein_coding	non-SMC condensin I complex subunit G [Source:HGNC Symbol;Acc:HGNC:24304]	-
ENSG00000137807	113.004	70.6539	121.356	1454.2	1490.68	1433.43	101.671	1459.44	-3.85001	2.16964e-175	6.44043e-173	KIF23	15	69414246	69448427	+	6576	protein_coding	kinesin family member 23 [Source:HGNC Symbol;Acc:HGNC:6392]	-
ENSG00000124762	27133.5	28182.7	25629	7957.53	7573.49	7855.91	26981.7	7795.64	1.79124	6.82784e-175	1.99825e-172	CDKN1A	6	36676460	36687339	+	3050	protein_coding	cyclin dependent kinase inhibitor 1A [Source:HGNC Symbol;Acc:HGNC:1784]	-
ENSG00000138180	55.3721	82.9415	68.8776	1105.01	1144.51	1141.78	69.0637	1130.43	-4.02616	6.48405e-173	1.87128e-170	CEP55	10	93496632	93529092	+	3271	protein_coding	centrosomal protein 55 [Source:HGNC Symbol;Acc:HGNC:1161]	-
ENSG00000066279	85.8832	53.2464	73.2508	1150.6	1336.83	1340.35	70.7935	1275.92	-4.17916	4.6187e-172	1.31468e-169	ASPM	1	197084128	197146694	-	10887	protein_coding	abnormal spindle microtubule assembly [Source:HGNC Symbol;Acc:HGNC:19048]	-
ENSG00000136826	1517.65	1524.69	1422.38	206.05	171.677	171.976	1488.24	183.234	3.02188	1.41414e-171	3.97086e-169	KLF4	9	107484852	107490482	-	3659	protein_coding	Kruppel like factor 4 [Source:HGNC Symbol;Acc:HGNC:6348]	zf-C2H2
ENSG00000142945	74.5828	74.7498	76.5307	1079.48	1046.95	1091.25	75.2878	1072.56	-3.83262	3.01019e-171	8.33983e-169	KIF2C	1	44739818	44767767	+	3646	protein_coding	kinesin family member 2C [Source:HGNC Symbol;Acc:HGNC:6393]	-
ENSG00000171848	68.9326	49.1505	39.3586	1098.63	1081.66	1072.63	52.4806	1084.31	-4.37398	1.5774e-168	4.31274e-166	RRM2	2	10120698	10131419	+	5323	protein_coding	ribonucleotide reductase regulatory subunit M2 [Source:HGNC Symbol;Acc:HGNC:10452]	-
ENSG00000100297	342.403	277.496	344.388	2589.3	2215.85	2301.28	321.429	2368.81	-2.88353	8.08465e-167	2.1817e-164	MCM5	22	35400063	35425430	+	7338	protein_coding	minichromosome maintenance complex component 5 [Source:HGNC Symbol;Acc:HGNC:6948]	-
ENSG00000166033	12537.8	13309.6	12467.9	3758.13	3447.61	3655.81	12771.8	3620.52	1.81867	1.11011e-166	2.95731e-164	HTRA1	10	122458551	122514908	+	2279	protein_coding	HtrA serine peptidase 1 [Source:HGNC Symbol;Acc:HGNC:9476]	-
ENSG00000166670	1097.27	1113.05	1058.31	115.789	104.132	103.717	1089.55	107.879	3.33634	5.8267e-166	1.53257e-163	MMP10	11	102770503	102780628	-	1758	protein_coding	matrix metallopeptidase 10 [Source:HGNC Symbol;Acc:HGNC:7156]	-
ENSG00000166396	2966.36	3284.89	2815.24	596.268	576.009	558.477	3022.16	576.918	2.38947	1.33071e-165	3.45635e-163	SERPINB7	18	63752935	63805376	+	2637	protein_coding	serpin family B member 7 [Source:HGNC Symbol;Acc:HGNC:13902]	-
ENSG00000196743	11164.8	10773.2	10890.3	3441.76	3378.19	3490.93	10942.8	3436.96	1.6707	1.4252e-165	3.65607e-163	GM2A	5	151212150	151270440	+	4479	protein_coding	GM2 ganglioside activator [Source:HGNC Symbol;Acc:HGNC:4367]	-
ENSG00000179593	3773.21	3191.71	3924.93	424.864	410.899	540.748	3629.95	458.837	2.98292	2.89406e-165	7.33361e-163	ALOX15B	17	8039017	8049134	+	3028	protein_coding	arachidonate 15-lipoxygenase, type B [Source:HGNC Symbol;Acc:HGNC:434]	-
ENSG00000124466	4345.01	3929.99	3604.6	712.968	593.834	684.356	3959.87	663.719	2.57635	3.09266e-165	7.74245e-163	LYPD3	19	43460787	43465660	-	2519	protein_coding	LY6/PLAUR domain containing 3 [Source:HGNC Symbol;Acc:HGNC:24880]	-
ENSG00000112118	585.362	547.824	598.033	2713.29	2638.95	2699.31	577.073	2683.85	-2.21812	1.62226e-164	4.01297e-162	MCM3	6	52264009	52284881	-	3650	protein_coding	minichromosome maintenance complex component 3 [Source:HGNC Symbol;Acc:HGNC:6945]	-
ENSG00000140525	273.47	232.441	267.857	1681.22	1728.97	1822.59	257.923	1744.26	-2.75952	2.92674e-163	7.15468e-161	FANCI	15	89243949	89317261	+	7766	protein_coding	FA complementation group I [Source:HGNC Symbol;Acc:HGNC:25568]	-
ENSG00000152952	1785.47	1670.09	1764.58	6570.8	7297.68	6667.16	1740.05	6845.21	-1.97618	1.41212e-162	3.41192e-160	PLOD2	3	146069440	146163653	-	7646	protein_coding	procollagen-lysine,2-oxoglutarate 5-dioxygenase 2 [Source:HGNC Symbol;Acc:HGNC:9082]	-
ENSG00000125775	1271.3	1352.66	1184.04	152.258	133.214	150.7	1269.33	145.391	3.12548	3.54643e-160	8.47025e-158	SDCBP2	20	1309909	1329239	-	2653	protein_coding	syndecan binding protein 2 [Source:HGNC Symbol;Acc:HGNC:15756]	-
ENSG00000146670	118.654	105.469	142.128	1517.11	1352.78	1257.02	122.084	1375.63	-3.49616	6.30675e-158	1.48918e-155	CDCA5	11	65066300	65084164	-	3925	protein_coding	cell division cycle associated 5 [Source:HGNC Symbol;Acc:HGNC:14626]	-
ENSG00000178999	62.1523	73.7258	79.8106	1115.04	1021.62	991.962	71.8962	1042.87	-3.85646	1.01501e-157	2.36975e-155	AURKB	17	8204733	8210600	-	2241	protein_coding	aurora kinase B [Source:HGNC Symbol;Acc:HGNC:11390]	-
ENSG00000164109	163.856	190.458	186.954	1429.58	1360.28	1345.66	180.423	1378.51	-2.93195	1.23522e-157	2.85184e-155	MAD2L1	4	120055608	120067074	-	5748	protein_coding	mitotic arrest deficient 2 like 1 [Source:HGNC Symbol;Acc:HGNC:6763]	-
ENSG00000104738	862.222	751.594	846.211	3533.84	3604.28	3722.3	820.009	3620.14	-2.14324	1.46456e-157	3.34419e-155	MCM4	8	47960185	47978160	+	6973	protein_coding	minichromosome maintenance complex component 4 [Source:HGNC Symbol;Acc:HGNC:6947]	-
ENSG00000146918	190.977	174.075	163.994	1315.62	1459.72	1452.04	176.349	1409.13	-2.99918	2.51629e-157	5.68325e-155	NCAPG2	7	158631311	158704829	-	6988	protein_coding	non-SMC condensin II complex subunit G2 [Source:HGNC Symbol;Acc:HGNC:21904]	-
ENSG00000111206	89.2734	77.8217	104.956	1168.83	1054.45	1116.07	90.6838	1113.12	-3.6204	2.88934e-157	6.45565e-155	FOXM1	12	2857681	2877155	-	4899	protein_coding	forkhead box M1 [Source:HGNC Symbol;Acc:HGNC:3818]	Fork
ENSG00000126787	61.0223	50.1745	65.5977	988.309	957.827	939.66	58.9315	961.932	-4.03265	1.92657e-156	4.25875e-154	DLGAP5	14	55148112	55191678	-	3667	protein_coding	DLG associated protein 5 [Source:HGNC Symbol;Acc:HGNC:16864]	-
ENSG00000137310	140.125	107.517	115.889	1210.77	1148.27	1187.87	121.177	1182.3	-3.29002	7.09587e-155	1.55205e-152	TCF19	6	31158542	31167159	+	3538	protein_coding	transcription factor 19 [Source:HGNC Symbol;Acc:HGNC:11629]	Others
ENSG00000185585	2786.69	2491.32	2767.13	483.214	475.63	554.931	2681.71	504.592	2.40918	1.36941e-153	2.96406e-151	OLFML2A	9	124777158	124814885	+	6746	protein_coding	olfactomedin like 2A [Source:HGNC Symbol;Acc:HGNC:27270]	-
ENSG00000175063	45.2017	65.534	87.4637	1291.91	1076.97	1180.78	66.0665	1183.22	-4.15977	1.49162e-151	3.19529e-149	UBE2C	20	45812576	45816957	+	1286	protein_coding	ubiquitin conjugating enzyme E2 C [Source:HGNC Symbol;Acc:HGNC:15937]	-
ENSG00000120437	892.734	922.596	903.062	3907.65	3561.13	3583.12	906.131	3683.97	-2.02327	2.39308e-151	5.07406e-149	ACAT2	6	159760328	159779055	+	4299	protein_coding	acetyl-CoA acetyltransferase 2 [Source:HGNC Symbol;Acc:HGNC:94]	-
ENSG00000137699	9476.54	8605.44	9101.69	2648.56	2516.99	2697.53	9061.22	2621.03	1.78939	1.85761e-150	3.89892e-148	TRIM29	11	120111275	120185529	-	10218	protein_coding	tripartite motif containing 29 [Source:HGNC Symbol;Acc:HGNC:17274]	-
ENSG00000165474	17705.5	15339.1	17240.2	4398.16	3836.93	4194.78	16761.6	4143.29	2.0162	1.29637e-149	2.68212e-147	GJB2	13	20187463	20193010	-	2546	protein_coding	gap junction protein beta 2 [Source:HGNC Symbol;Acc:HGNC:4284]	-
ENSG00000223573	885.953	789.48	830.905	22.7931	29.0819	39.0048	835.446	30.2933	4.78167	1.30369e-149	2.68212e-147	TINCR	19	5558167	5578349	-	4429	protein_coding	TINCR ubiquitin domain containing [Source:HGNC Symbol;Acc:HGNC:14607]	-
ENSG00000143217	864.483	885.734	760.934	37.3807	27.2056	37.2318	837.05	33.9394	4.62141	2.01076e-149	4.09623e-147	NECTIN4	1	161070995	161089599	-	3502	protein_coding	nectin cell adhesion molecule 4 [Source:HGNC Symbol;Acc:HGNC:19688]	-
ENSG00000168496	299.461	267.256	314.869	1964.77	1809.64	1725.96	293.862	1833.46	-2.64258	1.78033e-148	3.59161e-146	FEN1	11	61792637	61797244	+	2478	protein_coding	flap structure-specific endonuclease 1 [Source:HGNC Symbol;Acc:HGNC:3650]	-
ENSG00000143476	49.7219	72.7018	62.3179	928.135	940.94	1031.85	61.5805	966.976	-3.96699	3.06498e-148	6.12377e-146	DTL	1	212035553	212107400	+	4916	protein_coding	denticleless E3 ubiquitin protein ligase homolog [Source:HGNC Symbol;Acc:HGNC:30288]	-
ENSG00000118193	58.7622	56.3183	51.3849	853.374	973.775	937.887	55.4885	921.679	-4.05427	1.27385e-147	2.52089e-145	KIF14	1	200551497	200620734	-	7277	protein_coding	kinesin family member 14 [Source:HGNC Symbol;Acc:HGNC:19181]	-
ENSG00000184292	12498.3	12579.5	11492.7	3780.92	3547.05	3710.77	12190.2	3679.58	1.72807	1.27833e-146	2.5059e-144	TACSTD2	1	58575423	58577773	-	2351	protein_coding	tumor associated calcium signal transducer 2 [Source:HGNC Symbol;Acc:HGNC:11530]	-
ENSG00000237649	94.9236	116.733	125.729	1167.01	1106.05	1069.97	112.462	1114.34	-3.30647	1.32029e-146	2.56395e-144	KIFC1	6	33391536	33409924	+	3345	protein_coding	kinesin family member C1 [Source:HGNC Symbol;Acc:HGNC:6389]	-
ENSG00000128510	1924.46	1614.8	1636.66	272.606	249.541	239.347	1725.31	253.831	2.76475	1.81415e-146	3.49038e-144	CPA4	7	130293134	130324180	+	3958	protein_coding	carboxypeptidase A4 [Source:HGNC Symbol;Acc:HGNC:15740]	-
ENSG00000137812	81.3631	84.9895	98.3966	958.222	1043.2	1122.27	88.2497	1041.23	-3.56062	2.64381e-145	5.03998e-143	KNL1	15	40594020	40664342	+	10250	protein_coding	kinetochore scaffold 1 [Source:HGNC Symbol;Acc:HGNC:24054]	-
ENSG00000139734	113.004	97.2771	129.009	1057.6	1172.66	1127.59	113.097	1119.28	-3.30947	4.66314e-145	8.80866e-143	DIAPH3	13	59665583	60163987	-	7442	protein_coding	diaphanous related formin 3 [Source:HGNC Symbol;Acc:HGNC:15480]	-
ENSG00000113368	87.0133	78.8456	94.0234	944.546	954.074	1012.35	86.6275	970.324	-3.48758	6.56648e-145	1.22923e-142	LMNB1	5	126776623	126837020	+	3633	protein_coding	lamin B1 [Source:HGNC Symbol;Acc:HGNC:6637]	-
ENSG00000087086	43110	51076.6	42381.6	10297.9	8512.55	9828.31	45522.7	9546.26	2.25357	1.4923e-144	2.76861e-142	FTL	19	48965301	48966878	+	878	protein_coding	ferritin light chain [Source:HGNC Symbol;Acc:HGNC:3999]	-
ENSG00000122952	117.524	124.924	129.009	1187.98	1097.61	1054.9	123.819	1113.5	-3.1681	1.72026e-144	3.1633e-142	ZWINT	10	56357228	56361275	-	2378	protein_coding	ZW10 interacting kinetochore protein [Source:HGNC Symbol;Acc:HGNC:13195]	-
ENSG00000105011	44.0717	51.1985	61.2246	1032.98	894.034	889.131	52.1649	938.716	-4.16821	1.74661e-144	3.18359e-142	ASF1B	19	14119509	14136956	-	2304	protein_coding	anti-silencing function 1B histone chaperone [Source:HGNC Symbol;Acc:HGNC:20996]	-
ENSG00000163202	1143.6	884.71	882.29	29.1752	21.5769	13.2971	970.201	21.3497	5.50966	8.60111e-144	1.55411e-141	LCE3D	1	152579381	152580504	-	613	protein_coding	late cornified envelope 3D [Source:HGNC Symbol;Acc:HGNC:16615]	-
ENSG00000137033	795.55	952.292	834.185	13.6759	24.3913	29.2536	860.675	22.4402	5.25945	1.50692e-143	2.69934e-141	IL33	9	6215786	6257983	+	3253	protein_coding	interleukin 33 [Source:HGNC Symbol;Acc:HGNC:16028]	-
ENSG00000104419	14817.1	13771.4	14734.3	4561.36	4517.08	4794.93	14440.9	4624.45	1.64271	1.96269e-143	3.48571e-141	NDRG1	8	133237171	133302022	-	9823	protein_coding	N-myc downstream regulated 1 [Source:HGNC Symbol;Acc:HGNC:7679]	-
ENSG00000127564	126.565	91.1333	133.382	1594.61	1282.42	1301.34	117.027	1392.79	-3.57723	2.69023e-143	4.73732e-141	PKMYT1	16	2968024	2980539	-	5034	protein_coding	protein kinase, membrane associated tyrosine/threonine 1 [Source:HGNC Symbol;Acc:HGNC:29650]	-
ENSG00000119888	94.9236	84.9895	79.8106	946.37	1000.04	929.023	86.5745	958.478	-3.46998	5.56021e-143	9.70888e-141	EPCAM	2	47345158	47387601	+	2519	protein_coding	epithelial cell adhesion molecule [Source:HGNC Symbol;Acc:HGNC:11529]	-
ENSG00000164733	20621	19891.6	21437.3	6810.58	6230.09	6653.86	20650	6564.84	1.65325	2.3051e-142	3.99147e-140	CTSB	8	11842524	11869448	-	7428	protein_coding	cathepsin B [Source:HGNC Symbol;Acc:HGNC:2527]	-
ENSG00000124107	1198.98	1279.96	837.465	21.8814	14.0719	17.7294	1105.47	17.8942	5.94707	9.99972e-141	1.71722e-138	SLPI	20	45252239	45254564	-	596	protein_coding	secretory leukocyte peptidase inhibitor [Source:HGNC Symbol;Acc:HGNC:11092]	-
ENSG00000157456	70.0626	88.0614	81.9972	939.076	900.601	914.839	80.0404	918.172	-3.51658	3.95859e-140	6.74226e-138	CCNB2	15	59105078	59125045	+	2801	protein_coding	cyclin B2 [Source:HGNC Symbol;Acc:HGNC:1580]	-
ENSG00000121152	48.5918	28.6711	54.6648	858.844	877.148	882.04	43.9759	872.677	-4.3202	2.85498e-139	4.82306e-137	NCAPH	2	96335787	96373845	+	3278	protein_coding	non-SMC condensin I complex subunit H [Source:HGNC Symbol;Acc:HGNC:1112]	-
ENSG00000144452	1575.28	1214.43	1484.7	158.64	177.306	166.657	1424.8	167.534	3.08804	9.39646e-139	1.57459e-136	ABCA12	2	214931542	215138428	-	9416	protein_coding	ATP binding cassette subfamily A member 12 [Source:HGNC Symbol;Acc:HGNC:14637]	-
ENSG00000113810	325.452	376.821	396.866	1971.15	2275.89	2319.01	366.38	2188.68	-2.57778	2.98496e-138	4.96196e-136	SMC4	3	160399274	160434962	+	8457	protein_coding	structural maintenance of chromosomes 4 [Source:HGNC Symbol;Acc:HGNC:14013]	-
ENSG00000132780	720.967	753.642	814.505	2971.31	3086.43	3141.66	763.038	3066.47	-2.00663	5.68822e-138	9.3806e-136	NASP	1	45583846	45618904	+	8304	protein_coding	nuclear autoantigenic sperm protein [Source:HGNC Symbol;Acc:HGNC:7644]	-
ENSG00000138160	128.825	124.924	136.662	1029.34	1145.45	1051.36	130.137	1075.38	-3.04723	2.14152e-136	3.50383e-134	KIF11	10	92593286	92655395	+	4860	protein_coding	kinesin family member 11 [Source:HGNC Symbol;Acc:HGNC:6388]	-
ENSG00000136542	1606.92	1741.77	1679.3	253.459	272.995	320.903	1676	282.452	2.56831	2.93729e-136	4.76827e-134	GALNT5	2	157257598	157314211	+	6818	protein_coding	polypeptide N-acetylgalactosaminyltransferase 5 [Source:HGNC Symbol;Acc:HGNC:4127]	-
ENSG00000172818	794.42	822.247	766.4	47.4097	57.2257	69.1448	794.356	57.9267	3.77581	4.39588e-135	7.05738e-133	OVOL1	11	65787022	65797219	+	3849	protein_coding	ovo like transcriptional repressor 1 [Source:HGNC Symbol;Acc:HGNC:8525]	zf-C2H2
ENSG00000134317	971.837	961.507	816.692	88.4373	85.3695	84.2148	916.679	86.0072	3.41406	4.41532e-135	7.05738e-133	GRHL1	2	9951693	10002277	+	7952	protein_coding	grainyhead like transcription factor 1 [Source:HGNC Symbol;Acc:HGNC:17923]	CP2
ENSG00000161011	6988.18	6883.12	6760.94	2246.49	2025.41	2143.49	6877.42	2138.46	1.68519	1.00059e-134	1.58712e-132	SQSTM1	5	179806398	179838078	+	7654	protein_coding	sequestosome 1 [Source:HGNC Symbol;Acc:HGNC:11280]	-
ENSG00000138778	111.874	106.493	119.169	967.34	1167.03	1125.82	112.512	1086.73	-3.27269	1.29912e-134	2.04503e-132	CENPE	4	103105806	103198409	-	9444	protein_coding	centromere protein E [Source:HGNC Symbol;Acc:HGNC:1856]	-
ENSG00000203837	857.702	852.967	768.587	41.0276	21.5769	50.5289	826.419	37.7111	4.44664	2.52375e-134	3.94294e-132	PNLIPRP3	10	116427867	116477957	+	2354	protein_coding	pancreatic lipase related protein 3 [Source:HGNC Symbol;Acc:HGNC:23492]	-
ENSG00000010292	785.38	696.299	816.692	3064.31	3131.46	3183.32	766.124	3126.36	-2.02969	1.13166e-133	1.75484e-131	NCAPD2	12	6493356	6531955	+	6487	protein_coding	non-SMC condensin I complex subunit D2 [Source:HGNC Symbol;Acc:HGNC:24305]	-
ENSG00000024526	30.5111	32.767	51.3849	772.231	893.096	874.948	38.221	846.758	-4.47052	8.02302e-133	1.23489e-130	DEPDC1	1	68474152	68497221	-	5904	protein_coding	DEP domain containing 1 [Source:HGNC Symbol;Acc:HGNC:22949]	-
ENSG00000159388	3320.07	3507.1	3158.53	756.731	818.046	869.629	3328.56	814.802	2.03032	1.25546e-132	1.91818e-130	BTG2	1	203305491	203309602	+	2757	protein_coding	BTG anti-proliferation factor 2 [Source:HGNC Symbol;Acc:HGNC:1131]	-
ENSG00000172716	101.704	71.6779	88.557	933.606	912.796	929.909	87.3129	925.437	-3.41113	1.26996e-132	1.92616e-130	SLFN11	17	35350305	35373701	-	5982	protein_coding	schlafen family member 11 [Source:HGNC Symbol;Acc:HGNC:26633]	-
ENSG00000125848	1637.43	1721.29	1773.33	365.601	374.312	355.475	1710.68	365.13	2.22846	2.03693e-132	3.06706e-130	FLRT3	20	14322988	14337616	-	5190	protein_coding	fibronectin leucine rich transmembrane protein 3 [Source:HGNC Symbol;Acc:HGNC:3762]	-
ENSG00000111602	232.789	204.794	200.073	1288.27	1273.04	1325.28	212.552	1295.53	-2.60902	1.19318e-131	1.78367e-129	TIMELESS	12	56416373	56449403	-	5818	protein_coding	timeless circadian regulator [Source:HGNC Symbol;Acc:HGNC:11813]	-
ENSG00000205076	7120.4	7850.77	7349.13	1630.16	1168.9	1373.14	7440.1	1390.74	2.41934	1.35165e-131	2.00615e-129	LGALS7	19	38770971	38773492	-	795	protein_coding	galectin 7 [Source:HGNC Symbol;Acc:HGNC:6568]	-
ENSG00000072571	48.5918	39.9348	76.5307	866.138	935.311	914.839	55.0191	905.43	-4.04521	3.26869e-131	4.81703e-129	HMMR	5	163460203	163491945	+	3936	protein_coding	hyaluronan mediated motility receptor [Source:HGNC Symbol;Acc:HGNC:5012]	-
ENSG00000145386	125.435	104.445	158.528	1201.65	1165.15	1124.05	129.469	1163.62	-3.17082	1.02499e-130	1.49988e-128	CCNA2	4	121816444	121823933	-	2798	protein_coding	cyclin A2 [Source:HGNC Symbol;Acc:HGNC:1578]	-
ENSG00000096696	42143.8	38304.6	39999.3	10806.7	11894.5	12646.4	40149.3	11782.5	1.76869	6.87402e-130	9.98849e-128	DSP	6	7541575	7586717	+	10093	protein_coding	desmoplakin [Source:HGNC Symbol;Acc:HGNC:3052]	-
ENSG00000156970	71.1927	51.1985	83.0905	859.756	898.725	873.175	68.4939	877.218	-3.68454	9.80693e-130	1.41513e-127	BUB1B	15	40161023	40221136	+	4476	protein_coding	BUB1 mitotic checkpoint serine/threonine kinase B [Source:HGNC Symbol;Acc:HGNC:1149]	-
ENSG00000123485	47.4618	35.8389	69.9709	913.548	820.86	904.201	51.0906	879.536	-4.11149	5.47961e-129	7.85247e-127	HJURP	2	233833416	233854566	-	3821	protein_coding	Holliday junction recognition protein [Source:HGNC Symbol;Acc:HGNC:25444]	-
ENSG00000141579	732.268	707.563	669.097	18.2345	21.5769	16.843	702.976	18.8848	5.221	6.02213e-129	8.57082e-127	ZNF750	17	82829435	82840578	-	3713	protein_coding	zinc finger protein 750 [Source:HGNC Symbol;Acc:HGNC:25843]	-
ENSG00000102265	6768.96	6851.38	6479.96	2270.19	2159.57	2244.55	6700.1	2224.77	1.59049	7.52287e-129	1.06339e-126	TIMP1	X	47582313	47586789	+	1541	protein_coding	TIMP metallopeptidase inhibitor 1 [Source:HGNC Symbol;Acc:HGNC:11820]	-
ENSG00000241794	769.559	842.727	760.934	40.1159	41.2775	66.4854	791.073	49.2929	4.00015	5.56495e-128	7.81311e-126	SPRR2A	1	153056113	153057537	-	709	protein_coding	small proline rich protein 2A [Source:HGNC Symbol;Acc:HGNC:11261]	-
ENSG00000128422	177926	200998	165657	48490.1	40793.5	41592.4	181527	43625.3	2.05695	9.16622e-128	1.27829e-125	KRT17	17	41619441	41624842	-	3130	protein_coding	keratin 17 [Source:HGNC Symbol;Acc:HGNC:6427]	-
ENSG00000134871	1773.04	1482.71	1659.62	5973.62	5903.63	5884.4	1638.46	5920.55	-1.85401	1.29452e-127	1.79325e-125	COL4A2	13	110305812	110513209	+	19293	protein_coding	collagen type IV alpha 2 chain [Source:HGNC Symbol;Acc:HGNC:2203]	-
ENSG00000088002	757.129	684.012	631.925	36.469	34.7107	33.6859	691.022	34.9552	4.30518	5.36421e-127	7.38165e-125	SULT2B1	19	48552075	48599425	+	2822	protein_coding	sulfotransferase family 2B member 1 [Source:HGNC Symbol;Acc:HGNC:11459]	-
ENSG00000081277	20468.5	17519.1	18934.8	5888.83	5589.35	5858.69	18974.1	5778.96	1.71507	1.57835e-126	2.15767e-124	PKP1	1	201283452	201332993	+	6211	protein_coding	plakophilin 1 [Source:HGNC Symbol;Acc:HGNC:9023]	-
ENSG00000261150	5502.18	4947.82	4971.22	1425.03	1544.16	1441.4	5140.4	1470.19	1.80589	3.09107e-126	4.19799e-124	EPPK1	8	143857324	143878464	-	16002	protein_coding	epiplakin 1 [Source:HGNC Symbol;Acc:HGNC:15577]	-
ENSG00000025708	2229.57	2231.23	1946.07	435.804	406.208	348.383	2135.62	396.799	2.42877	3.66278e-126	4.94214e-124	TYMP	22	50525752	50530056	-	3320	protein_coding	thymidine phosphorylase [Source:HGNC Symbol;Acc:HGNC:3148]	-
ENSG00000075218	33.9013	28.6711	29.519	750.349	746.748	690.562	30.6971	729.22	-4.57307	2.76452e-125	3.70606e-123	GTSE1	22	46296741	46330810	+	4242	protein_coding	G2 and S-phase expressed 1 [Source:HGNC Symbol;Acc:HGNC:13698]	-
ENSG00000076382	85.8832	82.9415	94.0234	837.875	820.86	832.397	87.6161	830.377	-3.24542	6.49341e-124	8.64914e-122	SPAG5	17	28577565	28599279	-	5472	protein_coding	sperm associated antigen 5 [Source:HGNC Symbol;Acc:HGNC:13452]	-
ENSG00000182481	1269.04	1107.93	1267.13	5061.89	4451.41	4669.05	1214.7	4727.45	-1.96107	1.28115e-123	1.69561e-121	KPNA2	17	68035519	68046842	+	3140	protein_coding	karyopherin subunit alpha 2 [Source:HGNC Symbol;Acc:HGNC:6395]	-
ENSG00000159348	3925.77	4441.98	3846.21	1108.66	1006.61	995.508	4071.32	1036.92	1.9734	2.19346e-122	2.88468e-120	CYB5R1	1	202961869	202967280	-	4504	protein_coding	cytochrome b5 reductase 1 [Source:HGNC Symbol;Acc:HGNC:13397]	-
ENSG00000134755	3487.31	3329.95	3087.47	661.912	822.736	749.955	3301.58	744.868	2.14832	2.46901e-122	3.22664e-120	DSC2	18	31058840	31102522	-	12495	protein_coding	desmocollin 2 [Source:HGNC Symbol;Acc:HGNC:3036]	-
ENSG00000012048	184.197	153.595	193.513	1131.45	1285.23	1284.5	177.102	1233.73	-2.80265	2.88458e-122	3.74616e-120	BRCA1	17	43044295	43170245	-	9187	protein_coding	BRCA1, DNA repair associated [Source:HGNC Symbol;Acc:HGNC:1100]	-
ENSG00000102554	4411.69	4414.33	4137.03	1175.21	1293.68	1313.75	4321.02	1260.88	1.77693	2.93465e-122	3.78752e-120	KLF5	13	73054976	73077542	+	3893	protein_coding	Kruppel like factor 5 [Source:HGNC Symbol;Acc:HGNC:6349]	zf-C2H2
ENSG00000169469	15212.6	11684.5	13990.9	467.715	342.416	534.543	13629.4	448.224	4.92597	3.37673e-122	4.33118e-120	SPRR1B	1	153031202	153032900	+	620	protein_coding	small proline rich protein 1B [Source:HGNC Symbol;Acc:HGNC:11260]	-
ENSG00000093009	45.2017	39.9348	54.6648	743.055	718.604	708.291	46.6004	723.317	-3.95921	3.56861e-122	4.54921e-120	CDC45	22	19479459	19520612	+	2846	protein_coding	cell division cycle 45 [Source:HGNC Symbol;Acc:HGNC:1739]	-
ENSG00000165304	263.3	262.136	296.283	1470.61	1365.91	1443.18	273.906	1426.57	-2.38119	1.27797e-121	1.6192e-119	MELK	9	36572862	36677683	+	3087	protein_coding	maternal embryonic leucine zipper kinase [Source:HGNC Symbol;Acc:HGNC:16870]	-
ENSG00000167325	967.316	1005.54	955.541	3201.06	3198.07	3287.04	976.132	3228.72	-1.72557	1.49904e-121	1.88779e-119	RRM1	11	4094707	4138876	+	4177	protein_coding	ribonucleotide reductase catalytic subunit M1 [Source:HGNC Symbol;Acc:HGNC:10451]	-
ENSG00000276043	333.363	263.16	291.91	1620.13	1531.02	1582.35	296.144	1577.84	-2.41581	2.52593e-121	3.16182e-119	UHRF1	19	4903080	4962154	+	5145	protein_coding	ubiquitin like with PHD and ring finger domains 1 [Source:HGNC Symbol;Acc:HGNC:12556]	-
ENSG00000120708	8004.09	7896.85	8651.25	2646.74	2378.15	2594.7	8184.06	2539.86	1.68793	4.4645e-121	5.55496e-119	TGFBI	5	136028895	136063818	+	7810	protein_coding	transforming growth factor beta induced [Source:HGNC Symbol;Acc:HGNC:11771]	-
ENSG00000157557	4112.22	4034.44	3933.68	1318.35	1217.69	1239.29	4026.78	1258.44	1.67792	9.80203e-121	1.21236e-118	ETS2	21	38805307	38824955	+	4595	protein_coding	ETS proto-oncogene 2, transcription factor [Source:HGNC Symbol;Acc:HGNC:3489]	ETS
ENSG00000090889	64.4124	49.1505	64.5045	765.848	727.048	741.091	59.3558	744.662	-3.6539	7.43896e-120	9.1464e-118	KIF4A	X	70290090	70420832	+	4533	protein_coding	kinesin family member 4A [Source:HGNC Symbol;Acc:HGNC:13339]	-
ENSG00000108854	1475.84	1340.38	1403.79	4515.77	4381.05	4445.66	1406.67	4447.49	-1.66116	7.53123e-120	9.20538e-118	SMURF2	17	64542295	64662068	-	6961	protein_coding	SMAD specific E3 ubiquitin protein ligase 2 [Source:HGNC Symbol;Acc:HGNC:16809]	-
ENSG00000186185	31.6412	33.791	29.519	690.175	676.389	671.059	31.6504	679.208	-4.4218	7.95043e-120	9.66094e-118	KIF18B	17	44924709	44947711	-	4655	protein_coding	kinesin family member 18B [Source:HGNC Symbol;Acc:HGNC:27102]	-
ENSG00000148926	1794.51	1823.69	1524.05	324.574	257.046	277.466	1714.08	286.362	2.58131	1.74329e-119	2.10604e-117	ADM	11	10304680	10307397	+	2718	protein_coding	adrenomedullin [Source:HGNC Symbol;Acc:HGNC:259]	-
ENSG00000087586	152.556	142.332	191.327	1114.13	1119.18	1171.92	162.071	1135.08	-2.80959	3.08993e-119	3.71131e-117	AURKA	20	56369389	56392337	-	2928	protein_coding	aurora kinase A [Source:HGNC Symbol;Acc:HGNC:11393]	-
ENSG00000171680	5094.23	4694.9	5185.5	1608.28	1547.91	1569.06	4991.54	1575.08	1.6639	8.3676e-119	9.99254e-117	PLEKHG5	1	6466092	6520061	-	7053	protein_coding	pleckstrin homology and RhoGEF domain containing G5 [Source:HGNC Symbol;Acc:HGNC:29105]	-
ENSG00000103044	2964.1	2472.89	2799.93	609.944	481.259	529.224	2745.64	540.142	2.34522	1.00339e-118	1.1914e-116	HAS3	16	69105564	69118719	+	5289	protein_coding	hyaluronan synthase 3 [Source:HGNC Symbol;Acc:HGNC:4820]	-
ENSG00000119969	129.955	129.02	139.942	949.105	929.683	924.59	132.972	934.459	-2.81333	1.85156e-118	2.186e-116	HELLS	10	94501434	94613905	+	10148	protein_coding	helicase, lymphoid specific [Source:HGNC Symbol;Acc:HGNC:4861]	-
ENSG00000164379	633.954	635.885	593.66	38.2924	42.2157	33.6859	621.166	38.0647	4.03074	2.20631e-118	2.59011e-116	FOXQ1	6	1312440	1314748	+	2309	protein_coding	forkhead box Q1 [Source:HGNC Symbol;Acc:HGNC:20951]	Fork
ENSG00000198826	186.457	187.386	215.379	1136.92	1319.94	1241.95	196.408	1232.94	-2.65038	7.86434e-118	9.18052e-116	ARHGAP11A	15	32615144	32639949	+	6428	protein_coding	Rho GTPase activating protein 11A [Source:HGNC Symbol;Acc:HGNC:15783]	-
ENSG00000156802	274.6	308.215	309.403	1404.06	1538.53	1499.91	297.406	1480.83	-2.31488	1.31853e-117	1.5306e-115	ATAD2	8	123319850	123416350	-	7118	protein_coding	ATPase family, AAA domain containing 2 [Source:HGNC Symbol;Acc:HGNC:30123]	-
ENSG00000120802	648.644	641.005	627.552	2292.99	2557.33	2504.28	639.067	2451.53	-1.93966	1.71679e-117	1.98185e-115	TMPO	12	98515512	98550379	+	8593	protein_coding	thymopoietin [Source:HGNC Symbol;Acc:HGNC:11875]	-
ENSG00000112742	51.982	46.0786	54.6648	673.764	788.026	704.745	50.9085	722.178	-3.82854	5.71226e-116	6.55774e-114	TTK	6	80003887	80042527	+	4579	protein_coding	TTK protein kinase [Source:HGNC Symbol;Acc:HGNC:12401]	-
ENSG00000065328	36.1614	34.815	48.105	648.236	679.203	697.653	39.6938	675.031	-4.08992	2.12221e-115	2.42294e-113	MCM10	10	13161554	13211104	+	5454	protein_coding	minichromosome maintenance 10 replication initiation factor [Source:HGNC Symbol;Acc:HGNC:18043]	-
ENSG00000169607	44.0717	34.815	61.2246	716.615	697.966	738.431	46.7037	717.671	-3.94695	5.99385e-115	6.8058e-113	CKAP2L	2	112736607	112764677	-	5219	protein_coding	cytoskeleton associated protein 2 like [Source:HGNC Symbol;Acc:HGNC:26877]	-
ENSG00000122966	120.915	71.6779	114.796	956.399	1067.59	1076.18	102.463	1033.39	-3.34064	1.49183e-114	1.68471e-112	CIT	12	119685790	119877291	-	13230	protein_coding	citron rho-interacting serine/threonine kinase [Source:HGNC Symbol;Acc:HGNC:1985]	-
ENSG00000178934	9876.57	11444.9	9264.59	2292.08	1672.68	1959.1	10195.4	1974.62	2.36821	2.89981e-114	3.25704e-112	LGALS7B	19	38789211	38791749	+	644	protein_coding	galectin 7B [Source:HGNC Symbol;Acc:HGNC:34447]	-
ENSG00000101447	70.0626	51.1985	80.9039	847.904	758.944	762.366	67.3883	789.738	-3.55606	3.48891e-113	3.89764e-111	FAM83D	20	38926312	38953106	+	2475	protein_coding	family with sequence similarity 83 member D [Source:HGNC Symbol;Acc:HGNC:16122]	-
ENSG00000187741	72.3227	71.6779	74.3441	716.615	771.139	707.405	72.7816	731.72	-3.32973	2.01531e-112	2.23936e-110	FANCA	16	89737549	89816657	-	9736	protein_coding	FA complementation group A [Source:HGNC Symbol;Acc:HGNC:3582]	-
ENSG00000100100	1482.62	1408.98	1344.75	303.604	322.715	292.536	1412.12	306.285	2.20529	9.05581e-112	1.00091e-109	PIK3IP1	22	31281593	31292534	-	3805	protein_coding	phosphoinositide-3-kinase interacting protein 1 [Source:HGNC Symbol;Acc:HGNC:24942]	-
ENSG00000174564	4886.3	4742	4575.44	1506.17	1357.47	1542.46	4734.58	1468.7	1.68842	2.47008e-111	2.71565e-109	IL20RB	3	136946230	137011085	+	2473	protein_coding	interleukin 20 receptor subunit beta [Source:HGNC Symbol;Acc:HGNC:6004]	-
ENSG00000168078	64.4124	56.3183	59.038	666.471	677.327	717.156	59.9229	686.984	-3.52134	3.21572e-111	3.51682e-109	PBK	8	27809620	27838095	-	2165	protein_coding	PDZ binding kinase [Source:HGNC Symbol;Acc:HGNC:18282]	-
ENSG00000161714	4660.3	4501.37	4756.93	1550.84	1363.1	1470.66	4639.53	1461.53	1.66628	4.4317e-111	4.82127e-109	PLCD3	17	45108967	45133354	-	6740	protein_coding	phospholipase C delta 3 [Source:HGNC Symbol;Acc:HGNC:9061]	-
ENSG00000070814	1116.48	946.148	1069.24	3743.54	3549.87	3694.81	1043.96	3662.74	-1.81171	1.0396e-110	1.12509e-108	TCOF1	5	150357629	150400308	+	11439	protein_coding	treacle ribosome biogenesis factor 1 [Source:HGNC Symbol;Acc:HGNC:11654]	-
ENSG00000188089	604.573	556.015	561.954	17.3228	16.8863	22.1618	574.181	18.7903	4.92999	1.74236e-110	1.87588e-108	PLA2G4E	15	41981582	42051190	-	5823	protein_coding	phospholipase A2 group IVE [Source:HGNC Symbol;Acc:HGNC:24791]	-
ENSG00000146072	5930.46	5323.62	5772.6	1908.24	1885.63	1915.67	5675.56	1903.18	1.57618	1.97896e-110	2.11962e-108	TNFRSF21	6	47231532	47309905	-	3595	protein_coding	TNF receptor superfamily member 21 [Source:HGNC Symbol;Acc:HGNC:13469]	-
ENSG00000104368	107.354	60.4142	89.6503	1015.66	866.828	916.612	85.8062	933.034	-3.45017	3.71685e-110	3.96063e-108	PLAT	8	42175233	42207724	-	6618	protein_coding	plasminogen activator, tissue type [Source:HGNC Symbol;Acc:HGNC:9051]	-
ENSG00000179218	11129.8	9800.41	11641.4	36513.6	33128	34969.5	10857.2	34870.4	-1.68344	6.35972e-110	6.74228e-108	CALR	19	12938578	12944489	+	2714	protein_coding	calreticulin [Source:HGNC Symbol;Acc:HGNC:1455]	-
ENSG00000059804	2298.51	2491.32	2359.33	644.589	654.812	702.972	2383.05	667.458	1.83602	1.04561e-109	1.10288e-107	SLC2A3	12	7919230	7936275	-	6159	protein_coding	solute carrier family 2 member 3 [Source:HGNC Symbol;Acc:HGNC:11007]	-
ENSG00000182580	863.353	757.737	767.494	104.848	77.8644	90.4201	796.195	91.0443	3.12707	1.70304e-109	1.78725e-107	EPHB3	3	184561784	184582409	+	4532	protein_coding	EPH receptor B3 [Source:HGNC Symbol;Acc:HGNC:3394]	-
ENSG00000147394	3685.07	3123.11	3236.16	935.429	901.539	882.04	3348.11	906.336	1.88503	3.57471e-109	3.73261e-107	ZNF185	X	152914442	152973480	+	4812	protein_coding	zinc finger protein 185 with LIM domain [Source:HGNC Symbol;Acc:HGNC:12976]	-
ENSG00000134690	79.103	94.2052	95.1167	769.495	776.768	746.409	89.475	764.224	-3.09219	4.78749e-109	4.97397e-107	CDCA8	1	37692418	37709719	+	2469	protein_coding	cell division cycle associated 8 [Source:HGNC Symbol;Acc:HGNC:14629]	-
ENSG00000221869	3347.19	4153.22	2966.11	679.235	586.329	611.666	3488.84	625.743	2.47926	1.1037e-108	1.14098e-106	CEBPD	8	47736909	47739086	-	2178	protein_coding	CCAAT enhancer binding protein delta [Source:HGNC Symbol;Acc:HGNC:1835]	C/EBP
ENSG00000196562	4811.72	4355.97	4884.85	1483.38	1411.88	1514.98	4684.18	1470.08	1.67161	1.32948e-108	1.36759e-106	SULF2	20	47656348	47786616	-	6657	protein_coding	sulfatase 2 [Source:HGNC Symbol;Acc:HGNC:20392]	-
ENSG00000114315	897.254	953.316	771.867	113.054	92.8745	112.582	874.145	106.17	3.04054	4.70793e-108	4.81901e-106	HES1	3	194136145	194138732	+	2062	protein_coding	hes family bHLH transcription factor 1 [Source:HGNC Symbol;Acc:HGNC:5192]	bHLH
ENSG00000134294	15247.7	16142.9	14933.3	5425.67	5766.66	5878.2	15441.3	5690.18	1.44027	1.61942e-107	1.6495e-105	SLC38A2	12	46358189	46372867	-	6602	protein_coding	solute carrier family 38 member 2 [Source:HGNC Symbol;Acc:HGNC:13448]	-
ENSG00000108106	456.537	573.423	495.263	3191.04	2497.29	2581.41	508.408	2756.58	-2.43761	1.72203e-107	1.74547e-105	UBE2S	19	55399745	55407777	-	2788	protein_coding	ubiquitin conjugating enzyme E2 S [Source:HGNC Symbol;Acc:HGNC:17895]	-
ENSG00000135919	10606.6	10702.5	11373.6	3963.27	3860.39	4178.83	10894.2	4000.83	1.44511	2.71447e-106	2.73806e-104	SERPINE2	2	223975112	224039319	-	8891	protein_coding	serpin family E member 2 [Source:HGNC Symbol;Acc:HGNC:8951]	-
ENSG00000169035	775.209	632.813	641.765	51.0566	39.4013	62.053	683.262	50.837	3.74424	5.2717e-106	5.29182e-104	KLK7	19	50976482	50984099	-	2434	protein_coding	kallikrein related peptidase 7 [Source:HGNC Symbol;Acc:HGNC:6368]	-
ENSG00000197956	47902.5	62905.5	48068.9	12356.6	9820.3	10598.7	52959	10925.2	2.27723	5.90124e-106	5.89528e-104	S100A6	1	153534599	153536244	-	971	protein_coding	S100 calcium binding protein A6 [Source:HGNC Symbol;Acc:HGNC:10496]	-
ENSG00000013297	40.6815	55.2944	54.6648	630.002	636.987	632.941	50.2136	633.31	-3.65236	2.75372e-105	2.73778e-103	CLDN11	3	170418865	170454733	+	3732	protein_coding	claudin 11 [Source:HGNC Symbol;Acc:HGNC:8514]	-
ENSG00000124795	1029.47	1114.08	983.966	3427.17	3968.27	3732.05	1042.5	3709.16	-1.83055	1.17891e-104	1.16651e-102	DEK	6	18223868	18264823	-	4361	protein_coding	DEK proto-oncogene [Source:HGNC Symbol;Acc:HGNC:2768]	-
ENSG00000068489	142.385	100.349	161.808	1012.01	1129.5	1048.7	134.847	1063.4	-2.98336	8.60419e-104	8.47329e-102	PRR11	17	59155499	59204705	+	4080	protein_coding	proline rich 11 [Source:HGNC Symbol;Acc:HGNC:25619]	-
ENSG00000073111	248.609	261.112	249.271	1141.48	1225.19	1229.54	252.998	1198.74	-2.24375	1.75184e-103	1.71706e-101	MCM2	3	127598223	127622436	+	4902	protein_coding	minichromosome maintenance complex component 2 [Source:HGNC Symbol;Acc:HGNC:6944]	-
ENSG00000167670	315.282	260.088	276.604	1370.32	1319.94	1313.75	283.991	1334.67	-2.23437	1.76215e-103	1.71904e-101	CHAF1A	19	4402662	4445018	+	4299	protein_coding	chromatin assembly factor 1 subunit A [Source:HGNC Symbol;Acc:HGNC:1910]	-
ENSG00000186871	47.4618	30.7191	39.3586	589.886	615.411	600.141	39.1798	601.813	-3.94869	3.00264e-103	2.91551e-101	ERCC6L	X	72204657	72239047	-	4364	protein_coding	ERCC excision repair 6 like, spindle assembly checkpoint helicase [Source:HGNC Symbol;Acc:HGNC:20794]	-
ENSG00000064115	3027.38	2994.09	2978.14	959.134	998.166	1030.08	2999.87	995.793	1.59087	5.73819e-103	5.54576e-101	TM7SF3	12	26973195	27014434	-	3888	protein_coding	transmembrane 7 superfamily member 3 [Source:HGNC Symbol;Acc:HGNC:23049]	-
ENSG00000144554	120.915	97.2771	156.341	939.988	996.29	997.281	124.844	977.853	-2.97266	2.33004e-102	2.24148e-100	FANCD2	3	10026414	10101930	+	8378	protein_coding	FA complementation group D2 [Source:HGNC Symbol;Acc:HGNC:3585]	-
ENSG00000146674	681.416	632.813	573.98	65.6442	46.9063	50.5289	629.403	54.3598	3.53264	9.23152e-102	8.83971e-100	IGFBP3	7	45912245	45921874	-	4571	protein_coding	insulin like growth factor binding protein 3 [Source:HGNC Symbol;Acc:HGNC:5472]	-
ENSG00000225190	2756.17	2558.9	2899.42	818.728	747.686	811.122	2738.16	792.512	1.78829	1.76259e-101	1.68004e-99	PLEKHM1	17	45435900	45490749	-	9233	protein_coding	pleckstrin homology and RUN domain containing M1 [Source:HGNC Symbol;Acc:HGNC:29017]	-
ENSG00000132274	2205.84	2051.01	2210.64	587.15	634.173	548.726	2155.83	590.017	1.86973	4.79953e-101	4.55386e-99	TRIM22	11	5689689	5737089	+	6020	protein_coding	tripartite motif containing 22 [Source:HGNC Symbol;Acc:HGNC:16379]	-
ENSG00000176845	751.478	959.459	583.82	46.4979	37.525	35.4589	764.919	39.8273	4.26451	1.6613e-100	1.5691e-98	METRNL	17	83079691	83095119	+	2626	protein_coding	meteorin like, glial cell differentiation regulator [Source:HGNC Symbol;Acc:HGNC:27584]	-
ENSG00000080986	38.4214	57.3423	39.3586	589.886	606.029	639.146	45.0408	611.687	-3.75584	6.45065e-100	6.06507e-98	NDC80	18	2571511	2616635	+	3600	protein_coding	NDC80, kinetochore complex component [Source:HGNC Symbol;Acc:HGNC:16909]	-
ENSG00000135476	73.4528	54.2704	81.9972	657.353	699.842	718.042	69.9068	691.746	-3.31173	3.03464e-99	2.84039e-97	ESPL1	12	53268299	53293643	+	8890	protein_coding	extra spindle pole bodies like 1, separase [Source:HGNC Symbol;Acc:HGNC:16856]	-
ENSG00000271447	497.219	532.464	504.009	34.6455	32.8344	37.2318	511.231	34.9039	3.87158	3.38688e-99	3.15587e-97	MMP28	17	35756249	35795707	-	2858	protein_coding	matrix metallopeptidase 28 [Source:HGNC Symbol;Acc:HGNC:14366]	-
ENSG00000174640	692.716	595.95	731.415	73.8497	74.1119	58.5071	673.36	68.8229	3.29161	7.46204e-99	6.92204e-97	SLCO2A1	3	133928145	134052184	-	9834	protein_coding	solute carrier organic anion transporter family member 2A1 [Source:HGNC Symbol;Acc:HGNC:10955]	-
ENSG00000178695	901.774	826.343	862.61	2789.88	3094.88	2775.54	863.576	2886.77	-1.74143	1.14258e-98	1.05519e-96	KCTD12	13	76880166	76886390	-	6225	protein_coding	potassium channel tetramerization domain containing 12 [Source:HGNC Symbol;Acc:HGNC:14678]	-
ENSG00000130816	1495.05	1231.84	1525.15	5225.09	4810.71	5078.6	1417.34	5038.13	-1.83039	1.31131e-98	1.20565e-96	DNMT1	19	10133345	10231286	-	9796	protein_coding	DNA methyltransferase 1 [Source:HGNC Symbol;Acc:HGNC:2976]	-
ENSG00000069188	1432.89	1158.11	1364.43	199.668	232.655	257.077	1318.48	229.8	2.51947	5.92062e-98	5.41958e-96	SDK2	17	73334384	73644089	-	11607	protein_coding	sidekick cell adhesion molecule 2 [Source:HGNC Symbol;Acc:HGNC:19308]	-
ENSG00000142731	84.7532	62.4621	91.8368	680.146	756.129	799.598	79.6841	745.291	-3.23012	1.05165e-97	9.58434e-96	PLK4	4	127880861	127899195	+	4482	protein_coding	polo like kinase 4 [Source:HGNC Symbol;Acc:HGNC:11397]	-
ENSG00000186847	260931	276566	233911	86108.7	71919.5	77540.6	257136	78522.9	1.71134	1.22582e-97	1.11228e-95	KRT14	17	41582279	41586921	-	2281	protein_coding	keratin 14 [Source:HGNC Symbol;Acc:HGNC:6416]	-
ENSG00000137193	2768.6	2769.84	2248.91	639.119	629.482	659.535	2595.78	642.712	2.01387	1.45523e-97	1.31471e-95	PIM1	6	37170203	37175426	+	2977	protein_coding	Pim-1 proto-oncogene, serine/threonine kinase [Source:HGNC Symbol;Acc:HGNC:8986]	-
ENSG00000112984	58.7622	27.6472	54.6648	757.643	628.544	696.767	47.0247	694.318	-3.89525	2.49834e-97	2.24731e-95	KIF20A	5	138178719	138187715	+	3958	protein_coding	kinesin family member 20A [Source:HGNC Symbol;Acc:HGNC:9787]	-
ENSG00000075223	10606.6	10837.7	10432.2	3617.72	4135.26	3934.16	10625.5	3895.71	1.44764	3.698e-97	3.3121e-95	SEMA3C	7	80742538	80922359	-	6268	protein_coding	semaphorin 3C [Source:HGNC Symbol;Acc:HGNC:10725]	-
ENSG00000155252	3697.5	3601.3	3559.77	1312.88	1233.64	1311.09	3619.52	1285.87	1.49286	5.05783e-97	4.51059e-95	PI4K2A	10	97640686	97676434	+	4189	protein_coding	phosphatidylinositol 4-kinase type 2 alpha [Source:HGNC Symbol;Acc:HGNC:30031]	-
ENSG00000165272	1184.28	1032.16	950.074	195.109	167.925	181.727	1055.51	181.587	2.53848	7.34187e-96	6.51952e-94	AQP3	9	33441154	33447633	-	2950	protein_coding	aquaporin 3 (Gill blood group) [Source:HGNC Symbol;Acc:HGNC:636]	-
ENSG00000092853	31.6412	24.5753	31.7056	506.007	556.309	577.98	29.3073	546.765	-4.22664	1.05275e-95	9.30859e-94	CLSPN	1	35720218	35769967	-	5411	protein_coding	claspin [Source:HGNC Symbol;Acc:HGNC:19715]	-
ENSG00000134824	1438.54	1089.5	1458.46	6300.02	5321.05	5805.5	1328.83	5808.86	-2.12882	5.39602e-95	4.75102e-93	FADS2	11	61792980	61867354	+	11026	protein_coding	fatty acid desaturase 2 [Source:HGNC Symbol;Acc:HGNC:3575]	-
ENSG00000139618	50.8519	47.1026	61.2246	551.593	661.379	659.535	53.0597	624.169	-3.55816	1.42478e-94	1.24917e-92	BRCA2	13	32315474	32400266	+	12273	protein_coding	BRCA2, DNA repair associated [Source:HGNC Symbol;Acc:HGNC:1101]	-
ENSG00000151503	420.376	358.389	432.945	1581.84	1659.54	1602.74	403.903	1614.71	-2.00057	2.60577e-94	2.27502e-92	NCAPD3	11	134150119	134225454	-	9114	protein_coding	non-SMC condensin II complex subunit D3 [Source:HGNC Symbol;Acc:HGNC:28952]	-
ENSG00000164045	70.0626	69.6299	97.3033	688.352	709.223	663.081	78.9986	686.885	-3.12124	3.21156e-94	2.79217e-92	CDC25A	3	48157146	48188402	-	4117	protein_coding	cell division cycle 25A [Source:HGNC Symbol;Acc:HGNC:1725]	-
ENSG00000167757	566.151	487.409	548.835	49.2331	40.3394	46.0965	534.132	45.223	3.56033	4.598e-94	3.98091e-92	KLK11	19	51022216	51028039	-	3113	protein_coding	kallikrein related peptidase 11 [Source:HGNC Symbol;Acc:HGNC:6359]	-
ENSG00000075702	58.7622	45.0547	53.5715	555.24	592.896	584.185	52.4628	577.44	-3.46467	4.82867e-94	4.16327e-92	WDR62	19	36054881	36105106	+	9812	protein_coding	WD repeat domain 62 [Source:HGNC Symbol;Acc:HGNC:24502]	-
ENSG00000166165	1699.58	1740.75	1670.56	486.861	397.765	438.804	1703.63	441.143	1.949	9.59507e-94	8.23868e-92	CKB	14	103519659	103523111	-	2669	protein_coding	creatine kinase B [Source:HGNC Symbol;Acc:HGNC:1991]	-
ENSG00000133710	539.03	438.259	481.05	21.8814	23.4531	21.2753	486.113	22.2033	4.45273	1.17063e-93	1.00101e-91	SPINK5	5	148025683	148137289	+	4381	protein_coding	serine peptidase inhibitor, Kazal type 5 [Source:HGNC Symbol;Acc:HGNC:15464]	-
ENSG00000203722	459.927	502.769	489.797	28.2635	33.7725	36.3453	484.164	32.7938	3.88358	1.6942e-93	1.44278e-91	RAET1G	6	149916878	149923121	-	1486	protein_coding	retinoic acid early transcript 1G [Source:HGNC Symbol;Acc:HGNC:16795]	-
ENSG00000143799	1456.62	1267.67	1497.82	4284.19	4265.66	4421.72	1407.37	4323.86	-1.61992	6.39211e-93	5.42129e-91	PARP1	1	226360691	226408079	-	7169	protein_coding	poly(ADP-ribose) polymerase 1 [Source:HGNC Symbol;Acc:HGNC:270]	Others
ENSG00000109182	480.268	487.409	437.318	28.2635	26.2675	26.5942	468.332	27.0417	4.11429	6.4811e-93	5.47442e-91	CWH43	4	48986247	49062081	+	3138	protein_coding	cell wall biogenesis 43 C-terminal homolog [Source:HGNC Symbol;Acc:HGNC:26133]	-
ENSG00000136492	58.7622	57.3423	61.2246	550.682	591.957	598.369	59.1097	580.336	-3.29602	3.28898e-92	2.76687e-90	BRIP1	17	61681266	61863521	-	7991	protein_coding	BRCA1 interacting protein C-terminal helicase 1 [Source:HGNC Symbol;Acc:HGNC:20473]	-
ENSG00000151725	96.0536	110.589	90.7436	686.528	697.966	723.361	99.1286	702.618	-2.82302	3.76686e-92	3.15611e-90	CENPU	4	184694618	184734133	-	2953	protein_coding	centromere protein U [Source:HGNC Symbol;Acc:HGNC:21348]	-
ENSG00000138668	2266.87	2131.9	2142.86	5829.57	5691.61	5497.01	2180.54	5672.73	-1.37952	4.18513e-92	3.49248e-90	HNRNPD	4	82352498	82374503	-	6981	protein_coding	heterogeneous nuclear ribonucleoprotein D [Source:HGNC Symbol;Acc:HGNC:5036]	-
ENSG00000167996	14246.4	13655.7	15359.7	4946.1	4136.2	4020.15	14420.6	4367.48	1.72325	4.33598e-92	3.60389e-90	FTH1	11	61959718	61967660	-	2030	protein_coding	ferritin heavy chain 1 [Source:HGNC Symbol;Acc:HGNC:3976]	-
ENSG00000108244	652.035	666.604	577.26	8.20552	6.56688	7.97825	631.966	7.58355	6.37867	9.80241e-92	8.11491e-90	KRT23	17	40922696	40937634	-	2902	protein_coding	keratin 23 [Source:HGNC Symbol;Acc:HGNC:6438]	-
ENSG00000228716	68.9326	80.8936	85.2771	645.501	647.307	615.211	78.3678	636.006	-3.01879	1.99191e-91	1.64246e-89	DHFR	5	80626228	80654983	-	4409	protein_coding	dihydrofolate reductase [Source:HGNC Symbol;Acc:HGNC:2861]	-
ENSG00000127586	267.82	200.698	265.671	1708.57	1353.72	1355.42	244.73	1472.57	-2.59137	2.12285e-90	1.74351e-88	CHTF18	16	788046	800737	+	5916	protein_coding	chromosome transmission fidelity factor 18 [Source:HGNC Symbol;Acc:HGNC:18435]	-
ENSG00000107731	642.994	637.933	627.552	98.4662	75.0501	85.9878	636.16	86.5014	2.87762	2.17082e-90	1.77588e-88	UNC5B	10	71212570	71302864	+	6841	protein_coding	unc-5 netrin receptor B [Source:HGNC Symbol;Acc:HGNC:12568]	-
ENSG00000182541	4154.04	4084.61	3838.56	1516.2	1461.6	1494.59	4025.74	1490.8	1.43312	2.46888e-90	2.0118e-88	LIMK2	22	31212239	31280080	+	6170	protein_coding	LIM domain kinase 2 [Source:HGNC Symbol;Acc:HGNC:6614]	-
ENSG00000164938	1490.53	1474.52	1368.81	258.93	338.663	336.859	1444.62	311.484	2.2135	4.31138e-90	3.49946e-88	TP53INP1	8	94925972	94949411	-	5676	protein_coding	tumor protein p53 inducible nuclear protein 1 [Source:HGNC Symbol;Acc:HGNC:18022]	-
ENSG00000160691	19481.9	17330.7	20359.4	7116.01	6648.5	6821.4	19057.3	6861.97	1.47359	6.88199e-90	5.56423e-88	SHC1	1	154962298	154974395	-	4342	protein_coding	SHC adaptor protein 1 [Source:HGNC Symbol;Acc:HGNC:10840]	-
ENSG00000143382	865.613	758.761	852.771	149.523	152.915	132.084	825.715	144.841	2.51158	9.02528e-90	7.26885e-88	ADAMTSL4	1	150549369	150560937	+	6432	protein_coding	ADAMTS like 4 [Source:HGNC Symbol;Acc:HGNC:19706]	-
ENSG00000177084	441.847	450.547	509.476	1733.19	1759.92	1633.77	467.29	1708.96	-1.87071	1.1e-89	8.82509e-88	POLE	12	132623753	132687365	-	16609	protein_coding	DNA polymerase epsilon, catalytic subunit [Source:HGNC Symbol;Acc:HGNC:9177]	-
ENSG00000169174	2934.72	2369.47	2755.11	8999.63	8205.79	8430.35	2686.43	8545.26	-1.66985	1.30721e-89	1.04471e-87	PCSK9	1	55039548	55064852	+	4981	protein_coding	proprotein convertase subtilisin/kexin type 9 [Source:HGNC Symbol;Acc:HGNC:20001]	-
ENSG00000186081	381993	360048	365395	155359	135696	146660	369145	145905	1.33916	1.00894e-88	8.0325e-87	KRT5	12	52514575	52520687	-	4292	protein_coding	keratin 5 [Source:HGNC Symbol;Acc:HGNC:6442]	-
ENSG00000128228	396.645	410.612	337.828	2129.79	1721.46	1683.41	381.695	1844.89	-2.27256	1.01761e-88	8.07059e-87	SDF2L1	22	21642261	21644298	+	1099	protein_coding	stromal cell derived factor 2 like 1 [Source:HGNC Symbol;Acc:HGNC:10676]	-
ENSG00000149485	527.73	438.259	553.208	1999.41	1890.32	2114.24	506.399	2001.32	-1.98403	1.10374e-88	8.72038e-87	FADS1	11	61799625	61829318	-	10230	protein_coding	fatty acid desaturase 1 [Source:HGNC Symbol;Acc:HGNC:3574]	-
ENSG00000189057	23.7309	45.0547	32.7989	520.595	521.598	518.586	33.8615	520.26	-3.93032	1.44403e-88	1.13657e-86	FAM111B	11	59107185	59127410	+	3863	protein_coding	family with sequence similarity 111 member B [Source:HGNC Symbol;Acc:HGNC:24200]	-
ENSG00000101003	215.838	225.273	163.994	1106.83	1314.31	1107.2	201.702	1176.12	-2.54257	2.02193e-88	1.58542e-86	GINS1	20	25407727	25452628	+	4068	protein_coding	GINS complex subunit 1 [Source:HGNC Symbol;Acc:HGNC:28980]	-
ENSG00000197632	9444.9	11406	8646.88	2582	2853.78	2545.06	9832.59	2660.28	1.88617	2.0548e-88	1.60514e-86	SERPINB2	18	63871692	63903890	+	2748	protein_coding	serpin family B member 2 [Source:HGNC Symbol;Acc:HGNC:8584]	-
ENSG00000135925	905.164	699.371	795.919	103.937	98.5032	125.879	800.152	109.44	2.86789	3.82326e-88	2.97541e-86	WNT10A	2	218880363	218899581	+	3412	protein_coding	Wnt family member 10A [Source:HGNC Symbol;Acc:HGNC:13829]	-
ENSG00000118898	4025.21	3443.61	3511.67	1077.66	1107.93	1202.94	3660.16	1129.51	1.69584	6.47033e-88	5.01668e-86	PPL	16	4882507	4960741	-	7686	protein_coding	periplakin [Source:HGNC Symbol;Acc:HGNC:9273]	-
ENSG00000174371	23.7309	38.9108	36.0788	533.359	481.259	516.813	32.9068	510.477	-3.94796	6.7269e-88	5.19622e-86	EXO1	1	241847967	241895148	+	4140	protein_coding	exonuclease 1 [Source:HGNC Symbol;Acc:HGNC:3511]	-
ENSG00000151632	692.716	812.008	666.91	85.7021	98.5032	111.695	723.878	98.6336	2.87531	7.83931e-88	6.03308e-86	AKR1C2	10	4987400	5018031	-	6461	protein_coding	aldo-keto reductase family 1 member C2 [Source:HGNC Symbol;Acc:HGNC:385]	-
ENSG00000154839	38.4214	41.9827	36.0788	475.008	539.422	518.586	38.8277	511.006	-3.71611	1.64104e-87	1.25827e-85	SKA1	18	50374995	50394173	+	2950	protein_coding	spindle and kinetochore associated complex subunit 1 [Source:HGNC Symbol;Acc:HGNC:28109]	-
ENSG00000049541	221.488	201.722	183.674	986.486	974.713	938.774	202.295	966.657	-2.25722	3.11547e-87	2.38002e-85	RFC2	7	74231499	74254458	-	2211	protein_coding	replication factor C subunit 2 [Source:HGNC Symbol;Acc:HGNC:9970]	-
ENSG00000197299	41.8116	58.3663	42.6385	552.505	565.69	511.494	47.6055	543.23	-3.50598	3.74331e-87	2.84916e-85	BLM	15	90717327	90816165	+	6674	protein_coding	Bloom syndrome RecQ like helicase [Source:HGNC Symbol;Acc:HGNC:1058]	-
ENSG00000089280	2395.69	2469.81	2480.69	6451.36	5939.27	6130.84	2448.73	6173.83	-1.33407	3.8891e-87	2.94933e-85	FUS	16	31180110	31194871	+	10283	protein_coding	FUS RNA binding protein [Source:HGNC Symbol;Acc:HGNC:4010]	-
ENSG00000165480	44.0717	17.4075	27.3324	580.768	527.227	514.154	29.6038	540.716	-4.20633	5.20186e-87	3.93053e-85	SKA3	13	21153595	21176602	-	3048	protein_coding	spindle and kinetochore associated complex subunit 3 [Source:HGNC Symbol;Acc:HGNC:20262]	-
ENSG00000149428	2934.72	2511.8	2965.02	8722.47	8020.04	8076.65	2803.85	8273.05	-1.56135	5.92987e-87	4.46438e-85	HYOU1	11	119044189	119057202	-	7694	protein_coding	hypoxia up-regulated 1 [Source:HGNC Symbol;Acc:HGNC:16931]	-
ENSG00000117519	803.46	740.33	769.68	2251.96	2285.27	2311.92	771.157	2283.05	-1.56642	1.4463e-86	1.08493e-84	CNN3	1	94896949	94927278	-	2838	protein_coding	calponin 3 [Source:HGNC Symbol;Acc:HGNC:2157]	-
ENSG00000135451	27.121	24.5753	31.7056	516.036	481.259	454.76	27.8006	484.018	-4.12434	3.60229e-86	2.69252e-84	TROAP	12	49323236	49331731	+	3954	protein_coding	trophinin associated protein [Source:HGNC Symbol;Acc:HGNC:12327]	-
ENSG00000165490	36.1614	39.9348	36.0788	489.596	514.093	468.057	37.3916	490.582	-3.71155	1.1681e-85	8.69962e-84	DDIAS	11	82899975	82958277	+	5339	protein_coding	DNA damage induced apoptosis suppressor [Source:HGNC Symbol;Acc:HGNC:26351]	-
ENSG00000160957	198.887	153.595	185.86	1140.57	940.94	978.665	179.448	1020.06	-2.50969	1.82249e-85	1.35249e-83	RECQL4	8	144511288	144517845	-	4236	protein_coding	RecQ like helicase 4 [Source:HGNC Symbol;Acc:HGNC:9949]	-
ENSG00000187091	1795.64	1696.72	1719.75	537.917	515.969	562.023	1737.37	538.637	1.68902	2.3694e-85	1.75209e-83	PLCD1	3	38007496	38029762	-	4314	protein_coding	phospholipase C delta 1 [Source:HGNC Symbol;Acc:HGNC:9060]	-
ENSG00000135926	14080.3	13195.9	13816	5712.86	5106.22	5568.82	13697.4	5462.63	1.32614	2.71691e-85	2.00194e-83	TMBIM1	2	218274192	218292586	-	5098	protein_coding	transmembrane BAX inhibitor motif containing 1 [Source:HGNC Symbol;Acc:HGNC:23410]	-
ENSG00000185909	1125.52	1282.01	1102.04	281.723	235.47	233.142	1169.86	250.112	2.22614	2.97478e-85	2.1842e-83	KLHDC8B	3	49171611	49176486	+	2158	protein_coding	kelch domain containing 8B [Source:HGNC Symbol;Acc:HGNC:28557]	-
ENSG00000124766	2249.91	2125.76	2044.46	616.326	673.574	698.54	2140.05	662.813	1.69074	3.23658e-85	2.36806e-83	SOX4	6	21592768	21598619	+	5852	protein_coding	SRY-box 4 [Source:HGNC Symbol;Acc:HGNC:11200]	HMG
ENSG00000137266	1058.85	958.435	1107.51	229.755	197.006	234.915	1041.6	220.559	2.23832	4.28709e-85	3.12566e-83	SLC22A23	6	3268962	3457022	-	8898	protein_coding	solute carrier family 22 member 23 [Source:HGNC Symbol;Acc:HGNC:21106]	-
ENSG00000051341	64.4124	30.7191	59.038	570.739	651.059	698.54	51.3898	640.113	-3.64901	6.42689e-85	4.66939e-83	POLQ	3	121431427	121546641	-	9400	protein_coding	DNA polymerase theta [Source:HGNC Symbol;Acc:HGNC:9186]	-
ENSG00000133119	151.426	150.524	136.662	758.555	864.014	785.414	146.204	802.661	-2.45645	9.86083e-84	7.13931e-82	RFC3	13	33818049	33966558	+	2874	protein_coding	replication factor C subunit 3 [Source:HGNC Symbol;Acc:HGNC:9971]	-
ENSG00000170454	971.837	751.594	813.412	141.317	102.256	102.831	845.614	115.468	2.87187	1.15817e-83	8.35608e-82	KRT75	12	52424070	52434525	-	2324	protein_coding	keratin 75 [Source:HGNC Symbol;Acc:HGNC:24431]	-
ENSG00000159788	2797.99	2726.83	2657.8	1020.22	939.064	979.551	2727.54	979.612	1.47716	1.63391e-83	1.17477e-81	RGS12	4	3293028	3439913	+	13755	protein_coding	regulator of G protein signaling 12 [Source:HGNC Symbol;Acc:HGNC:9994]	-
ENSG00000163220	8143.09	9549.54	6830.91	572.563	448.424	642.692	8174.51	554.56	3.88148	2.20096e-83	1.57703e-81	S100A9	1	153357854	153361027	+	577	protein_coding	S100 calcium binding protein A9 [Source:HGNC Symbol;Acc:HGNC:10499]	-
ENSG00000135924	2558.42	2501.56	2440.24	917.195	831.18	867.856	2500.07	872.077	1.51928	2.78395e-83	1.98392e-81	DNAJB2	2	219279267	219286900	+	5886	protein_coding	DnaJ heat shock protein family (Hsp40) member B2 [Source:HGNC Symbol;Acc:HGNC:5228]	-
ENSG00000101412	57.6322	44.0307	43.7318	535.182	522.536	488.446	48.4649	515.388	-3.41454	2.78793e-83	1.98392e-81	E2F1	20	33675683	33686404	-	2503	protein_coding	E2F transcription factor 1 [Source:HGNC Symbol;Acc:HGNC:3113]	E2F
ENSG00000130203	10571.5	13393.5	9448.26	2775.29	2143.62	2316.35	11137.8	2411.75	2.20734	3.13943e-83	2.22643e-81	APOE	19	44905754	44909393	+	2191	protein_coding	apolipoprotein E [Source:HGNC Symbol;Acc:HGNC:613]	-
ENSG00000120539	194.367	169.979	197.887	910.813	888.405	867.856	187.411	889.025	-2.24765	4.87562e-83	3.44593e-81	MASTL	10	27154824	27186924	+	3631	protein_coding	microtubule associated serine/threonine kinase like [Source:HGNC Symbol;Acc:HGNC:19042]	-
ENSG00000276600	1204.63	1214.43	1193.88	327.309	266.428	310.265	1204.31	301.334	1.99812	8.60358e-83	6.06013e-81	RAB7B	1	205976740	206003461	-	3686	protein_coding	RAB7B, member RAS oncogene family [Source:HGNC Symbol;Acc:HGNC:30513]	-
ENSG00000143669	1394.47	1363.93	1452.99	358.308	387.446	418.415	1403.8	388.056	1.85456	1.07096e-82	7.5181e-81	LYST	1	235661041	235883640	-	19614	protein_coding	lysosomal trafficking regulator [Source:HGNC Symbol;Acc:HGNC:1968]	-
ENSG00000161800	545.811	501.745	502.916	1713.13	1625.77	1746.35	516.824	1695.08	-1.7143	1.20261e-82	8.41381e-81	RACGAP1	12	49976923	50033136	-	4487	protein_coding	Rac GTPase activating protein 1 [Source:HGNC Symbol;Acc:HGNC:9804]	-
ENSG00000132646	902.904	933.86	921.648	2545.53	2468.21	2576.09	919.471	2529.94	-1.46008	2.03248e-82	1.41721e-80	PCNA	20	5114953	5126626	-	1471	protein_coding	proliferating cell nuclear antigen [Source:HGNC Symbol;Acc:HGNC:8729]	-
ENSG00000167601	2194.54	1819.59	2240.16	6323.72	6234.78	6220.37	2084.77	6259.63	-1.58668	2.24713e-82	1.56165e-80	AXL	19	41219203	41261766	+	5154	protein_coding	AXL receptor tyrosine kinase [Source:HGNC Symbol;Acc:HGNC:905]	-
ENSG00000142192	50521.9	47835.8	50604.3	21578.7	21878	23015.5	49654	22157.4	1.1641	3.97238e-82	2.7514e-80	APP	21	25880550	26171128	-	6316	protein_coding	amyloid beta precursor protein [Source:HGNC Symbol;Acc:HGNC:620]	-
ENSG00000013573	220.358	231.417	285.35	1155.15	1086.35	1096.57	245.709	1112.69	-2.17912	1.24815e-81	8.61637e-80	DDX11	12	31073845	31104791	+	8374	protein_coding	DEAD/H-box helicase 11 [Source:HGNC Symbol;Acc:HGNC:2736]	-
ENSG00000275993	787.64	779.241	751.094	162.287	127.585	121.447	772.658	137.106	2.49479	2.15829e-81	1.485e-79	SIK1B	21	6111134	6123739	+	4806	protein_coding	salt inducible kinase 1B (putative) [Source:HGNC Symbol;Acc:HGNC:52389]	-
ENSG00000182795	5141.69	4522.87	5286.09	1782.42	1718.65	1804.86	4983.55	1768.64	1.49429	2.58333e-81	1.77159e-79	C1orf116	1	207018521	207032756	-	5502	protein_coding	chromosome 1 open reading frame 116 [Source:HGNC Symbol;Acc:HGNC:28667]	-
ENSG00000164104	404.555	476.146	412.173	1643.84	1485.05	1632.88	430.958	1587.26	-1.8797	4.04659e-81	2.76592e-79	HMGB2	4	173331695	173335125	-	2775	protein_coding	high mobility group box 2 [Source:HGNC Symbol;Acc:HGNC:5000]	HMG
ENSG00000184445	228.269	277.496	277.697	1081.31	1214.87	1130.25	261.154	1142.14	-2.12711	4.36266e-81	2.97219e-79	KNTC1	12	122527246	122626396	+	11325	protein_coding	kinetochore associated 1 [Source:HGNC Symbol;Acc:HGNC:17255]	-
ENSG00000051108	1810.33	1829.83	1937.32	5826.83	4992.71	5106.08	1859.16	5308.54	-1.51368	7.30629e-81	4.96135e-79	HERPUD1	16	56932048	56944863	+	5155	protein_coding	homocysteine inducible ER protein with ubiquitin like domain 1 [Source:HGNC Symbol;Acc:HGNC:13744]	-
ENSG00000111799	723.227	622.573	797.013	2393.28	2686.79	2740.97	714.271	2607.01	-1.86871	1.22616e-80	8.29914e-79	COL12A1	6	75084326	75206051	-	12481	protein_coding	collagen type XII alpha 1 chain [Source:HGNC Symbol;Acc:HGNC:2188]	-
ENSG00000109846	473.488	551.92	403.426	29.1752	22.515	37.2318	476.278	29.6407	4.00231	1.57239e-80	1.0608e-78	CRYAB	11	111908565	111923722	-	3034	protein_coding	crystallin alpha B [Source:HGNC Symbol;Acc:HGNC:2389]	-
ENSG00000243137	1337.97	1513.43	1556.85	360.131	345.23	413.096	1469.42	372.819	1.97825	1.90032e-80	1.27789e-78	PSG4	19	43192702	43207299	-	6274	protein_coding	pregnancy specific beta-1-glycoprotein 4 [Source:HGNC Symbol;Acc:HGNC:9521]	-
ENSG00000163507	53.112	53.2464	65.5977	500.537	543.175	513.267	57.3187	518.993	-3.17924	3.21136e-80	2.15254e-78	CIP2A	3	108549869	108589644	-	4579	protein_coding	cell proliferation regulating inhibitor of protein phosphatase 2A [Source:HGNC Symbol;Acc:HGNC:29302]	-
ENSG00000137962	2733.57	2734	2712.47	6126.79	6292.01	6273.56	2726.68	6230.79	-1.19226	3.87153e-80	2.5867e-78	ARHGAP29	1	94148988	94275068	-	15524	protein_coding	Rho GTPase activating protein 29 [Source:HGNC Symbol;Acc:HGNC:30207]	-
ENSG00000183696	10089	10602.2	10080.2	4535.83	4160.59	4155.78	10257.1	4284.07	1.25962	4.93756e-80	3.28838e-78	UPP1	7	48088628	48108733	+	4577	protein_coding	uridine phosphorylase 1 [Source:HGNC Symbol;Acc:HGNC:12576]	-
ENSG00000163918	198.887	210.938	204.446	883.461	917.487	871.402	204.757	890.783	-2.12039	1.38151e-79	9.17139e-78	RFC4	3	186789880	186807058	-	2997	protein_coding	replication factor C subunit 4 [Source:HGNC Symbol;Acc:HGNC:9972]	-
ENSG00000167513	207.928	173.051	153.061	1010.19	866.828	962.708	178.013	946.576	-2.41239	1.61763e-79	1.07047e-77	CDT1	16	88803213	88809258	+	3336	protein_coding	chromatin licensing and DNA replication factor 1 [Source:HGNC Symbol;Acc:HGNC:24576]	-
ENSG00000136802	10025.7	8467.2	9158.54	3552.08	3417.59	3389.87	9217.16	3453.18	1.41629	2.14725e-79	1.41644e-77	LRRC8A	9	128882112	128918039	+	5230	protein_coding	leucine rich repeat containing 8 VRAC subunit A [Source:HGNC Symbol;Acc:HGNC:19027]	-
ENSG00000245532	12311.8	14312	13575.5	4541.3	5185.02	4936.76	13399.8	4887.69	1.45508	3.01258e-79	1.98096e-77	NEAT1	11	65422774	65445540	+	22767	lincRNA	nuclear paraspeckle assembly transcript 1 [Source:HGNC Symbol;Acc:HGNC:30815]	-
ENSG00000188229	5420.81	5124.97	4784.26	14036.9	12767	12694.3	5110.01	13166	-1.36547	3.98433e-79	2.61169e-77	TUBB4B	9	137241213	137243707	+	2111	protein_coding	tubulin beta 4B class IVb [Source:HGNC Symbol;Acc:HGNC:20771]	-
ENSG00000179477	537.9	414.708	412.173	20.0579	22.515	33.6859	454.927	25.4196	4.15676	4.00161e-79	2.61476e-77	ALOX12B	17	8072636	8087716	-	2746	protein_coding	arachidonate 12-lipoxygenase, 12R type [Source:HGNC Symbol;Acc:HGNC:430]	-
ENSG00000138182	176.287	207.866	182.58	859.756	1055.39	1056.67	188.911	990.607	-2.38888	4.12399e-79	2.68628e-77	KIF20B	10	89701610	89774939	+	6851	protein_coding	kinesin family member 20B [Source:HGNC Symbol;Acc:HGNC:7212]	-
ENSG00000134802	90.4034	41.9827	73.2508	738.497	677.327	639.146	68.5457	684.99	-3.33011	4.72382e-79	3.06739e-77	SLC43A3	11	57406954	57427580	-	4517	protein_coding	solute carrier family 43 member 3 [Source:HGNC Symbol;Acc:HGNC:17466]	-
ENSG00000115963	3068.07	3543.96	2918.01	1036.63	1014.11	1001.71	3176.68	1017.49	1.6428	5.68976e-79	3.6831e-77	RND3	2	150468195	150539011	-	3594	protein_coding	Rho family GTPase 3 [Source:HGNC Symbol;Acc:HGNC:671]	-
ENSG00000160179	1132.3	1068	973.033	216.079	246.727	260.623	1057.78	241.143	2.1327	8.18158e-79	5.27966e-77	ABCG1	21	42199689	42297244	+	6121	protein_coding	ATP binding cassette subfamily G member 1 [Source:HGNC Symbol;Acc:HGNC:73]	-
ENSG00000164985	544.681	546.8	555.394	1639.28	1833.1	1834.11	548.958	1768.83	-1.68803	9.26966e-79	5.96329e-77	PSIP1	9	15464066	15511019	-	6768	protein_coding	PC4 and SFRS1 interacting protein 1 [Source:HGNC Symbol;Acc:HGNC:9527]	-
ENSG00000110203	1194.46	1388.5	1127.19	266.224	197.006	262.396	1236.72	241.875	2.35347	1.28543e-78	8.2438e-77	FOLR3	11	72114869	72139892	+	1396	protein_coding	folate receptor 3 [Source:HGNC Symbol;Acc:HGNC:3795]	-
ENSG00000145050	1239.66	1314.78	1281.34	4059.91	3459.81	3616.81	1278.59	3712.17	-1.53752	1.33762e-78	8.55211e-77	MANF	3	51385047	51389397	+	2383	protein_coding	mesencephalic astrocyte derived neurotrophic factor [Source:HGNC Symbol;Acc:HGNC:15461]	-
ENSG00000162849	832.841	656.364	766.4	132.2	118.204	131.198	751.869	127.201	2.56199	1.40028e-78	8.92525e-77	KIF26B	1	245154985	245709431	+	14403	protein_coding	kinesin family member 26B [Source:HGNC Symbol;Acc:HGNC:25484]	-
ENSG00000123473	94.9236	77.8217	106.05	632.737	609.782	622.303	92.9316	621.607	-2.74492	1.56575e-78	9.94943e-77	STIL	1	47250139	47314147	-	7291	protein_coding	STIL, centriolar assembly protein [Source:HGNC Symbol;Acc:HGNC:10879]	-
ENSG00000164649	261.04	259.064	259.111	1025.69	985.97	1013.24	259.738	1008.3	-1.95692	1.87708e-78	1.18914e-76	CDCA7L	7	21900900	21946084	-	4074	protein_coding	cell division cycle associated 7 like [Source:HGNC Symbol;Acc:HGNC:30777]	-
ENSG00000117650	25.991	33.791	44.8251	465.891	439.981	509.721	34.869	471.865	-3.75648	2.89666e-78	1.82948e-76	NEK2	1	211658657	211675630	-	3095	protein_coding	NIMA related kinase 2 [Source:HGNC Symbol;Acc:HGNC:7745]	-
ENSG00000091129	1088.23	1069.02	1187.32	174.139	246.727	242.007	1114.86	220.958	2.33503	3.5033e-78	2.20591e-76	NRCAM	7	108147623	108456717	-	8193	protein_coding	neuronal cell adhesion molecule [Source:HGNC Symbol;Acc:HGNC:7994]	-
ENSG00000102384	49.7219	33.791	36.0788	443.098	480.32	526.564	39.8639	483.328	-3.60605	4.61217e-78	2.89535e-76	CENPI	X	101098218	101163681	+	4321	protein_coding	centromere protein I [Source:HGNC Symbol;Acc:HGNC:3968]	-
ENSG00000197641	431.676	392.18	376.094	10.029	11.2575	13.2971	399.983	11.5279	5.11437	1.85155e-77	1.15884e-75	SERPINB13	18	63586989	63604639	+	4535	protein_coding	serpin family B member 13 [Source:HGNC Symbol;Acc:HGNC:8944]	-
ENSG00000148773	181.937	113.661	198.98	3021.45	3229.03	3446.6	164.859	3232.36	-4.29508	1.8931e-77	1.18128e-75	MKI67	10	128096659	128126385	-	12807	protein_coding	marker of proliferation Ki-67 [Source:HGNC Symbol;Acc:HGNC:7107]	-
ENSG00000030582	20373.5	19713.5	19105.3	8844.64	7885.89	8033.21	19730.8	8254.58	1.25716	2.01037e-77	1.2507e-75	GRN	17	44345086	44353102	+	3680	protein_coding	granulin precursor [Source:HGNC Symbol;Acc:HGNC:4601]	-
ENSG00000160447	73.4528	64.5101	90.7436	630.002	574.133	554.045	76.2355	586.06	-2.94496	2.38991e-77	1.48239e-75	PKN3	9	128702523	128720918	+	3375	protein_coding	protein kinase N3 [Source:HGNC Symbol;Acc:HGNC:17999]	-
ENSG00000102287	1397.86	1449.94	1626.82	442.186	427.785	424.62	1491.54	431.531	1.78932	4.52033e-77	2.79547e-75	GABRE	X	151953124	151974680	-	9612	protein_coding	gamma-aminobutyric acid type A receptor epsilon subunit [Source:HGNC Symbol;Acc:HGNC:4085]	-
ENSG00000164611	325.452	326.646	241.618	1291	1264.59	1295.14	297.906	1283.58	-2.10675	4.73326e-77	2.91847e-75	PTTG1	5	160421822	160428744	+	2013	protein_coding	pituitary tumor-transforming 1 [Source:HGNC Symbol;Acc:HGNC:9690]	-
ENSG00000147676	1476.97	1806.28	1329.45	270.782	348.983	296.968	1537.57	305.578	2.33201	5.1084e-77	3.14046e-75	MAL2	8	119165034	119245673	+	3430	protein_coding	mal, T cell differentiation protein 2 (gene/pseudogene) [Source:HGNC Symbol;Acc:HGNC:13634]	-
ENSG00000205336	3677.16	3255.2	3577.26	1306.5	1149.2	1222.44	3503.21	1226.05	1.51433	7.89981e-77	4.84219e-75	ADGRG1	16	57610652	57665580	+	8659	protein_coding	adhesion G protein-coupled receptor G1 [Source:HGNC Symbol;Acc:HGNC:4512]	-
ENSG00000143228	18.0807	30.7191	31.7056	413.923	465.31	433.485	26.8351	437.573	-4.01983	8.36887e-77	5.11461e-75	NUF2	1	163266576	163355764	+	3362	protein_coding	NUF2, NDC80 kinetochore complex component [Source:HGNC Symbol;Acc:HGNC:14621]	-
ENSG00000144824	4799.29	5129.06	4753.65	1884.53	2006.65	2024.7	4894	1971.96	1.31148	1.25223e-76	7.63052e-75	PHLDB2	3	111732497	111976517	+	12309	protein_coding	pleckstrin homology like domain family B member 2 [Source:HGNC Symbol;Acc:HGNC:29573]	-
ENSG00000112312	185.327	205.818	180.394	831.493	846.19	859.878	190.513	845.853	-2.14915	1.48383e-76	9.01534e-75	GMNN	6	24774931	24786099	+	2476	protein_coding	geminin, DNA replication inhibitor [Source:HGNC Symbol;Acc:HGNC:17493]	-
ENSG00000160712	2292.86	2013.12	2147.23	692.911	739.243	728.68	2151.07	720.278	1.57816	2.6553e-76	1.60859e-74	IL6R	1	154405193	154469450	+	6453	protein_coding	interleukin 6 receptor [Source:HGNC Symbol;Acc:HGNC:6019]	-
ENSG00000175040	1224.97	1163.23	1203.72	363.778	330.22	321.789	1197.3	338.596	1.82208	2.85453e-76	1.72425e-74	CHST2	3	143119331	143124014	+	4582	protein_coding	carbohydrate sulfotransferase 2 [Source:HGNC Symbol;Acc:HGNC:1970]	-
ENSG00000122566	6228.79	6510.4	6132.3	13761.6	13581.2	14313	6290.5	13885.3	-1.14225	5.56958e-76	3.3545e-74	HNRNPA2B1	7	26173057	26201529	-	9267	protein_coding	heterogeneous nuclear ribonucleoprotein A2/B1 [Source:HGNC Symbol;Acc:HGNC:5033]	-
ENSG00000140519	479.138	409.588	403.426	23.7048	29.0819	41.6642	430.717	31.4836	3.76996	1.011e-75	6.07158e-74	RHCG	15	89471398	89496613	-	2607	protein_coding	Rh family C glycoprotein [Source:HGNC Symbol;Acc:HGNC:18140]	-
ENSG00000154146	23.7309	22.5273	20.7726	427.599	385.57	421.961	22.3436	411.71	-4.20444	1.62794e-75	9.74843e-74	NRGN	11	124739846	124747210	+	1309	protein_coding	neurogranin [Source:HGNC Symbol;Acc:HGNC:8000]	-
ENSG00000111247	33.9013	29.6951	40.4519	402.07	492.516	467.171	34.6828	453.919	-3.71303	2.89973e-75	1.73142e-73	RAD51AP1	12	4538798	4560048	+	2558	protein_coding	RAD51 associated protein 1 [Source:HGNC Symbol;Acc:HGNC:16956]	-
ENSG00000173207	396.645	494.577	402.333	1777.86	1618.27	1548.67	431.185	1648.27	-1.93289	3.84495e-75	2.28923e-73	CKS1B	1	154974653	154979249	+	2338	protein_coding	CDC28 protein kinase regulatory subunit 1B [Source:HGNC Symbol;Acc:HGNC:19083]	-
ENSG00000091651	101.704	106.493	132.289	707.498	674.512	632.054	113.495	671.355	-2.56449	1.99943e-74	1.18703e-72	ORC6	16	46689643	46698394	+	4309	protein_coding	origin recognition complex subunit 6 [Source:HGNC Symbol;Acc:HGNC:17151]	-
ENSG00000178913	1693.93	1857.48	1592.93	526.977	550.68	511.494	1714.78	529.717	1.6953	2.09095e-74	1.23783e-72	TAF7	5	141260225	141320821	-	2723	protein_coding	TATA-box binding protein associated factor 7 [Source:HGNC Symbol;Acc:HGNC:11541]	-
ENSG00000181458	883.693	819.176	742.348	169.581	163.234	183.5	815.072	172.105	2.2428	2.1542e-74	1.27165e-72	TMEM45A	3	100492619	100577444	+	6005	protein_coding	transmembrane protein 45A [Source:HGNC Symbol;Acc:HGNC:25480]	-
ENSG00000185966	606.833	480.242	423.105	8.20552	5.62876	7.09178	503.393	6.97535	6.17019	3.00045e-74	1.76618e-72	LCE3E	1	152565654	152566772	-	611	protein_coding	late cornified envelope 3E [Source:HGNC Symbol;Acc:HGNC:29463]	-
ENSG00000214548	1862.31	1851.34	2181.13	614.502	616.349	580.639	1964.92	603.83	1.70235	3.27176e-74	1.92045e-72	MEG3	14	100779410	100861031	+	23224	lincRNA	maternally expressed 3 [Source:HGNC Symbol;Acc:HGNC:14575]	-
ENSG00000092470	56.5021	61.4382	68.8776	485.949	481.259	492.878	62.2726	486.695	-2.96574	6.50458e-73	3.80729e-71	WDR76	15	43826963	43868419	+	4078	protein_coding	WD repeat domain 76 [Source:HGNC Symbol;Acc:HGNC:25773]	-
ENSG00000187498	923.245	841.703	872.45	2295.72	2495.41	2440.46	879.133	2410.53	-1.45568	5.05539e-72	2.95073e-70	COL4A1	13	110148963	110307233	-	14738	protein_coding	collagen type IV alpha 1 chain [Source:HGNC Symbol;Acc:HGNC:2202]	-
ENSG00000256812	601.183	641.005	518.222	101.201	84.4313	88.6472	586.803	91.4266	2.68225	1.28386e-71	7.47262e-70	CAPNS2	16	55566672	55567687	+	1016	protein_coding	calpain small subunit 2 [Source:HGNC Symbol;Acc:HGNC:16371]	-
ENSG00000171320	18.0807	19.4554	19.6793	363.778	417.466	383.842	19.0718	388.362	-4.34653	3.40971e-71	1.97906e-69	ESCO2	8	27771949	27812640	+	7973	protein_coding	establishment of sister chromatid cohesion N-acetyltransferase 2 [Source:HGNC Symbol;Acc:HGNC:27230]	-
ENSG00000171223	7032.25	7298.85	6028.43	2520.01	2175.51	2248.98	6786.51	2314.83	1.55178	3.91113e-71	2.26377e-69	JUNB	19	12791496	12793315	+	1820	protein_coding	JunB proto-oncogene, AP-1 transcription factor subunit [Source:HGNC Symbol;Acc:HGNC:6205]	TF_bZIP
ENSG00000167508	1579.8	1398.74	1442.06	4974.37	4068.65	4263.04	1473.53	4435.35	-1.59013	5.70595e-71	3.29344e-69	MVD	16	88651935	88663161	-	4717	protein_coding	mevalonate diphosphate decarboxylase [Source:HGNC Symbol;Acc:HGNC:7529]	-
ENSG00000141232	2253.3	2155.46	2028.06	794.112	769.263	786.301	2145.61	783.225	1.45374	6.74529e-71	3.88256e-69	TOB1	17	50862223	50867978	-	2521	protein_coding	transducer of ERBB2, 1 [Source:HGNC Symbol;Acc:HGNC:11979]	-
ENSG00000198554	281.381	321.526	342.202	1117.77	1146.39	1148.87	315.036	1137.68	-1.85162	1.118e-70	6.41738e-69	WDHD1	14	54938950	55027105	-	6385	protein_coding	WD repeat and HMG-box DNA binding protein 1 [Source:HGNC Symbol;Acc:HGNC:23170]	HMG
ENSG00000147536	33.9013	27.6472	51.3849	457.686	431.538	421.961	37.6445	437.061	-3.54198	4.90599e-70	2.80831e-68	GINS4	8	41529206	41545046	+	5475	protein_coding	GINS complex subunit 4 [Source:HGNC Symbol;Acc:HGNC:28226]	-
ENSG00000124102	387.605	312.311	367.347	22.7931	15.9481	15.9565	355.754	18.2326	4.28544	6.83638e-70	3.90256e-68	PI3	20	45174876	45176544	+	577	protein_coding	peptidase inhibitor 3 [Source:HGNC Symbol;Acc:HGNC:8947]	-
ENSG00000188153	3812.76	3708.82	3530.25	1451.47	1546.97	1544.23	3683.94	1514.22	1.28265	8.58666e-70	4.88828e-68	COL4A5	X	108439844	108697545	+	11865	protein_coding	collagen type IV alpha 5 chain [Source:HGNC Symbol;Acc:HGNC:2207]	-
ENSG00000115758	23367	26702.1	23110.1	10427.4	9764.95	10104.9	24393.1	10099.1	1.27228	1.30138e-69	7.38837e-68	ODC1	2	10439968	10448504	-	2968	protein_coding	ornithine decarboxylase 1 [Source:HGNC Symbol;Acc:HGNC:8109]	-
ENSG00000073756	3680.55	3677.07	3657.07	1280.06	1471.92	1484.84	3671.57	1412.27	1.37836	1.60531e-69	9.08902e-68	PTGS2	1	186671791	186680427	-	5269	protein_coding	prostaglandin-endoperoxide synthase 2 [Source:HGNC Symbol;Acc:HGNC:9605]	-
ENSG00000170873	2051.03	1929.16	2206.27	696.557	659.502	744.636	2062.15	700.232	1.5577	1.06251e-68	5.99944e-67	MTSS1	8	124550790	124728429	-	7727	protein_coding	MTSS1, I-BAR domain containing [Source:HGNC Symbol;Acc:HGNC:20443]	-
ENSG00000136527	1252.09	1254.36	1290.09	2970.4	3002	3046.8	1265.51	3006.4	-1.24836	1.91768e-68	1.07987e-66	TRA2B	3	185915906	185938136	-	11769	protein_coding	transformer 2 beta homolog [Source:HGNC Symbol;Acc:HGNC:10781]	-
ENSG00000149591	3112.14	3530.65	3000	1193.45	1122	1186.99	3214.26	1167.48	1.46123	2.09574e-68	1.17696e-66	TAGLN	11	117199321	117204782	+	3917	protein_coding	transgelin [Source:HGNC Symbol;Acc:HGNC:11553]	-
ENSG00000132746	436.196	359.413	365.161	7.2938	5.62876	10.6377	386.924	7.8534	5.61428	2.66525e-68	1.49276e-66	ALDH3B2	11	67662162	67681200	-	3235	protein_coding	aldehyde dehydrogenase 3 family member B2 [Source:HGNC Symbol;Acc:HGNC:411]	-
ENSG00000131153	77.9729	96.2531	87.4637	613.591	512.217	562.023	87.2299	562.61	-2.68669	3.89202e-68	2.17399e-66	GINS2	16	85676198	85690073	-	3264	protein_coding	GINS complex subunit 2 [Source:HGNC Symbol;Acc:HGNC:24575]	-
ENSG00000112414	428.286	411.636	438.412	1272.77	1311.5	1353.64	426.111	1312.64	-1.62363	5.79546e-68	3.22852e-66	ADGRG6	6	142301854	142446266	+	8473	protein_coding	adhesion G protein-coupled receptor G6 [Source:HGNC Symbol;Acc:HGNC:13841]	-
ENSG00000176619	2477.05	2209.73	2538.63	6595.41	5928.96	5996.1	2408.47	6173.49	-1.35827	7.15232e-68	3.97374e-66	LMNB2	19	2427638	2456996	-	5432	protein_coding	lamin B2 [Source:HGNC Symbol;Acc:HGNC:6638]	-
ENSG00000184678	349.183	312.311	428.572	19.1462	23.4531	18.6159	363.355	20.4051	4.15616	8.85144e-68	4.90464e-66	HIST2H2BE	1	149884459	149886652	-	2194	protein_coding	histone cluster 2 H2B family member e [Source:HGNC Symbol;Acc:HGNC:4760]	-
ENSG00000151651	1602.4	1502.16	1618.08	4492.07	3894.16	3982.92	1574.21	4123.05	-1.38934	1.09073e-67	6.02772e-66	ADAM8	10	133262403	133276868	-	4780	protein_coding	ADAM metallopeptidase domain 8 [Source:HGNC Symbol;Acc:HGNC:215]	-
ENSG00000159674	407.945	320.502	419.826	26.44	10.3194	24.8212	382.758	20.5269	4.21336	3.8873e-67	2.14255e-65	SPON2	4	1166932	1208962	-	6013	protein_coding	spondin 2 [Source:HGNC Symbol;Acc:HGNC:11253]	-
ENSG00000105486	314.152	323.574	323.616	1074.01	1052.58	1047.81	320.447	1058.13	-1.7231	3.98657e-67	2.19145e-65	LIG1	19	48115445	48170603	-	6576	protein_coding	DNA ligase 1 [Source:HGNC Symbol;Acc:HGNC:6598]	-
ENSG00000159314	1438.54	1413.08	1412.54	482.302	446.548	504.403	1421.39	477.751	1.57243	4.0426e-67	2.21639e-65	ARHGAP27	17	45393902	45434421	-	10426	protein_coding	Rho GTPase activating protein 27 [Source:HGNC Symbol;Acc:HGNC:31813]	-
ENSG00000112759	326.582	328.694	367.347	1270.03	1145.45	1133.8	340.875	1183.09	-1.7954	4.53807e-67	2.48149e-65	SLC29A1	6	44219505	44234151	+	4408	protein_coding	solute carrier family 29 member 1 (Augustine blood group) [Source:HGNC Symbol;Acc:HGNC:11003]	-
ENSG00000109084	162.726	198.65	192.42	846.992	763.634	796.938	184.599	802.522	-2.11832	5.39068e-67	2.93997e-65	TMEM97	17	28319095	28328685	+	3034	protein_coding	transmembrane protein 97 [Source:HGNC Symbol;Acc:HGNC:28106]	-
ENSG00000189403	2098.49	2400.18	2269.68	5494.96	5318.24	5810.82	2256.12	5541.34	-1.29609	8.34164e-67	4.53746e-65	HMGB1	13	30456704	30617597	-	7723	protein_coding	high mobility group box 1 [Source:HGNC Symbol;Acc:HGNC:4983]	HMG
ENSG00000151715	458.797	325.622	337.828	21.8814	22.515	22.1618	374.083	22.1861	4.07472	8.70804e-67	4.7244e-65	TMEM45B	11	129815819	129860003	+	3027	protein_coding	transmembrane protein 45B [Source:HGNC Symbol;Acc:HGNC:25194]	-
ENSG00000145824	2133.52	2068.42	1941.69	79.32	37.525	74.4636	2047.88	63.7696	5.00343	1.1839e-66	6.40631e-65	CXCL14	5	135570679	135579279	-	1975	protein_coding	C-X-C motif chemokine ligand 14 [Source:HGNC Symbol;Acc:HGNC:10640]	-
ENSG00000126709	14071.3	13495.9	12267.9	5052.78	4588.37	3908.45	13278.4	4516.53	1.55585	1.19787e-66	6.46507e-65	IFI6	1	27666061	27672218	-	865	protein_coding	interferon alpha inducible protein 6 [Source:HGNC Symbol;Acc:HGNC:4054]	-
ENSG00000123975	226.009	349.174	248.178	1514.37	1237.39	1400.63	274.453	1384.13	-2.33143	1.32154e-66	7.11405e-65	CKS2	9	89311198	89316703	+	613	protein_coding	CDC28 protein kinase regulatory subunit 2 [Source:HGNC Symbol;Acc:HGNC:2000]	-
ENSG00000145147	88.1433	65.534	88.557	495.978	555.371	546.953	80.7448	532.767	-2.7262	1.53502e-66	8.24189e-65	SLIT2	4	20253260	20620561	+	9712	protein_coding	slit guidance ligand 2 [Source:HGNC Symbol;Acc:HGNC:11086]	-
ENSG00000070731	1288.25	1059.81	1307.58	284.458	258.923	331.54	1218.55	291.64	2.06149	1.56984e-66	8.40714e-65	ST6GALNAC2	17	76565379	76586956	-	3098	protein_coding	ST6 N-acetylgalactosaminide alpha-2,6-sialyltransferase 2 [Source:HGNC Symbol;Acc:HGNC:10867]	-
ENSG00000133639	1432.89	1496.02	1513.12	514.213	531.917	478.695	1480.68	508.275	1.5431	3.28831e-66	1.7565e-64	BTG1	12	92140278	92145897	-	4854	protein_coding	BTG anti-proliferation factor 1 [Source:HGNC Symbol;Acc:HGNC:1130]	-
ENSG00000147883	1135.69	1070.05	1094.39	351.014	338.663	348.383	1100.04	346.02	1.66827	4.31953e-66	2.30142e-64	CDKN2B	9	22002903	22009363	-	4058	protein_coding	cyclin dependent kinase inhibitor 2B [Source:HGNC Symbol;Acc:HGNC:1788]	-
ENSG00000105427	426.026	327.67	350.948	30.0869	31.8963	24.8212	368.215	28.9348	3.67095	4.96801e-66	2.64016e-64	CNFN	19	42387019	42390287	-	603	protein_coding	cornifelin [Source:HGNC Symbol;Acc:HGNC:30183]	-
ENSG00000095002	340.143	390.132	349.855	1152.42	1181.1	1181.67	360.043	1171.73	-1.70112	8.77707e-66	4.65252e-64	MSH2	2	47402969	47663146	+	13777	protein_coding	mutS homolog 2 [Source:HGNC Symbol;Acc:HGNC:7325]	-
ENSG00000196139	396.645	418.804	355.321	41.9393	35.6488	47.8695	390.257	41.8192	3.22006	1.0255e-65	5.42211e-64	AKR1C3	10	5035354	5107686	+	4532	protein_coding	aldo-keto reductase family 1 member C3 [Source:HGNC Symbol;Acc:HGNC:386]	-
ENSG00000075426	2755.04	2503.61	2656.71	1063.07	1071.34	1005.26	2638.45	1046.56	1.33398	2.94457e-65	1.55292e-63	FOSL2	2	28392448	28417312	+	7157	protein_coding	FOS like 2, AP-1 transcription factor subunit [Source:HGNC Symbol;Acc:HGNC:3798]	TF_bZIP
ENSG00000169583	446.367	395.252	388.12	55.6152	52.535	46.0965	409.913	51.4156	2.99559	3.44914e-65	1.81442e-63	CLIC3	9	136994635	136996803	-	1177	protein_coding	chloride intracellular channel 3 [Source:HGNC Symbol;Acc:HGNC:2064]	-
ENSG00000160752	1571.89	1304.54	1538.27	4172.96	3886.66	3877.43	1471.56	3979.02	-1.43569	4.61132e-65	2.41966e-63	FDPS	1	155308748	155320666	+	3718	protein_coding	farnesyl diphosphate synthase [Source:HGNC Symbol;Acc:HGNC:3631]	-
ENSG00000111665	28.2511	27.6472	37.1721	430.334	363.055	361.681	31.0234	385.023	-3.63497	4.83423e-65	2.53024e-63	CDCA3	12	6844793	6852066	-	5653	protein_coding	cell division cycle associated 3 [Source:HGNC Symbol;Acc:HGNC:14624]	-
ENSG00000123219	31.6412	48.1266	43.7318	374.719	465.31	431.712	41.1665	423.914	-3.35821	6.95937e-65	3.63339e-63	CENPK	5	65517766	65563171	-	4312	protein_coding	centromere protein K [Source:HGNC Symbol;Acc:HGNC:29479]	-
ENSG00000134762	9210.98	9210.61	8702.63	3145.45	3665.26	3823.35	9041.41	3544.69	1.35086	7.76974e-65	4.0463e-63	DSC3	18	30990008	31042815	-	7056	protein_coding	desmocollin 3 [Source:HGNC Symbol;Acc:HGNC:3037]	-
ENSG00000011347	951.496	827.367	921.648	223.372	252.356	235.802	900.171	237.177	1.92407	1.06242e-64	5.51898e-63	SYT7	11	61515313	61581148	-	5953	protein_coding	synaptotagmin 7 [Source:HGNC Symbol;Acc:HGNC:11514]	-
ENSG00000278259	654.295	675.82	701.896	1766.92	1795.57	1805.74	677.337	1789.41	-1.40141	1.67243e-64	8.66617e-63	MYO19	17	36495633	36543435	-	13075	protein_coding	myosin XIX [Source:HGNC Symbol;Acc:HGNC:26234]	-
ENSG00000184661	65.5425	84.9895	86.3704	507.83	488.764	499.97	78.9674	498.855	-2.65639	2.59591e-64	1.3418e-62	CDCA2	8	25458997	25507920	+	3908	protein_coding	cell division cycle associated 2 [Source:HGNC Symbol;Acc:HGNC:14623]	-
ENSG00000058804	536.77	542.704	522.595	1455.11	1548.85	1490.16	534.023	1498.04	-1.4879	3.56999e-64	1.84072e-62	NDC1	1	53765460	53838860	-	5135	protein_coding	NDC1 transmembrane nucleoporin [Source:HGNC Symbol;Acc:HGNC:25525]	-
ENSG00000100003	1290.51	1211.36	1244.17	417.57	334.911	367.886	1248.68	373.456	1.74085	4.21602e-64	2.16843e-62	SEC14L2	22	30396857	30425317	+	5985	protein_coding	SEC14 like lipid binding 2 [Source:HGNC Symbol;Acc:HGNC:10699]	-
ENSG00000110400	7660.56	6579	7408.17	3088.92	2956.97	3013.12	7215.91	3019.67	1.25663	4.87225e-64	2.49976e-62	NECTIN1	11	119623408	119729084	-	7701	protein_coding	nectin cell adhesion molecule 1 [Source:HGNC Symbol;Acc:HGNC:9706]	-
ENSG00000130707	2894.04	3454.87	3026.24	1123.24	1006.61	1152.41	3125.05	1094.09	1.51418	5.97434e-64	3.05766e-62	ASS1	9	130444929	130501274	+	3050	protein_coding	argininosuccinate synthase 1 [Source:HGNC Symbol;Acc:HGNC:758]	-
ENSG00000080824	12023.7	11650.7	11434.8	24622	23132.3	25193.5	11703.1	24316	-1.05505	7.28339e-64	3.71847e-62	HSP90AA1	14	102080738	102139699	-	5248	protein_coding	heat shock protein 90 alpha family class A member 1 [Source:HGNC Symbol;Acc:HGNC:5253]	-
ENSG00000116016	6467.23	5908.3	6346.58	2646.74	2750.59	2868.62	6240.71	2755.31	1.17933	7.79187e-64	3.96832e-62	EPAS1	2	46293667	46386703	+	7302	protein_coding	endothelial PAS domain protein 1 [Source:HGNC Symbol;Acc:HGNC:3374]	Others
ENSG00000162607	389.865	424.947	380.467	1203.48	1273.97	1222.44	398.426	1233.3	-1.62921	9.52903e-64	4.84116e-62	USP1	1	62436297	62451804	+	4263	protein_coding	ubiquitin specific peptidase 1 [Source:HGNC Symbol;Acc:HGNC:12607]	-
ENSG00000140534	98.3137	94.2052	113.703	529.712	629.482	567.342	102.074	575.512	-2.49599	1.14846e-63	5.82045e-62	TICRR	15	89575482	89631056	+	8402	protein_coding	TOPBP1 interacting checkpoint and replication regulator [Source:HGNC Symbol;Acc:HGNC:28704]	-
ENSG00000100749	192.107	217.082	163.994	803.229	847.128	788.074	191.061	812.81	-2.08699	1.48643e-63	7.515e-62	VRK1	14	96797304	96931722	+	2744	protein_coding	vaccinia related kinase 1 [Source:HGNC Symbol;Acc:HGNC:12718]	-
ENSG00000160949	265.56	216.058	280.977	1043.92	968.146	952.957	254.198	988.343	-1.96104	2.59262e-63	1.30757e-61	TONSL	8	144428775	144444444	-	7111	protein_coding	tonsoku like, DNA repair protein [Source:HGNC Symbol;Acc:HGNC:7801]	-
ENSG00000147155	1032.86	972.771	1060.5	3016.9	2624.88	2635.48	1022.04	2759.08	-1.43305	3.16984e-63	1.59482e-61	EBP	X	48521158	48528716	+	2409	protein_coding	EBP, cholestenol delta-isomerase [Source:HGNC Symbol;Acc:HGNC:3133]	-
ENSG00000149503	345.793	397.3	354.228	1129.63	1228.94	1201.17	365.774	1186.58	-1.6965	3.47882e-63	1.74605e-61	INCENP	11	62123973	62153163	+	4473	protein_coding	inner centromere protein [Source:HGNC Symbol;Acc:HGNC:6058]	-
ENSG00000166451	77.9729	78.8456	80.9039	461.333	517.845	477.808	79.2408	485.662	-2.6154	4.34826e-63	2.17717e-61	CENPN	16	81006498	81033114	+	3568	protein_coding	centromere protein N [Source:HGNC Symbol;Acc:HGNC:30873]	-
ENSG00000001084	2587.8	2575.28	2536.45	1084.04	1081.66	1123.16	2566.51	1096.29	1.22707	8.4508e-63	4.22113e-61	GCLC	6	53497341	53616970	-	8646	protein_coding	glutamate-cysteine ligase catalytic subunit [Source:HGNC Symbol;Acc:HGNC:4311]	-
ENSG00000120756	141.255	120.828	142.128	594.444	675.451	660.422	134.737	643.439	-2.25757	1.3555e-62	6.75442e-61	PLS1	3	142596387	142713664	+	5294	protein_coding	plastin 1 [Source:HGNC Symbol;Acc:HGNC:9090]	-
ENSG00000206538	687.066	751.594	664.724	157.728	180.12	156.019	701.128	164.623	2.09177	1.48556e-62	7.38479e-61	VGLL3	3	86876388	86991119	-	12714	protein_coding	vestigial like family member 3 [Source:HGNC Symbol;Acc:HGNC:24327]	-
ENSG00000137203	3869.27	3567.51	3983.97	1515.29	1646.41	1589.44	3806.92	1583.71	1.26522	1.57197e-62	7.79569e-61	TFAP2A	6	10393186	10419659	-	8274	protein_coding	transcription factor AP-2 alpha [Source:HGNC Symbol;Acc:HGNC:11742]	AP-2
ENSG00000114346	545.811	488.433	432.945	1508.9	1500.06	1597.42	489.063	1535.46	-1.6512	2.47762e-62	1.22577e-60	ECT2	3	172750682	172821474	+	5499	protein_coding	epithelial cell transforming 2 [Source:HGNC Symbol;Acc:HGNC:3155]	-
ENSG00000136156	9560.16	9990.87	8492.72	3924.06	4048.01	3982.03	9347.92	3984.7	1.23024	2.97555e-62	1.46862e-60	ITM2B	13	48232612	48270357	+	10706	protein_coding	integral membrane protein 2B [Source:HGNC Symbol;Acc:HGNC:6174]	-
ENSG00000095383	2758.43	2859.95	2787.9	1236.3	1207.37	1154.19	2802.09	1199.28	1.22454	3.32468e-62	1.63705e-60	TBC1D2	9	98198999	98255721	-	3681	protein_coding	TBC1 domain family member 2 [Source:HGNC Symbol;Acc:HGNC:18026]	-
ENSG00000111445	119.785	114.685	103.863	570.739	589.143	539.861	112.777	566.581	-2.32886	4.33511e-62	2.12953e-60	RFC5	12	118013588	118033130	+	3249	protein_coding	replication factor C subunit 5 [Source:HGNC Symbol;Acc:HGNC:9973]	-
ENSG00000076706	835.101	696.299	911.809	2471.68	2383.78	2488.33	814.403	2447.93	-1.58871	7.07114e-62	3.46536e-60	MCAM	11	119308529	119321521	-	7422	protein_coding	melanoma cell adhesion molecule [Source:HGNC Symbol;Acc:HGNC:6934]	-
ENSG00000161888	30.5111	18.4315	36.0788	402.07	360.24	343.065	28.3405	368.458	-3.70927	8.07281e-62	3.94694e-60	SPC24	19	11131520	11155808	-	2839	protein_coding	SPC24, NDC80 kinetochore complex component [Source:HGNC Symbol;Acc:HGNC:26913]	-
ENSG00000171388	65.5425	33.791	64.5045	556.152	494.392	442.349	54.6126	497.631	-3.19607	2.32969e-61	1.13635e-59	APLN	X	129645259	129654937	-	3205	protein_coding	apelin [Source:HGNC Symbol;Acc:HGNC:16665]	-
ENSG00000113657	187.587	116.733	182.58	848.815	800.221	867.856	162.3	838.964	-2.37432	2.53125e-61	1.23178e-59	DPYSL3	5	147390811	147510056	-	7164	protein_coding	dihydropyrimidinase like 3 [Source:HGNC Symbol;Acc:HGNC:3015]	-
ENSG00000114812	657.685	492.529	558.674	97.5545	74.1119	98.3984	569.629	90.0216	2.65917	3.42414e-61	1.66239e-59	VIPR1	3	42489299	42537573	+	7384	protein_coding	vasoactive intestinal peptide receptor 1 [Source:HGNC Symbol;Acc:HGNC:12694]	-
ENSG00000077152	115.264	126.972	126.822	655.53	565.69	584.185	123.02	601.802	-2.28946	4.16399e-61	2.01686e-59	UBE2T	1	202331657	202341980	-	1652	protein_coding	ubiquitin conjugating enzyme E2 T [Source:HGNC Symbol;Acc:HGNC:25009]	-
ENSG00000178921	378.564	395.252	404.519	1239.03	1277.73	1134.68	392.779	1217.15	-1.63125	4.73454e-61	2.28788e-59	PFAS	17	8247618	8270491	+	6471	protein_coding	phosphoribosylformylglycinamidine synthase [Source:HGNC Symbol;Acc:HGNC:8863]	-
ENSG00000188486	569.541	467.954	578.353	2059.59	1743.04	1698.48	538.616	1833.7	-1.76852	7.66716e-61	3.69642e-59	H2AFX	11	119093854	119095467	-	1614	protein_coding	H2A histone family member X [Source:HGNC Symbol;Acc:HGNC:4739]	-
ENSG00000049089	99.4437	100.349	127.916	601.738	536.608	592.163	109.236	576.836	-2.40148	1.10644e-60	5.32191e-59	COL9A2	1	40300487	40317813	-	4217	protein_coding	collagen type IX alpha 2 chain [Source:HGNC Symbol;Acc:HGNC:2218]	-
ENSG00000119326	1374.13	1351.64	1449.71	3254.86	3125.84	3146.09	1391.83	3175.59	-1.19019	1.5823e-60	7.59323e-59	CTNNAL1	9	108942569	109013529	-	3131	protein_coding	catenin alpha like 1 [Source:HGNC Symbol;Acc:HGNC:2512]	-
ENSG00000174442	255.39	253.944	258.018	849.727	965.332	889.131	255.784	901.397	-1.81715	1.661e-60	7.95251e-59	ZWILCH	15	66504959	66550128	+	4849	protein_coding	zwilch kinetochore protein [Source:HGNC Symbol;Acc:HGNC:25468]	-
ENSG00000167656	339.013	286.711	280.977	15.4993	9.38126	18.6159	302.234	14.4988	4.37436	1.84079e-60	8.79304e-59	LY6D	8	142784880	142786592	-	1553	protein_coding	lymphocyte antigen 6 family member D [Source:HGNC Symbol;Acc:HGNC:13348]	-
ENSG00000169184	1240.79	1133.53	1267.13	358.308	368.683	416.642	1213.82	381.211	1.67007	1.87965e-60	8.9581e-59	MN1	22	27748277	27801498	-	7693	protein_coding	MN1 proto-oncogene, transcriptional regulator [Source:HGNC Symbol;Acc:HGNC:7180]	-
ENSG00000126391	2176.46	1999.81	1824.71	722.997	733.614	711.837	2000.33	722.816	1.46848	1.96352e-60	9.33637e-59	FRMD8	11	65386599	65413525	+	4091	protein_coding	FERM domain containing 8 [Source:HGNC Symbol;Acc:HGNC:25462]	-
ENSG00000185567	19184.7	15061.6	18813.4	5358.2	6211.33	6446.42	17686.6	6005.32	1.55827	3.72589e-60	1.76759e-58	AHNAK2	14	104937244	104978357	-	18771	protein_coding	AHNAK nucleoprotein 2 [Source:HGNC Symbol;Acc:HGNC:20125]	-
ENSG00000119333	388.735	432.115	359.694	1569.08	1303.06	1288.93	393.515	1387.02	-1.81659	4.87135e-60	2.30574e-58	WDR34	9	128633661	128656787	-	2604	protein_coding	WD repeat domain 34 [Source:HGNC Symbol;Acc:HGNC:28296]	-
ENSG00000230937	6678.55	7490.34	8217.21	3026.92	2959.79	2756.04	7462.03	2914.25	1.35656	5.09972e-60	2.40834e-58	MIR205HG	1	209428820	209432838	+	3518	processed_transcript	MIR205 host gene [Source:HGNC Symbol;Acc:HGNC:43562]	-
ENSG00000173540	251.999	222.201	228.499	1077.66	901.539	856.332	234.233	945.176	-2.01359	8.33592e-60	3.92771e-58	GMPPB	3	49716844	49723951	-	6742	protein_coding	GDP-mannose pyrophosphorylase B [Source:HGNC Symbol;Acc:HGNC:22932]	-
ENSG00000112081	2199.06	2295.74	2007.29	5120.24	4857.62	4934.1	2167.36	4970.65	-1.19731	1.83951e-59	8.64779e-58	SRSF3	6	36594353	36605600	+	7118	protein_coding	serine and arginine rich splicing factor 3 [Source:HGNC Symbol;Acc:HGNC:10785]	-
ENSG00000124145	11945.7	12421.8	10657.4	5101.1	5275.08	5198.27	11675	5191.48	1.16925	2.06922e-59	9.70569e-58	SDC4	20	45325288	45348424	-	2613	protein_coding	syndecan 4 [Source:HGNC Symbol;Acc:HGNC:10661]	-
ENSG00000035499	160.466	176.123	156.341	677.411	676.389	648.897	164.31	667.566	-2.02114	3.15408e-59	1.47609e-57	DEPDC1B	5	60596912	60700190	-	3806	protein_coding	DEP domain containing 1B [Source:HGNC Symbol;Acc:HGNC:24902]	-
ENSG00000118523	433.936	349.174	412.173	1319.27	1290.86	1216.24	398.427	1275.46	-1.68019	3.86914e-59	1.80667e-57	CTGF	6	131948176	131951373	-	2339	protein_coding	connective tissue growth factor [Source:HGNC Symbol;Acc:HGNC:2500]	-
ENSG00000152518	14604.7	13177.5	13702.3	6790.52	6695.4	6543.05	13828.1	6676.33	1.05043	4.27786e-59	1.99188e-57	ZFP36L2	2	43222402	43226609	-	3696	protein_coding	ZFP36 ring finger protein like 2 [Source:HGNC Symbol;Acc:HGNC:1108]	Others
ENSG00000053747	74413.3	65423.5	79970.2	29943.8	30918.8	31989.2	73269	30950.6	1.24322	4.28495e-59	1.99188e-57	LAMA3	18	23689443	23956222	+	14678	protein_coding	laminin subunit alpha 3 [Source:HGNC Symbol;Acc:HGNC:6483]	-
ENSG00000062822	701.756	631.789	704.083	1995.76	1841.54	1764.08	679.209	1867.13	-1.45952	4.42688e-59	2.05326e-57	POLD1	19	50384204	50418016	+	4932	protein_coding	DNA polymerase delta 1, catalytic subunit [Source:HGNC Symbol;Acc:HGNC:9175]	-
ENSG00000175600	1032.86	1432.53	1098.76	302.692	251.418	266.828	1188.05	273.646	2.11872	4.48884e-59	2.07736e-57	SUGCT	7	40134977	40860763	+	2857	protein_coding	succinyl-CoA:glutarate-CoA transferase [Source:HGNC Symbol;Acc:HGNC:16001]	-
ENSG00000163032	476.878	534.512	465.744	89.349	96.627	95.739	492.378	93.905	2.39114	6.86088e-59	3.16805e-57	VSNL1	2	17539126	17657018	+	3833	protein_coding	visinin like 1 [Source:HGNC Symbol;Acc:HGNC:12722]	-
ENSG00000136450	331.102	260.088	375	1218.98	1289.92	1171.03	322.064	1226.64	-1.93106	7.6872e-59	3.54174e-57	SRSF1	17	58003360	58007346	-	3340	protein_coding	serine and arginine rich splicing factor 1 [Source:HGNC Symbol;Acc:HGNC:10780]	-
ENSG00000164086	6668.38	5954.38	6524.79	2938.49	2688.67	2849.12	6382.52	2825.43	1.17547	9.60731e-59	4.4166e-57	DUSP7	3	52048919	52056550	-	5648	protein_coding	dual specificity phosphatase 7 [Source:HGNC Symbol;Acc:HGNC:3073]	-
ENSG00000163535	110.744	58.3663	95.1167	545.211	669.822	630.282	88.0757	615.105	-2.81061	1.00271e-58	4.59943e-57	SGO2	2	200510008	200583782	+	6022	protein_coding	shugoshin 2 [Source:HGNC Symbol;Acc:HGNC:30812]	-
ENSG00000197043	1331.19	1071.07	1250.73	3686.1	3167.11	3451.04	1217.66	3434.75	-1.49686	1.08583e-58	4.96972e-57	ANXA6	5	151100712	151157882	-	5427	protein_coding	annexin A6 [Source:HGNC Symbol;Acc:HGNC:544]	-
ENSG00000166073	327.712	331.766	367.347	1052.13	1064.77	1047.81	342.275	1054.9	-1.62396	1.4635e-58	6.68354e-57	GPR176	15	39799032	39920892	-	5119	protein_coding	G protein-coupled receptor 176 [Source:HGNC Symbol;Acc:HGNC:32370]	-
ENSG00000130066	15631.9	19271.1	15553.2	6788.7	6439.3	6468.59	16818.7	6565.53	1.35716	3.41992e-58	1.55498e-56	SAT1	X	23783173	23786226	+	2498	protein_coding	spermidine/spermine N1-acetyltransferase 1 [Source:HGNC Symbol;Acc:HGNC:10540]	-
ENSG00000011638	1424.98	1439.7	1282.44	498.713	439.043	477.808	1382.37	471.855	1.55053	4.09681e-58	1.85868e-56	TMEM159	16	21158377	21180616	+	2558	protein_coding	transmembrane protein 159 [Source:HGNC Symbol;Acc:HGNC:30136]	-
ENSG00000150593	3865.88	4178.82	3678.94	1662.99	1691.44	1735.71	3907.88	1696.71	1.20376	6.75315e-58	3.05716e-56	PDCD4	10	110871795	110900006	+	4547	protein_coding	programmed cell death 4 [Source:HGNC Symbol;Acc:HGNC:8763]	-
ENSG00000168685	40.6815	41.9827	56.8514	359.219	407.147	383.842	46.5052	383.403	-3.04397	9.12729e-58	4.12296e-56	IL7R	5	35852695	35879603	+	6060	protein_coding	interleukin 7 receptor [Source:HGNC Symbol;Acc:HGNC:6024]	-
ENSG00000086696	306.242	300.023	282.07	23.7048	29.0819	25.7077	296.112	26.1648	3.50164	1.18231e-57	5.32911e-56	HSD17B2	16	82035004	82098534	+	9550	protein_coding	hydroxysteroid 17-beta dehydrogenase 2 [Source:HGNC Symbol;Acc:HGNC:5211]	-
ENSG00000116161	640.734	720.874	616.619	1825.27	1736.47	1755.21	659.409	1772.32	-1.42553	1.83837e-57	8.26829e-56	CACYBP	1	174999163	175011715	+	4511	protein_coding	calcyclin binding protein [Source:HGNC Symbol;Acc:HGNC:30423]	-
ENSG00000185963	4489.66	4096.9	4133.75	1875.42	1976.63	1877.55	4240.1	1909.87	1.15058	2.45587e-57	1.10217e-55	BICD2	9	92711363	92764812	-	6427	protein_coding	BICD cargo adaptor 2 [Source:HGNC Symbol;Acc:HGNC:17208]	-
ENSG00000104361	1402.38	1268.7	1367.71	471.362	440.919	499.084	1346.26	470.455	1.51604	2.94737e-57	1.3199e-55	NIPAL2	8	98189833	98294393	-	5599	protein_coding	NIPA like domain containing 2 [Source:HGNC Symbol;Acc:HGNC:25854]	-
ENSG00000156453	323.192	280.568	289.723	10.029	3.7525	8.86472	297.828	7.54873	5.29356	3.9837e-57	1.78015e-55	PCDH1	5	141853111	141879246	-	5903	protein_coding	protocadherin 1 [Source:HGNC Symbol;Acc:HGNC:8655]	-
ENSG00000133477	2492.87	2519.99	2307.95	1053.04	939.064	975.119	2440.27	989.075	1.30286	4.17542e-57	1.86183e-55	FAM83F	22	39994949	40043529	+	16389	protein_coding	family with sequence similarity 83 member F [Source:HGNC Symbol;Acc:HGNC:25148]	-
ENSG00000153044	116.394	148.476	116.983	582.592	666.069	588.617	127.284	612.426	-2.26316	5.69043e-57	2.53194e-55	CENPH	5	69189548	69210357	+	2244	protein_coding	centromere protein H [Source:HGNC Symbol;Acc:HGNC:17268]	-
ENSG00000164032	1834.06	2383.8	1673.84	7048.54	6261.99	6079.42	1963.9	6463.32	-1.71806	6.33685e-57	2.81354e-55	H2AFZ	4	99948086	99950388	-	2303	protein_coding	H2A histone family member Z [Source:HGNC Symbol;Acc:HGNC:4741]	-
ENSG00000196584	21.4708	22.5273	33.8922	314.545	376.188	312.038	25.9634	334.257	-3.6871	6.70345e-57	2.96996e-55	XRCC2	7	152644779	152676165	-	4853	protein_coding	X-ray repair cross complementing 2 [Source:HGNC Symbol;Acc:HGNC:12829]	-
ENSG00000277586	459.927	468.978	470.117	87.5255	97.5651	94.8525	466.341	93.3144	2.3215	7.20621e-57	3.18591e-55	NEFL	8	24950955	24957110	-	4329	protein_coding	neurofilament light [Source:HGNC Symbol;Acc:HGNC:7739]	-
ENSG00000136982	30.5111	32.767	32.7989	321.839	313.334	348.383	32.0257	327.852	-3.35494	9.93225e-57	4.38179e-55	DSCC1	8	119833976	119856010	-	2603	protein_coding	DNA replication and sister chromatid cohesion 1 [Source:HGNC Symbol;Acc:HGNC:24453]	-
ENSG00000141424	3565.28	3528.6	3422.02	1642.02	1575.11	1663.91	3505.3	1627.01	1.10719	1.21481e-56	5.348e-55	SLC39A6	18	36108532	36129385	-	3682	protein_coding	solute carrier family 39 member 6 [Source:HGNC Symbol;Acc:HGNC:18607]	-
ENSG00000169710	17082.9	12842.6	16420.2	43916.9	42766.3	40609.3	15448.6	42430.8	-1.45772	1.56542e-56	6.87694e-55	FASN	17	82078333	82098332	-	9364	protein_coding	fatty acid synthase [Source:HGNC Symbol;Acc:HGNC:3594]	-
ENSG00000076003	527.73	575.471	596.94	1483.38	1531.02	1512.32	566.713	1508.91	-1.41232	1.73119e-56	7.58911e-55	MCM6	2	135839626	135876426	-	4118	protein_coding	minichromosome maintenance complex component 6 [Source:HGNC Symbol;Acc:HGNC:6949]	-
ENSG00000091622	1008	898.021	1073.62	263.488	290.819	309.379	993.212	287.895	1.78586	2.79501e-56	1.22268e-54	PITPNM3	17	6451264	6556494	-	10609	protein_coding	PITPNM family member 3 [Source:HGNC Symbol;Acc:HGNC:21043]	-
ENSG00000109971	12961.6	12129.9	12697.5	26817.5	24390.3	25250.3	12596.4	25486	-1.01675	2.82248e-56	1.23211e-54	HSPA8	11	123057489	123063230	-	4849	protein_coding	heat shock protein family A (Hsp70) member 8 [Source:HGNC Symbol;Acc:HGNC:5241]	-
ENSG00000165799	998.958	985.059	1016.77	346.455	306.767	336.859	1000.26	330.027	1.59922	3.74408e-56	1.63099e-54	RNASE7	14	21042226	21044234	+	1499	protein_coding	ribonuclease A family member 7 [Source:HGNC Symbol;Acc:HGNC:19278]	-
ENSG00000100526	15.8206	36.8629	36.0788	369.248	342.416	332.427	29.5874	348.03	-3.54584	5.50014e-56	2.39095e-54	CDKN3	14	54396849	54420218	+	1836	protein_coding	cyclin dependent kinase inhibitor 3 [Source:HGNC Symbol;Acc:HGNC:1791]	-
ENSG00000181192	441.847	425.971	416.546	1175.21	1187.67	1271.2	428.121	1211.36	-1.50089	6.69357e-56	2.90367e-54	DHTKD1	10	12068972	12123225	+	5281	protein_coding	dehydrogenase E1 and transketolase domain containing 1 [Source:HGNC Symbol;Acc:HGNC:23537]	-
ENSG00000067064	1749.31	1709.01	1583.09	3627.75	3697.15	3746.23	1680.47	3690.38	-1.13494	1.0404e-55	4.50383e-54	IDI1	10	1039152	1049170	-	4345	protein_coding	isopentenyl-diphosphate delta isomerase 1 [Source:HGNC Symbol;Acc:HGNC:5387]	-
ENSG00000137959	1316.5	1104.86	1232.14	293.575	379.941	267.715	1217.84	313.744	1.95746	1.12655e-55	4.86666e-54	IFI44L	1	78619922	78646145	+	10240	protein_coding	interferon induced protein 44 like [Source:HGNC Symbol;Acc:HGNC:17817]	-
ENSG00000125538	1376.39	1657.81	1330.54	471.362	456.867	478.695	1454.91	468.975	1.63374	2.07068e-55	8.92668e-54	IL1B	2	112829751	112836903	-	3096	protein_coding	interleukin 1 beta [Source:HGNC Symbol;Acc:HGNC:5992]	-
ENSG00000145604	658.815	656.364	666.91	1611.02	1736.47	1633.77	660.697	1660.42	-1.32943	2.09872e-55	9.02885e-54	SKP2	5	36151989	36184319	+	3837	protein_coding	S-phase kinase associated protein 2 [Source:HGNC Symbol;Acc:HGNC:10901]	-
ENSG00000149573	3141.52	3263.39	2852.41	1172.48	1326.51	1261.45	3085.77	1253.48	1.29991	2.28511e-55	9.8104e-54	MPZL2	11	118253403	118264536	-	4753	protein_coding	myelin protein zero like 2 [Source:HGNC Symbol;Acc:HGNC:3496]	-
ENSG00000117984	1927.85	1766.35	1946.07	683.793	575.071	496.424	1880.09	585.096	1.6842	2.76931e-55	1.18646e-53	CTSD	11	1752752	1764573	-	3126	protein_coding	cathepsin D [Source:HGNC Symbol;Acc:HGNC:2529]	-
ENSG00000108352	1378.65	1268.7	1316.33	472.273	443.734	506.175	1321.23	474.061	1.47797	4.05143e-55	1.7322e-53	RAPGEFL1	17	40177010	40195656	+	5711	protein_coding	Rap guanine nucleotide exchange factor like 1 [Source:HGNC Symbol;Acc:HGNC:17428]	-
ENSG00000158373	282.511	252.92	261.298	15.4993	9.38126	17.7294	265.576	14.2033	4.21818	4.83898e-55	2.06467e-53	HIST1H2BD	6	26158146	26171349	+	871	protein_coding	histone cluster 1 H2B family member d [Source:HGNC Symbol;Acc:HGNC:4747]	-
ENSG00000170385	1841.97	1932.23	1601.68	596.268	670.76	628.509	1791.96	631.845	1.50427	6.32168e-55	2.69177e-53	SLC30A1	1	211571568	211578742	-	5474	protein_coding	solute carrier family 30 member 1 [Source:HGNC Symbol;Acc:HGNC:11012]	-
ENSG00000184164	843.012	833.511	794.826	2566.5	2218.67	2069.03	823.783	2284.73	-1.47163	7.78652e-55	3.30871e-53	CRELD2	22	49918167	49927540	+	5165	protein_coding	cysteine rich with EGF like domains 2 [Source:HGNC Symbol;Acc:HGNC:28150]	-
ENSG00000109787	1858.92	1802.19	1780.98	673.764	712.038	771.231	1814.03	719.011	1.33479	7.98155e-55	3.38467e-53	KLF3	4	38664196	38701042	+	6297	protein_coding	Kruppel like factor 3 [Source:HGNC Symbol;Acc:HGNC:16516]	zf-C2H2
ENSG00000063660	8100.15	7617.31	7798.48	3831.07	3304.08	3351.75	7838.64	3495.63	1.16499	8.13787e-55	3.44393e-53	GPC1	2	240435671	240468078	+	6516	protein_coding	glypican 1 [Source:HGNC Symbol;Acc:HGNC:4449]	-
ENSG00000164087	79.103	90.1093	94.0234	444.921	481.259	461.852	87.7452	462.677	-2.39718	9.10607e-55	3.84583e-53	POC1A	3	52075253	52154690	-	2247	protein_coding	POC1 centriolar protein A [Source:HGNC Symbol;Acc:HGNC:24488]	-
ENSG00000185697	33.9013	27.6472	40.4519	309.986	436.229	354.589	34.0001	366.935	-3.4353	1.12575e-54	4.74484e-53	MYBL1	8	66562175	66614247	-	7239	protein_coding	MYB proto-oncogene like 1 [Source:HGNC Symbol;Acc:HGNC:7547]	MYB
ENSG00000162063	145.775	119.804	122.449	557.975	602.277	556.704	129.343	572.319	-2.14757	1.414e-54	5.94767e-53	CCNF	16	2429394	2458854	+	6309	protein_coding	cyclin F [Source:HGNC Symbol;Acc:HGNC:1591]	-
ENSG00000134108	3146.04	3086.24	2938.78	1255.44	1399.68	1364.28	3057.02	1339.8	1.19015	2.11284e-54	8.86924e-53	ARL8B	3	5122220	5180912	+	3576	protein_coding	ADP ribosylation factor like GTPase 8B [Source:HGNC Symbol;Acc:HGNC:25564]	-
ENSG00000126453	238.439	259.064	271.137	1004.72	883.715	833.284	256.214	907.239	-1.82352	2.61942e-54	1.09736e-52	BCL2L12	19	49665142	49673916	+	2216	protein_coding	BCL2 like 12 [Source:HGNC Symbol;Acc:HGNC:13787]	-
ENSG00000116741	510.779	524.272	487.61	111.23	121.956	108.15	507.554	113.779	2.15829	2.693e-54	1.12591e-52	RGS2	1	192809039	192812283	+	2096	protein_coding	regulator of G protein signaling 2 [Source:HGNC Symbol;Acc:HGNC:9998]	-
ENSG00000111674	94.9236	96.2531	98.3966	468.626	459.682	494.651	96.5244	474.32	-2.29697	3.93393e-54	1.64143e-52	ENO2	12	6913745	6923698	+	4281	protein_coding	enolase 2 [Source:HGNC Symbol;Acc:HGNC:3353]	-
ENSG00000090520	510.779	628.717	507.289	1672.1	1620.14	1537.14	548.929	1609.8	-1.55073	6.4325e-54	2.67858e-52	DNAJB11	3	186567403	186585800	+	5731	protein_coding	DnaJ heat shock protein family (Hsp40) member B11 [Source:HGNC Symbol;Acc:HGNC:14889]	-
ENSG00000140945	4760.87	4520.83	5303.58	2027.68	2159.57	2131.08	4861.76	2106.11	1.20682	6.98695e-54	2.90364e-52	CDH13	16	82626803	83800640	+	11187	protein_coding	cadherin 13 [Source:HGNC Symbol;Acc:HGNC:1753]	-
ENSG00000085840	23.7309	29.6951	38.2654	337.338	301.138	318.243	30.5638	318.907	-3.38154	7.39858e-54	3.06857e-52	ORC1	1	52372829	52404459	-	3157	protein_coding	origin recognition complex subunit 1 [Source:HGNC Symbol;Acc:HGNC:8487]	-
ENSG00000165891	299.461	338.934	345.481	972.81	1006.61	1068.2	327.959	1015.87	-1.63037	7.90271e-54	3.27112e-52	E2F7	12	77021247	77065580	-	6303	protein_coding	E2F transcription factor 7 [Source:HGNC Symbol;Acc:HGNC:23820]	E2F
ENSG00000134324	1169.59	1045.47	1224.49	2745.2	2695.24	2713.49	1146.52	2717.98	-1.24586	1.41279e-53	5.83624e-52	LPIN1	2	11677595	11827409	+	11861	protein_coding	lipin 1 [Source:HGNC Symbol;Acc:HGNC:13345]	-
ENSG00000105255	196.627	127.996	169.461	857.021	697.028	767.685	164.695	773.911	-2.2362	1.73593e-53	7.15691e-52	FSD1	19	4304600	4323843	+	3111	protein_coding	fibronectin type III and SPRY domain containing 1 [Source:HGNC Symbol;Acc:HGNC:13745]	-
ENSG00000125780	415.856	250.873	315.962	5.47035	8.44313	4.43236	327.564	6.11528	5.74953	7.7561e-53	3.19136e-51	TGM3	20	2296001	2341078	+	2693	protein_coding	transglutaminase 3 [Source:HGNC Symbol;Acc:HGNC:11779]	-
ENSG00000151849	138.995	114.685	124.636	557.064	521.598	581.526	126.105	553.396	-2.13611	7.89292e-53	3.24125e-51	CENPJ	13	24882284	24922889	-	5812	protein_coding	centromere protein J [Source:HGNC Symbol;Acc:HGNC:17272]	-
ENSG00000085999	41.8116	34.815	30.6123	382.013	306.767	320.903	35.7463	336.561	-3.23739	8.22439e-53	3.3707e-51	RAD54L	1	46247688	46278473	+	3212	protein_coding	RAD54 like [Source:HGNC Symbol;Acc:HGNC:9826]	-
ENSG00000198830	1918.81	2091.97	1917.64	4302.43	4314.44	4081.32	1976.14	4232.73	-1.09854	1.04898e-52	4.29071e-51	HMGN2	1	26472450	26475972	+	2509	protein_coding	high mobility group nucleosomal binding domain 2 [Source:HGNC Symbol;Acc:HGNC:4986]	-
ENSG00000105968	698.366	823.271	736.881	1974.8	1954.12	1845.63	752.84	1924.85	-1.35331	1.11169e-52	4.53827e-51	H2AFV	7	44826791	44848083	-	4749	protein_coding	H2A histone family member V [Source:HGNC Symbol;Acc:HGNC:20664]	-
ENSG00000171476	494.959	579.567	425.292	78.4083	84.4313	99.2849	499.939	87.3748	2.51616	1.24876e-52	5.08785e-51	HOPX	4	56647988	56681899	-	7753	protein_coding	HOP homeobox [Source:HGNC Symbol;Acc:HGNC:24961]	-
ENSG00000198431	1715.4	1635.28	1513.12	3488.26	3601.47	3670.88	1621.27	3586.87	-1.14572	1.35551e-52	5.51197e-51	TXNRD1	12	104215779	104350305	+	6708	protein_coding	thioredoxin reductase 1 [Source:HGNC Symbol;Acc:HGNC:12437]	-
ENSG00000112977	1430.63	1215.45	1396.14	3764.51	3284.38	3269.31	1347.41	3439.4	-1.35251	1.59149e-52	6.4589e-51	DAP	5	10679230	10761272	-	3361	protein_coding	death associated protein [Source:HGNC Symbol;Acc:HGNC:2672]	-
ENSG00000163808	45.2017	24.5753	40.4519	332.779	330.22	337.746	36.743	333.582	-3.19185	2.42687e-52	9.82999e-51	KIF15	3	44761717	44873376	+	5285	protein_coding	kinesin family member 15 [Source:HGNC Symbol;Acc:HGNC:17273]	-
ENSG00000196230	8356.66	7394.08	8521.15	19153.5	16884.4	17932.4	8090.63	17990.1	-1.15299	2.46893e-52	9.98092e-51	TUBB	6	30720201	30725426	+	3359	protein_coding	tubulin beta class I [Source:HGNC Symbol;Acc:HGNC:20778]	-
ENSG00000052344	3787.9	3425.18	3594.76	1657.51	1417.51	1527.39	3602.61	1534.14	1.23134	2.88941e-52	1.16581e-50	PRSS8	16	31131433	31135762	-	3010	protein_coding	serine protease 8 [Source:HGNC Symbol;Acc:HGNC:9491]	-
ENSG00000214176	855.442	805.864	875.73	243.43	259.861	284.557	845.679	262.616	1.68644	3.49412e-52	1.40706e-50	PLEKHM1P1	17	64779259	64837154	-	8469	transcribed_unprocessed_pseudogene	pleckstrin homology and RUN domain containing M1 pseudogene 1 [Source:HGNC Symbol;Acc:HGNC:35411]	-
ENSG00000121621	23.7309	25.5992	37.1721	277.164	333.973	355.475	28.8341	322.204	-3.48278	3.59934e-52	1.44663e-50	KIF18A	11	28020620	28108308	-	4668	protein_coding	kinesin family member 18A [Source:HGNC Symbol;Acc:HGNC:29441]	-
ENSG00000109674	19.2107	22.5273	25.1458	284.458	303.953	266.828	22.2946	285.08	-3.67444	4.40694e-52	1.7678e-50	NEIL3	4	177309836	177362943	+	2959	protein_coding	nei like DNA glycosylase 3 [Source:HGNC Symbol;Acc:HGNC:24573]	-
ENSG00000131746	13896.1	11834	15059.1	5801.3	5322.93	5506.76	13596.4	5543.66	1.29423	7.13603e-52	2.85702e-50	TNS4	17	40475828	40501597	-	4847	protein_coding	tensin 4 [Source:HGNC Symbol;Acc:HGNC:24352]	-
ENSG00000111348	186.457	130.044	219.752	990.133	785.211	873.175	178.751	882.84	-2.3072	7.81723e-52	3.12374e-50	ARHGDIB	12	14942017	14961728	-	2102	protein_coding	Rho GDP dissociation inhibitor beta [Source:HGNC Symbol;Acc:HGNC:679]	-
ENSG00000149136	2193.41	1958.85	2210.64	4722.73	4519.89	4529.87	2120.97	4590.83	-1.1144	9.56922e-52	3.81648e-50	SSRP1	11	57325985	57335877	-	6323	protein_coding	structure specific recognition protein 1 [Source:HGNC Symbol;Acc:HGNC:11327]	HMG
ENSG00000182963	441.847	438.259	495.263	1208.03	1303.99	1261.45	458.456	1257.83	-1.45627	1.08369e-51	4.31379e-50	GJC1	17	44798448	44830816	-	8660	protein_coding	gap junction protein gamma 1 [Source:HGNC Symbol;Acc:HGNC:4280]	-
ENSG00000111981	411.335	504.817	417.639	84.7904	82.5551	85.1013	444.597	84.1489	2.40222	1.27243e-51	5.05543e-50	ULBP1	6	149964007	149973710	+	3142	protein_coding	UL16 binding protein 1 [Source:HGNC Symbol;Acc:HGNC:14893]	-
ENSG00000144354	439.587	374.773	435.132	1167.92	1239.26	1162.16	416.497	1189.78	-1.51549	1.30393e-51	5.17069e-50	CDCA7	2	173354820	173368997	+	3934	protein_coding	cell division cycle associated 7 [Source:HGNC Symbol;Acc:HGNC:14628]	-
ENSG00000143507	595.532	552.944	577.26	150.435	156.667	133.857	575.245	146.986	1.96907	1.48155e-51	5.85269e-50	DUSP10	1	221701424	221742176	-	2914	protein_coding	dual specificity phosphatase 10 [Source:HGNC Symbol;Acc:HGNC:3065]	-
ENSG00000213694	87.0133	92.1573	97.3033	438.539	447.486	465.398	92.158	450.474	-2.28887	1.52634e-51	6.01817e-50	S1PR3	9	88990863	89005010	+	13578	protein_coding	sphingosine-1-phosphate receptor 3 [Source:HGNC Symbol;Acc:HGNC:3167]	-
ENSG00000120129	1031.73	997.346	784.986	259.841	258.923	258.85	938.021	259.205	1.85557	2.01203e-51	7.91816e-50	DUSP1	5	172768090	172771195	-	2019	protein_coding	dual specificity phosphatase 1 [Source:HGNC Symbol;Acc:HGNC:3064]	-
ENSG00000183763	37.2914	43.0067	34.9855	330.044	310.52	312.038	38.4279	317.534	-3.04386	2.33908e-51	9.18784e-50	TRAIP	3	49828599	49856574	-	3263	protein_coding	TRAF interacting protein [Source:HGNC Symbol;Acc:HGNC:30764]	-
ENSG00000167914	1117.61	810.984	923.835	264.4	211.078	225.164	950.81	233.547	2.02449	2.8659e-51	1.12359e-49	GSDMA	17	39953263	39977766	+	2273	protein_coding	gasdermin A [Source:HGNC Symbol;Acc:HGNC:13311]	-
ENSG00000171552	3236.44	3305.37	3061.23	1492.49	1281.48	1293.36	3201.01	1355.78	1.23945	3.07644e-51	1.20387e-49	BCL2L1	20	31664452	31723989	-	3314	protein_coding	BCL2 like 1 [Source:HGNC Symbol;Acc:HGNC:992]	-
ENSG00000095585	262.17	281.592	259.111	23.7048	26.2675	28.3671	267.624	26.1132	3.357	3.23111e-51	1.26202e-49	BLNK	10	96191702	96271587	-	3655	protein_coding	B cell linker [Source:HGNC Symbol;Acc:HGNC:14211]	-
ENSG00000187134	783.12	882.662	708.456	201.491	129.461	182.613	791.412	171.189	2.20792	3.35939e-51	1.30966e-49	AKR1C1	10	4963253	4983283	+	8765	protein_coding	aldo-keto reductase family 1 member C1 [Source:HGNC Symbol;Acc:HGNC:384]	-
ENSG00000174307	4172.12	4564.86	3547.74	1622.87	1352.78	1395.31	4094.91	1456.98	1.49093	6.52773e-51	2.54007e-49	PHLDA3	1	201464383	201469237	-	3138	protein_coding	pleckstrin homology like domain family A member 3 [Source:HGNC Symbol;Acc:HGNC:8934]	-
ENSG00000136167	90.4034	71.6779	95.1167	450.392	440.919	437.917	85.7327	443.076	-2.3729	7.24323e-51	2.81322e-49	LCP1	13	46125920	46211871	-	5061	protein_coding	lymphocyte cytosolic protein 1 [Source:HGNC Symbol;Acc:HGNC:6528]	-
ENSG00000139433	2468.01	2029.51	2108.97	831.493	838.685	874.061	2202.16	848.079	1.37618	8.76735e-51	3.39882e-49	GLTP	12	109850943	109880488	-	2696	protein_coding	glycolipid transfer protein [Source:HGNC Symbol;Acc:HGNC:24867]	-
ENSG00000167553	2435.24	2359.23	2759.48	6650.12	5818.26	5712.42	2517.98	6060.27	-1.26722	1.09831e-50	4.24986e-49	TUBA1C	12	49188736	49274603	+	4631	protein_coding	tubulin alpha 1c [Source:HGNC Symbol;Acc:HGNC:20768]	-
ENSG00000176208	39.5515	54.2704	66.691	350.102	393.075	400.685	53.5043	381.287	-2.83053	1.21439e-50	4.69032e-49	ATAD5	17	30831970	30895869	+	7075	protein_coding	ATPase family, AAA domain containing 5 [Source:HGNC Symbol;Acc:HGNC:25752]	-
ENSG00000158246	1549.29	1541.07	1403.79	583.504	453.115	488.446	1498.05	508.355	1.559	1.39453e-50	5.36611e-49	TENT5B	1	27005020	27012836	-	2368	protein_coding	terminal nucleotidyltransferase 5B [Source:HGNC Symbol;Acc:HGNC:28273]	-
ENSG00000154642	1466.8	1620.94	1348.03	401.159	502.835	509.721	1478.59	471.239	1.64994	1.45236e-50	5.57829e-49	C21orf91	21	17788967	17819386	-	6235	protein_coding	chromosome 21 open reading frame 91 [Source:HGNC Symbol;Acc:HGNC:16459]	-
ENSG00000102580	954.886	949.22	958.82	2066.88	2139.87	2119.55	954.309	2108.77	-1.1439	1.75876e-50	6.74267e-49	DNAJC3	13	95677139	95794989	+	5591	protein_coding	DnaJ heat shock protein family (Hsp40) member C3 [Source:HGNC Symbol;Acc:HGNC:9439]	-
ENSG00000138658	35.0313	47.1026	57.9447	332.779	370.56	353.702	46.6929	352.347	-2.91303	1.76532e-50	6.75535e-49	ZGRF1	4	112539333	112636995	-	9103	protein_coding	zinc finger GRF-type containing 1 [Source:HGNC Symbol;Acc:HGNC:25654]	-
ENSG00000133110	412.466	480.242	470.117	102.113	93.8126	88.6472	454.275	94.8576	2.26068	2.3965e-50	9.15382e-49	POSTN	13	37562583	37598844	-	5464	protein_coding	periostin [Source:HGNC Symbol;Acc:HGNC:16953]	-
ENSG00000268592	464.448	499.697	382.654	88.4373	83.4932	75.3501	448.933	82.4269	2.44641	2.48022e-50	9.45625e-49	RAET1E-AS1	6	149863494	149919507	+	1210	antisense	RAET1E antisense RNA 1 [Source:NCBI gene;Acc:100652739]	-
ENSG00000115163	20.3408	20.4794	22.9592	276.252	259.861	273.033	21.2598	269.716	-3.66573	2.51951e-50	9.58845e-49	CENPA	2	26764289	26801067	+	1983	protein_coding	centromere protein A [Source:HGNC Symbol;Acc:HGNC:1851]	-
ENSG00000188505	357.093	225.273	245.992	14.5876	11.2575	14.1836	276.119	13.3429	4.36761	3.74066e-50	1.42097e-48	NCCRP1	19	39196961	39201884	+	1978	protein_coding	non-specific cytotoxic cell receptor protein 1 homolog (zebrafish) [Source:HGNC Symbol;Acc:HGNC:33739]	-
ENSG00000129757	284.771	337.91	236.152	27.3517	23.4531	15.9565	286.278	22.2538	3.68912	3.77442e-50	1.43118e-48	CDKN1C	11	2883213	2885773	-	2478	protein_coding	cyclin dependent kinase inhibitor 1C [Source:HGNC Symbol;Acc:HGNC:1786]	-
ENSG00000049130	624.914	765.929	684.403	150.435	185.749	187.932	691.749	174.705	1.98597	4.02466e-50	1.52329e-48	KITLG	12	88492793	88580851	-	6205	protein_coding	KIT ligand [Source:HGNC Symbol;Acc:HGNC:6343]	-
ENSG00000151117	324.322	270.328	287.537	40.1159	26.2675	26.5942	294.062	30.9925	3.24531	4.34403e-50	1.64118e-48	TMEM86A	11	18693122	18704785	+	4243	protein_coding	transmembrane protein 86A [Source:HGNC Symbol;Acc:HGNC:26890]	-
ENSG00000100994	7631.18	6996.78	7481.42	3714.37	3335.04	3599.96	7369.79	3549.79	1.05373	4.60123e-50	1.73519e-48	PYGB	20	25248069	25298014	+	4474	protein_coding	glycogen phosphorylase B [Source:HGNC Symbol;Acc:HGNC:9723]	-
ENSG00000173083	159.336	167.931	150.875	609.032	573.195	662.195	159.381	614.807	-1.94719	4.89134e-50	1.84125e-48	HPSE	4	83292461	83335153	-	4721	protein_coding	heparanase [Source:HGNC Symbol;Acc:HGNC:5164]	-
ENSG00000172548	1745.92	1515.47	1753.65	651.883	634.173	669.286	1671.68	651.781	1.35826	6.61178e-50	2.48438e-48	NIPAL4	5	157460019	157474717	+	4208	protein_coding	NIPA like domain containing 4 [Source:HGNC Symbol;Acc:HGNC:28018]	-
ENSG00000136824	392.125	412.66	430.759	1112.3	1364.97	1210.92	411.848	1229.4	-1.57735	7.8305e-50	2.937e-48	SMC2	9	104094260	104141417	+	6468	protein_coding	structural maintenance of chromosomes 2 [Source:HGNC Symbol;Acc:HGNC:14011]	-
ENSG00000136002	1716.53	1383.38	1551.39	578.945	534.732	553.158	1550.43	555.612	1.4799	8.23784e-50	3.08422e-48	ARHGEF4	2	130836916	131047263	+	10611	protein_coding	Rho guanine nucleotide exchange factor 4 [Source:HGNC Symbol;Acc:HGNC:684]	-
ENSG00000159346	4491.92	4338.56	4418.01	2235.55	2108.91	2256.96	4416.16	2200.47	1.00481	9.53629e-50	3.56393e-48	ADIPOR1	1	202940823	202958572	-	3193	protein_coding	adiponectin receptor 1 [Source:HGNC Symbol;Acc:HGNC:24040]	-
ENSG00000157193	242.959	240.633	291.91	813.258	843.375	897.11	258.501	851.248	-1.71997	1.09113e-49	4.07046e-48	LRP8	1	53242364	53328070	-	10263	protein_coding	LDL receptor related protein 8 [Source:HGNC Symbol;Acc:HGNC:6700]	-
ENSG00000165244	33.9013	17.4075	32.7989	294.487	313.334	286.33	28.0359	298.05	-3.42064	1.147e-49	4.27123e-48	ZNF367	9	96385941	96418329	-	3646	protein_coding	zinc finger protein 367 [Source:HGNC Symbol;Acc:HGNC:18320]	zf-C2H2
ENSG00000106624	323.192	229.369	317.056	1038.45	979.403	1045.15	289.872	1021	-1.81913	1.19911e-49	4.4573e-48	AEBP1	7	44104361	44114562	+	4955	protein_coding	AE binding protein 1 [Source:HGNC Symbol;Acc:HGNC:303]	-
ENSG00000167608	1441.93	1422.29	1447.52	611.767	596.648	559.364	1437.25	589.26	1.28651	1.58003e-49	5.86276e-48	TMC4	19	54160108	54173250	-	3062	protein_coding	transmembrane channel like 4 [Source:HGNC Symbol;Acc:HGNC:22998]	-
ENSG00000177106	3725.75	3778.45	3743.44	1837.12	1561.04	1696.71	3749.21	1698.29	1.14239	2.40509e-49	8.90825e-48	EPS8L2	11	694438	727727	+	5693	protein_coding	EPS8 like 2 [Source:HGNC Symbol;Acc:HGNC:21296]	-
ENSG00000215788	1728.97	1710.03	1737.25	723.909	604.153	563.796	1725.41	630.619	1.45224	2.48082e-49	9.17243e-48	TNFRSF25	1	6460786	6466195	-	4283	protein_coding	TNF receptor superfamily member 25 [Source:HGNC Symbol;Acc:HGNC:11910]	-
ENSG00000182749	1210.28	1188.83	1203.72	490.508	459.682	468.944	1200.94	473.044	1.34396	2.64962e-49	9.77914e-48	PAQR7	1	25861210	25871253	-	3297	protein_coding	progestin and adipoQ receptor family member 7 [Source:HGNC Symbol;Acc:HGNC:23146]	-
ENSG00000159259	174.027	160.763	151.968	603.562	619.163	579.753	162.253	600.826	-1.88923	2.72404e-49	1.0036e-47	CHAF1B	21	36385378	36419015	+	5118	protein_coding	chromatin assembly factor 1 subunit B [Source:HGNC Symbol;Acc:HGNC:1911]	-
ENSG00000149968	303.981	316.407	340.015	4.55862	3.7525	3.54589	320.134	3.95234	6.34058	2.97817e-49	1.09528e-47	MMP3	11	102835801	102843803	-	2048	protein_coding	matrix metallopeptidase 3 [Source:HGNC Symbol;Acc:HGNC:7173]	-
ENSG00000221829	282.511	264.184	255.831	866.138	809.603	800.484	267.509	825.408	-1.62601	3.50783e-49	1.28779e-47	FANCG	9	35073835	35080016	-	3614	protein_coding	FA complementation group G [Source:HGNC Symbol;Acc:HGNC:3588]	-
ENSG00000185347	102.834	93.1812	76.5307	650.059	474.692	473.376	90.8486	532.709	-2.55239	4.30006e-49	1.57585e-47	TEDC1	14	105489855	105499575	+	6698	protein_coding	tubulin epsilon and delta complex 1 [Source:HGNC Symbol;Acc:HGNC:20127]	-
ENSG00000089486	1653.25	1795.02	1669.46	716.615	621.977	706.518	1705.91	681.704	1.3232	6.38909e-49	2.3373e-47	CDIP1	16	4510675	4538828	-	4268	protein_coding	cell death inducing p53 target 1 [Source:HGNC Symbol;Acc:HGNC:13234]	zf-LITAF-like
ENSG00000072501	1148.12	981.987	1175.29	2540.98	2683.04	2678.92	1101.8	2634.31	-1.25827	9.0582e-49	3.30211e-47	SMC1A	X	53374149	53422728	-	10484	protein_coding	structural maintenance of chromosomes 1A [Source:HGNC Symbol;Acc:HGNC:11111]	-
ENSG00000128016	1254.35	1150.94	1271.5	480.479	470.001	433.485	1225.6	461.322	1.40961	9.1316e-49	3.32304e-47	ZFP36	19	39406813	39409412	+	2010	protein_coding	ZFP36 ring finger protein [Source:HGNC Symbol;Acc:HGNC:12862]	-
ENSG00000149090	1497.31	1319.9	1331.63	513.301	463.434	543.407	1382.95	506.714	1.44766	1.22157e-48	4.4376e-47	PAMR1	11	35431823	35530300	-	3863	protein_coding	peptidase domain containing associated with muscle regeneration 1 [Source:HGNC Symbol;Acc:HGNC:24554]	-
ENSG00000135829	1797.9	1728.46	1733.97	3663.31	3448.55	3714.32	1753.44	3608.73	-1.04151	1.47671e-48	5.35508e-47	DHX9	1	182839369	182887751	+	5645	protein_coding	DExH-box helicase 9 [Source:HGNC Symbol;Acc:HGNC:2750]	-
ENSG00000105088	413.596	425.971	393.586	91.1724	83.4932	86.8742	411.051	87.18	2.23719	1.80019e-48	6.51675e-47	OLFM2	19	9853718	9936552	-	2500	protein_coding	olfactomedin 2 [Source:HGNC Symbol;Acc:HGNC:17189]	-
ENSG00000134760	301.721	244.729	263.484	6.38207	2.81438	6.2053	269.978	5.13392	5.70778	2.88268e-48	1.04172e-46	DSG1	18	31318089	31357029	+	5252	protein_coding	desmoglein 1 [Source:HGNC Symbol;Acc:HGNC:3048]	-
ENSG00000129195	19.2107	15.3595	15.3061	298.134	228.903	267.715	16.6255	264.917	-3.99811	3.08741e-48	1.11377e-46	PIMREG	17	6444415	6451469	+	2823	protein_coding	PICALM interacting mitotic regulator [Source:HGNC Symbol;Acc:HGNC:25483]	-
ENSG00000163472	765.039	663.532	630.832	195.109	191.378	198.57	686.468	195.019	1.81492	4.91707e-48	1.76768e-46	TMEM79	1	156282935	156293185	+	3067	protein_coding	transmembrane protein 79 [Source:HGNC Symbol;Acc:HGNC:28196]	-
ENSG00000103187	2816.07	2650.03	2848.04	6602.71	5645.64	5878.2	2771.38	6042.18	-1.12463	6.65133e-48	2.38701e-46	COTL1	16	84565594	84618077	-	6762	protein_coding	coactosin like F-actin binding protein 1 [Source:HGNC Symbol;Acc:HGNC:18304]	-
ENSG00000154096	277.99	278.52	382.654	1278.24	1052.58	1096.57	313.055	1142.46	-1.86813	7.23676e-48	2.59263e-46	THY1	11	119417378	119424985	-	5925	protein_coding	Thy-1 cell surface antigen [Source:HGNC Symbol;Acc:HGNC:11801]	-
ENSG00000172819	1953.84	1695.69	1613.7	700.204	594.772	619.644	1754.41	638.207	1.45853	7.65428e-48	2.73749e-46	RARG	12	53210567	53232980	-	5127	protein_coding	retinoic acid receptor gamma [Source:HGNC Symbol;Acc:HGNC:9866]	THR-like
ENSG00000186591	6468.36	6088.52	5951.9	2930.28	3176.49	3122.15	6169.6	3076.31	1.00393	1.01634e-47	3.62862e-46	UBE2H	7	129830732	129952949	-	6503	protein_coding	ubiquitin conjugating enzyme E2 H [Source:HGNC Symbol;Acc:HGNC:12484]	-
ENSG00000169018	3113.27	3200.93	2932.22	1243.59	1390.3	1444.95	3082.14	1359.61	1.18074	1.04626e-47	3.72905e-46	FEM1B	15	68277803	68295865	+	7569	protein_coding	fem-1 homolog B [Source:HGNC Symbol;Acc:HGNC:3649]	-
ENSG00000172667	1754.96	1772.49	1668.37	621.796	756.129	679.924	1731.94	685.95	1.33658	1.10526e-47	3.93256e-46	ZMAT3	3	179017223	179072279	-	9646	protein_coding	zinc finger matrin-type 3 [Source:HGNC Symbol;Acc:HGNC:29983]	-
ENSG00000161692	84.7532	91.1333	109.33	495.066	470.001	421.074	95.072	462.047	-2.28052	1.42465e-47	5.06031e-46	DBF4B	17	44708608	44752264	+	7146	protein_coding	DBF4 zinc finger B [Source:HGNC Symbol;Acc:HGNC:17883]	-
ENSG00000165312	855.442	832.487	725.948	242.519	185.749	241.12	804.626	223.129	1.84939	1.74295e-47	6.1721e-46	OTUD1	10	23439458	23442390	+	2933	protein_coding	OTU deubiquitinase 1 [Source:HGNC Symbol;Acc:HGNC:27346]	-
ENSG00000111057	3098.58	2920.36	3083.09	7499.84	6451.49	6299.27	3034.01	6750.2	-1.15381	1.7436e-47	6.1721e-46	KRT18	12	52948871	52952901	+	3218	protein_coding	keratin 18 [Source:HGNC Symbol;Acc:HGNC:6430]	-
ENSG00000099783	2571.98	2304.96	2139.58	6056.59	5309.79	5258.55	2338.84	5541.64	-1.24469	1.81101e-47	6.39984e-46	HNRNPM	19	8444767	8489114	+	5614	protein_coding	heterogeneous nuclear ribonucleoprotein M [Source:HGNC Symbol;Acc:HGNC:5046]	-
ENSG00000099204	1895.08	1664.97	1716.47	593.533	708.285	704.745	1758.84	668.854	1.3946	2.72172e-47	9.60181e-46	ABLIM1	10	114431113	114685003	-	10039	protein_coding	actin binding LIM protein 1 [Source:HGNC Symbol;Acc:HGNC:78]	-
ENSG00000079819	696.106	595.95	716.109	1649.31	1988.83	1966.19	669.388	1868.11	-1.48145	3.21943e-47	1.13384e-45	EPB41L2	6	130839347	131063322	-	10320	protein_coding	erythrocyte membrane protein band 4.1 like 2 [Source:HGNC Symbol;Acc:HGNC:3379]	-
ENSG00000146263	131.085	115.709	139.942	504.184	553.494	511.494	128.912	523.057	-2.02208	3.77883e-47	1.3286e-45	MMS22L	6	97142161	97283217	-	21793	protein_coding	MMS22 like, DNA repair protein [Source:HGNC Symbol;Acc:HGNC:21475]	-
ENSG00000267519	1621.61	1643.47	1662.9	669.206	738.305	719.815	1642.66	709.109	1.21207	3.92484e-47	1.3776e-45	AC020916.1	19	13823880	13842928	-	19049	antisense	novel transcript	-
ENSG00000080839	98.3137	74.7498	69.9709	387.483	485.949	496.424	81.0115	456.619	-2.49768	5.4165e-47	1.89797e-45	RBL1	20	36996349	37095995	-	5954	protein_coding	RB transcriptional corepressor like 1 [Source:HGNC Symbol;Acc:HGNC:9893]	-
ENSG00000106976	263.3	238.585	268.951	795.935	757.068	851.899	256.945	801.634	-1.64273	5.8303e-47	2.03952e-45	DNM1	9	128191655	128255248	+	10775	protein_coding	dynamin 1 [Source:HGNC Symbol;Acc:HGNC:2972]	-
ENSG00000189143	534.51	537.584	448.251	113.054	126.647	93.966	506.782	111.222	2.18974	5.96594e-47	2.08347e-45	CLDN4	7	73799542	73832693	+	4702	protein_coding	claudin 4 [Source:HGNC Symbol;Acc:HGNC:2046]	-
ENSG00000116062	919.855	841.703	905.249	1952.91	1965.37	2020.27	888.935	1979.52	-1.15558	7.76052e-47	2.70563e-45	MSH6	2	47695530	47810101	+	10993	protein_coding	mutS homolog 6 [Source:HGNC Symbol;Acc:HGNC:7329]	-
ENSG00000060982	468.968	430.067	511.662	1201.65	1245.83	1273.86	470.232	1240.45	-1.40024	1.25629e-46	4.37261e-45	BCAT1	12	24810022	24949459	-	11775	protein_coding	branched chain amino acid transaminase 1 [Source:HGNC Symbol;Acc:HGNC:976]	-
ENSG00000012822	2089.45	1934.28	2200.8	918.106	870.581	922.817	2074.84	903.835	1.19848	1.68999e-46	5.87231e-45	CALCOCO1	12	53708517	53727745	-	8898	protein_coding	calcium binding and coiled-coil domain 1 [Source:HGNC Symbol;Acc:HGNC:29306]	-
ENSG00000069020	2938.11	2567.09	2899.42	1009.28	1200.8	1195.85	2801.54	1135.31	1.30292	1.80161e-46	6.24968e-45	MAST4	5	66596361	67169595	+	14675	protein_coding	microtubule associated serine/threonine kinase family member 4 [Source:HGNC Symbol;Acc:HGNC:19037]	-
ENSG00000160685	1735.75	1591.25	1565.6	678.323	534.732	609.893	1630.86	607.649	1.42381	3.68298e-46	1.27548e-44	ZBTB7B	1	155002630	155018522	+	4303	protein_coding	zinc finger and BTB domain containing 7B [Source:HGNC Symbol;Acc:HGNC:18668]	ZBTB
ENSG00000140451	25.991	13.3116	36.0788	352.837	313.334	257.077	25.1271	307.749	-3.62422	4.86444e-46	1.68183e-44	PIF1	15	64815632	64825668	-	4656	protein_coding	PIF1 5'-to-3' DNA helicase [Source:HGNC Symbol;Acc:HGNC:26220]	-
ENSG00000175984	873.523	949.22	898.689	272.606	339.602	281.898	907.144	298.035	1.60695	6.05314e-46	2.08587e-44	DENND2C	1	114582848	114670422	-	7413	protein_coding	DENN domain containing 2C [Source:HGNC Symbol;Acc:HGNC:24748]	-
ENSG00000181467	3751.74	4166.53	3478.87	1737.75	1678.31	1713.55	3799.05	1709.87	1.15192	7.50816e-46	2.58298e-44	RAP2B	3	153162270	153170620	+	8351	protein_coding	RAP2B, member of RAS oncogene family [Source:HGNC Symbol;Acc:HGNC:9862]	-
ENSG00000168264	3100.84	3106.72	2692.79	1340.23	1333.08	1226.88	2966.78	1300.06	1.19052	8.88878e-46	3.05289e-44	IRF2BP2	1	234604269	234609525	-	4724	protein_coding	interferon regulatory factor 2 binding protein 2 [Source:HGNC Symbol;Acc:HGNC:21729]	-
ENSG00000086544	1600.14	1607.63	1529.52	682.882	540.36	584.185	1579.1	602.476	1.38995	1.0718e-45	3.67508e-44	ITPKC	19	40717103	40740860	+	3385	protein_coding	inositol-trisphosphate 3-kinase C [Source:HGNC Symbol;Acc:HGNC:14897]	-
ENSG00000123384	7115.88	5659.48	6795.93	2398.75	2718.69	2799.48	6523.76	2638.97	1.30555	1.38496e-45	4.74102e-44	LRP1	12	57128493	57213351	+	20839	protein_coding	LDL receptor related protein 1 [Source:HGNC Symbol;Acc:HGNC:6692]	-
ENSG00000112029	66.6725	45.0547	55.7581	336.426	335.849	359.908	55.8284	344.061	-2.62913	1.39015e-45	4.75099e-44	FBXO5	6	152970519	152983579	-	3833	protein_coding	F-box protein 5 [Source:HGNC Symbol;Acc:HGNC:13584]	-
ENSG00000178038	4122.4	3815.31	4209.19	2050.47	1889.39	1859.82	4048.96	1933.22	1.06643	1.39838e-45	4.77127e-44	ALS2CL	3	46668997	46693704	-	9057	protein_coding	ALS2 C-terminal like [Source:HGNC Symbol;Acc:HGNC:20605]	-
ENSG00000167306	423.766	301.047	359.694	49.2331	61.9163	55.8477	361.502	55.6657	2.69866	1.45862e-45	4.96864e-44	MYO5B	18	49822813	50195093	-	10488	protein_coding	myosin VB [Source:HGNC Symbol;Acc:HGNC:7603]	-
ENSG00000163209	419.246	266.232	265.671	1.82345	5.62876	4.43236	317.05	3.96152	6.32503	2.08733e-45	7.09862e-44	SPRR3	1	153001747	153003856	+	1441	protein_coding	small proline rich protein 3 [Source:HGNC Symbol;Acc:HGNC:11268]	-
ENSG00000131473	6475.14	5367.65	6627.56	13394.1	13663.8	13575.4	6156.78	13544.5	-1.13763	2.2453e-45	7.62339e-44	ACLY	17	41866908	41930542	-	5217	protein_coding	ATP citrate lyase [Source:HGNC Symbol;Acc:HGNC:115]	-
ENSG00000226145	26417	25244.9	31192.8	12788.8	10824.1	11659.8	27618.3	11757.5	1.23201	3.30053e-45	1.11879e-43	KRT16P6	17	16817983	16822579	-	1906	transcribed_unprocessed_pseudogene	keratin 16 pseudogene 6 [Source:HGNC Symbol;Acc:HGNC:50719]	-
ENSG00000171867	15911	17720.8	14256.6	7322.06	7408.38	7415.34	15962.8	7381.93	1.1127	4.51985e-45	1.52961e-43	PRNP	20	4686236	4701590	+	2851	protein_coding	prion protein [Source:HGNC Symbol;Acc:HGNC:9449]	-
ENSG00000168209	4653.52	4800.37	4143.59	2161.7	1910.96	1825.25	4532.49	1965.97	1.20518	5.61419e-45	1.89687e-43	DDIT4	10	72273920	72276036	+	2058	protein_coding	DNA damage inducible transcript 4 [Source:HGNC Symbol;Acc:HGNC:24944]	-
ENSG00000057657	489.308	524.272	472.304	122.171	132.276	135.63	495.295	130.026	1.92974	5.64548e-45	1.90434e-43	PRDM1	6	106086320	106109939	+	6392	protein_coding	PR/SET domain 1 [Source:HGNC Symbol;Acc:HGNC:9346]	zf-C2H2
ENSG00000104884	605.703	633.837	590.38	1611.02	1410	1471.54	609.973	1497.52	-1.29547	5.68432e-45	1.91433e-43	ERCC2	19	45349837	45370918	-	6450	protein_coding	ERCC excision repair 2, TFIIH core complex helicase subunit [Source:HGNC Symbol;Acc:HGNC:3434]	-
ENSG00000100629	36.1614	27.6472	20.7726	258.93	272.995	270.374	28.1937	267.433	-3.24919	5.69758e-45	1.9157e-43	CEP128	14	80476983	80959517	-	9400	protein_coding	centrosomal protein 128 [Source:HGNC Symbol;Acc:HGNC:20359]	-
ENSG00000183111	545.811	489.457	529.155	101.201	146.348	121.447	521.474	122.999	2.08465	6.74997e-45	2.26588e-43	ARHGEF37	5	149551947	149634968	+	5324	protein_coding	Rho guanine nucleotide exchange factor 37 [Source:HGNC Symbol;Acc:HGNC:34430]	-
ENSG00000104687	635.084	660.46	618.805	1474.26	1487.87	1445.84	638.117	1469.32	-1.20287	6.90028e-45	2.31259e-43	GSR	8	30678061	30727999	-	3760	protein_coding	glutathione-disulfide reductase [Source:HGNC Symbol;Acc:HGNC:4623]	-
ENSG00000131462	839.622	707.563	897.596	2200.9	1956.93	2148.81	814.927	2102.21	-1.36809	8.49183e-45	2.84141e-43	TUBG1	17	42609676	42615234	+	2411	protein_coding	tubulin gamma 1 [Source:HGNC Symbol;Acc:HGNC:12417]	-
ENSG00000131016	3007.04	2653.1	3034.99	5800.39	6614.73	6475.68	2898.38	6296.93	-1.11965	1.08277e-44	3.61718e-43	AKAP12	6	151239999	151358557	+	8741	protein_coding	A-kinase anchoring protein 12 [Source:HGNC Symbol;Acc:HGNC:370]	-
ENSG00000168453	1200.11	1084.38	1149.05	464.068	398.703	440.577	1144.51	434.449	1.39677	1.38453e-44	4.61045e-43	HR	8	22114415	22133384	-	8784	protein_coding	HR, lysine demethylase and nuclear receptor corepressor [Source:HGNC Symbol;Acc:HGNC:5172]	-
ENSG00000185885	2671.42	2533.3	3088.56	1198.92	1004.73	1088.59	2764.43	1097.41	1.33262	1.90866e-44	6.34562e-43	IFITM1	11	313506	315272	+	1080	protein_coding	interferon induced transmembrane protein 1 [Source:HGNC Symbol;Acc:HGNC:5412]	-
ENSG00000148019	272.34	255.992	209.913	744.879	899.663	896.223	246.082	846.922	-1.78323	1.95924e-44	6.49299e-43	CEP78	9	78236062	78279690	+	14355	protein_coding	centrosomal protein 78 [Source:HGNC Symbol;Acc:HGNC:25740]	-
ENSG00000178372	296.071	293.879	185.86	17.3228	6.56688	17.7294	258.604	13.873	4.21318	2.66717e-44	8.81985e-43	CALML5	10	5498697	5499555	-	859	protein_coding	calmodulin like 5 [Source:HGNC Symbol;Acc:HGNC:18180]	-
ENSG00000097046	140.125	117.756	125.729	481.39	494.392	510.608	127.87	495.464	-1.95612	2.66985e-44	8.81985e-43	CDC7	1	91500893	91525764	+	3557	protein_coding	cell division cycle 7 [Source:HGNC Symbol;Acc:HGNC:1745]	-
ENSG00000167106	867.873	866.278	799.199	312.721	288.005	304.946	844.45	301.891	1.48379	2.76055e-44	9.10499e-43	FAM102A	9	127940579	127980513	-	6100	protein_coding	family with sequence similarity 102 member A [Source:HGNC Symbol;Acc:HGNC:31419]	-
ENSG00000152253	9.04034	14.3356	16.3994	211.52	249.541	238.461	13.2585	233.174	-4.13031	4.09274e-44	1.34562e-42	SPC25	2	168834132	168913371	-	1841	protein_coding	SPC25, NDC80 kinetochore complex component [Source:HGNC Symbol;Acc:HGNC:24031]	-
ENSG00000171345	4124.66	3769.23	3845.12	1910.97	1612.64	1562.85	3913	1695.49	1.20651	6.18833e-44	2.02819e-42	KRT19	17	41523617	41528308	-	2336	protein_coding	keratin 19 [Source:HGNC Symbol;Acc:HGNC:6436]	-
ENSG00000164484	805.72	734.186	825.438	1744.13	1768.37	1825.25	788.448	1779.25	-1.17484	6.96774e-44	2.28004e-42	TMEM200A	6	130365734	130443063	+	6137	protein_coding	transmembrane protein 200A [Source:HGNC Symbol;Acc:HGNC:21075]	-
ENSG00000171298	3417.25	2980.78	3366.26	1527.14	1506.63	1558.42	3254.76	1530.73	1.08801	7.88007e-44	2.57453e-42	GAA	17	80101556	80119879	+	5156	protein_coding	glucosidase alpha, acid [Source:HGNC Symbol;Acc:HGNC:4065]	-
ENSG00000170345	771.819	774.121	617.712	203.315	223.274	204.775	721.217	210.454	1.77748	1.00014e-43	3.26246e-42	FOS	14	75278774	75282230	+	3238	protein_coding	Fos proto-oncogene, AP-1 transcription factor subunit [Source:HGNC Symbol;Acc:HGNC:3796]	TF_bZIP
ENSG00000178295	128.825	144.38	207.726	628.178	712.038	737.545	160.31	692.587	-2.11116	1.02674e-43	3.34398e-42	GEN1	2	17753858	17788941	+	11827	protein_coding	GEN1, Holliday junction 5' flap endonuclease [Source:HGNC Symbol;Acc:HGNC:26881]	-
ENSG00000141401	1073.54	921.573	924.928	362.866	334.911	346.611	973.347	348.129	1.48271	1.44954e-43	4.71361e-42	IMPA2	18	11981025	12030883	+	3825	protein_coding	inositol monophosphatase 2 [Source:HGNC Symbol;Acc:HGNC:6051]	-
ENSG00000125885	211.318	215.034	177.114	650.059	760.82	659.535	201.155	690.138	-1.77779	1.8962e-43	6.14684e-42	MCM8	20	5950652	5998977	+	7691	protein_coding	minichromosome maintenance 8 homologous recombination repair factor [Source:HGNC Symbol;Acc:HGNC:16147]	-
ENSG00000171793	769.559	772.073	871.357	2008.53	1828.41	1813.72	804.33	1883.55	-1.22771	2.23662e-43	7.23904e-42	CTPS1	1	40979335	41012565	+	11517	protein_coding	CTP synthase 1 [Source:HGNC Symbol;Acc:HGNC:2519]	-
ENSG00000183287	202.278	154.619	178.207	610.855	638.864	607.233	178.368	618.984	-1.79759	2.62069e-43	8.46895e-42	CCBE1	18	59430939	59697662	-	6753	protein_coding	collagen and calcium binding EGF domains 1 [Source:HGNC Symbol;Acc:HGNC:29426]	-
ENSG00000223865	38.4214	32.767	37.1721	289.017	268.304	261.509	36.1202	272.943	-2.92026	2.90916e-43	9.38654e-42	HLA-DPB1	6	33075926	33087201	+	2791	protein_coding	major histocompatibility complex, class II, DP beta 1 [Source:HGNC Symbol;Acc:HGNC:4940]	-
ENSG00000154920	15.8206	24.5753	24.0525	253.459	244.851	225.164	21.4828	241.158	-3.48224	3.20801e-43	1.03348e-41	EME1	17	50373220	50381483	+	3294	protein_coding	essential meiotic structure-specific endonuclease 1 [Source:HGNC Symbol;Acc:HGNC:24965]	-
ENSG00000137337	348.053	314.359	425.292	1033.9	1121.06	1085.04	362.568	1080	-1.57566	3.65488e-43	1.17562e-41	MDC1	6	30699807	30717889	-	8064	protein_coding	mediator of DNA damage checkpoint 1 [Source:HGNC Symbol;Acc:HGNC:21163]	-
ENSG00000143401	615.873	677.868	596.94	1465.14	1676.43	1514.98	630.227	1552.18	-1.29955	4.39655e-43	1.41199e-41	ANP32E	1	150218417	150236156	-	3605	protein_coding	acidic nuclear phosphoprotein 32 family member E [Source:HGNC Symbol;Acc:HGNC:16673]	-
ENSG00000154760	37.2914	45.0547	74.3441	349.19	387.446	344.838	52.2301	360.491	-2.7867	5.55417e-43	1.78102e-41	SLFN13	17	35435096	35448837	-	9329	protein_coding	schlafen family member 13 [Source:HGNC Symbol;Acc:HGNC:26481]	-
ENSG00000162545	1856.66	1792.97	1669.46	790.465	820.86	765.912	1773.03	792.412	1.16204	5.94983e-43	1.90495e-41	CAMK2N1	1	20482391	20486220	-	2615	protein_coding	calcium/calmodulin dependent protein kinase II inhibitor 1 [Source:HGNC Symbol;Acc:HGNC:24190]	-
ENSG00000123737	271.21	306.167	299.563	817.817	821.798	810.235	292.313	816.617	-1.4811	6.55819e-43	2.0965e-41	EXOSC9	4	121801317	121817021	+	4711	protein_coding	exosome component 9 [Source:HGNC Symbol;Acc:HGNC:9137]	-
ENSG00000128346	548.071	503.793	449.345	126.73	124.771	137.403	500.403	129.635	1.94785	7.03378e-43	2.24508e-41	C22orf23	22	37943050	37953669	-	2299	protein_coding	chromosome 22 open reading frame 23 [Source:HGNC Symbol;Acc:HGNC:18589]	-
ENSG00000253368	2385.52	2506.68	2382.29	1182.51	1005.67	986.643	2424.83	1058.27	1.19631	9.57372e-43	3.05111e-41	TRNP1	1	26993707	27000898	+	1976	protein_coding	TMF1-regulated nuclear protein 1 [Source:HGNC Symbol;Acc:HGNC:34348]	-
ENSG00000166886	1826.15	1793.99	1689.14	840.61	781.459	770.344	1769.76	797.471	1.15008	1.04915e-42	3.33847e-41	NAB2	12	57088894	57095476	+	3010	protein_coding	NGFI-A binding protein 2 [Source:HGNC Symbol;Acc:HGNC:7627]	-
ENSG00000197565	2656.73	2444.22	2545.19	1096.8	1214.87	1241.06	2548.71	1184.25	1.10557	1.22169e-42	3.88158e-41	COL4A6	X	108155607	108439497	-	9282	protein_coding	collagen type IV alpha 6 chain [Source:HGNC Symbol;Acc:HGNC:2208]	-
ENSG00000178947	222.618	240.633	239.432	23.7048	28.1438	30.14	234.228	27.3296	3.09907	1.6421e-42	5.20936e-41	SMIM10L2A	X	135421943	135428074	+	5230	protein_coding	small integral membrane protein 10 like 2A [Source:HGNC Symbol;Acc:HGNC:34499]	-
ENSG00000101311	6119.18	5030.76	6184.77	2432.48	2534.82	2669.17	5778.24	2545.49	1.18247	2.36274e-42	7.47267e-41	FERMT1	20	6074845	6123544	-	5359	protein_coding	fermitin family member 1 [Source:HGNC Symbol;Acc:HGNC:15889]	-
ENSG00000132031	105.094	121.852	131.195	476.832	492.516	449.441	119.381	472.93	-1.98462	2.41591e-42	7.62922e-41	MATN3	2	19992111	20012694	-	3118	protein_coding	matrilin 3 [Source:HGNC Symbol;Acc:HGNC:6909]	-
ENSG00000112096	2567.46	2689.97	2311.23	1044.84	1187.67	1103.66	2522.88	1112.05	1.18214	2.63748e-42	8.31626e-41	SOD2	6	159669057	159745186	-	16493	protein_coding	superoxide dismutase 2 [Source:HGNC Symbol;Acc:HGNC:11180]	-
ENSG00000121858	566.151	520.176	526.969	138.582	151.038	168.43	537.765	152.683	1.81546	2.6809e-42	8.44037e-41	TNFSF10	3	172505508	172523507	-	3473	protein_coding	TNF superfamily member 10 [Source:HGNC Symbol;Acc:HGNC:11925]	-
ENSG00000041353	545.811	641.005	522.595	89.349	136.028	144.495	569.804	123.291	2.20863	3.02832e-42	9.51973e-41	RAB27B	18	54717860	54895516	+	7432	protein_coding	RAB27B, member RAS oncogene family [Source:HGNC Symbol;Acc:HGNC:9767]	-
ENSG00000040275	190.977	185.338	204.446	607.208	598.524	639.146	193.587	614.96	-1.66815	3.76625e-42	1.18216e-40	SPDL1	5	169583634	169604778	+	4777	protein_coding	spindle apparatus coiled-coil protein 1 [Source:HGNC Symbol;Acc:HGNC:26010]	-
ENSG00000072274	871.263	772.073	776.24	1784.24	1779.62	1800.42	806.525	1788.1	-1.14928	4.01966e-42	1.2598e-40	TFRC	3	196027183	196082189	-	7887	protein_coding	transferrin receptor [Source:HGNC Symbol;Acc:HGNC:11763]	-
ENSG00000111581	665.595	659.436	645.045	1469.7	1583.56	1437.86	656.692	1497.04	-1.18868	5.50675e-42	1.72326e-40	NUP107	12	68686734	68745809	+	8320	protein_coding	nucleoporin 107 [Source:HGNC Symbol;Acc:HGNC:29914]	-
ENSG00000142178	1157.16	916.453	889.943	244.342	271.118	157.792	987.853	224.418	2.13921	6.50761e-42	2.03341e-40	SIK1	21	43414483	43427189	-	5268	protein_coding	salt inducible kinase 1 [Source:HGNC Symbol;Acc:HGNC:11142]	-
ENSG00000133195	862.222	859.11	839.651	323.662	337.725	318.243	853.661	326.544	1.38667	6.59095e-42	2.05636e-40	SLC39A11	17	72645949	73092712	-	5583	protein_coding	solute carrier family 39 member 11 [Source:HGNC Symbol;Acc:HGNC:14463]	-
ENSG00000158125	1985.48	1655.76	2007.29	784.995	790.84	757.047	1882.84	777.627	1.27543	7.00065e-42	2.18091e-40	XDH	2	31334321	31414715	-	6037	protein_coding	xanthine dehydrogenase [Source:HGNC Symbol;Acc:HGNC:12805]	-
ENSG00000119986	845.272	1057.76	802.479	298.134	236.408	252.644	901.837	262.395	1.78158	7.24445e-42	2.25011e-40	AVPI1	10	97677424	97687323	-	1457	protein_coding	arginine vasopressin induced 1 [Source:HGNC Symbol;Acc:HGNC:30898]	-
ENSG00000197608	583.102	668.652	637.391	159.552	195.13	201.229	629.715	185.304	1.76516	7.56547e-42	2.34631e-40	ZNF841	19	52064466	52095765	-	4287	protein_coding	zinc finger protein 841 [Source:HGNC Symbol;Acc:HGNC:27611]	zf-C2H2
ENSG00000159871	475.748	269.304	375	47.4097	48.7825	53.1883	373.351	49.7935	2.90448	1.0872e-41	3.36677e-40	LYPD5	19	43795929	43827206	-	5091	protein_coding	LY6/PLAUR domain containing 5 [Source:HGNC Symbol;Acc:HGNC:26397]	-
ENSG00000069011	791.03	834.535	606.779	223.372	184.811	188.819	744.115	199.001	1.90298	1.14345e-41	3.53568e-40	PITX1	5	135027735	135034813	-	3511	protein_coding	paired like homeodomain 1 [Source:HGNC Symbol;Acc:HGNC:9004]	Homeobox
ENSG00000114796	802.33	849.895	763.12	222.461	281.438	281.898	805.115	261.932	1.62026	1.15748e-41	3.57374e-40	KLHL24	3	183635568	183684477	+	8650	protein_coding	kelch like family member 24 [Source:HGNC Symbol;Acc:HGNC:25947]	-
ENSG00000159200	1557.2	1777.61	1444.24	660.088	629.482	638.26	1593.02	642.61	1.31013	1.21868e-41	3.75711e-40	RCAN1	21	34513142	34615142	-	6990	protein_coding	regulator of calcineurin 1 [Source:HGNC Symbol;Acc:HGNC:3040]	-
ENSG00000148344	235.049	240.633	250.365	34.6455	30.02	32.7995	242.015	32.4883	2.89644	1.40675e-41	4.33049e-40	PTGES	9	129738331	129753047	-	1896	protein_coding	prostaglandin E synthase [Source:HGNC Symbol;Acc:HGNC:9599]	-
ENSG00000091592	2499.65	2504.63	2685.13	1288.27	1281.48	1224.22	2563.14	1264.65	1.01924	1.74199e-41	5.35455e-40	NLRP1	17	5499427	5619424	-	12808	protein_coding	NLR family pyrin domain containing 1 [Source:HGNC Symbol;Acc:HGNC:14374]	-
ENSG00000174136	236.179	262.136	220.846	780.436	727.048	688.789	239.72	732.091	-1.60937	1.94699e-41	5.97371e-40	RGMB	5	98768650	98798643	+	6671	protein_coding	repulsive guidance molecule BMP co-receptor b [Source:HGNC Symbol;Acc:HGNC:26896]	-
ENSG00000213903	1782.08	1592.27	1762.39	789.553	727.986	759.706	1712.25	759.082	1.1731	1.94917e-41	5.97371e-40	LTB4R	14	24311450	24318036	+	4465	protein_coding	leukotriene B4 receptor [Source:HGNC Symbol;Acc:HGNC:6713]	-
ENSG00000131351	55.3721	66.558	65.5977	357.396	310.52	335.086	62.5093	334.334	-2.41714	2.47586e-41	7.5767e-40	HAUS8	19	17049729	17075625	-	5533	protein_coding	HAUS augmin like complex subunit 8 [Source:HGNC Symbol;Acc:HGNC:30532]	-
ENSG00000185950	1531.21	1630.16	1516.4	676.499	723.295	712.723	1559.26	704.173	1.14715	2.69497e-41	8.23511e-40	IRS2	13	109752698	109786568	-	8138	protein_coding	insulin receptor substrate 2 [Source:HGNC Symbol;Acc:HGNC:6126]	-
ENSG00000143815	624.914	699.371	642.858	1452.38	1615.45	1519.41	655.714	1529.08	-1.22071	2.73604e-41	8.34835e-40	LBR	1	225401502	225428925	-	5257	protein_coding	lamin B receptor [Source:HGNC Symbol;Acc:HGNC:6518]	-
ENSG00000168907	592.142	478.194	525.875	154.081	144.471	138.29	532.07	145.614	1.86883	2.96081e-41	9.02091e-40	PLA2G4F	15	42139034	42156636	-	6103	protein_coding	phospholipase A2 group IVF [Source:HGNC Symbol;Acc:HGNC:27396]	-
ENSG00000168077	421.506	324.598	440.598	1154.24	1103.24	1152.41	395.567	1136.63	-1.52461	3.13607e-41	9.54091e-40	SCARA3	8	27633868	27676776	+	4031	protein_coding	scavenger receptor class A member 3 [Source:HGNC Symbol;Acc:HGNC:19000]	-
ENSG00000146143	92.6635	97.2771	108.236	412.099	396.827	434.371	99.3923	414.433	-2.05994	3.38938e-41	1.02965e-39	PRIM2	6	57314805	57646849	+	4667	protein_coding	DNA primase subunit 2 [Source:HGNC Symbol;Acc:HGNC:9370]	-
ENSG00000106268	192.107	235.513	186.954	706.586	653.874	646.238	204.858	668.899	-1.70494	3.76462e-41	1.14031e-39	NUDT1	7	2242222	2251146	+	2093	protein_coding	nudix hydrolase 1 [Source:HGNC Symbol;Acc:HGNC:8048]	-
ENSG00000173482	324.322	324.598	312.683	69.2911	59.1019	64.7124	320.534	64.3685	2.31546	3.88645e-41	1.1755e-39	PTPRM	18	7566782	8406861	+	9900	protein_coding	protein tyrosine phosphatase, receptor type M [Source:HGNC Symbol;Acc:HGNC:9675]	-
ENSG00000072210	2510.95	2366.39	2358.24	1140.57	1180.16	1227.76	2411.86	1182.83	1.02767	4.51006e-41	1.36213e-39	ALDH3A2	17	19648136	19677598	+	6457	protein_coding	aldehyde dehydrogenase 3 family member A2 [Source:HGNC Symbol;Acc:HGNC:403]	-
ENSG00000177602	38.4214	21.5034	25.1458	287.193	225.15	289.876	28.3569	267.407	-3.24627	5.10746e-41	1.54032e-39	HASPIN	17	3723903	3726699	+	2797	protein_coding	histone H3 associated protein kinase [Source:HGNC Symbol;Acc:HGNC:19682]	-
ENSG00000130940	699.496	604.142	573.98	189.639	191.378	194.137	625.873	191.718	1.70631	5.47057e-41	1.64743e-39	CASZ1	1	10636604	10796650	-	11336	protein_coding	castor zinc finger 1 [Source:HGNC Symbol;Acc:HGNC:26002]	Others
ENSG00000163781	503.999	448.499	545.555	1196.18	1334.01	1294.25	499.351	1274.82	-1.35301	5.94393e-41	1.78739e-39	TOPBP1	3	133598175	133662380	-	7304	protein_coding	DNA topoisomerase II binding protein 1 [Source:HGNC Symbol;Acc:HGNC:17008]	-
ENSG00000137563	461.057	474.098	449.345	1086.78	1089.16	1127.59	461.5	1101.18	-1.25443	6.86553e-41	2.06154e-39	GGH	8	63015079	63039171	-	3130	protein_coding	gamma-glutamyl hydrolase [Source:HGNC Symbol;Acc:HGNC:4248]	-
ENSG00000101945	83.6232	77.8217	90.7436	424.864	365.869	368.772	84.0628	386.502	-2.20213	6.9457e-41	2.08261e-39	SUV39H1	X	48695554	48709012	+	3368	protein_coding	suppressor of variegation 3-9 homolog 1 [Source:HGNC Symbol;Acc:HGNC:11479]	-
ENSG00000003402	1947.06	1911.75	1969.03	929.959	968.146	949.411	1942.61	949.172	1.03324	7.40077e-41	2.21586e-39	CFLAR	2	201116104	201176687	+	22529	protein_coding	CASP8 and FADD like apoptosis regulator [Source:HGNC Symbol;Acc:HGNC:1876]	-
ENSG00000078018	455.407	489.457	423.105	120.348	118.204	126.765	455.99	121.772	1.90485	8.78794e-41	2.6274e-39	MAP2	2	209424058	209734118	+	11559	protein_coding	microtubule associated protein 2 [Source:HGNC Symbol;Acc:HGNC:6839]	-
ENSG00000198742	2205.84	2002.88	2278.43	997.426	1023.5	1017.67	2162.39	1012.86	1.09392	9.93312e-41	2.96552e-39	SMURF1	7	99027438	99144100	-	6276	protein_coding	SMAD specific E3 ubiquitin protein ligase 1 [Source:HGNC Symbol;Acc:HGNC:16807]	-
ENSG00000130713	405.685	359.413	384.84	1022.95	998.166	937.887	383.313	986.336	-1.3644	1.05453e-40	3.14377e-39	EXOSC2	9	130693721	130704894	+	4240	protein_coding	exosome component 2 [Source:HGNC Symbol;Acc:HGNC:17097]	-
ENSG00000170522	717.577	691.179	756.561	1571.81	1554.47	1597.42	721.772	1574.57	-1.12572	1.27912e-40	3.80609e-39	ELOVL6	4	110045846	110199199	-	7297	protein_coding	ELOVL fatty acid elongase 6 [Source:HGNC Symbol;Acc:HGNC:15829]	-
ENSG00000116133	4847.88	3893.13	4882.66	10194	9715.23	10104.9	4541.22	10004.7	-1.13978	1.28036e-40	3.80609e-39	DHCR24	1	54849627	54887271	-	6290	protein_coding	24-dehydrocholesterol reductase [Source:HGNC Symbol;Acc:HGNC:2859]	-
ENSG00000100714	1000.09	970.723	1143.59	2412.42	2198.03	2342.06	1038.13	2317.5	-1.1589	1.63944e-40	4.86655e-39	MTHFD1	14	64388031	64463457	+	9377	protein_coding	methylenetetrahydrofolate dehydrogenase, cyclohydrolase and formyltetrahydrofolate synthetase 1 [Source:HGNC Symbol;Acc:HGNC:7432]	-
ENSG00000134222	44.0717	43.0067	59.038	304.516	294.572	288.99	48.7055	296.026	-2.60484	1.80814e-40	5.35966e-39	PSRC1	1	109279556	109283186	-	2855	protein_coding	proline and serine rich coiled-coil 1 [Source:HGNC Symbol;Acc:HGNC:24472]	-
ENSG00000176974	352.573	325.622	359.694	1019.31	873.395	924.59	345.963	939.098	-1.44146	2e-40	5.91996e-39	SHMT1	17	18327860	18363563	-	7281	protein_coding	serine hydroxymethyltransferase 1 [Source:HGNC Symbol;Acc:HGNC:10850]	-
ENSG00000167880	3056.77	2669.49	2694.97	1378.53	1295.55	1288.93	2807.08	1321	1.0872	2.31926e-40	6.85516e-39	EVPL	17	76004502	76027452	-	7510	protein_coding	envoplakin [Source:HGNC Symbol;Acc:HGNC:3503]	-
ENSG00000255112	1704.1	1785.8	1623.54	765.848	817.108	765.912	1704.48	782.956	1.12272	2.5295e-40	7.46598e-39	CHMP1B	18	11851396	11854449	+	3054	protein_coding	charged multivesicular body protein 1B [Source:HGNC Symbol;Acc:HGNC:24287]	-
ENSG00000125944	1541.38	1485.78	1658.53	3168.24	3031.08	3293.24	1561.9	3164.19	-1.01882	2.54712e-40	7.50733e-39	HNRNPR	1	23303771	23344336	-	8676	protein_coding	heterogeneous nuclear ribonucleoprotein R [Source:HGNC Symbol;Acc:HGNC:5047]	-
ENSG00000099337	2636.39	2630.58	2508.02	1336.59	1231.76	1314.64	2591.66	1294.33	1.00155	2.63574e-40	7.75753e-39	KCNK6	19	38319844	38332076	+	6169	protein_coding	potassium two pore domain channel subfamily K member 6 [Source:HGNC Symbol;Acc:HGNC:6281]	-
ENSG00000153714	271.21	344.054	291.91	44.6745	54.4113	54.9613	302.391	51.349	2.55902	2.69193e-40	7.9117e-39	LURAP1L	9	12775021	12822131	+	2132	protein_coding	leucine rich adaptor protein 1 like [Source:HGNC Symbol;Acc:HGNC:31452]	-
ENSG00000246640	385.345	329.718	379.374	82.9669	62.8544	82.4419	364.812	76.0877	2.25905	3.36182e-40	9.86656e-39	PICART1	17	50050349	50055739	-	2533	lincRNA	p53-inducible cancer-associated RNA transcript 1 [Source:NCBI gene;Acc:284080]	-
ENSG00000163393	933.415	925.668	814.505	293.575	336.787	335.973	891.196	322.112	1.46826	3.55329e-40	1.04138e-38	SLC22A15	1	115976498	116070054	+	5292	protein_coding	solute carrier family 22 member 15 [Source:HGNC Symbol;Acc:HGNC:20301]	-
ENSG00000033170	325.452	268.28	355.321	880.726	923.116	929.909	316.351	911.25	-1.52799	4.4081e-40	1.29008e-38	FUT8	14	65410592	65744121	+	6700	protein_coding	fucosyltransferase 8 [Source:HGNC Symbol;Acc:HGNC:4019]	-
ENSG00000139044	1482.62	1353.69	1332.73	621.796	612.596	601.028	1389.68	611.807	1.18339	5.12515e-40	1.49783e-38	B4GALNT3	12	460364	563509	+	6867	protein_coding	beta-1,4-N-acetyl-galactosaminyltransferase 3 [Source:HGNC Symbol;Acc:HGNC:24137]	-
ENSG00000157379	1870.22	1894.34	1749.27	905.342	843.375	839.489	1837.95	862.735	1.0912	9.38122e-40	2.73014e-38	DHRS1	14	24290598	24299833	-	5002	protein_coding	dehydrogenase/reductase 1 [Source:HGNC Symbol;Acc:HGNC:16445]	-
ENSG00000115844	317.542	308.215	278.79	57.4386	50.6588	62.053	301.516	56.7168	2.4089	9.77628e-40	2.83717e-38	DLX2	2	172099439	172102900	-	2970	protein_coding	distal-less homeobox 2 [Source:HGNC Symbol;Acc:HGNC:2915]	Homeobox
ENSG00000166881	440.717	443.379	439.505	1009.28	1167.97	1181.67	441.2	1119.64	-1.34349	1.06739e-39	3.09334e-38	NEMP1	12	57055643	57088063	-	5708	protein_coding	nuclear envelope integral membrane protein 1 [Source:HGNC Symbol;Acc:HGNC:29001]	-
ENSG00000168268	972.967	943.076	1044.1	2442.51	2072.32	2162.99	986.713	2225.94	-1.17396	1.11482e-39	3.22629e-38	NT5DC2	3	52524385	52535054	-	4719	protein_coding	5'-nucleotidase domain containing 2 [Source:HGNC Symbol;Acc:HGNC:25717]	-
ENSG00000100234	1706.36	1582.03	1735.06	767.672	715.79	796.052	1674.49	759.838	1.1394	1.91994e-39	5.54088e-38	TIMP3	22	32801701	32863043	+	4603	protein_coding	TIMP metallopeptidase inhibitor 3 [Source:HGNC Symbol;Acc:HGNC:11822]	-
ENSG00000123136	687.066	618.478	637.391	1662.07	1482.24	1436.97	647.645	1527.09	-1.23805	1.94833e-39	5.61501e-38	DDX39A	19	14408819	14419383	-	3840	protein_coding	DExD-box helicase 39A [Source:HGNC Symbol;Acc:HGNC:17821]	-
ENSG00000203760	79.103	132.092	72.1575	473.185	501.897	474.262	94.4509	483.115	-2.34847	1.96044e-39	5.64209e-38	CENPW	6	126340174	126348875	+	795	protein_coding	centromere protein W [Source:HGNC Symbol;Acc:HGNC:21488]	-
ENSG00000168411	682.546	654.316	658.164	1399.5	1613.58	1570.83	665.009	1527.97	-1.20036	2.17755e-39	6.25828e-38	RFWD3	16	74621394	74666881	-	6465	protein_coding	ring finger and WD repeat domain 3 [Source:HGNC Symbol;Acc:HGNC:25539]	-
ENSG00000144115	772.949	731.114	772.96	276.252	288.005	292.536	759.008	285.598	1.40978	3.30744e-39	9.49245e-38	THNSL2	2	88170295	88186636	+	6431	protein_coding	threonine synthase like 2 [Source:HGNC Symbol;Acc:HGNC:25602]	-
ENSG00000104808	255.39	237.561	194.607	21.8814	15.9481	31.0265	229.186	22.952	3.31416	3.94371e-39	1.1303e-37	DHDH	19	48933682	48944969	+	1081	protein_coding	dihydrodiol dehydrogenase [Source:HGNC Symbol;Acc:HGNC:17887]	-
ENSG00000100162	20.3408	18.4315	19.6793	238.872	206.388	200.343	19.4838	215.201	-3.46702	4.97934e-39	1.42515e-37	CENPM	22	41938721	41947164	-	1778	protein_coding	centromere protein M [Source:HGNC Symbol;Acc:HGNC:18352]	-
ENSG00000204301	67.8026	37.8869	65.5977	313.633	346.168	351.929	57.0957	337.244	-2.56956	5.34696e-39	1.52616e-37	NOTCH4	6	32194843	32224067	-	9748	protein_coding	notch 4 [Source:HGNC Symbol;Acc:HGNC:7884]	-
ENSG00000132436	190.977	177.147	156.341	538.829	579.762	601.028	174.822	573.206	-1.71369	5.64624e-39	1.60717e-37	FIGNL1	7	50444128	50542535	-	5034	protein_coding	fidgetin like 1 [Source:HGNC Symbol;Acc:HGNC:13286]	-
ENSG00000172890	1539.12	1585.1	1503.28	751.261	689.523	707.405	1542.5	716.063	1.10716	5.80878e-39	1.65117e-37	NADSYN1	11	71453109	71524107	+	16263	protein_coding	NAD synthetase 1 [Source:HGNC Symbol;Acc:HGNC:29832]	-
ENSG00000104783	257.65	272.376	263.484	39.2041	41.2775	51.4154	264.503	43.9657	2.58734	6.37674e-39	1.81014e-37	KCNN4	19	43766533	43781261	-	3408	protein_coding	potassium calcium-activated channel subfamily N member 4 [Source:HGNC Symbol;Acc:HGNC:6293]	-
ENSG00000141480	247.479	232.441	276.604	784.083	690.461	734.885	252.175	736.476	-1.54713	6.49953e-39	1.84248e-37	ARRB2	17	4710489	4721499	+	4372	protein_coding	arrestin beta 2 [Source:HGNC Symbol;Acc:HGNC:712]	-
ENSG00000179388	224.878	179.195	202.26	18.2345	21.5769	18.6159	202.111	19.4758	3.37577	9.58907e-39	2.70722e-37	EGR3	8	22687659	22693302	-	4855	protein_coding	early growth response 3 [Source:HGNC Symbol;Acc:HGNC:3240]	zf-C2H2
ENSG00000138376	65.5425	54.2704	95.1167	344.632	408.085	422.847	71.6432	391.855	-2.45444	1.17865e-38	3.32309e-37	BARD1	2	214725646	214809711	-	6067	protein_coding	BRCA1 associated RING domain 1 [Source:HGNC Symbol;Acc:HGNC:952]	-
ENSG00000175793	80812.7	79680.2	72500.8	41563.7	33516.4	34895.1	77664.6	36658.4	1.08311	1.57344e-38	4.42417e-37	SFN	1	26863138	26864457	+	1320	protein_coding	stratifin [Source:HGNC Symbol;Acc:HGNC:10773]	-
ENSG00000189223	1455.49	1400.79	1472.67	561.622	652.936	661.308	1442.98	625.289	1.20629	1.82054e-38	5.11202e-37	PAX8-AS1	2	113211522	113276581	+	17274	processed_transcript	PAX8 antisense RNA 1 [Source:HGNC Symbol;Acc:HGNC:49271]	-
ENSG00000172296	491.569	507.889	506.196	99.378	147.286	143.608	501.884	130.091	1.9481	3.76307e-38	1.05381e-36	SPTLC3	20	13008979	13169103	+	8520	protein_coding	serine palmitoyltransferase long chain base subunit 3 [Source:HGNC Symbol;Acc:HGNC:16253]	-
ENSG00000000460	56.5021	44.0307	60.1313	315.457	272.056	355.475	53.5547	314.329	-2.55728	3.93946e-38	1.10172e-36	C1orf112	1	169662007	169854080	+	5967	protein_coding	chromosome 1 open reading frame 112 [Source:HGNC Symbol;Acc:HGNC:25565]	-
ENSG00000189280	1501.83	1404.89	1297.74	614.502	515.031	472.49	1401.48	534.008	1.39212	4.53769e-38	1.26732e-36	GJB5	1	34755047	34758512	+	1355	protein_coding	gap junction protein beta 5 [Source:HGNC Symbol;Acc:HGNC:4287]	-
ENSG00000125398	1489.4	1365.98	1399.42	648.236	662.317	654.216	1418.26	654.923	1.11448	5.23721e-38	1.46072e-36	SOX9	17	72121020	72126420	+	3935	protein_coding	SRY-box 9 [Source:HGNC Symbol;Acc:HGNC:11204]	HMG
ENSG00000113369	646.384	660.46	665.817	150.435	231.717	177.294	657.554	186.482	1.81935	5.50833e-38	1.53428e-36	ARRDC3	5	91368724	91383359	-	4934	protein_coding	arrestin domain containing 3 [Source:HGNC Symbol;Acc:HGNC:29263]	-
ENSG00000130513	522.08	588.782	454.811	142.229	155.729	132.971	521.891	143.643	1.8627	5.68642e-38	1.58177e-36	GDF15	19	18374731	18389176	+	2087	protein_coding	growth differentiation factor 15 [Source:HGNC Symbol;Acc:HGNC:30142]	-
ENSG00000175662	1793.38	1680.33	1683.68	844.257	827.427	830.624	1719.13	834.103	1.04317	5.81821e-38	1.61626e-36	TOM1L2	17	17843511	17972422	-	7863	protein_coding	target of myb1 like 2 membrane trafficking protein [Source:HGNC Symbol;Acc:HGNC:11984]	-
ENSG00000112659	2378.74	2011.08	2233.6	976.457	1017.87	1057.56	2207.81	1017.29	1.11742	7.39574e-38	2.05175e-36	CUL9	6	43182175	43224587	+	12251	protein_coding	cullin 9 [Source:HGNC Symbol;Acc:HGNC:15982]	-
ENSG00000153294	353.703	335.862	364.068	87.5255	75.9882	87.7607	351.211	83.7582	2.0668	8.83474e-38	2.44769e-36	ADGRF4	6	47685864	47722021	+	3391	protein_coding	adhesion G protein-coupled receptor F4 [Source:HGNC Symbol;Acc:HGNC:19011]	-
ENSG00000109101	196.627	156.667	206.633	2.73517	6.56688	11.5241	186.643	6.94206	4.73993	9.81782e-38	2.71644e-36	FOXN1	17	28506243	28538896	+	3637	protein_coding	forkhead box N1 [Source:HGNC Symbol;Acc:HGNC:12765]	Fork
ENSG00000183856	67.8026	51.1985	116.983	1368.5	1478.49	1450.27	78.6612	1432.42	-4.18807	1.16113e-37	3.20414e-36	IQGAP3	1	156525405	156572604	-	6742	protein_coding	IQ motif containing GTPase activating protein 3 [Source:HGNC Symbol;Acc:HGNC:20669]	-
ENSG00000142230	1115.35	1149.92	1168.73	2632.15	2254.32	2358.02	1144.67	2414.83	-1.07694	1.18709e-37	3.27142e-36	SAE1	19	47113274	47210636	+	3396	protein_coding	SUMO1 activating enzyme subunit 1 [Source:HGNC Symbol;Acc:HGNC:30660]	-
ENSG00000204516	198.887	168.955	250.365	687.44	759.882	662.195	206.069	703.172	-1.77223	1.68266e-37	4.631e-36	MICB	6	31494881	31511124	+	2798	protein_coding	MHC class I polypeptide-related sequence B [Source:HGNC Symbol;Acc:HGNC:7091]	-
ENSG00000125319	65.5425	66.558	64.5045	303.604	308.643	326.222	65.535	312.823	-2.25487	1.8116e-37	4.97926e-36	C17orf53	17	44141906	44162476	+	3005	protein_coding	chromosome 17 open reading frame 53 [Source:HGNC Symbol;Acc:HGNC:28460]	-
ENSG00000134363	4543.9	4604.79	4027.7	2305.75	2088.27	2024.7	4392.13	2139.57	1.03768	1.82576e-37	5.01155e-36	FST	5	53480409	53487134	+	2969	protein_coding	follistatin [Source:HGNC Symbol;Acc:HGNC:3971]	-
ENSG00000120594	241.829	211.962	226.312	33.7338	26.2675	34.5724	226.701	31.5246	2.84344	1.96689e-37	5.39182e-36	PLXDC2	10	19816239	20289856	+	12567	protein_coding	plexin domain containing 2 [Source:HGNC Symbol;Acc:HGNC:21013]	-
ENSG00000136731	1561.72	1315.8	1681.49	3233.89	3545.18	3458.13	1519.67	3412.4	-1.16754	1.98003e-37	5.42069e-36	UGGT1	2	128091200	128195677	+	11349	protein_coding	UDP-glucose glycoprotein glucosyltransferase 1 [Source:HGNC Symbol;Acc:HGNC:15663]	-
ENSG00000175264	308.502	305.143	307.216	67.4676	70.3594	64.7124	306.954	67.5132	2.18531	2.43045e-37	6.64504e-36	CHST1	11	45648877	45665622	-	3478	protein_coding	carbohydrate sulfotransferase 1 [Source:HGNC Symbol;Acc:HGNC:1969]	-
ENSG00000163141	262.17	237.561	259.111	36.469	46.9063	24.8212	252.947	36.0655	2.81436	2.7017e-37	7.37694e-36	BNIPL	1	151036321	151047720	+	3809	protein_coding	BCL2 interacting protein like [Source:HGNC Symbol;Acc:HGNC:16976]	-
ENSG00000167766	1110.83	1240.03	1177.48	521.506	522.536	507.948	1176.11	517.33	1.18538	3.63793e-37	9.92027e-36	ZNF83	19	52594060	52690496	-	8028	protein_coding	zinc finger protein 83 [Source:HGNC Symbol;Acc:HGNC:13158]	zf-C2H2
ENSG00000166592	545.811	500.721	408.893	134.023	126.647	104.604	485.141	121.758	1.99514	3.69261e-37	1.00562e-35	RRAD	16	66921679	66925644	-	1709	protein_coding	RRAD, Ras related glycolysis inhibitor and calcium channel regulator [Source:HGNC Symbol;Acc:HGNC:10446]	-
ENSG00000166750	2727.92	2704.3	2700.44	1222.62	1434.39	1355.42	2710.89	1337.48	1.01935	3.83601e-37	1.04331e-35	SLFN5	17	35243036	35273655	+	10709	protein_coding	schlafen family member 5 [Source:HGNC Symbol;Acc:HGNC:28286]	-
ENSG00000119403	363.874	273.4	338.922	991.044	871.519	913.953	325.398	925.505	-1.51013	4.45417e-37	1.20985e-35	PHF19	9	120855652	120894896	-	6733	protein_coding	PHD finger protein 19 [Source:HGNC Symbol;Acc:HGNC:24566]	-
ENSG00000091986	1305.2	1241.05	1320.7	547.946	531.917	613.439	1288.98	564.434	1.19069	4.9992e-37	1.35612e-35	CCDC80	3	112596794	112649530	-	13071	protein_coding	coiled-coil domain containing 80 [Source:HGNC Symbol;Acc:HGNC:30649]	-
ENSG00000133112	26379.7	33343.5	25320.7	12063	12645	13099.4	28348	12602.5	1.16957	5.9198e-37	1.60375e-35	TPT1	13	45333471	45341370	-	7269	protein_coding	tumor protein, translationally-controlled 1 [Source:HGNC Symbol;Acc:HGNC:12022]	-
ENSG00000184992	332.233	287.735	268.951	793.2	864.014	785.414	296.306	814.209	-1.4591	6.09022e-37	1.64563e-35	BRI3BP	12	124993700	125031231	+	6648	protein_coding	BRI3 binding protein [Source:HGNC Symbol;Acc:HGNC:14251]	-
ENSG00000204618	758.259	711.659	704.083	289.017	250.48	265.942	724.667	268.479	1.432	6.90283e-37	1.86212e-35	RNF39	6	30070266	30075887	-	2206	protein_coding	ring finger protein 39 [Source:HGNC Symbol;Acc:HGNC:18064]	-
ENSG00000068137	1095.01	1047.52	1038.63	480.479	400.58	405.118	1060.39	428.725	1.30629	6.90935e-37	1.86212e-35	PLEKHH3	17	42667914	42676994	-	4803	protein_coding	pleckstrin homology, MyTH4 and FERM domain containing H3 [Source:HGNC Symbol;Acc:HGNC:26105]	-
ENSG00000197182	685.936	623.597	678.937	252.548	215.769	230.483	662.823	232.933	1.50797	6.93153e-37	1.86568e-35	MIRLET7BHG	22	46053869	46113928	+	5728	lincRNA	MIRLET7B host gene [Source:HGNC Symbol;Acc:HGNC:37189]	-
ENSG00000144959	297.201	249.849	294.097	730.291	795.531	777.436	280.382	767.753	-1.45476	7.77868e-37	2.09099e-35	NCEH1	3	172630249	172711218	-	4808	protein_coding	neutral cholesterol ester hydrolase 1 [Source:HGNC Symbol;Acc:HGNC:29260]	-
ENSG00000186350	2887.26	2543.54	2883.02	1378.53	1294.61	1398.85	2771.27	1357.33	1.02936	7.98052e-37	2.13971e-35	RXRA	9	134317098	134440585	+	11083	protein_coding	retinoid X receptor alpha [Source:HGNC Symbol;Acc:HGNC:10477]	RXR-like
ENSG00000070081	437.326	508.913	483.237	1078.57	1143.58	1163.94	476.492	1128.69	-1.24315	1.18329e-36	3.1685e-35	NUCB2	11	17208153	17349980	+	9025	protein_coding	nucleobindin 2 [Source:HGNC Symbol;Acc:HGNC:8044]	-
ENSG00000126803	374.044	353.269	390.307	1110.48	879.962	1022.1	372.54	1004.18	-1.43124	1.24678e-36	3.33422e-35	HSPA2	14	64535905	64546173	+	5777	protein_coding	heat shock protein family A (Hsp70) member 2 [Source:HGNC Symbol;Acc:HGNC:5235]	-
ENSG00000163071	466.708	510.961	449.345	116.701	123.833	154.246	475.671	131.593	1.85311	1.38103e-36	3.68376e-35	SPATA18	4	52051331	52097292	+	4941	protein_coding	spermatogenesis associated 18 [Source:HGNC Symbol;Acc:HGNC:29579]	-
ENSG00000025770	374.044	354.293	352.041	1052.13	889.343	889.131	360.126	943.535	-1.38992	1.44354e-36	3.84556e-35	NCAPH2	22	50508216	50523472	+	3159	protein_coding	non-SMC condensin II complex subunit H2 [Source:HGNC Symbol;Acc:HGNC:25071]	-
ENSG00000149212	1404.64	1379.29	1534.99	632.737	690.461	631.168	1439.64	651.455	1.14413	1.51911e-36	4.04168e-35	SESN3	11	95165513	95232541	-	10573	protein_coding	sestrin 3 [Source:HGNC Symbol;Acc:HGNC:23060]	-
ENSG00000123143	424.896	504.817	429.665	1135.1	1106.99	1063.77	453.126	1101.95	-1.28069	1.85298e-36	4.92365e-35	PKN1	19	14433053	14471867	+	4606	protein_coding	protein kinase N1 [Source:HGNC Symbol;Acc:HGNC:9405]	-
ENSG00000108468	1217.06	1107.93	1166.55	2406.95	2212.1	2392.59	1163.85	2337.21	-1.00641	2.01882e-36	5.35749e-35	CBX1	17	48070052	48101521	-	3087	protein_coding	chromobox 1 [Source:HGNC Symbol;Acc:HGNC:1551]	-
ENSG00000101868	181.937	149.5	197.887	552.505	560.999	625.849	176.441	579.784	-1.71861	2.23494e-36	5.92345e-35	POLA1	X	24693919	24996986	+	6336	protein_coding	DNA polymerase alpha 1, catalytic subunit [Source:HGNC Symbol;Acc:HGNC:9173]	-
ENSG00000077514	245.219	242.681	236.152	669.206	636.049	667.513	241.351	657.589	-1.4462	2.24521e-36	5.94307e-35	POLD3	11	74493851	74669117	+	5508	protein_coding	DNA polymerase delta 3, accessory subunit [Source:HGNC Symbol;Acc:HGNC:20932]	-
ENSG00000114423	668.985	645.101	651.604	229.755	239.222	255.304	655.23	241.427	1.43993	2.57089e-36	6.78786e-35	CBLB	3	105655461	105869552	-	12269	protein_coding	Cbl proto-oncogene B [Source:HGNC Symbol;Acc:HGNC:1542]	-
ENSG00000049759	994.437	920.549	1196.07	2297.55	2438.19	2451.98	1037.02	2395.91	-1.20856	2.63063e-36	6.93679e-35	NEDD4L	18	58044367	58401540	+	17455	protein_coding	neural precursor cell expressed, developmentally down-regulated 4-like, E3 ubiquitin protein ligase [Source:HGNC Symbol;Acc:HGNC:7728]	-
ENSG00000095739	502.869	772.073	552.114	152.258	136.028	156.906	609.019	148.397	2.03764	2.81588e-36	7.41587e-35	BAMBI	10	28677342	28682939	+	2314	protein_coding	BMP and activin membrane bound inhibitor [Source:HGNC Symbol;Acc:HGNC:30251]	-
ENSG00000168824	666.725	730.09	716.109	251.636	220.46	275.693	704.308	249.263	1.4979	5.37903e-36	1.41125e-34	NSG1	4	4348140	4419058	+	4355	protein_coding	neuronal vesicle trafficking associated 1 [Source:HGNC Symbol;Acc:HGNC:18790]	-
ENSG00000144583	350.313	372.725	389.213	947.282	879.024	891.791	370.75	906.032	-1.28879	5.39748e-36	1.4143e-34	2024-03-04	2	216257865	216372027	-	4447	protein_coding	membrane associated ring-CH-type finger 4 [Source:HGNC Symbol;Acc:HGNC:29269]	-
ENSG00000128944	253.13	224.249	260.204	743.055	679.203	656.876	245.861	693.045	-1.49624	5.50764e-36	1.44135e-34	KNSTRN	15	40382721	40394246	+	3654	protein_coding	kinetochore localized astrin (SPAG5) binding protein [Source:HGNC Symbol;Acc:HGNC:30767]	-
ENSG00000165916	1116.48	988.131	1011.3	2488.1	2085.45	2257.84	1038.64	2277.13	-1.13306	6.72582e-36	1.75794e-34	PSMC3	11	47418769	47426473	-	2276	protein_coding	proteasome 26S subunit, ATPase 3 [Source:HGNC Symbol;Acc:HGNC:9549]	-
ENSG00000126457	2136.91	2173.89	2416.18	5315.35	4321.01	4724.01	2242.33	4786.79	-1.09412	7.52321e-36	1.96388e-34	PRMT1	19	49675786	49689029	+	4796	protein_coding	protein arginine methyltransferase 1 [Source:HGNC Symbol;Acc:HGNC:5187]	-
ENSG00000146278	1061.11	1100.77	1011.3	463.156	474.692	463.625	1057.73	467.157	1.17928	8.57566e-36	2.23581e-34	PNRC1	6	89080751	89085160	+	2992	protein_coding	proline rich nuclear receptor coactivator 1 [Source:HGNC Symbol;Acc:HGNC:17278]	-
ENSG00000110013	786.51	783.337	764.214	276.252	269.242	328.881	778.02	291.459	1.41567	9.75803e-36	2.54088e-34	SIAE	11	124633113	124695707	-	8139	protein_coding	sialic acid acetylesterase [Source:HGNC Symbol;Acc:HGNC:18187]	-
ENSG00000214826	31.6412	37.8869	40.4519	237.048	248.603	230.483	36.66	238.711	-2.70077	1.10493e-35	2.87351e-34	DDX12P	12	9418673	9448229	-	2947	unprocessed_pseudogene	DEAD/H-box helicase 12, pseudogene [Source:HGNC Symbol;Acc:HGNC:2737]	-
ENSG00000133466	1029.47	989.154	1075.8	439.451	437.167	468.057	1031.48	448.225	1.20194	1.14692e-35	2.97899e-34	C1QTNF6	22	37180167	37199385	-	7143	protein_coding	C1q and TNF related 6 [Source:HGNC Symbol;Acc:HGNC:14343]	-
ENSG00000146477	437.326	425.971	452.624	140.406	105.07	124.993	438.641	123.489	1.82759	2.04414e-35	5.29617e-34	SLC22A3	6	160348268	160452581	+	3348	protein_coding	solute carrier family 22 member 3 [Source:HGNC Symbol;Acc:HGNC:10967]	-
ENSG00000143546	4956.37	8533.76	3917.28	221.549	154.791	238.461	5802.47	204.934	4.82324	2.41733e-35	6.25526e-34	S100A8	1	153390032	153391188	-	1006	protein_coding	S100 calcium binding protein A8 [Source:HGNC Symbol;Acc:HGNC:10498]	-
ENSG00000173156	4591.36	5528.41	4154.52	2185.4	1809.64	1925.42	4758.1	1973.49	1.26976	2.52613e-35	6.52865e-34	RHOD	11	67056818	67072013	+	1265	protein_coding	ras homolog family member D [Source:HGNC Symbol;Acc:HGNC:670]	-
ENSG00000160360	1252.09	1185.76	1263.85	576.21	514.093	574.434	1233.9	554.912	1.1523	2.79744e-35	7.22086e-34	GPSM1	9	136327476	136359605	+	5138	protein_coding	G protein signaling modulator 1 [Source:HGNC Symbol;Acc:HGNC:17858]	-
ENSG00000122483	42.9416	51.1985	53.5715	257.106	326.468	264.169	49.2372	282.581	-2.51853	2.90392e-35	7.48643e-34	CCDC18	1	93179919	93278730	+	5633	protein_coding	coiled-coil domain containing 18 [Source:HGNC Symbol;Acc:HGNC:30370]	-
ENSG00000074527	878.043	955.364	940.234	397.512	394.951	394.48	924.547	395.648	1.22487	3.70776e-35	9.53508e-34	NTN4	12	95657807	95791152	-	4166	protein_coding	netrin 4 [Source:HGNC Symbol;Acc:HGNC:13658]	-
ENSG00000160193	246.349	215.034	232.872	748.526	627.606	645.352	231.418	673.828	-1.54311	4.30576e-35	1.10456e-33	WDR4	21	42843094	42879568	-	2738	protein_coding	WD repeat domain 4 [Source:HGNC Symbol;Acc:HGNC:12756]	-
ENSG00000149554	306.242	266.232	296.283	739.408	813.355	736.658	289.586	763.141	-1.39898	4.9566e-35	1.26995e-33	CHEK1	11	125625136	125676255	+	6558	protein_coding	checkpoint kinase 1 [Source:HGNC Symbol;Acc:HGNC:1925]	-
ENSG00000157514	724.357	917.477	775.147	298.134	286.128	292.536	805.66	292.266	1.46366	5.84654e-35	1.49612e-33	TSC22D3	X	107713221	107777342	-	4766	protein_coding	TSC22 domain family member 3 [Source:HGNC Symbol;Acc:HGNC:3051]	TSC22
ENSG00000135679	3400.3	3699.6	3381.56	1328.38	1742.1	1592.99	3493.82	1554.49	1.16859	5.92135e-35	1.51154e-33	MDM2	12	68808176	68850686	+	13284	protein_coding	MDM2 proto-oncogene [Source:HGNC Symbol;Acc:HGNC:6973]	-
ENSG00000168393	325.452	413.684	353.135	1117.77	933.435	947.638	364.09	999.616	-1.4555	6.00907e-35	1.53206e-33	DTYMK	2	241675742	241686991	-	2451	protein_coding	deoxythymidylate kinase [Source:HGNC Symbol;Acc:HGNC:3061]	-
ENSG00000117632	1568.5	1968.07	1510.93	3791.86	3722.48	3728.5	1682.5	3747.62	-1.15474	6.61336e-35	1.68406e-33	STMN1	1	25884181	25906991	-	6261	protein_coding	stathmin 1 [Source:HGNC Symbol;Acc:HGNC:6510]	-
ENSG00000138092	98.3137	48.1266	91.8368	408.453	404.332	398.026	79.4257	403.604	-2.35218	6.73305e-35	1.71244e-33	CENPO	2	24793136	24822376	+	5518	protein_coding	centromere protein O [Source:HGNC Symbol;Acc:HGNC:28152]	-
ENSG00000145545	785.38	791.528	727.042	309.075	285.19	315.584	767.983	303.283	1.34008	6.95312e-35	1.76624e-33	SRD5A1	5	6633343	6674386	+	7715	protein_coding	steroid 5 alpha-reductase 1 [Source:HGNC Symbol;Acc:HGNC:11284]	-
ENSG00000181333	5255.83	4559.74	5352.78	2226.43	2554.52	2557.47	5056.11	2446.14	1.04737	7.26035e-35	1.84204e-33	HEPHL1	11	94021361	94113751	+	5345	protein_coding	hephaestin like 1 [Source:HGNC Symbol;Acc:HGNC:30477]	-
ENSG00000161981	184.197	189.434	170.554	633.648	562.876	514.154	181.395	570.226	-1.65178	8.61497e-35	2.18305e-33	SNRNP25	16	53010	57669	+	3060	protein_coding	small nuclear ribonucleoprotein U11/U12 subunit 25 [Source:HGNC Symbol;Acc:HGNC:14161]	-
ENSG00000135636	1031.73	924.644	1134.84	385.659	421.219	426.393	1030.4	411.09	1.32521	9.40092e-35	2.37931e-33	DYSF	2	71453722	71686768	+	8386	protein_coding	dysferlin [Source:HGNC Symbol;Acc:HGNC:3097]	-
ENSG00000109670	1043.03	1148.89	1052.84	463.156	493.454	482.241	1081.59	479.617	1.17369	1.47785e-34	3.73125e-33	FBXW7	4	152320544	152536063	-	11095	protein_coding	F-box and WD repeat domain containing 7 [Source:HGNC Symbol;Acc:HGNC:16712]	-
ENSG00000115457	2883.87	3226.53	2576.9	1394.94	1171.72	1145.32	2895.76	1237.33	1.22693	1.55794e-34	3.92868e-33	IGFBP2	2	216632828	216664436	+	4767	protein_coding	insulin like growth factor binding protein 2 [Source:HGNC Symbol;Acc:HGNC:5471]	-
ENSG00000198719	484.788	409.588	519.316	1218.06	1132.32	1113.41	471.231	1154.6	-1.29405	1.68151e-34	4.23515e-33	DLL1	6	170282206	170306565	-	3226	protein_coding	delta like canonical Notch ligand 1 [Source:HGNC Symbol;Acc:HGNC:2908]	-
ENSG00000145349	1318.76	1199.07	1259.48	505.095	587.267	577.093	1259.1	556.485	1.17773	1.98821e-34	4.99553e-33	CAMK2D	4	113451032	113761927	-	7363	protein_coding	calcium/calmodulin dependent protein kinase II delta [Source:HGNC Symbol;Acc:HGNC:1462]	-
ENSG00000144749	238.439	165.883	244.898	658.265	728.924	708.291	216.407	698.493	-1.69331	2.25774e-34	5.66589e-33	LRIG1	3	66378797	66501263	-	7032	protein_coding	leucine rich repeats and immunoglobulin like domains 1 [Source:HGNC Symbol;Acc:HGNC:17360]	-
ENSG00000172893	2174.2	1878.98	2340.75	4441.92	4214.06	4399.56	2131.31	4351.85	-1.0303	2.62492e-34	6.57941e-33	DHCR7	11	71428193	71452868	-	4160	protein_coding	7-dehydrocholesterol reductase [Source:HGNC Symbol;Acc:HGNC:2860]	-
ENSG00000092330	1317.63	1399.77	1263.85	599.003	645.431	613.439	1327.08	619.291	1.10001	2.86648e-34	7.17622e-33	TINF2	14	24239643	24242674	-	2712	protein_coding	TERF1 interacting nuclear factor 2 [Source:HGNC Symbol;Acc:HGNC:11824]	-
ENSG00000249115	201.148	164.859	251.458	674.676	649.183	663.967	205.822	662.609	-1.68876	3.23381e-34	8.08609e-33	HAUS5	19	35612744	35625349	+	5075	protein_coding	HAUS augmin like complex subunit 5 [Source:HGNC Symbol;Acc:HGNC:29130]	-
ENSG00000165655	927.765	676.844	771.867	278.076	261.737	259.736	792.159	266.516	1.57068	3.27203e-34	8.17182e-33	ZNF503	10	75397830	75401906	-	3347	protein_coding	zinc finger protein 503 [Source:HGNC Symbol;Acc:HGNC:23589]	-
ENSG00000188483	484.788	609.262	472.304	165.934	117.266	119.674	522.118	134.291	1.95973	3.44032e-34	8.58181e-33	IER5L	9	129175552	129178262	-	2711	protein_coding	immediate early response 5 like [Source:HGNC Symbol;Acc:HGNC:23679]	-
ENSG00000119862	1175.24	1181.66	1080.18	498.713	518.784	538.088	1145.69	518.528	1.14368	3.73667e-34	9.30986e-33	LGALSL	2	64453969	64461381	+	4003	protein_coding	galectin like [Source:HGNC Symbol;Acc:HGNC:25012]	-
ENSG00000077157	646.384	596.974	633.018	201.491	225.15	244.666	625.459	223.769	1.48215	4.51785e-34	1.12292e-32	PPP1R12B	1	202348699	202592706	+	21069	protein_coding	protein phosphatase 1 regulatory subunit 12B [Source:HGNC Symbol;Acc:HGNC:7619]	-
ENSG00000165949	11173.9	11599.5	9517.14	5681.87	5014.28	4889.78	10763.5	5195.31	1.05091	4.6033e-34	1.1428e-32	IFI27	14	94104836	94116698	+	4147	protein_coding	interferon alpha inducible protein 27 [Source:HGNC Symbol;Acc:HGNC:5397]	-
ENSG00000150630	585.362	498.673	655.977	1553.58	1334.95	1422.79	580.004	1437.11	-1.31003	7.74419e-34	1.91796e-32	VEGFC	4	176683538	176792727	-	2420	protein_coding	vascular endothelial growth factor C [Source:HGNC Symbol;Acc:HGNC:12682]	-
ENSG00000167797	393.255	357.365	484.33	1229.92	1038.51	1085.04	411.65	1117.82	-1.44205	8.61407e-34	2.13085e-32	CDK2AP2	11	67506497	67508649	-	2019	protein_coding	cyclin dependent kinase 2 associated protein 2 [Source:HGNC Symbol;Acc:HGNC:30833]	-
ENSG00000175471	244.089	217.082	181.487	30.0869	27.2056	32.7995	214.219	30.0307	2.83276	9.19485e-34	2.27182e-32	MCTP1	5	94703741	95284575	-	12089	protein_coding	multiple C2 and transmembrane domain containing 1 [Source:HGNC Symbol;Acc:HGNC:26183]	-
ENSG00000083223	1563.98	1565.65	1549.2	703.851	777.706	796.052	1559.61	759.203	1.03857	9.56994e-34	2.36168e-32	TUT7	9	86287733	86354454	-	6707	protein_coding	terminal uridylyl transferase 7 [Source:HGNC Symbol;Acc:HGNC:25817]	-
ENSG00000163739	27.121	24.5753	27.3324	205.138	194.192	207.434	26.3429	202.255	-2.94261	9.86333e-34	2.42995e-32	CXCL1	4	73869393	73871242	+	1296	protein_coding	C-X-C motif chemokine ligand 1 [Source:HGNC Symbol;Acc:HGNC:4602]	-
ENSG00000005059	120.915	101.373	95.1167	414.835	380.879	378.523	105.801	391.412	-1.88903	1.0204e-33	2.50921e-32	MCUB	4	109560205	109688726	+	3566	protein_coding	mitochondrial calcium uniporter dominant negative beta subunit [Source:HGNC Symbol;Acc:HGNC:26076]	-
ENSG00000167617	2480.44	3036.07	2089.29	1049.39	892.158	905.088	2535.27	948.88	1.41811	1.13685e-33	2.79228e-32	CDC42EP5	19	54465026	54473264	-	903	protein_coding	CDC42 effector protein 5 [Source:HGNC Symbol;Acc:HGNC:17408]	-
ENSG00000188064	1982.09	1609.68	1917.64	3716.19	3856.64	3658.47	1836.47	3743.76	-1.02808	1.33185e-33	3.26736e-32	WNT7B	22	45920362	45977129	-	5051	protein_coding	Wnt family member 7B [Source:HGNC Symbol;Acc:HGNC:12787]	-
ENSG00000141404	185.327	203.77	215.379	30.9986	27.2056	29.2536	201.492	29.1526	2.78879	1.52985e-33	3.74867e-32	GNAL	18	11688956	11885685	+	8445	protein_coding	G protein subunit alpha L [Source:HGNC Symbol;Acc:HGNC:4388]	-
ENSG00000159055	184.197	197.626	178.207	520.595	582.576	536.315	186.677	546.495	-1.54862	1.53594e-33	3.75916e-32	MIS18A	21	32268219	32279069	-	1723	protein_coding	MIS18 kinetochore protein A [Source:HGNC Symbol;Acc:HGNC:1286]	-
ENSG00000130303	1135.69	1511.38	943.514	397.512	343.354	350.156	1196.86	363.674	1.71908	1.5915e-33	3.89056e-32	BST2	19	17402939	17405648	-	1119	protein_coding	bone marrow stromal cell antigen 2 [Source:HGNC Symbol;Acc:HGNC:1119]	-
ENSG00000244617	207.928	127.996	167.274	6.38207	4.69063	8.86472	167.733	6.64581	4.64907	1.60712e-33	3.92413e-32	ASPRV1	2	69960089	69962265	-	2177	protein_coding	aspartic peptidase retroviral like 1 [Source:HGNC Symbol;Acc:HGNC:26321]	-
ENSG00000188643	13636.2	15584.8	12771.9	7491.64	6414.9	6659.18	13997.6	6855.24	1.02995	1.61161e-33	3.93047e-32	S100A16	1	153606886	153613145	-	1701	protein_coding	S100 calcium binding protein A16 [Source:HGNC Symbol;Acc:HGNC:20441]	-
ENSG00000172936	1686.02	1533.91	1624.64	818.728	773.954	804.916	1614.86	799.2	1.01435	1.85173e-33	4.5108e-32	MYD88	3	38138478	38143022	+	3989	protein_coding	MYD88, innate immune signal transduction adaptor [Source:HGNC Symbol;Acc:HGNC:7562]	-
ENSG00000141582	1114.22	1218.52	1027.7	499.625	490.64	460.079	1120.15	483.448	1.21286	2.00771e-33	4.87932e-32	CBX4	17	79833156	79839429	-	2880	protein_coding	chromobox 4 [Source:HGNC Symbol;Acc:HGNC:1554]	-
ENSG00000075275	5121.35	4579.19	5234.7	2219.14	2576.09	2610.66	4978.41	2468.63	1.01184	2.07094e-33	5.02712e-32	CELSR1	22	46360834	46537170	-	12806	protein_coding	cadherin EGF LAG seven-pass G-type receptor 1 [Source:HGNC Symbol;Acc:HGNC:1850]	-
ENSG00000187017	431.676	393.204	420.919	137.67	108.823	101.944	415.266	116.146	1.838	3.87973e-33	9.40686e-32	ESPN	1	6424776	6461367	+	6952	protein_coding	espin [Source:HGNC Symbol;Acc:HGNC:13281]	-
ENSG00000182463	162.726	167.931	171.647	11.8524	20.6388	15.9565	167.435	16.1492	3.3769	4.29295e-33	1.03845e-31	TSHZ2	20	52972407	53495330	+	12581	protein_coding	teashirt zinc finger homeobox 2 [Source:HGNC Symbol;Acc:HGNC:13010]	Others
ENSG00000104219	186.457	134.14	143.222	491.419	521.598	512.381	154.606	508.466	-1.72051	4.44779e-33	1.07466e-31	ZDHHC2	8	17156029	17224799	+	6735	protein_coding	zinc finger DHHC-type containing 2 [Source:HGNC Symbol;Acc:HGNC:18469]	-
ENSG00000108559	326.582	331.766	381.56	839.698	827.427	924.59	346.636	863.905	-1.31779	4.77336e-33	1.14931e-31	NUP88	17	5360963	5420160	-	5294	protein_coding	nucleoporin 88 [Source:HGNC Symbol;Acc:HGNC:8067]	-
ENSG00000145284	1283.73	1167.33	1102.04	487.773	511.279	554.045	1184.37	517.699	1.19343	4.92127e-33	1.18355e-31	SCD5	4	82629539	82798857	-	4292	protein_coding	stearoyl-CoA desaturase 5 [Source:HGNC Symbol;Acc:HGNC:21088]	-
ENSG00000172167	44.0717	57.3423	38.2654	243.43	278.623	257.077	46.5598	259.71	-2.47491	5.05754e-33	1.21492e-31	MTBP	8	120445400	120542133	+	8326	protein_coding	MDM2 binding protein [Source:HGNC Symbol;Acc:HGNC:7417]	-
ENSG00000213853	610.223	571.375	601.313	1248.15	1247.71	1219.79	594.304	1238.55	-1.05981	5.95225e-33	1.4282e-31	EMP2	16	10528422	10580698	-	8718	protein_coding	epithelial membrane protein 2 [Source:HGNC Symbol;Acc:HGNC:3334]	-
ENSG00000138829	1800.16	1598.42	1841.11	3230.24	3752.5	3780.8	1746.56	3587.85	-1.03895	7.3698e-33	1.76629e-31	FBN2	5	128257909	128659185	-	13196	protein_coding	fibrillin 2 [Source:HGNC Symbol;Acc:HGNC:3604]	-
ENSG00000108797	248.609	174.075	258.018	663.735	745.81	726.907	226.901	712.151	-1.65279	7.46655e-33	1.78741e-31	CNTNAP1	17	42682613	42699814	+	6045	protein_coding	contactin associated protein 1 [Source:HGNC Symbol;Acc:HGNC:8011]	-
ENSG00000121211	12.4305	17.4075	8.74637	168.669	173.553	171.089	12.8614	171.104	-3.72473	7.50263e-33	1.79398e-31	MND1	4	153344649	153415118	+	1511	protein_coding	meiotic nuclear divisions 1 [Source:HGNC Symbol;Acc:HGNC:24839]	-
ENSG00000129810	11.3004	3.07191	16.3994	167.757	204.511	166.657	10.2573	179.642	-4.14863	8.08077e-33	1.93e-31	SGO1	3	20160593	20186292	-	3828	protein_coding	shugoshin 1 [Source:HGNC Symbol;Acc:HGNC:25088]	-
ENSG00000128512	376.304	339.958	427.479	919.018	952.198	921.044	381.247	930.753	-1.28858	8.50956e-33	2.02775e-31	DOCK4	7	111726110	112206411	-	11499	protein_coding	dedicator of cytokinesis 4 [Source:HGNC Symbol;Acc:HGNC:19192]	-
ENSG00000171208	380.824	374.773	428.572	899.872	921.24	933.455	394.723	918.189	-1.21831	9.89001e-33	2.35131e-31	NETO2	16	47077703	47143997	-	7481	protein_coding	neuropilin and tolloid like 2 [Source:HGNC Symbol;Acc:HGNC:14644]	-
ENSG00000079435	148.036	124.924	142.128	464.979	428.724	439.69	138.363	444.464	-1.68555	1.33204e-32	3.16325e-31	LIPE	19	42401507	42427426	-	5206	protein_coding	lipase E, hormone sensitive type [Source:HGNC Symbol;Acc:HGNC:6621]	-
ENSG00000006634	177.417	151.547	168.368	510.566	471.877	513.267	165.777	498.57	-1.59038	1.50728e-32	3.57532e-31	DBF4	7	87876216	87909541	+	4583	protein_coding	DBF4 zinc finger [Source:HGNC Symbol;Acc:HGNC:17364]	-
ENSG00000079616	542.42	479.218	601.313	1489.76	1245.83	1257.9	540.984	1331.16	-1.29982	1.58751e-32	3.76132e-31	KIF22	16	29790719	29805385	+	4312	protein_coding	kinesin family member 22 [Source:HGNC Symbol;Acc:HGNC:6391]	-
ENSG00000090013	1280.34	1439.7	1244.17	609.032	543.175	619.644	1321.4	590.617	1.16181	1.82344e-32	4.31541e-31	BLVRB	19	40447765	40465840	-	1689	protein_coding	biliverdin reductase B [Source:HGNC Symbol;Acc:HGNC:1063]	-
ENSG00000158109	1563.98	1447.89	1504.38	692.911	663.255	776.549	1505.42	710.905	1.08176	1.98684e-32	4.69676e-31	TPRG1L	1	3625002	3630127	+	2414	protein_coding	tumor protein p63 regulated 1 like [Source:HGNC Symbol;Acc:HGNC:27007]	-
ENSG00000154065	340.143	369.653	365.161	106.672	98.5032	101.058	358.319	102.078	1.81181	2.12125e-32	5.0088e-31	ANKRD29	18	23598926	23662885	-	6391	protein_coding	ankyrin repeat domain 29 [Source:HGNC Symbol;Acc:HGNC:27110]	-
ENSG00000171703	830.581	776.169	660.351	282.635	266.428	295.195	755.7	281.419	1.42458	2.27093e-32	5.35615e-31	TCEA2	20	64049836	64072347	+	4802	protein_coding	transcription elongation factor A2 [Source:HGNC Symbol;Acc:HGNC:11614]	-
ENSG00000011422	1343.62	1414.1	1260.57	612.679	667.946	619.644	1339.43	633.423	1.08086	2.57064e-32	6.05615e-31	PLAUR	19	43646095	43670547	-	4457	protein_coding	plasminogen activator, urokinase receptor [Source:HGNC Symbol;Acc:HGNC:9053]	-
ENSG00000137628	3299.72	2696.11	2897.23	1271.86	1505.69	1246.38	2964.36	1341.31	1.14408	3.7204e-32	8.73517e-31	DDX60	4	168216293	168318807	-	6750	protein_coding	DExD/H-box helicase 60 [Source:HGNC Symbol;Acc:HGNC:25942]	-
ENSG00000137747	196.627	129.02	150.875	10.029	11.2575	8.86472	158.841	10.0504	3.98298	3.9208e-32	9.1953e-31	TMPRSS13	11	117900643	117929459	-	5367	protein_coding	transmembrane serine protease 13 [Source:HGNC Symbol;Acc:HGNC:29808]	-
ENSG00000183018	447.497	280.568	367.347	84.7904	72.2357	59.3936	365.137	72.1399	2.33912	4.21689e-32	9.86744e-31	SPNS2	17	4498838	4539035	+	4111	protein_coding	sphingolipid transporter 2 [Source:HGNC Symbol;Acc:HGNC:26992]	-
ENSG00000065534	494.959	412.66	459.184	111.23	155.729	117.901	455.601	128.287	1.82917	4.99415e-32	1.1673e-30	MYLK	3	123610049	123884331	-	22167	protein_coding	myosin light chain kinase [Source:HGNC Symbol;Acc:HGNC:7590]	-
ENSG00000125968	293.811	257.016	209.913	41.0276	20.6388	45.2101	253.58	35.6255	2.82658	6.56697e-32	1.53148e-30	ID1	20	31605283	31606515	+	1233	protein_coding	inhibitor of DNA binding 1, HLH protein [Source:HGNC Symbol;Acc:HGNC:5360]	bHLH
ENSG00000225138	574.062	528.368	572.887	205.138	215.769	194.137	558.439	205.015	1.44577	6.83486e-32	1.59217e-30	SLC9A3-AS1	5	473236	480884	+	4302	processed_transcript	SLC9A3 antisense RNA 1 [Source:HGNC Symbol;Acc:HGNC:40550]	-
ENSG00000164430	116.394	92.1573	98.3966	351.014	417.466	370.545	102.316	379.675	-1.89392	8.85318e-32	2.06002e-30	CGAS	6	73413515	73452276	-	4155	protein_coding	cyclic GMP-AMP synthase [Source:HGNC Symbol;Acc:HGNC:21367]	-
ENSG00000110628	711.927	610.286	706.269	276.252	236.408	231.369	676.161	248.01	1.44642	9.09152e-32	2.11312e-30	SLC22A18	11	2899721	2925246	+	5316	protein_coding	solute carrier family 22 member 18 [Source:HGNC Symbol;Acc:HGNC:10964]	-
ENSG00000108846	2277.04	2064.32	2518.95	1073.1	1124.81	1135.57	2286.77	1111.16	1.04097	9.29155e-32	2.1572e-30	ABCC3	17	50634777	50692252	+	9614	protein_coding	ATP binding cassette subfamily C member 3 [Source:HGNC Symbol;Acc:HGNC:54]	-
ENSG00000185668	132.215	149.5	154.155	10.029	10.3194	7.97825	145.29	9.4422	3.94672	9.86273e-32	2.28725e-30	POU3F1	1	38044611	38046794	-	2184	protein_coding	POU class 3 homeobox 1 [Source:HGNC Symbol;Acc:HGNC:9214]	Pou
ENSG00000167702	780.859	831.463	770.774	350.102	336.787	302.287	794.365	329.725	1.26927	1.093e-31	2.5291e-30	KIFC2	8	144466043	144474202	+	4447	protein_coding	kinesin family member C2 [Source:HGNC Symbol;Acc:HGNC:29530]	-
ENSG00000204103	176.287	154.619	172.741	2.73517	1.87625	5.31883	167.882	3.31009	5.65104	1.16737e-31	2.6982e-30	MAFB	20	40685848	40689240	-	3393	protein_coding	MAF bZIP transcription factor B [Source:HGNC Symbol;Acc:HGNC:6408]	TF_bZIP
ENSG00000110002	1351.53	1457.11	1285.72	625.443	621.039	686.129	1364.79	644.204	1.08309	1.50233e-31	3.46854e-30	VWA5A	11	124115362	124147721	+	6403	protein_coding	von Willebrand factor A domain containing 5A [Source:HGNC Symbol;Acc:HGNC:6658]	-
ENSG00000136943	1698.45	1772.49	1431.12	776.789	727.986	727.793	1634.02	744.189	1.13489	2.50924e-31	5.76765e-30	CTSV	9	97029679	97039643	-	4700	protein_coding	cathepsin V [Source:HGNC Symbol;Acc:HGNC:2538]	-
ENSG00000166340	1922.2	1785.8	2177.85	910.813	953.136	957.39	1961.95	940.446	1.06063	2.66289e-31	6.11406e-30	TPP1	11	6612763	6619485	-	6544	protein_coding	tripeptidyl peptidase 1 [Source:HGNC Symbol;Acc:HGNC:2073]	-
ENSG00000086300	172.897	215.034	163.994	512.389	620.101	577.093	183.975	569.861	-1.62871	3.27179e-31	7.50381e-30	SNX10	7	26291895	26374329	+	3518	protein_coding	sorting nexin 10 [Source:HGNC Symbol;Acc:HGNC:14974]	-
ENSG00000164713	1904.12	2148.29	1951.53	1061.25	976.589	916.612	2001.31	984.816	1.02346	4.01649e-31	9.18136e-30	BRI3	7	98252379	98310441	+	5139	protein_coding	brain protein I3 [Source:HGNC Symbol;Acc:HGNC:1109]	-
ENSG00000094916	1361.7	1252.31	1442.06	2535.51	3133.34	3201.94	1352.02	2956.93	-1.12926	4.9419e-31	1.1272e-29	CBX5	12	54230940	54280133	-	15040	protein_coding	chromobox 5 [Source:HGNC Symbol;Acc:HGNC:1555]	-
ENSG00000101347	800.07	597.998	713.922	1581.84	1688.63	1569.06	703.997	1613.17	-1.19747	5.82374e-31	1.32688e-29	SAMHD1	20	36889773	36951901	-	11261	protein_coding	SAM and HD domain containing deoxynucleoside triphosphate triphosphohydrolase 1 [Source:HGNC Symbol;Acc:HGNC:15925]	-
ENSG00000179862	3751.74	3768.21	3671.29	2017.65	1515.07	1559.3	3730.41	1697.34	1.13604	7.08334e-31	1.61034e-29	CITED4	1	40861051	40862366	-	1316	protein_coding	Cbp/p300 interacting transactivator with Glu/Asp rich carboxy-terminal domain 4 [Source:HGNC Symbol;Acc:HGNC:18696]	-
ENSG00000149218	1357.18	1283.03	1306.49	682.882	643.554	626.736	1315.57	651.057	1.01471	7.42826e-31	1.6869e-29	ENDOD1	11	95089810	95132645	+	4687	protein_coding	endonuclease domain containing 1 [Source:HGNC Symbol;Acc:HGNC:29129]	-
ENSG00000183347	161.596	196.602	191.327	20.9697	30.02	23.0483	183.175	24.6793	2.89502	8.43356e-31	1.91311e-29	GBP6	1	89364058	89386461	+	2987	protein_coding	guanylate binding protein family member 6 [Source:HGNC Symbol;Acc:HGNC:25395]	-
ENSG00000074211	218.098	159.739	166.181	22.7931	21.5769	23.0483	181.339	22.4728	3.01059	9.21532e-31	2.0859e-29	PPP2R2C	4	6320578	6563600	-	9198	protein_coding	protein phosphatase 2 regulatory subunit Bgamma [Source:HGNC Symbol;Acc:HGNC:9306]	-
ENSG00000158402	12.4305	24.5753	15.3061	175.963	169.801	174.635	17.4373	173.466	-3.30218	9.80264e-31	2.21642e-29	CDC25C	5	138285265	138338355	-	3338	protein_coding	cell division cycle 25C [Source:HGNC Symbol;Acc:HGNC:1727]	-
ENSG00000164442	696.106	585.711	655.977	261.665	215.769	236.688	645.931	238.041	1.43911	9.97321e-31	2.25254e-29	CITED2	6	139371807	139374620	-	2535	protein_coding	Cbp/p300 interacting transactivator with Glu/Asp rich carboxy-terminal domain 2 [Source:HGNC Symbol;Acc:HGNC:1987]	-
ENSG00000171425	728.877	913.381	861.517	340.073	294.572	336.859	834.592	323.835	1.36604	1.07393e-30	2.42292e-29	ZNF581	19	55635459	55645622	+	1736	protein_coding	zinc finger protein 581 [Source:HGNC Symbol;Acc:HGNC:25017]	zf-C2H2
ENSG00000112149	105.094	116.733	108.236	391.13	382.755	349.27	110.021	374.385	-1.76527	1.16789e-30	2.63205e-29	CD83	6	14117256	14136918	+	2515	protein_coding	CD83 molecule [Source:HGNC Symbol;Acc:HGNC:1703]	-
ENSG00000120457	638.474	605.166	742.348	249.812	257.985	242.007	661.996	249.935	1.40519	1.18986e-30	2.67866e-29	KCNJ5	11	128891356	128921035	+	6109	protein_coding	potassium voltage-gated channel subfamily J member 5 [Source:HGNC Symbol;Acc:HGNC:6266]	-
ENSG00000224259	544.681	586.734	571.794	225.196	210.14	219.845	567.736	218.394	1.37842	1.20217e-30	2.70345e-29	LINC01133	1	159961218	159984750	+	3155	lincRNA	long intergenic non-protein coding RNA 1133 [Source:HGNC Symbol;Acc:HGNC:49447]	-
ENSG00000213390	125.435	121.852	142.128	434.893	413.714	394.48	129.805	414.362	-1.67506	1.39587e-30	3.13566e-29	ARHGAP19	10	97222173	97292673	-	6167	protein_coding	Rho GTPase activating protein 19 [Source:HGNC Symbol;Acc:HGNC:23724]	-
ENSG00000123374	450.887	487.409	508.383	1206.21	1100.42	1007.03	482.226	1104.56	-1.19519	1.55829e-30	3.49672e-29	CDK2	12	55966769	55972784	+	3894	protein_coding	cyclin dependent kinase 2 [Source:HGNC Symbol;Acc:HGNC:1771]	-
ENSG00000186594	795.55	890.853	885.57	390.218	343.354	368.772	857.324	367.448	1.22243	1.66194e-30	3.72528e-29	MIR22HG	17	1711493	1717174	-	2986	lincRNA	MIR22 host gene [Source:HGNC Symbol;Acc:HGNC:28219]	-
ENSG00000166803	24.8609	22.5273	15.3061	163.199	237.346	179.067	20.8981	193.204	-3.20842	2.00218e-30	4.4783e-29	PCLAF	15	64364311	64387687	-	3734	protein_coding	PCNA clamp associated factor [Source:HGNC Symbol;Acc:HGNC:28961]	-
ENSG00000146410	27.121	29.6951	19.6793	195.109	180.12	190.591	25.4985	188.607	-2.88427	2.03893e-30	4.55559e-29	MTFR2	6	136231024	136250335	-	2450	protein_coding	mitochondrial fission regulator 2 [Source:HGNC Symbol;Acc:HGNC:21115]	-
ENSG00000176531	572.932	553.967	466.837	197.844	166.986	171.976	531.245	178.935	1.56981	2.11433e-30	4.71898e-29	PHLDB3	19	43474954	43504935	-	4553	protein_coding	pleckstrin homology like domain family B member 3 [Source:HGNC Symbol;Acc:HGNC:30499]	-
ENSG00000182175	168.376	174.075	159.621	24.6166	18.7625	10.6377	167.357	18.0056	3.22056	2.51321e-30	5.60321e-29	RGMA	15	93035273	93089204	-	13221	protein_coding	repulsive guidance molecule BMP co-receptor a [Source:HGNC Symbol;Acc:HGNC:30308]	-
ENSG00000089356	235.049	221.177	214.286	47.4097	32.8344	45.2101	223.504	41.818	2.4157	2.80779e-30	6.25327e-29	FXYD3	19	35115879	35124324	+	3334	protein_coding	FXYD domain containing ion transport regulator 3 [Source:HGNC Symbol;Acc:HGNC:4027]	-
ENSG00000105855	523.21	545.776	559.767	170.492	220.46	178.181	542.918	189.711	1.5181	2.85672e-30	6.35543e-29	ITGB8	7	20330702	20415754	+	15156	protein_coding	integrin subunit beta 8 [Source:HGNC Symbol;Acc:HGNC:6163]	-
ENSG00000039650	463.317	444.403	451.531	1149.68	968.146	987.53	453.084	1035.12	-1.19225	3.00938e-30	6.68076e-29	PNKP	19	49859882	49878351	-	4635	protein_coding	polynucleotide kinase 3'-phosphatase [Source:HGNC Symbol;Acc:HGNC:9154]	-
ENSG00000136159	380.824	377.845	342.202	882.549	822.736	821.759	366.957	842.348	-1.1987	3.04668e-30	6.75634e-29	NUDT15	13	48037567	48047222	+	2098	protein_coding	nudix hydrolase 15 [Source:HGNC Symbol;Acc:HGNC:23063]	-
ENSG00000057149	239.569	192.506	195.7	4.55862	0.938126	0.886472	209.258	2.12774	6.61938	3.65662e-30	8.09168e-29	SERPINB3	18	63655197	63661963	-	1777	protein_coding	serpin family B member 3 [Source:HGNC Symbol;Acc:HGNC:10569]	-
ENSG00000163683	857.702	917.477	778.427	350.102	382.755	349.27	851.202	360.709	1.23939	3.99534e-30	8.83182e-29	SMIM14	4	39546330	39639090	-	6721	protein_coding	small integral membrane protein 14 [Source:HGNC Symbol;Acc:HGNC:27321]	-
ENSG00000133302	113.004	131.068	102.77	375.63	398.703	386.502	115.614	386.945	-1.74064	4.15921e-30	9.18429e-29	SLF1	5	94618347	94739436	+	7185	protein_coding	SMC5-SMC6 complex localization factor 1 [Source:HGNC Symbol;Acc:HGNC:25408]	-
ENSG00000181938	75.7129	91.1333	91.8368	358.308	327.406	304.06	86.2277	329.924	-1.93393	4.23224e-30	9.33563e-29	GINS3	16	58295080	58406144	+	5105	protein_coding	GINS complex subunit 3 [Source:HGNC Symbol;Acc:HGNC:25851]	-
ENSG00000105372	25699.4	33625.1	23281.7	12759.6	11652.5	11503.7	27535.4	11971.9	1.20167	4.59921e-30	1.01344e-28	RPS19	19	41859918	41872926	+	3799	protein_coding	ribosomal protein S19 [Source:HGNC Symbol;Acc:HGNC:10402]	-
ENSG00000197084	709.667	772.073	715.015	320.015	240.16	278.352	732.252	279.509	1.38924	4.99671e-30	1.09869e-28	LCE1C	1	152804835	152806628	-	692	protein_coding	late cornified envelope 1C [Source:HGNC Symbol;Acc:HGNC:29464]	-
ENSG00000100726	662.205	588.782	655.977	1654.78	1390.3	1317.3	635.655	1454.13	-1.19438	5.13856e-30	1.12869e-28	TELO2	16	1493344	1510457	+	4239	protein_coding	telomere maintenance 2 [Source:HGNC Symbol;Acc:HGNC:29099]	-
ENSG00000175121	154.816	142.332	151.968	16.411	11.2575	16.843	149.705	14.8372	3.33088	6.56857e-30	1.44127e-28	WFDC5	20	45109452	45115172	-	1044	protein_coding	WAP four-disulfide core domain 5 [Source:HGNC Symbol;Acc:HGNC:20477]	-
ENSG00000276023	2237.48	2460.6	2211.74	1263.65	1061.96	1124.93	2303.27	1150.18	1.00194	6.7808e-30	1.48627e-28	DUSP14	17	37489831	37513501	+	2499	protein_coding	dual specificity phosphatase 14 [Source:HGNC Symbol;Acc:HGNC:17007]	-
ENSG00000140254	552.591	550.896	579.447	221.549	210.14	226.05	560.978	219.247	1.35496	9.22222e-30	2.01714e-28	DUOXA1	15	45117367	45129938	-	3721	protein_coding	dual oxidase maturation factor 1 [Source:HGNC Symbol;Acc:HGNC:26507]	-
ENSG00000139679	409.075	471.026	409.986	131.288	139.781	149.814	430.029	140.294	1.61635	9.36676e-30	2.0466e-28	LPAR6	13	48389567	48444704	-	4348	protein_coding	lysophosphatidic acid receptor 6 [Source:HGNC Symbol;Acc:HGNC:15520]	-
ENSG00000182040	180.807	155.643	150.875	21.8814	17.8244	19.5024	162.442	19.7361	3.03962	1.0306e-29	2.24945e-28	USH1G	17	74916084	74923256	-	3558	protein_coding	USH1 protein network component sans [Source:HGNC Symbol;Acc:HGNC:16356]	-
ENSG00000128708	739.048	917.477	700.803	1734.1	1709.27	1742.8	785.776	1728.72	-1.13644	1.51185e-29	3.29294e-28	HAT1	2	171922448	171983682	+	6790	protein_coding	histone acetyltransferase 1 [Source:HGNC Symbol;Acc:HGNC:4821]	-
ENSG00000275342	1332.32	1228.76	1403.79	673.764	622.916	629.395	1321.63	642.025	1.04126	1.83211e-29	3.978e-28	PRAG1	8	8317736	8386498	-	4904	protein_coding	PEAK1 related, kinase-activating pseudokinase 1 [Source:HGNC Symbol;Acc:HGNC:25438]	-
ENSG00000213859	961.666	765.929	822.158	362.866	295.51	269.487	849.918	309.288	1.45804	1.9571e-29	4.24495e-28	KCTD11	17	7351889	7354944	+	3056	protein_coding	potassium channel tetramerization domain containing 11 [Source:HGNC Symbol;Acc:HGNC:21302]	-
ENSG00000186638	35.0313	34.815	50.2916	212.432	215.769	262.396	40.046	230.199	-2.5248	2.02107e-29	4.37912e-28	KIF24	9	34252381	34311371	-	6131	protein_coding	kinesin family member 24 [Source:HGNC Symbol;Acc:HGNC:19916]	-
ENSG00000168300	1162.81	1290.2	1128.28	480.479	582.576	546.067	1193.77	536.374	1.15478	2.34783e-29	5.08182e-28	PCMTD1	8	51817575	51899186	-	7323	protein_coding	protein-L-isoaspartate (D-aspartate) O-methyltransferase domain containing 1 [Source:HGNC Symbol;Acc:HGNC:30483]	-
ENSG00000115687	177.417	185.338	184.767	514.213	569.442	469.83	182.507	517.828	-1.50373	2.9201e-29	6.31391e-28	PASK	2	241106099	241150264	-	10686	protein_coding	PAS domain containing serine/threonine kinase [Source:HGNC Symbol;Acc:HGNC:17270]	-
ENSG00000223745	455.407	545.776	581.633	131.288	155.729	191.478	527.605	159.498	1.72545	3.15169e-29	6.80758e-28	CCDC18-AS1	1	93262186	93346025	-	4786	processed_transcript	CCDC18 antisense RNA 1 [Source:HGNC Symbol;Acc:HGNC:52262]	-
ENSG00000089289	1010.26	1144.8	946.794	464.979	409.961	468.944	1033.95	447.961	1.2068	3.33895e-29	7.20458e-28	IGBP1	X	70133449	70166324	+	1862	protein_coding	immunoglobulin binding protein 1 [Source:HGNC Symbol;Acc:HGNC:5461]	-
ENSG00000168140	706.277	590.83	583.82	236.137	241.098	242.893	626.976	240.043	1.38442	3.85651e-29	8.29549e-28	VASN	16	4371848	4383528	+	2806	protein_coding	vasorin [Source:HGNC Symbol;Acc:HGNC:18517]	-
ENSG00000149636	197.757	210.938	190.233	535.182	520.66	523.905	199.643	526.582	-1.39846	4.00668e-29	8.6096e-28	DSN1	20	36751791	36773818	-	2739	protein_coding	DSN1 homolog, MIS12 kinetochore complex component [Source:HGNC Symbol;Acc:HGNC:16165]	-
ENSG00000167779	797.81	1014.75	762.027	351.926	288.005	292.536	858.197	310.822	1.46591	4.25642e-29	9.13679e-28	IGFBP6	12	53097436	53102345	+	1346	protein_coding	insulin like growth factor binding protein 6 [Source:HGNC Symbol;Acc:HGNC:5475]	-
ENSG00000118263	2271.39	2040.77	2517.86	1018.4	1116.37	1163.05	2276.67	1099.27	1.05006	4.30113e-29	9.22324e-28	KLF7	2	207074137	207167267	-	9262	protein_coding	Kruppel like factor 7 [Source:HGNC Symbol;Acc:HGNC:6350]	zf-C2H2
ENSG00000173805	273.47	274.424	228.499	64.7324	58.1638	55.8477	258.798	59.5813	2.11934	4.55109e-29	9.74918e-28	HAP1	17	41717742	41734644	-	6223	protein_coding	huntingtin associated protein 1 [Source:HGNC Symbol;Acc:HGNC:4812]	-
ENSG00000113916	361.614	336.886	401.24	104.848	101.318	120.56	366.58	108.909	1.74957	4.69932e-29	1.00564e-27	BCL6	3	187721377	187745727	-	5938	protein_coding	B cell CLL/lymphoma 6 [Source:HGNC Symbol;Acc:HGNC:1001]	ZBTB
ENSG00000178726	332.233	324.598	266.764	62.909	87.2457	76.2366	307.865	75.4638	2.02938	4.77063e-29	1.01984e-27	THBD	20	23045633	23049741	-	4109	protein_coding	thrombomodulin [Source:HGNC Symbol;Acc:HGNC:11784]	-
ENSG00000087074	1856.66	2072.51	1695.7	933.606	831.18	929.023	1874.96	897.936	1.06226	5.23833e-29	1.11868e-27	PPP1R15A	19	48872392	48876057	+	3093	protein_coding	protein phosphatase 1 regulatory subunit 15A [Source:HGNC Symbol;Acc:HGNC:14375]	-
ENSG00000095970	204.538	157.691	203.353	30.0869	30.9582	25.7077	188.527	28.9176	2.7049	5.65637e-29	1.20671e-27	TREM2	6	41158506	41163186	-	1095	protein_coding	triggering receptor expressed on myeloid cells 2 [Source:HGNC Symbol;Acc:HGNC:17761]	-
ENSG00000153802	702.886	663.532	752.188	267.135	262.675	316.47	706.202	282.094	1.32285	5.84867e-29	1.24518e-27	TMPRSS11D	4	67820876	67884032	-	3294	protein_coding	transmembrane serine protease 11D [Source:HGNC Symbol;Acc:HGNC:24059]	-
ENSG00000203785	192.107	166.907	151.968	15.4993	15.01	28.3671	170.327	19.6255	3.11141	6.28883e-29	1.33752e-27	SPRR2E	1	153093135	153106184	-	734	protein_coding	small proline rich protein 2E [Source:HGNC Symbol;Acc:HGNC:11265]	-
ENSG00000130204	1046.42	984.035	979.593	2410.6	1968.19	1952.01	1003.35	2110.27	-1.0728	7.69938e-29	1.63251e-27	TOMM40	19	44890569	44903689	+	3610	protein_coding	translocase of outer mitochondrial membrane 40 [Source:HGNC Symbol;Acc:HGNC:18001]	-
ENSG00000159337	215.838	131.068	155.248	18.2345	17.8244	13.2971	167.385	16.452	3.34733	8.15494e-29	1.72733e-27	PLA2G4D	15	42067009	42094554	-	5138	protein_coding	phospholipase A2 group IVD [Source:HGNC Symbol;Acc:HGNC:30038]	-
ENSG00000165449	154.816	135.164	177.114	433.069	517.845	484.9	155.698	478.605	-1.62152	8.2034e-29	1.73583e-27	SLC16A9	10	59650761	59736002	-	4429	protein_coding	solute carrier family 16 member 9 [Source:HGNC Symbol;Acc:HGNC:23520]	-
ENSG00000090238	897.254	826.343	860.424	417.57	361.178	358.135	861.34	378.961	1.18424	9.07145e-29	1.91756e-27	YPEL3	16	30092314	30096915	-	3181	protein_coding	yippee like 3 [Source:HGNC Symbol;Acc:HGNC:18327]	-
ENSG00000099901	1396.73	1554.39	1282.44	3079.8	2680.23	2737.43	1411.18	2832.49	-1.00476	9.14931e-29	1.93205e-27	RANBP1	22	20115938	20127357	+	4622	protein_coding	RAN binding protein 1 [Source:HGNC Symbol;Acc:HGNC:9847]	-
ENSG00000100479	13.5605	50.1745	25.1458	247.077	227.965	245.553	29.6269	240.198	-3.00344	1.08927e-28	2.29786e-27	POLE2	14	49643555	49688422	-	2955	protein_coding	DNA polymerase epsilon 2, accessory subunit [Source:HGNC Symbol;Acc:HGNC:9178]	-
ENSG00000145220	332.233	297.975	324.709	701.116	758.944	773.89	318.305	744.65	-1.22712	1.11015e-28	2.33953e-27	LYAR	4	4267701	4290169	-	2319	protein_coding	Ly1 antibody reactive [Source:HGNC Symbol;Acc:HGNC:26021]	-
ENSG00000070950	299.461	284.664	327.989	706.586	762.696	697.653	304.038	722.312	-1.24878	1.4471e-28	3.03731e-27	RAD18	3	8775402	8963773	-	6983	protein_coding	RAD18, E3 ubiquitin protein ligase [Source:HGNC Symbol;Acc:HGNC:18278]	-
ENSG00000070444	767.299	636.909	690.963	293.575	286.128	250.872	698.39	276.858	1.33469	1.79698e-28	3.76786e-27	MNT	17	2384060	2401118	-	8728	protein_coding	MAX network transcriptional repressor [Source:HGNC Symbol;Acc:HGNC:7188]	bHLH
ENSG00000064195	197.757	194.554	220.846	18.2345	38.4632	37.2318	204.386	31.3098	2.70675	1.87262e-28	3.92251e-27	DLX3	17	49990005	49995224	-	2715	protein_coding	distal-less homeobox 3 [Source:HGNC Symbol;Acc:HGNC:2916]	Homeobox
ENSG00000240386	200.018	157.691	198.98	30.0869	27.2056	31.0265	185.563	29.4397	2.65386	1.88341e-28	3.94113e-27	LCE1F	1	152776372	152776728	+	357	protein_coding	late cornified envelope 1F [Source:HGNC Symbol;Acc:HGNC:29467]	-
ENSG00000181652	188.717	96.2531	165.088	2.73517	7.50501	6.2053	150.019	5.48183	4.77485	2.26618e-28	4.73733e-27	ATG9B	7	151012209	151024499	-	6391	protein_coding	autophagy related 9B [Source:HGNC Symbol;Acc:HGNC:21899]	-
ENSG00000105514	1336.84	1121.25	1328.35	597.179	576.947	606.347	1262.15	593.491	1.08787	2.31026e-28	4.8246e-27	RAB3D	19	11322046	11346270	-	4417	protein_coding	RAB3D, member RAS oncogene family [Source:HGNC Symbol;Acc:HGNC:9779]	-
ENSG00000136155	222.618	241.657	240.525	45.5862	57.2257	54.9613	234.933	52.5911	2.16005	2.52377e-28	5.26521e-27	SCEL	13	77535674	77645263	+	4205	protein_coding	sciellin [Source:HGNC Symbol;Acc:HGNC:10573]	-
ENSG00000131171	1273.56	1449.94	1293.37	609.032	654.812	687.016	1338.96	650.286	1.04227	3.12948e-28	6.50927e-27	SH3BGRL	X	81201943	81298547	+	2304	protein_coding	SH3 domain binding glutamate rich protein like [Source:HGNC Symbol;Acc:HGNC:10823]	-
ENSG00000078269	328.842	359.413	399.053	831.493	809.603	834.17	362.436	825.088	-1.18649	3.642e-28	7.56771e-27	SYNJ2	6	157981887	158099176	+	12493	protein_coding	synaptojanin 2 [Source:HGNC Symbol;Acc:HGNC:11504]	-
ENSG00000101825	153.686	114.685	141.035	6.38207	10.3194	13.2971	136.469	9.99951	3.76636	4.17227e-28	8.65225e-27	MXRA5	X	3308565	3346641	-	9793	protein_coding	matrix remodeling associated 5 [Source:HGNC Symbol;Acc:HGNC:7539]	-
ENSG00000031691	74.5828	89.0853	55.7581	287.193	328.344	296.082	73.1421	303.873	-2.05136	4.52618e-28	9.37681e-27	CENPQ	6	49463378	49493107	+	1733	protein_coding	centromere protein Q [Source:HGNC Symbol;Acc:HGNC:21347]	-
ENSG00000087087	1132.3	981.987	1192.79	2421.54	2105.15	2182.49	1102.36	2236.4	-1.02119	4.87505e-28	1.00795e-26	SRRT	7	100875111	100888664	+	4850	protein_coding	serrate, RNA effector molecule [Source:HGNC Symbol;Acc:HGNC:24101]	-
ENSG00000148346	483.658	345.078	401.24	128.553	113.513	117.014	409.992	119.694	1.77484	5.29755e-28	1.09421e-26	LCN2	9	128149071	128153455	+	1598	protein_coding	lipocalin 2 [Source:HGNC Symbol;Acc:HGNC:6526]	-
ENSG00000127946	376.304	366.581	405.613	791.377	967.208	949.411	382.833	902.665	-1.23773	6.10274e-28	1.25678e-26	HIP1	7	75533300	75738962	-	8953	protein_coding	huntingtin interacting protein 1 [Source:HGNC Symbol;Acc:HGNC:4913]	-
ENSG00000176978	1250.96	1410.01	1221.21	664.647	573.195	554.931	1294.06	597.591	1.11514	6.77797e-28	1.39445e-26	DPP7	9	137110542	137115177	-	2820	protein_coding	dipeptidyl peptidase 7 [Source:HGNC Symbol;Acc:HGNC:14892]	-
ENSG00000124743	135.605	124.924	141.035	11.8524	13.1338	12.4106	133.855	12.4656	3.42472	7.85276e-28	1.61238e-26	KLHL31	6	53647901	53665708	-	5743	protein_coding	kelch like family member 31 [Source:HGNC Symbol;Acc:HGNC:21353]	-
ENSG00000012963	280.251	258.04	319.242	657.353	717.666	730.453	285.844	701.824	-1.29682	9.15231e-28	1.87735e-26	UBR7	14	93207056	93229215	+	3694	protein_coding	ubiquitin protein ligase E3 component n-recognin 7 (putative) [Source:HGNC Symbol;Acc:HGNC:20344]	-
ENSG00000154127	231.659	224.249	249.271	563.446	602.277	578.866	235.06	581.53	-1.3072	9.41728e-28	1.9298e-26	UBASH3B	11	122655675	122814473	+	9011	protein_coding	ubiquitin associated and SH3 domain containing B [Source:HGNC Symbol;Acc:HGNC:29884]	-
ENSG00000163453	4627.52	5326.69	4156.71	2504.51	2293.72	2153.24	4703.64	2317.15	1.02163	1.08079e-27	2.2104e-26	IGFBP7	4	57030773	57110385	-	1930	protein_coding	insulin like growth factor binding protein 7 [Source:HGNC Symbol;Acc:HGNC:5476]	-
ENSG00000162062	70.0626	65.534	56.8514	349.19	253.294	262.396	64.1494	288.293	-2.16848	1.11921e-27	2.28672e-26	TEDC2	16	2460080	2464963	+	2854	protein_coding	tubulin epsilon and delta complex 2 [Source:HGNC Symbol;Acc:HGNC:25849]	-
ENSG00000104518	444.107	457.714	455.904	1149.68	1013.18	915.725	452.575	1026.2	-1.18076	1.1631e-27	2.37407e-26	GSDMD	8	143553207	143563062	+	5116	protein_coding	gasdermin D [Source:HGNC Symbol;Acc:HGNC:25697]	-
ENSG00000083720	433.936	484.338	501.823	1022.95	1045.07	960.049	473.366	1009.36	-1.09166	1.2128e-27	2.47308e-26	OXCT1	5	41730065	41870519	-	4194	protein_coding	3-oxoacid CoA-transferase 1 [Source:HGNC Symbol;Acc:HGNC:8527]	-
ENSG00000169689	244.089	254.968	241.618	696.557	569.442	622.303	246.892	629.434	-1.34993	1.22494e-27	2.4954e-26	CENPX	17	82018702	82024107	-	1531	protein_coding	centromere protein X [Source:HGNC Symbol;Acc:HGNC:11422]	-
ENSG00000132821	206.798	194.554	189.14	36.469	42.2157	36.3453	196.831	38.3433	2.3608	1.40383e-27	2.85422e-26	VSTM2L	20	37903104	37945350	+	1959	protein_coding	V-set and transmembrane domain containing 2 like [Source:HGNC Symbol;Acc:HGNC:16096]	-
ENSG00000175315	258.78	192.506	209.913	47.4097	42.2157	30.14	220.4	39.9218	2.46573	1.42307e-27	2.89051e-26	CST6	11	66011841	66013505	+	759	protein_coding	cystatin E/M [Source:HGNC Symbol;Acc:HGNC:2478]	-
ENSG00000140465	181.937	224.249	192.42	41.0276	37.525	33.6859	199.535	37.4129	2.41688	1.51236e-27	3.06889e-26	CYP1A1	15	74719542	74725610	-	3435	protein_coding	cytochrome P450 family 1 subfamily A member 1 [Source:HGNC Symbol;Acc:HGNC:2595]	-
ENSG00000050344	310.762	318.455	299.563	721.174	692.337	690.562	309.593	701.357	-1.17947	1.63483e-27	3.31415e-26	NFE2L3	7	26152240	26187125	+	4249	protein_coding	nuclear factor, erythroid 2 like 3 [Source:HGNC Symbol;Acc:HGNC:7783]	TF_bZIP
ENSG00000105516	204.538	273.4	196.793	38.2924	31.8963	49.6424	224.91	39.9437	2.49173	2.00796e-27	4.06264e-26	DBP	19	48630030	48637438	-	6544	protein_coding	D-box binding PAR bZIP transcription factor [Source:HGNC Symbol;Acc:HGNC:2697]	TF_bZIP
ENSG00000177551	210.188	202.746	238.338	47.4097	37.525	49.6424	217.091	44.859	2.27261	2.28407e-27	4.6168e-26	NHLH2	1	115836377	115843917	-	7541	protein_coding	nescient helix-loop-helix 2 [Source:HGNC Symbol;Acc:HGNC:7818]	bHLH
ENSG00000178966	68.9326	95.2292	99.4899	309.075	349.921	318.243	87.8839	325.746	-1.88706	2.41332e-27	4.86859e-26	RMI1	9	83980711	84004074	+	3507	protein_coding	RecQ mediated genome instability 1 [Source:HGNC Symbol;Acc:HGNC:25764]	-
ENSG00000111252	498.349	423.923	563.047	1174.3	1076.03	1118.73	495.106	1123.02	-1.18271	2.62207e-27	5.27947e-26	SH2B3	12	111405948	111451623	+	5682	protein_coding	SH2B adaptor protein 3 [Source:HGNC Symbol;Acc:HGNC:29605]	-
ENSG00000138061	160.466	190.458	148.688	19.1462	29.0819	21.2753	166.538	23.1678	2.84936	2.75719e-27	5.54615e-26	CYP1B1	2	38066973	38109902	-	6014	protein_coding	cytochrome P450 family 1 subfamily B member 1 [Source:HGNC Symbol;Acc:HGNC:2597]	-
ENSG00000180354	1037.38	1111.01	962.1	485.037	493.454	511.494	1036.83	496.662	1.06207	2.87549e-27	5.77851e-26	MTURN	7	30134810	30162762	+	6532	protein_coding	maturin, neural progenitor differentiation regulator homolog [Source:HGNC Symbol;Acc:HGNC:25457]	-
ENSG00000111863	1043.03	1207.26	1073.62	480.479	519.722	554.045	1107.97	518.082	1.09698	3.04959e-27	6.12245e-26	ADTRP	6	11712054	11807046	-	4150	protein_coding	androgen dependent TFPI regulating protein [Source:HGNC Symbol;Acc:HGNC:21214]	-
ENSG00000116661	1453.23	1566.67	1306.49	712.057	546.927	654.216	1442.13	637.733	1.17704	3.08878e-27	6.19516e-26	FBXO2	1	11637018	11655785	-	3416	protein_coding	F-box protein 2 [Source:HGNC Symbol;Acc:HGNC:13581]	-
ENSG00000197506	201.148	208.89	180.394	25.5283	44.0919	33.6859	196.81	34.4354	2.51735	3.76979e-27	7.53923e-26	SLC28A3	9	84275457	84340683	-	5063	protein_coding	solute carrier family 28 member 3 [Source:HGNC Symbol;Acc:HGNC:16484]	-
ENSG00000146966	14.6906	19.4554	20.7726	153.17	151.976	156.906	18.3062	154.017	-3.06923	3.7818e-27	7.55596e-26	DENND2A	7	140518420	140673993	-	5148	protein_coding	DENN domain containing 2A [Source:HGNC Symbol;Acc:HGNC:22212]	-
ENSG00000156804	183.067	181.243	161.808	27.3517	32.8344	29.2536	175.372	29.8132	2.55742	4.05492e-27	8.0861e-26	FBXO32	8	123497889	123541206	-	7395	protein_coding	F-box protein 32 [Source:HGNC Symbol;Acc:HGNC:16731]	-
ENSG00000137804	12.4305	15.3595	15.3061	155.905	140.719	138.29	14.3654	144.971	-3.33192	4.22061e-27	8.40844e-26	NUSAP1	15	41332694	41381050	+	2875	protein_coding	nucleolar and spindle associated protein 1 [Source:HGNC Symbol;Acc:HGNC:18538]	-
ENSG00000244694	157.076	153.595	133.382	20.9697	18.7625	15.9565	148.018	18.5629	2.99663	4.47669e-27	8.91007e-26	PTCHD4	6	47878028	48068689	-	5177	protein_coding	patched domain containing 4 [Source:HGNC Symbol;Acc:HGNC:21345]	-
ENSG00000014138	80.233	58.3663	67.7843	287.193	284.252	253.531	68.7945	274.992	-2.0025	6.0564e-27	1.20197e-25	POLA2	11	65261762	65305589	+	5726	protein_coding	DNA polymerase alpha 2, accessory subunit [Source:HGNC Symbol;Acc:HGNC:30073]	-
ENSG00000159164	358.223	387.06	426.385	853.374	833.056	920.158	390.556	868.863	-1.15347	6.11801e-27	1.21188e-25	SV2A	1	149903318	149917882	-	4824	protein_coding	synaptic vesicle glycoprotein 2A [Source:HGNC Symbol;Acc:HGNC:20566]	-
ENSG00000131470	49.7219	36.8629	27.3324	248.901	189.501	218.959	37.9724	219.12	-2.53216	6.85298e-27	1.35488e-25	PSMC3IP	17	42572315	42577831	-	2573	protein_coding	PSMC3 interacting protein [Source:HGNC Symbol;Acc:HGNC:17928]	-
ENSG00000160867	115.264	94.2052	88.557	359.219	309.582	356.362	99.3422	341.721	-1.78455	6.87777e-27	1.35849e-25	FGFR4	5	177086886	177098144	+	4829	protein_coding	fibroblast growth factor receptor 4 [Source:HGNC Symbol;Acc:HGNC:3691]	-
ENSG00000146038	19.2107	9.21573	17.4927	154.081	167.925	134.744	15.3064	152.25	-3.32544	7.35841e-27	1.45205e-25	DCDC2	6	24171756	24358052	-	4996	protein_coding	doublecortin domain containing 2 [Source:HGNC Symbol;Acc:HGNC:18141]	-
ENSG00000188293	113.004	149.5	119.169	3.6469	2.81438	5.31883	127.224	3.9267	5.0118	8.48127e-27	1.66887e-25	IGFL1	19	46229752	46231243	+	769	protein_coding	IGF like family member 1 [Source:HGNC Symbol;Acc:HGNC:24093]	-
ENSG00000106733	674.635	744.426	736.881	320.015	333.035	297.855	718.648	316.968	1.1818	8.49576e-27	1.67014e-25	NMRK1	9	75060573	75088217	-	3865	protein_coding	nicotinamide riboside kinase 1 [Source:HGNC Symbol;Acc:HGNC:26057]	-
ENSG00000268460	190.977	206.842	232.872	43.7628	39.4013	47.8695	210.23	43.6778	2.26583	9.10442e-27	1.78472e-25	AC006262.1	19	46203426	46214837	+	5911	processed_transcript	uncharacterized LOC93429 [Source:NCBI gene;Acc:93429]	-
ENSG00000105137	167.246	148.476	185.86	495.066	447.486	457.419	167.194	466.657	-1.48231	1.00966e-26	1.97736e-25	SYDE1	19	15107403	15114988	+	3965	protein_coding	synapse defective Rho GTPase homolog 1 [Source:HGNC Symbol;Acc:HGNC:25824]	-
ENSG00000116678	457.667	564.207	494.17	168.669	182.935	198.57	505.348	183.391	1.46288	1.01297e-26	1.98197e-25	LEPR	1	65420652	65641559	+	11370	protein_coding	leptin receptor [Source:HGNC Symbol;Acc:HGNC:6554]	-
ENSG00000161036	372.914	362.485	348.761	898.049	801.159	754.388	361.387	817.865	-1.17834	1.46633e-26	2.85824e-25	LRWD1	7	102464929	102473168	+	5926	protein_coding	leucine rich repeats and WD repeat domain containing 1 [Source:HGNC Symbol;Acc:HGNC:21769]	-
ENSG00000134765	219.228	139.26	127.916	2.73517	3.7525	0.886472	162.135	2.45805	6.0565	1.56065e-26	3.03924e-25	DSC1	18	31129236	31162856	-	4271	protein_coding	desmocollin 1 [Source:HGNC Symbol;Acc:HGNC:3035]	-
ENSG00000147224	375.174	347.126	426.385	889.843	849.004	827.078	382.895	855.308	-1.16023	1.58766e-26	3.08895e-25	PRPS1	X	107628424	107651026	+	2623	protein_coding	phosphoribosyl pyrophosphate synthetase 1 [Source:HGNC Symbol;Acc:HGNC:9462]	-
ENSG00000162738	1287.12	1161.18	1256.2	570.739	657.626	539.861	1234.83	589.409	1.06721	1.61392e-26	3.1371e-25	VANGL2	1	160400586	160428678	+	5340	protein_coding	VANGL planar cell polarity protein 2 [Source:HGNC Symbol;Acc:HGNC:15511]	-
ENSG00000131037	1481.49	1485.78	1345.85	769.495	687.646	615.211	1437.7	690.784	1.05777	1.67302e-26	3.24894e-25	EPS8L1	19	55072020	55087923	+	5341	protein_coding	EPS8 like 1 [Source:HGNC Symbol;Acc:HGNC:21295]	-
ENSG00000106462	176.287	176.123	197.887	504.184	464.372	479.581	183.432	482.712	-1.39626	1.77677e-26	3.44398e-25	EZH2	7	148807383	148884321	-	4522	protein_coding	enhancer of zeste 2 polycomb repressive complex 2 subunit [Source:HGNC Symbol;Acc:HGNC:3527]	-
ENSG00000273033	476.878	452.595	432.945	175.963	172.615	171.089	454.139	173.222	1.39035	2.5472e-26	4.92355e-25	LINC02035	3	122886941	122892416	+	5476	lincRNA	long intergenic non-protein coding RNA 2035 [Source:HGNC Symbol;Acc:HGNC:52875]	-
ENSG00000102879	343.533	283.64	301.75	723.909	690.461	727.793	309.641	714.054	-1.20702	2.62412e-26	5.06753e-25	CORO1A	16	30182827	30189076	+	4871	protein_coding	coronin 1A [Source:HGNC Symbol;Acc:HGNC:2252]	-
ENSG00000120256	313.022	273.4	301.75	82.9669	92.8745	84.2148	296.057	86.6854	1.7719	3.17539e-26	6.1264e-25	LRP11	6	149818798	149864026	-	5652	protein_coding	LDL receptor related protein 11 [Source:HGNC Symbol;Acc:HGNC:16936]	-
ENSG00000162551	45.2017	41.9827	26.2391	215.167	236.408	184.386	37.8079	211.987	-2.48648	3.2966e-26	6.35436e-25	ALPL	1	21509372	21578412	+	3007	protein_coding	alkaline phosphatase, liver/bone/kidney [Source:HGNC Symbol;Acc:HGNC:438]	-
ENSG00000108602	141.255	134.14	150.875	15.4993	14.0719	22.1618	142.09	17.2443	3.03817	3.70168e-26	7.12856e-25	ALDH3A1	17	19737984	19748943	-	3918	protein_coding	aldehyde dehydrogenase 3 family member A1 [Source:HGNC Symbol;Acc:HGNC:405]	-
ENSG00000004864	262.17	264.184	297.376	628.178	641.678	637.373	274.577	635.743	-1.21139	4.90177e-26	9.39612e-25	SLC25A13	7	96120220	96322147	-	3710	protein_coding	solute carrier family 25 member 13 [Source:HGNC Symbol;Acc:HGNC:10983]	-
ENSG00000178363	171.766	152.571	131.195	20.0579	20.6388	22.1618	151.844	20.9528	2.85637	5.15032e-26	9.86346e-25	CALML3	10	5524009	5526771	+	2763	protein_coding	calmodulin like 3 [Source:HGNC Symbol;Acc:HGNC:1452]	-
ENSG00000156876	72.3227	74.7498	65.5977	252.548	276.747	266.828	70.8901	265.374	-1.90355	5.47655e-26	1.04786e-24	SASS6	1	100083563	100132955	-	3972	protein_coding	SAS-6 centriolar assembly protein [Source:HGNC Symbol;Acc:HGNC:25403]	-
ENSG00000137857	2060.07	1693.65	2213.92	935.429	946.569	990.189	1989.21	957.396	1.05453	5.52765e-26	1.05666e-24	DUOX1	15	45129933	45165576	+	8784	protein_coding	dual oxidase 1 [Source:HGNC Symbol;Acc:HGNC:3062]	-
ENSG00000146833	952.626	977.891	873.543	456.774	437.167	466.284	934.687	453.408	1.04363	7.97539e-26	1.52177e-24	TRIM4	7	99876958	99919600	-	4891	protein_coding	tripartite motif containing 4 [Source:HGNC Symbol;Acc:HGNC:16275]	-
ENSG00000120471	423.766	403.444	393.586	154.993	141.657	149.814	406.932	148.821	1.4507	8.09838e-26	1.54382e-24	TP53AIP1	11	128934731	128943399	-	3445	protein_coding	tumor protein p53 regulated apoptosis inducing protein 1 [Source:HGNC Symbol;Acc:HGNC:29984]	-
ENSG00000133056	718.707	608.238	702.989	258.93	303.953	284.557	676.645	282.48	1.25983	8.52689e-26	1.62402e-24	PIK3C2B	1	204422628	204494724	-	9414	protein_coding	phosphatidylinositol-4-phosphate 3-kinase catalytic subunit type 2 beta [Source:HGNC Symbol;Acc:HGNC:8972]	-
ENSG00000163395	136.735	114.685	111.516	5.47035	4.69063	12.4106	120.979	7.52386	3.996	9.19711e-26	1.75006e-24	IGFN1	1	201190825	201228952	+	12116	protein_coding	immunoglobulin-like and fibronectin type III domain containing 1 [Source:HGNC Symbol;Acc:HGNC:24607]	-
ENSG00000126216	438.457	488.433	473.397	946.37	976.589	929.909	466.762	950.956	-1.02585	9.51707e-26	1.80929e-24	TUBGCP3	13	112485005	112588205	-	7254	protein_coding	tubulin gamma complex associated protein 3 [Source:HGNC Symbol;Acc:HGNC:18598]	-
ENSG00000146281	185.327	182.267	182.58	436.716	591.957	534.543	183.391	521.072	-1.50647	1.00367e-25	1.90633e-24	PM20D2	6	89146050	89165565	+	4708	protein_coding	peptidase M20 domain containing 2 [Source:HGNC Symbol;Acc:HGNC:21408]	-
ENSG00000244405	511.909	463.858	563.047	1024.78	1073.22	1105.43	512.938	1067.81	-1.05863	1.08477e-25	2.05662e-24	ETV5	3	186046308	186110318	-	5802	protein_coding	ETS variant 5 [Source:HGNC Symbol;Acc:HGNC:3494]	ETS
ENSG00000103811	250.869	267.256	256.925	63.8207	76.9263	70.9178	258.35	70.5549	1.87341	1.09894e-25	2.08158e-24	CTSH	15	78921058	78949574	-	5892	protein_coding	cathepsin H [Source:HGNC Symbol;Acc:HGNC:2535]	-
ENSG00000174718	753.738	773.097	706.269	327.309	308.643	363.453	744.368	333.135	1.15944	1.23797e-25	2.34065e-24	KIAA1551	12	31959370	31993107	+	6646	protein_coding	KIAA1551 [Source:HGNC Symbol;Acc:HGNC:25559]	-
ENSG00000142856	106.224	156.667	107.143	386.571	411.837	408.664	123.345	402.357	-1.70158	1.31209e-25	2.47853e-24	ITGB3BP	1	63440770	63593721	-	5459	protein_coding	integrin subunit beta 3 binding protein [Source:HGNC Symbol;Acc:HGNC:6157]	-
ENSG00000141499	161.596	151.547	159.621	487.773	423.095	408.664	157.588	439.844	-1.48141	1.32578e-25	2.50212e-24	WRAP53	17	7686071	7703502	+	5087	protein_coding	WD repeat containing antisense to TP53 [Source:HGNC Symbol;Acc:HGNC:25522]	-
ENSG00000130005	522.08	613.358	504.009	229.755	166.986	178.181	546.482	191.641	1.51218	1.4748e-25	2.7758e-24	GAMT	19	1397026	1401570	-	2403	protein_coding	guanidinoacetate N-methyltransferase [Source:HGNC Symbol;Acc:HGNC:4136]	-
ENSG00000181481	622.653	588.782	603.499	273.517	268.304	247.326	604.978	263.049	1.20164	1.5347e-25	2.88594e-24	RNF135	17	30968785	30999911	+	3580	protein_coding	ring finger protein 135 [Source:HGNC Symbol;Acc:HGNC:21158]	-
ENSG00000129455	360.484	333.814	295.19	101.201	53.4732	85.9878	329.829	80.2208	2.03751	1.79373e-25	3.36997e-24	KLK8	19	50996007	51002711	-	1865	protein_coding	kallikrein related peptidase 8 [Source:HGNC Symbol;Acc:HGNC:6369]	-
ENSG00000185480	56.5021	64.5101	47.0117	226.108	264.551	229.596	56.008	240.085	-2.09706	1.85638e-25	3.48453e-24	PARPBP	12	102120185	102197520	+	4745	protein_coding	PARP1 binding protein [Source:HGNC Symbol;Acc:HGNC:26074]	-
ENSG00000059728	500.609	509.937	476.677	200.579	192.316	209.207	495.741	200.701	1.30428	1.96923e-25	3.68969e-24	MXD1	2	69897688	69942945	+	6351	protein_coding	MAX dimerization protein 1 [Source:HGNC Symbol;Acc:HGNC:6761]	bHLH
ENSG00000166845	289.291	309.239	330.175	665.559	849.942	733.999	309.568	749.833	-1.27575	2.49238e-25	4.6657e-24	C18orf54	18	54357917	54385218	+	6165	protein_coding	chromosome 18 open reading frame 54 [Source:HGNC Symbol;Acc:HGNC:13796]	-
ENSG00000074410	2101.88	1666	2350.59	894.402	830.241	969.8	2039.49	898.148	1.1826	2.55816e-25	4.78451e-24	CA12	15	63321378	63382161	-	7313	protein_coding	carbonic anhydrase 12 [Source:HGNC Symbol;Acc:HGNC:1371]	-
ENSG00000166974	151.426	160.763	161.808	391.13	467.187	456.533	157.999	438.283	-1.4714	3.10251e-25	5.78698e-24	MAPRE2	18	34976928	35143470	+	6180	protein_coding	microtubule associated protein RP/EB family member 2 [Source:HGNC Symbol;Acc:HGNC:6891]	-
ENSG00000160233	307.372	304.119	337.828	109.407	90.0601	97.5119	316.44	98.993	1.67593	3.41172e-25	6.35805e-24	LRRC3	21	44455486	44462196	+	5869	protein_coding	leucine rich repeat containing 3 [Source:HGNC Symbol;Acc:HGNC:14965]	-
ENSG00000116032	231.659	223.225	254.738	66.5559	59.1019	54.0748	236.541	59.9109	1.98143	3.46976e-25	6.46041e-24	GRIN3B	19	1000419	1009732	+	3281	protein_coding	glutamate ionotropic receptor NMDA type subunit 3B [Source:HGNC Symbol;Acc:HGNC:16768]	-
ENSG00000152256	90.4034	79.8696	88.557	278.076	299.262	294.309	86.2767	290.549	-1.75323	3.83563e-25	7.12885e-24	PDK1	2	172555373	172608669	+	14883	protein_coding	pyruvate dehydrogenase kinase 1 [Source:HGNC Symbol;Acc:HGNC:8809]	-
ENSG00000179846	129.955	101.373	113.703	5.47035	10.3194	7.09178	115.01	7.62717	3.9177	4.83141e-25	8.96356e-24	NKPD1	19	45149750	45158737	-	4310	protein_coding	NTPase KAP family P-loop domain containing 1 [Source:HGNC Symbol;Acc:HGNC:24739]	-
ENSG00000164096	1829.54	2407.35	1455.18	737.585	726.109	726.02	1897.36	729.905	1.37861	6.25957e-25	1.15821e-23	C4orf3	4	119296419	119304445	-	3148	protein_coding	chromosome 4 open reading frame 3 [Source:HGNC Symbol;Acc:HGNC:19225]	-
ENSG00000120800	472.358	441.331	460.278	882.549	939.064	942.32	457.989	921.311	-1.00889	7.12834e-25	1.31779e-23	UTP20	12	101280109	101386616	+	10024	protein_coding	UTP20, small subunit processome component [Source:HGNC Symbol;Acc:HGNC:17897]	-
ENSG00000049192	211.318	188.41	223.032	511.477	513.155	511.494	207.587	512.042	-1.30379	7.50593e-25	1.38636e-23	ADAMTS6	5	65148736	65481920	-	8567	protein_coding	ADAM metallopeptidase with thrombospondin type 1 motif 6 [Source:HGNC Symbol;Acc:HGNC:222]	-
ENSG00000261061	10.1704	19.4554	17.4927	148.611	132.276	140.949	15.7062	140.612	-3.15339	7.68072e-25	1.41739e-23	AC092718.4	16	81030770	81031485	+	716	sense_intronic	novel transcript	-
ENSG00000178202	137.865	127.996	144.315	352.837	419.342	419.301	136.725	397.16	-1.53933	8.02804e-25	1.48017e-23	KDELC2	11	108472105	108498432	-	4993	protein_coding	KDEL motif containing 2 [Source:HGNC Symbol;Acc:HGNC:28496]	-
ENSG00000153029	1281.47	1199.07	1219.02	492.331	599.462	646.238	1233.19	579.344	1.08953	8.21567e-25	1.51342e-23	MR1	1	181033425	181061938	+	9348	protein_coding	major histocompatibility complex, class I-related [Source:HGNC Symbol;Acc:HGNC:4975]	-
ENSG00000183196	16.9506	11.2637	19.6793	131.288	150.1	139.176	15.9645	140.188	-3.14141	8.42968e-25	1.55146e-23	CHST6	16	75472052	75495445	-	8620	protein_coding	carbohydrate sulfotransferase 6 [Source:HGNC Symbol;Acc:HGNC:6938]	-
ENSG00000169252	446.367	431.091	402.333	152.258	170.739	162.224	426.597	161.74	1.39938	8.65829e-25	1.59213e-23	ADRB2	5	148825245	148828687	+	3443	protein_coding	adrenoceptor beta 2 [Source:HGNC Symbol;Acc:HGNC:286]	-
ENSG00000118194	107.354	108.541	112.609	6.38207	2.81438	7.97825	109.501	5.7249	4.24778	1.16743e-24	2.14105e-23	TNNT2	1	201359008	201377762	-	7259	protein_coding	troponin T2, cardiac type [Source:HGNC Symbol;Acc:HGNC:11949]	-
ENSG00000135549	169.506	248.825	169.461	33.7338	30.02	39.8912	195.931	34.5484	2.50352	1.55508e-24	2.83946e-23	PKIB	6	122471917	122726373	+	3432	protein_coding	cAMP-dependent protein kinase inhibitor beta [Source:HGNC Symbol;Acc:HGNC:9018]	-
ENSG00000130313	1440.8	1657.81	1344.75	778.613	668.884	720.702	1481.12	722.733	1.03542	1.63364e-24	2.98029e-23	PGLS	19	17511629	17521288	+	2847	protein_coding	6-phosphogluconolactonase [Source:HGNC Symbol;Acc:HGNC:8903]	-
ENSG00000240038	170.636	198.65	190.233	44.6745	26.2675	35.4589	186.507	35.467	2.3935	1.67316e-24	3.04969e-23	AMY2B	1	103553815	103579534	+	7491	protein_coding	amylase, alpha 2B (pancreatic) [Source:HGNC Symbol;Acc:HGNC:478]	-
ENSG00000224032	401.165	513.009	362.974	127.641	135.09	148.041	425.716	136.924	1.63723	1.83211e-24	3.3365e-23	EPB41L4A-AS1	5	112160526	112164276	+	3344	lincRNA	EPB41L4A antisense RNA 1 [Source:HGNC Symbol;Acc:HGNC:30749]	-
ENSG00000185100	218.098	185.338	177.114	31.9104	45.03	41.6642	193.517	39.5349	2.29118	1.93593e-24	3.52247e-23	ADSSL1	14	104724186	104747325	+	5775	protein_coding	adenylosuccinate synthase like 1 [Source:HGNC Symbol;Acc:HGNC:20093]	-
ENSG00000154227	716.447	750.57	647.231	331.868	298.324	320.903	704.749	317.032	1.15251	2.08671e-24	3.79019e-23	CERS3	15	100400395	100544995	-	5130	protein_coding	ceramide synthase 3 [Source:HGNC Symbol;Acc:HGNC:23752]	Homeobox
ENSG00000181577	109.614	63.4861	99.4899	340.073	308.643	349.27	90.8634	332.662	-1.87777	2.13688e-24	3.87699e-23	C6orf223	6	44000580	44005958	+	3917	protein_coding	chromosome 6 open reading frame 223 [Source:HGNC Symbol;Acc:HGNC:28692]	-
ENSG00000168386	950.366	848.871	991.619	468.626	417.466	446.782	930.285	444.291	1.06546	2.13823e-24	3.87699e-23	FILIP1L	3	99830141	100114513	-	5903	protein_coding	filamin A interacting protein 1 like [Source:HGNC Symbol;Acc:HGNC:24589]	-
ENSG00000186007	141.255	166.907	121.356	22.7931	18.7625	15.07	143.173	18.8752	2.92583	2.33955e-24	4.23094e-23	LEMD1	1	205381378	205457091	-	2199	protein_coding	LEM domain containing 1 [Source:HGNC Symbol;Acc:HGNC:18725]	-
ENSG00000101213	1315.37	1196	1250.73	661.912	501.897	608.12	1254.03	590.643	1.08553	2.92133e-24	5.27847e-23	PTK6	20	63528001	63537370	-	2947	protein_coding	protein tyrosine kinase 6 [Source:HGNC Symbol;Acc:HGNC:9617]	-
ENSG00000265298	237.309	196.602	265.671	49.2331	54.4113	62.053	233.194	55.2325	2.07609	2.93161e-24	5.29244e-23	AC132812.1	17	64750420	64751311	+	892	unprocessed_pseudogene	U5 small nuclear ribonucleoprotein 200 kDa helicase pseudogene [Source:NCBI gene;Acc:101929240]	-
ENSG00000175906	1133.43	1330.14	1053.94	582.592	544.113	551.386	1172.5	559.363	1.06827	2.95488e-24	5.32981e-23	ARL4D	17	43398959	43401137	+	1612	protein_coding	ADP ribosylation factor like GTPase 4D [Source:HGNC Symbol;Acc:HGNC:656]	-
ENSG00000051825	126.565	129.02	130.102	328.221	458.744	421.074	128.562	402.679	-1.64684	3.31575e-24	5.96519e-23	MPHOSPH9	12	123152320	123244014	-	10304	protein_coding	M-phase phosphoprotein 9 [Source:HGNC Symbol;Acc:HGNC:7215]	-
ENSG00000103995	87.0133	102.397	110.423	298.134	325.53	330.654	99.9444	318.106	-1.66904	3.57995e-24	6.43493e-23	CEP152	15	48712928	48811146	-	8168	protein_coding	centrosomal protein 152 [Source:HGNC Symbol;Acc:HGNC:29298]	-
ENSG00000080546	509.649	581.615	519.316	222.461	234.531	221.618	536.86	226.203	1.24788	5.02336e-24	8.99056e-23	SESN1	6	108986437	109094819	-	5121	protein_coding	sestrin 1 [Source:HGNC Symbol;Acc:HGNC:21595]	-
ENSG00000137404	110.744	109.565	113.703	387.483	309.582	335.086	111.337	344.05	-1.62805	5.18103e-24	9.26477e-23	NRM	6	30688047	30691420	-	2045	protein_coding	nurim [Source:HGNC Symbol;Acc:HGNC:8003]	-
ENSG00000163218	162.726	121.852	154.155	20.0579	12.1956	24.8212	146.244	19.0249	2.93583	5.66458e-24	1.01121e-22	PGLYRP4	1	153330120	153348840	-	2272	protein_coding	peptidoglycan recognition protein 4 [Source:HGNC Symbol;Acc:HGNC:30015]	-
ENSG00000183876	369.524	388.084	336.735	127.641	121.956	138.29	364.781	129.296	1.49606	7.45316e-24	1.32254e-22	ARSI	5	150296343	150339307	-	3269	protein_coding	arylsulfatase family member I [Source:HGNC Symbol;Acc:HGNC:32521]	-
ENSG00000213551	296.071	277.496	254.738	643.677	639.802	592.163	276.102	625.214	-1.17933	8.22404e-24	1.45808e-22	DNAJC9	10	73183362	73248862	-	3955	protein_coding	DnaJ heat shock protein family (Hsp40) member C9 [Source:HGNC Symbol;Acc:HGNC:19123]	-
ENSG00000149150	41.8116	30.7191	40.4519	180.521	175.43	210.98	37.6609	188.977	-2.33183	8.85511e-24	1.56863e-22	SLC43A1	11	57484534	57515786	-	3532	protein_coding	solute carrier family 43 member 1 [Source:HGNC Symbol;Acc:HGNC:9225]	-
ENSG00000166813	247.479	261.112	237.245	573.475	582.576	547.84	248.612	567.963	-1.19113	1.00703e-23	1.78238e-22	KIF7	15	89608789	89655451	-	5001	protein_coding	kinesin family member 7 [Source:HGNC Symbol;Acc:HGNC:30497]	-
ENSG00000198331	53.112	39.9348	49.1983	204.226	210.14	201.229	47.415	205.199	-2.1173	1.21006e-23	2.13265e-22	HYLS1	11	125883614	125900648	+	2999	protein_coding	HYLS1, centriolar and ciliogenesis associated [Source:HGNC Symbol;Acc:HGNC:26558]	-
ENSG00000149043	131.085	107.517	138.849	18.2345	10.3194	13.2971	125.817	13.9503	3.17004	1.29229e-23	2.27564e-22	SYT8	11	1828307	1837521	+	4704	protein_coding	synaptotagmin 8 [Source:HGNC Symbol;Acc:HGNC:19264]	-
ENSG00000104356	271.21	262.136	239.432	595.356	563.814	593.936	257.593	584.369	-1.18202	1.36376e-23	2.39743e-22	POP1	8	98117297	98159834	+	4852	protein_coding	POP1 homolog, ribonuclease P/MRP subunit [Source:HGNC Symbol;Acc:HGNC:30129]	-
ENSG00000124098	893.864	816.104	813.412	427.599	371.498	414.869	841.126	404.655	1.05491	1.40986e-23	2.47428e-22	FAM210B	20	56358915	56368663	+	3577	protein_coding	family with sequence similarity 210 member B [Source:HGNC Symbol;Acc:HGNC:16102]	-
ENSG00000277196	123.175	122.876	119.169	10.029	18.7625	11.5241	121.74	13.4385	3.18426	1.44701e-23	2.53519e-22	AC007325.2	KI270734.1	138082	161852	-	2405	protein_coding	proline dehydrogenase 1, mitochondrial [Source:NCBI gene;Acc:102724788]	-
ENSG00000127418	140.125	120.828	186.954	444.921	423.095	454.76	149.302	440.925	-1.56422	1.489e-23	2.60657e-22	FGFRL1	4	1009936	1026897	+	4145	protein_coding	fibroblast growth factor receptor like 1 [Source:HGNC Symbol;Acc:HGNC:3693]	-
ENSG00000144821	30.5111	18.4315	22.9592	147.699	164.172	150.7	23.9673	154.191	-2.6927	1.61775e-23	2.82956e-22	MYH15	3	108380369	108529322	-	7694	protein_coding	myosin heavy chain 15 [Source:HGNC Symbol;Acc:HGNC:31073]	-
ENSG00000139428	340.143	306.167	375	818.728	723.295	729.566	340.437	757.197	-1.15424	1.68451e-23	2.94386e-22	MMAB	12	109553737	109573874	-	6290	protein_coding	methylmalonic aciduria (cobalamin deficiency) cblB type [Source:HGNC Symbol;Acc:HGNC:19331]	-
ENSG00000142765	1348.14	1387.48	1235.42	741.232	595.71	618.757	1323.68	651.9	1.02188	1.77929e-23	3.10427e-22	SYTL1	1	27342020	27353937	+	5584	protein_coding	synaptotagmin like 1 [Source:HGNC Symbol;Acc:HGNC:15584]	-
ENSG00000188508	97.1837	124.924	99.4899	1.82345	4.69063	7.97825	107.199	4.83078	4.46566	1.86623e-23	3.25049e-22	KRTDAP	19	35487324	35495558	-	661	protein_coding	keratinocyte differentiation associated protein [Source:HGNC Symbol;Acc:HGNC:16313]	-
ENSG00000173334	636.214	643.053	688.776	317.28	285.19	306.719	656.014	303.063	1.11378	2.11318e-23	3.67753e-22	TRIB1	8	125430321	125438405	+	4138	protein_coding	tribbles pseudokinase 1 [Source:HGNC Symbol;Acc:HGNC:16891]	-
ENSG00000173432	1145.86	1632.21	1025.51	516.036	465.31	467.171	1267.86	482.839	1.39343	2.49615e-23	4.3259e-22	SAA1	11	18266174	18269977	+	796	protein_coding	serum amyloid A1 [Source:HGNC Symbol;Acc:HGNC:10513]	-
ENSG00000167775	368.394	372.725	341.108	916.283	752.377	749.069	360.742	805.91	-1.15945	2.72422e-23	4.71329e-22	CD320	19	8302127	8308356	-	2277	protein_coding	CD320 molecule [Source:HGNC Symbol;Acc:HGNC:16692]	-
ENSG00000160325	311.892	316.407	264.578	98.4662	97.5651	83.3284	297.625	93.1199	1.67744	3.29662e-23	5.69414e-22	CACFD1	9	133459965	133470848	+	3520	protein_coding	calcium channel flower domain containing 1 [Source:HGNC Symbol;Acc:HGNC:1365]	-
ENSG00000076242	476.878	411.636	494.17	940.9	977.527	905.088	460.894	941.172	-1.03096	3.47941e-23	6.00487e-22	MLH1	3	36993332	37050918	+	3532	protein_coding	mutL homolog 1 [Source:HGNC Symbol;Acc:HGNC:7127]	-
ENSG00000177426	1205.76	1265.63	1040.82	609.032	578.824	518.586	1170.73	568.814	1.0419	4.00305e-23	6.89712e-22	TGIF1	18	3411608	3459978	+	8222	protein_coding	TGFB induced factor homeobox 1 [Source:HGNC Symbol;Acc:HGNC:11776]	Homeobox
ENSG00000147697	675.765	652.269	640.671	329.133	293.633	296.082	656.235	306.283	1.09918	5.49816e-23	9.42627e-22	GSDMC	8	129748196	129786888	-	2934	protein_coding	gasdermin C [Source:HGNC Symbol;Acc:HGNC:7151]	-
ENSG00000100302	161.596	129.02	157.435	14.5876	20.6388	30.14	149.35	21.7888	2.7727	5.65516e-23	9.68744e-22	RASD2	22	35540868	35554001	+	3412	protein_coding	RASD family member 2 [Source:HGNC Symbol;Acc:HGNC:18229]	-
ENSG00000140848	226.009	192.506	237.245	566.181	498.145	531.883	218.587	532.07	-1.28508	5.66935e-23	9.70374e-22	CPNE2	16	57092537	57148367	+	7781	protein_coding	copine 2 [Source:HGNC Symbol;Acc:HGNC:2315]	-
ENSG00000129484	388.735	347.126	365.161	737.585	746.748	796.938	367.007	760.424	-1.052	5.73751e-23	9.80426e-22	PARP2	14	20343582	20357905	+	4096	protein_coding	poly(ADP-ribose) polymerase 2 [Source:HGNC Symbol;Acc:HGNC:272]	-
ENSG00000185187	61.0223	69.6299	47.0117	250.724	239.222	214.526	59.2213	234.824	-1.98462	7.96331e-23	1.35298e-21	SIGIRR	11	405716	417455	-	3496	protein_coding	single Ig and TIR domain containing [Source:HGNC Symbol;Acc:HGNC:30575]	-
ENSG00000228526	218.098	236.537	188.047	51.0566	51.5969	58.5071	214.227	53.7202	1.9954	8.15097e-23	1.38373e-21	MIR34AHG	1	9148011	9198906	-	8702	lincRNA	MIR34A host gene [Source:HGNC Symbol;Acc:HGNC:51913]	-
ENSG00000109323	855.442	757.737	780.613	368.337	397.765	399.799	797.931	388.634	1.03734	8.18972e-23	1.38918e-21	MANBA	4	102630770	102760994	-	11743	protein_coding	mannosidase beta [Source:HGNC Symbol;Acc:HGNC:6831]	-
ENSG00000132967	145.775	132.092	146.502	380.189	373.374	372.318	141.456	375.294	-1.40878	9.00793e-23	1.52672e-21	HMGB1P5	3	22381819	22382929	+	1111	transcribed_processed_pseudogene	high mobility group box 1 pseudogene 5 [Source:HGNC Symbol;Acc:HGNC:4997]	-
ENSG00000169169	102.834	65.534	67.7843	324.574	272.995	275.693	78.7174	291.087	-1.89109	9.24711e-23	1.56598e-21	CPT1C	19	49690898	49713731	+	5864	protein_coding	carnitine palmitoyltransferase 1C [Source:HGNC Symbol;Acc:HGNC:18540]	-
ENSG00000073737	172.897	154.619	142.128	0.911724	1.87625	1.77294	156.548	1.52031	6.68657	9.28825e-23	1.57167e-21	DHRS9	2	169064789	169096167	+	3750	protein_coding	dehydrogenase/reductase 9 [Source:HGNC Symbol;Acc:HGNC:16888]	-
ENSG00000136717	284.771	318.455	283.164	716.615	629.482	629.395	295.463	658.498	-1.15521	9.36088e-23	1.58267e-21	BIN1	2	127048027	127107355	-	6929	protein_coding	bridging integrator 1 [Source:HGNC Symbol;Acc:HGNC:1052]	-
ENSG00000104611	97.1837	78.8456	94.0234	321.839	266.428	291.649	90.0176	293.305	-1.70671	1.0482e-22	1.7679e-21	SH2D4A	8	19313617	19396218	+	4148	protein_coding	SH2 domain containing 4A [Source:HGNC Symbol;Acc:HGNC:26102]	-
ENSG00000232810	45.2017	54.2704	55.7581	201.491	208.264	217.186	51.7434	208.98	-2.01212	1.05759e-22	1.7823e-21	TNF	6	31575567	31578336	+	1676	protein_coding	tumor necrosis factor [Source:HGNC Symbol;Acc:HGNC:11892]	-
ENSG00000077585	502.869	462.834	469.024	193.286	185.749	216.299	478.242	198.445	1.2679	1.10178e-22	1.85525e-21	GPR137B	1	236142505	236221865	+	2309	protein_coding	G protein-coupled receptor 137B [Source:HGNC Symbol;Acc:HGNC:11862]	-
ENSG00000060656	1296.16	1053.66	1276.97	614.502	606.029	525.678	1208.93	582.07	1.05423	1.36284e-22	2.28929e-21	PTPRU	1	29236516	29326813	+	6682	protein_coding	protein tyrosine phosphatase, receptor type U [Source:HGNC Symbol;Acc:HGNC:9683]	-
ENSG00000099725	822.671	872.422	926.022	391.13	439.981	453.874	873.705	428.328	1.02847	1.42963e-22	2.39954e-21	PRKY	Y	7273972	7381548	+	7674	transcribed_unprocessed_pseudogene	protein kinase Y-linked (pseudogene) [Source:HGNC Symbol;Acc:HGNC:9444]	-
ENSG00000240065	318.672	403.444	320.336	805.964	760.82	743.75	347.484	770.178	-1.1464	1.67722e-22	2.81056e-21	PSMB9	6	32844136	32859585	+	3072	protein_coding	proteasome subunit beta 9 [Source:HGNC Symbol;Acc:HGNC:9546]	-
ENSG00000144810	367.264	332.79	399.053	732.115	842.437	779.209	366.369	784.587	-1.09933	1.70959e-22	2.8625e-21	COL8A1	3	99638475	99799226	+	9408	protein_coding	collagen type VIII alpha 1 chain [Source:HGNC Symbol;Acc:HGNC:2215]	-
ENSG00000153904	158.206	154.619	156.341	392.953	399.642	397.139	156.389	396.578	-1.34268	1.73714e-22	2.90629e-21	DDAH1	1	85318481	85578363	-	4568	protein_coding	dimethylarginine dimethylaminohydrolase 1 [Source:HGNC Symbol;Acc:HGNC:2715]	-
ENSG00000171159	1438.54	1603.54	1226.68	724.821	539.422	637.373	1422.92	633.872	1.16659	1.8539e-22	3.09913e-21	C9orf16	9	128160260	128163928	+	1662	protein_coding	chromosome 9 open reading frame 16 [Source:HGNC Symbol;Acc:HGNC:17823]	-
ENSG00000118402	642.994	626.669	526.969	262.577	252.356	267.715	598.877	260.882	1.19867	2.05785e-22	3.43178e-21	ELOVL4	6	79914812	79947580	-	3042	protein_coding	ELOVL fatty acid elongase 4 [Source:HGNC Symbol;Acc:HGNC:14415]	-
ENSG00000020922	354.833	344.054	337.828	712.057	691.399	711.837	345.572	705.097	-1.02911	2.30286e-22	3.83423e-21	MRE11	11	94415578	94493908	-	7689	protein_coding	MRE11 homolog, double strand break repair nuclease [Source:HGNC Symbol;Acc:HGNC:7230]	-
ENSG00000227300	145.775	142.332	147.595	22.7931	29.0819	26.5942	145.234	26.1564	2.47374	2.30713e-22	3.83826e-21	KRT16P2	17	16829999	16832830	-	1500	transcribed_unprocessed_pseudogene	keratin 16 pseudogene 2 [Source:HGNC Symbol;Acc:HGNC:37807]	-
ENSG00000257084	143.515	249.849	135.569	20.9697	15.01	31.0265	176.311	22.3354	2.97799	2.48265e-22	4.12037e-21	MIR200CHG	12	6963246	6964447	+	350	lincRNA	MIR200C and MIR141 host gene [Source:HGNC Symbol;Acc:HGNC:53161]	-
ENSG00000063180	318.672	333.814	291.91	114.877	106.946	106.377	314.799	109.4	1.52522	2.62137e-22	4.34712e-21	CA11	19	48637942	48646312	-	2075	protein_coding	carbonic anhydrase 11 [Source:HGNC Symbol;Acc:HGNC:1370]	-
ENSG00000285108	170.636	178.171	183.674	41.9393	41.2775	39.8912	177.494	41.036	2.11322	2.6575e-22	4.40002e-21	AC103718.1	8	129685401	129723023	-	10728	lincRNA	novel transcript	-
ENSG00000169435	332.233	376.821	325.802	91.1724	133.214	114.355	344.952	112.914	1.61263	2.7514e-22	4.54823e-21	RASSF6	4	73571550	73620631	-	6632	protein_coding	Ras association domain family member 6 [Source:HGNC Symbol;Acc:HGNC:20796]	-
ENSG00000187790	110.744	117.756	101.677	296.31	327.406	352.816	110.059	325.511	-1.56369	3.09647e-22	5.11052e-21	FANCM	14	45135940	45200890	+	8468	protein_coding	FA complementation group M [Source:HGNC Symbol;Acc:HGNC:23168]	-
ENSG00000105499	292.681	258.04	286.444	81.1435	98.5032	86.8742	279.055	88.8403	1.65134	3.1221e-22	5.14874e-21	PLA2G4C	19	48047843	48110817	-	6613	protein_coding	phospholipase A2 group IVC [Source:HGNC Symbol;Acc:HGNC:9037]	-
ENSG00000134215	343.533	293.879	357.508	125.818	89.122	104.604	331.64	106.515	1.63708	3.74606e-22	6.15818e-21	VAV3	1	107571160	107965144	-	7271	protein_coding	vav guanine nucleotide exchange factor 3 [Source:HGNC Symbol;Acc:HGNC:12659]	-
ENSG00000102312	849.792	756.713	842.931	429.422	384.632	386.502	816.479	400.185	1.02822	3.75022e-22	6.16015e-21	PORCN	X	48508962	48520814	+	3011	protein_coding	porcupine O-acyltransferase [Source:HGNC Symbol;Acc:HGNC:17652]	-
ENSG00000137449	736.788	821.224	702.989	286.281	373.374	342.178	753.667	333.945	1.17508	4.2198e-22	6.92055e-21	CPEB2	4	15002674	15070153	+	7177	protein_coding	cytoplasmic polyadenylation element binding protein 2 [Source:HGNC Symbol;Acc:HGNC:21745]	-
ENSG00000161996	272.34	275.448	347.668	799.582	663.255	666.627	298.485	709.821	-1.25008	4.60802e-22	7.54531e-21	WDR90	16	649311	667833	+	10534	protein_coding	WD repeat domain 90 [Source:HGNC Symbol;Acc:HGNC:26960]	-
ENSG00000152377	126.565	95.2292	123.542	11.8524	14.0719	13.2971	115.112	13.0738	3.13739	5.00265e-22	8.17861e-21	SPOCK1	5	136975298	137598379	-	6222	protein_coding	SPARC (osteonectin), cwcv and kazal like domains proteoglycan 1 [Source:HGNC Symbol;Acc:HGNC:11251]	-
ENSG00000137648	204.538	174.075	162.901	40.1159	45.03	33.6859	180.505	39.6106	2.18936	5.69204e-22	9.29833e-21	TMPRSS4	11	118077012	118121890	+	9948	protein_coding	transmembrane serine protease 4 [Source:HGNC Symbol;Acc:HGNC:11878]	-
ENSG00000105270	422.636	323.574	450.438	149.523	127.585	130.311	398.883	135.806	1.55321	5.83936e-22	9.5315e-21	CLIP3	19	36014660	36033343	-	3772	protein_coding	CAP-Gly domain containing linker protein 3 [Source:HGNC Symbol;Acc:HGNC:24314]	-
ENSG00000186806	219.228	199.674	240.525	63.8207	50.6588	61.1666	219.809	58.5487	1.9068	5.85377e-22	9.54753e-21	VSIG10L	19	51331536	51342124	-	3771	protein_coding	V-set and immunoglobulin domain containing 10 like [Source:HGNC Symbol;Acc:HGNC:27111]	-
ENSG00000133135	284.771	281.592	231.779	76.5848	89.122	76.2366	266.047	80.6478	1.72304	7.62841e-22	1.2403e-20	RNF128	X	106693794	106796993	+	3432	protein_coding	ring finger protein 128, E3 ubiquitin protein ligase [Source:HGNC Symbol;Acc:HGNC:21153]	-
ENSG00000138346	106.224	135.164	112.609	350.102	323.653	336.859	117.999	336.872	-1.51085	8.36247e-22	1.35647e-20	DNA2	10	68414064	68472121	-	4867	protein_coding	DNA replication helicase/nuclease 2 [Source:HGNC Symbol;Acc:HGNC:2939]	-
ENSG00000127585	153.686	133.116	160.714	29.1752	24.3913	30.14	149.172	27.9022	2.41612	9.84048e-22	1.59125e-20	FBXL16	16	692498	705829	-	3989	protein_coding	F-box and leucine rich repeat protein 16 [Source:HGNC Symbol;Acc:HGNC:14150]	-
ENSG00000158715	44.0717	51.1985	48.105	220.637	187.625	186.159	47.7917	198.141	-2.04981	1.10167e-21	1.77868e-20	SLC45A3	1	205657851	205680459	-	3702	protein_coding	solute carrier family 45 member 3 [Source:HGNC Symbol;Acc:HGNC:8642]	-
ENSG00000265415	19.2107	25.5992	30.6123	134.023	172.615	148.927	25.1407	151.855	-2.59163	1.11742e-21	1.80271e-20	AC099850.3	17	59202677	59203829	-	321	antisense	novel transcript, antisense to PRR11	-
ENSG00000245848	127.695	116.733	98.3966	17.3228	6.56688	4.43236	114.275	9.44067	3.59929	1.12263e-21	1.8097e-20	CEBPA	19	33299934	33302564	-	2631	protein_coding	CCAAT enhancer binding protein alpha [Source:HGNC Symbol;Acc:HGNC:1833]	C/EBP
ENSG00000197363	290.421	253.944	286.444	86.6138	96.627	89.5337	276.936	90.9248	1.60651	1.38322e-21	2.21945e-20	ZNF517	8	144798876	144811169	+	5308	protein_coding	zinc finger protein 517 [Source:HGNC Symbol;Acc:HGNC:27984]	zf-C2H2
ENSG00000067798	221.488	167.931	280.977	631.825	564.752	632.054	223.465	609.544	-1.44984	1.59316e-21	2.55237e-20	NAV3	12	77324641	78213008	+	13265	protein_coding	neuron navigator 3 [Source:HGNC Symbol;Acc:HGNC:15998]	-
ENSG00000163517	698.366	707.563	699.709	370.16	324.592	296.082	701.88	330.278	1.08792	1.65067e-21	2.64208e-20	HDAC11	3	13479724	13506424	+	5281	protein_coding	histone deacetylase 11 [Source:HGNC Symbol;Acc:HGNC:19086]	-
ENSG00000168490	88.1433	115.709	111.516	13.6759	6.56688	5.31883	105.123	8.52053	3.62742	1.66973e-21	2.66888e-20	PHYHIP	8	22219704	22232341	-	4170	protein_coding	phytanoyl-CoA 2-hydroxylase interacting protein [Source:HGNC Symbol;Acc:HGNC:16865]	-
ENSG00000104998	273.47	178.171	293.003	669.206	622.916	733.112	248.215	675.078	-1.44618	1.72354e-21	2.75276e-20	IL27RA	19	14031748	14053216	+	2962	protein_coding	interleukin 27 receptor subunit alpha [Source:HGNC Symbol;Acc:HGNC:17290]	-
ENSG00000175183	142.385	175.099	141.035	479.567	363.993	436.144	152.84	426.568	-1.47908	1.87067e-21	2.98317e-20	CSRP2	12	76858715	76879060	-	5873	protein_coding	cysteine and glycine rich protein 2 [Source:HGNC Symbol;Acc:HGNC:2470]	-
ENSG00000203786	105.094	84.9895	147.595	8.20552	11.2575	10.6377	112.559	10.0336	3.48723	1.91145e-21	3.04586e-20	KPRP	1	152759561	152762052	+	2492	protein_coding	keratinocyte proline rich protein [Source:HGNC Symbol;Acc:HGNC:31823]	-
ENSG00000163898	114.134	106.493	133.382	11.8524	18.7625	15.07	118.003	15.2283	2.95557	2.08535e-21	3.31788e-20	LIPH	3	185506262	185552613	-	4122	protein_coding	lipase H [Source:HGNC Symbol;Acc:HGNC:18483]	-
ENSG00000171792	327.712	290.807	301.75	672.853	615.411	652.443	306.756	646.902	-1.07752	2.09733e-21	3.33439e-20	RHNO1	12	2876258	2889523	+	2643	protein_coding	RAD9-HUS1-RAD1 interacting nuclear orphan 1 [Source:HGNC Symbol;Acc:HGNC:28206]	-
ENSG00000145908	106.224	122.876	89.6503	299.046	334.911	317.357	106.25	317.104	-1.57524	2.62098e-21	4.15418e-20	ZNF300	5	150894392	150904983	-	4411	protein_coding	zinc finger protein 300 [Source:HGNC Symbol;Acc:HGNC:13091]	zf-C2H2
ENSG00000152284	436.196	382.965	516.036	993.78	896.848	944.093	445.066	944.907	-1.08719	3.12202e-21	4.94077e-20	TCF7L1	2	85133410	85310388	+	4414	protein_coding	transcription factor 7 like 1 [Source:HGNC Symbol;Acc:HGNC:11640]	HMG
ENSG00000164400	28.2511	31.7431	19.6793	163.199	146.348	140.949	26.5578	150.165	-2.49616	4.13801e-21	6.51886e-20	CSF2	5	132073790	132076170	+	787	protein_coding	colony stimulating factor 2 [Source:HGNC Symbol;Acc:HGNC:2434]	-
ENSG00000198682	141.255	143.356	149.782	383.836	361.178	361.681	144.798	368.898	-1.34916	4.26222e-21	6.70436e-20	PAPSS2	10	87659613	87747705	+	4083	protein_coding	3'-phosphoadenosine 5'-phosphosulfate synthase 2 [Source:HGNC Symbol;Acc:HGNC:8604]	-
ENSG00000181634	94.9236	70.6539	120.263	303.604	373.374	300.514	95.28	325.831	-1.77654	4.34886e-21	6.83548e-20	TNFSF15	9	114784635	114806126	-	7889	protein_coding	TNF superfamily member 15 [Source:HGNC Symbol;Acc:HGNC:11931]	-
ENSG00000188610	16.9506	19.4554	17.4927	111.23	170.739	124.993	17.9663	135.654	-2.91362	4.50111e-21	7.06943e-20	FAM72B	1	121167646	121185539	-	3033	protein_coding	family with sequence similarity 72 member B [Source:HGNC Symbol;Acc:HGNC:24805]	-
ENSG00000284526	144.645	132.092	150.875	26.44	28.1438	27.4806	142.537	27.3548	2.38109	4.57688e-21	7.18301e-20	AC015802.6	17	76563710	76570544	-	5654	protein_coding	novel protein	-
ENSG00000103269	263.3	293.879	239.432	93.9076	55.3494	69.1448	265.537	72.8006	1.86646	5.5842e-21	8.7441e-20	RHBDL1	16	675666	678268	+	1884	protein_coding	rhomboid like 1 [Source:HGNC Symbol;Acc:HGNC:10007]	-
ENSG00000023902	100.574	89.0853	96.21	311.81	273.933	271.26	95.2897	285.668	-1.58527	6.79615e-21	1.05939e-19	PLEKHO1	1	150149183	150164720	+	6565	protein_coding	pleckstrin homology domain containing O1 [Source:HGNC Symbol;Acc:HGNC:24310]	-
ENSG00000138134	21.4708	46.0786	40.4519	170.492	181.058	190.591	36.0005	180.714	-2.31972	7.59381e-21	1.18108e-19	STAMBPL1	10	88879734	88975153	+	6323	protein_coding	STAM binding protein like 1 [Source:HGNC Symbol;Acc:HGNC:24105]	-
ENSG00000187951	58.7622	55.2944	41.5452	194.197	204.511	209.207	51.8673	202.639	-1.96609	7.71916e-21	1.19967e-19	AC091057.1	15	30658717	30772993	+	5637	processed_transcript	OTU deubiquitinase 7A pseudogene [Source:NCBI gene;Acc:100288637]	-
ENSG00000124343	767.299	804.84	778.427	419.393	318.963	374.091	783.522	370.816	1.07895	8.01668e-21	1.24498e-19	XG	X	2752048	2816500	+	3349	protein_coding	Xg glycoprotein (Xg blood group) [Source:HGNC Symbol;Acc:HGNC:12806]	-
ENSG00000170485	396.645	329.718	416.546	144.052	133.214	151.587	380.97	142.951	1.4126	8.25955e-21	1.28078e-19	NPAS2	2	100820152	100996829	+	12491	protein_coding	neuronal PAS domain protein 2 [Source:HGNC Symbol;Acc:HGNC:7895]	bHLH
ENSG00000233901	624.914	581.615	618.805	299.957	287.067	296.082	608.445	294.368	1.04698	8.56025e-21	1.32642e-19	LINC01503	9	129332300	129359538	+	1594	lincRNA	long intergenic non-protein coding RNA 1503 [Source:HGNC Symbol;Acc:HGNC:51184]	-
ENSG00000136274	153.686	123.9	169.461	421.217	384.632	381.183	149.016	395.677	-1.41107	8.67972e-21	1.34393e-19	NACAD	7	45080438	45088914	-	4917	protein_coding	NAC alpha domain containing [Source:HGNC Symbol;Acc:HGNC:22196]	-
ENSG00000225383	45.2017	61.4382	44.8251	202.403	188.563	213.64	50.4883	201.535	-1.99292	8.80749e-21	1.3627e-19	SFTA1P	10	10784437	10794980	-	824	lincRNA	surfactant associated 1, pseudogene [Source:HGNC Symbol;Acc:HGNC:18383]	-
ENSG00000115009	227.139	471.026	229.592	59.2621	54.4113	67.3719	309.252	60.3484	2.35833	8.96228e-21	1.38562e-19	CCL20	2	227805739	227817564	+	1594	protein_coding	C-C motif chemokine ligand 20 [Source:HGNC Symbol;Acc:HGNC:10619]	-
ENSG00000198056	28.2511	35.8389	29.519	139.494	170.739	163.997	31.203	158.077	-2.33716	9.896e-21	1.52544e-19	PRIM1	12	56731596	56752373	-	2437	protein_coding	DNA primase subunit 1 [Source:HGNC Symbol;Acc:HGNC:9369]	-
ENSG00000104450	168.376	137.212	155.248	373.807	388.384	399.799	153.612	387.33	-1.33635	1.38657e-20	2.12632e-19	SPAG1	8	100157906	100259278	+	5055	protein_coding	sperm associated antigen 1 [Source:HGNC Symbol;Acc:HGNC:11212]	-
ENSG00000168005	362.744	309.239	294.097	714.792	667.946	662.195	322.026	681.644	-1.08284	1.42554e-20	2.18285e-19	SPINDOC	11	63813388	63827718	+	2807	protein_coding	spindlin interactor and repressor of chromatin binding [Source:HGNC Symbol;Acc:HGNC:25115]	-
ENSG00000197903	239.569	231.417	261.298	84.7904	74.1119	70.0313	244.095	76.3112	1.67749	1.44903e-20	2.21719e-19	HIST1H2BK	6	27146418	27146798	-	381	protein_coding	histone cluster 1 H2B family member k [Source:HGNC Symbol;Acc:HGNC:13954]	-
ENSG00000110583	267.82	202.746	307.216	616.326	609.782	682.583	259.261	636.23	-1.29731	1.53723e-20	2.34868e-19	NAA40	11	63938959	63957328	+	5321	protein_coding	N(alpha)-acetyltransferase 40, NatD catalytic subunit [Source:HGNC Symbol;Acc:HGNC:25845]	-
ENSG00000204387	844.142	1175.52	846.211	422.128	424.033	408.664	955.29	418.275	1.19247	1.60368e-20	2.44661e-19	C6orf48	6	31834608	31839766	+	1801	protein_coding	chromosome 6 open reading frame 48 [Source:HGNC Symbol;Acc:HGNC:19078]	-
ENSG00000122733	318.672	265.208	340.015	108.495	106.008	105.49	307.965	106.665	1.52871	1.8301e-20	2.78639e-19	PHF24	9	34957608	34982544	+	5813	protein_coding	PHD finger protein 24 [Source:HGNC Symbol;Acc:HGNC:29180]	-
ENSG00000145358	5.65021	4.09588	4.37318	111.23	87.2457	101.944	4.70642	100.14	-4.41772	1.83042e-20	2.78639e-19	DDIT4L	4	100185870	100190782	-	2994	protein_coding	DNA damage inducible transcript 4 like [Source:HGNC Symbol;Acc:HGNC:30555]	-
ENSG00000162772	298.331	428.019	313.776	109.407	110.699	121.447	346.709	113.851	1.6077	1.87451e-20	2.85142e-19	ATF3	1	212565334	212620777	+	4040	protein_coding	activating transcription factor 3 [Source:HGNC Symbol;Acc:HGNC:785]	TF_bZIP
ENSG00000108342	21.4708	18.4315	14.2128	161.375	114.451	117.901	18.0384	131.242	-2.86462	1.88054e-20	2.8585e-19	CSF3	17	40015361	40017813	+	2220	protein_coding	colony stimulating factor 3 [Source:HGNC Symbol;Acc:HGNC:2438]	-
ENSG00000117016	619.263	494.577	558.674	215.167	265.49	230.483	557.505	237.046	1.23351	2.01184e-20	3.05362e-19	RIMS3	1	40620679	40665657	-	7235	protein_coding	regulating synaptic membrane exocytosis 3 [Source:HGNC Symbol;Acc:HGNC:21292]	-
ENSG00000148835	98.3137	114.685	100.583	310.898	286.128	294.309	104.527	297.112	-1.50538	2.24442e-20	3.40166e-19	TAF5	10	103367967	103389065	+	3268	protein_coding	TATA-box binding protein associated factor 5 [Source:HGNC Symbol;Acc:HGNC:11539]	-
ENSG00000152766	88.1433	125.948	79.8106	2.73517	2.81438	2.65942	97.9674	2.73632	5.16447	2.29443e-20	3.4724e-19	ANKRD22	10	88822132	88851818	-	1733	protein_coding	ankyrin repeat domain 22 [Source:HGNC Symbol;Acc:HGNC:28321]	-
ENSG00000172731	127.695	103.421	129.009	353.749	362.117	300.514	120.042	338.793	-1.49864	2.31189e-20	3.49628e-19	LRRC20	10	70298970	70382650	-	3625	protein_coding	leucine rich repeat containing 20 [Source:HGNC Symbol;Acc:HGNC:23421]	-
ENSG00000189433	468.968	441.331	455.904	217.902	182.935	167.543	455.401	189.46	1.26532	2.52904e-20	3.81633e-19	GJB4	1	34759741	34763724	+	2840	protein_coding	gap junction protein beta 4 [Source:HGNC Symbol;Acc:HGNC:4286]	-
ENSG00000181544	10.1704	22.5273	13.1195	107.583	121.956	146.268	15.2724	125.269	-3.0234	2.81919e-20	4.248e-19	FANCB	X	14835961	14873069	-	3593	protein_coding	FA complementation group B [Source:HGNC Symbol;Acc:HGNC:3583]	-
ENSG00000184207	411.335	447.475	428.572	976.457	827.427	804.916	429.127	869.6	-1.01837	2.84031e-20	4.27673e-19	PGP	16	2211997	2214807	-	2727	protein_coding	phosphoglycolate phosphatase [Source:HGNC Symbol;Acc:HGNC:8909]	-
ENSG00000166788	160.466	178.171	162.901	402.07	433.414	384.729	167.179	406.738	-1.2813	3.02891e-20	4.5574e-19	SAAL1	11	18069935	18106091	-	3070	protein_coding	serum amyloid A like 1 [Source:HGNC Symbol;Acc:HGNC:25158]	-
ENSG00000163082	129.955	136.188	110.423	13.6759	20.6388	23.9347	125.522	19.4165	2.69168	3.06114e-20	4.60256e-19	SGPP2	2	222424517	222560948	+	3336	protein_coding	sphingosine-1-phosphate phosphatase 2 [Source:HGNC Symbol;Acc:HGNC:19953]	-
ENSG00000188985	27.121	13.3116	30.6123	134.023	148.224	151.587	23.6816	144.611	-2.61993	3.06499e-20	4.60501e-19	DHFRP1	18	26170726	26171284	-	559	processed_pseudogene	dihydrofolate reductase pseudogene 1 [Source:HGNC Symbol;Acc:HGNC:2862]	-
ENSG00000095587	216.968	169.979	201.166	41.9393	44.0919	59.3936	196.038	48.475	2.0127	3.40663e-20	5.10724e-19	TLL2	10	96364606	96513918	-	8151	protein_coding	tolloid like 2 [Source:HGNC Symbol;Acc:HGNC:11844]	-
ENSG00000160323	406.815	366.581	391.4	168.669	159.481	151.587	388.265	159.912	1.27945	3.48961e-20	5.22787e-19	ADAMTS13	9	133414358	133459402	+	5708	protein_coding	ADAM metallopeptidase with thrombospondin type 1 motif 13 [Source:HGNC Symbol;Acc:HGNC:1366]	-
ENSG00000173638	218.098	171.003	193.513	579.857	492.516	429.939	194.205	500.771	-1.36814	3.51089e-20	5.25597e-19	SLC19A1	21	45493572	45544411	-	9998	protein_coding	solute carrier family 19 member 1 [Source:HGNC Symbol;Acc:HGNC:10937]	-
ENSG00000152240	224.878	224.249	195.7	495.066	471.877	484.014	214.943	483.652	-1.16985	3.57728e-20	5.3515e-19	HAUS1	18	46104332	46128333	+	2165	protein_coding	HAUS augmin like complex subunit 1 [Source:HGNC Symbol;Acc:HGNC:25174]	-
ENSG00000139354	13.5605	26.6232	26.2391	113.966	163.234	162.224	22.1409	146.475	-2.71862	3.63003e-20	5.42488e-19	GAS2L3	12	100573683	100628286	+	6799	protein_coding	growth arrest specific 2 like 3 [Source:HGNC Symbol;Acc:HGNC:27475]	-
ENSG00000152455	123.175	117.756	112.609	303.604	318.025	327.108	117.847	316.246	-1.42454	3.63155e-20	5.42488e-19	SUV39H2	10	14878820	14904315	+	3565	protein_coding	suppressor of variegation 3-9 homolog 2 [Source:HGNC Symbol;Acc:HGNC:17287]	-
ENSG00000189051	105.094	80.8936	80.9039	6.38207	4.69063	3.54589	88.9638	4.87286	4.19178	3.65986e-20	5.45931e-19	RNF222	17	8390704	8397826	-	3070	protein_coding	ring finger protein 222 [Source:HGNC Symbol;Acc:HGNC:34517]	-
ENSG00000167550	73.4528	80.8936	55.7581	270.782	233.593	226.05	70.0348	243.475	-1.79567	3.94233e-20	5.86802e-19	RHEBL1	12	49064685	49070025	-	1290	protein_coding	RHEB like 1 [Source:HGNC Symbol;Acc:HGNC:21166]	-
ENSG00000150907	505.129	478.194	478.864	216.99	227.965	226.05	487.395	223.668	1.12351	4.48977e-20	6.66378e-19	FOXO1	13	40469953	40666597	-	6232	protein_coding	forkhead box O1 [Source:HGNC Symbol;Acc:HGNC:3819]	Fork
ENSG00000109107	322.062	298.999	368.441	715.704	650.121	702.972	329.834	689.599	-1.06496	5.10184e-20	7.56143e-19	ALDOC	17	28573115	28577264	-	2928	protein_coding	aldolase, fructose-bisphosphate C [Source:HGNC Symbol;Acc:HGNC:418]	-
ENSG00000139364	119.785	114.685	116.983	15.4993	11.2575	23.0483	117.151	16.6017	2.81294	5.20243e-20	7.70501e-19	TMEM132B	12	125186836	125662377	+	15703	protein_coding	transmembrane protein 132B [Source:HGNC Symbol;Acc:HGNC:29397]	-
ENSG00000090661	201.148	244.729	208.82	61.9973	68.4832	61.1666	218.232	63.8823	1.77419	5.39304e-20	7.98163e-19	CERS4	19	8206736	8262421	+	4059	protein_coding	ceramide synthase 4 [Source:HGNC Symbol;Acc:HGNC:23747]	Homeobox
ENSG00000247903	436.196	420.851	387.027	141.317	188.563	165.77	414.692	165.217	1.32824	5.54322e-20	8.19804e-19	AC024896.1	12	26971586	26979582	+	2549	antisense	novel transcript, antisense to TM7SF3	-
ENSG00000010704	192.107	154.619	208.82	451.304	472.815	433.485	185.182	452.535	-1.29097	6.02256e-20	8.90063e-19	HFE	6	26087281	26098343	+	5675	protein_coding	homeostatic iron regulator [Source:HGNC Symbol;Acc:HGNC:4886]	-
ENSG00000183023	18.0807	5.11985	15.3061	109.407	131.338	109.923	12.8356	116.889	-3.20371	6.33127e-20	9.33693e-19	SLC8A1	2	40097270	40611053	-	21922	protein_coding	solute carrier family 8 member A1 [Source:HGNC Symbol;Acc:HGNC:11068]	-
ENSG00000176641	621.523	514.033	532.435	232.49	269.242	241.12	555.997	247.617	1.16666	6.4041e-20	9.43025e-19	RNF152	18	61808063	61894247	-	10632	protein_coding	ring finger protein 152 [Source:HGNC Symbol;Acc:HGNC:26811]	-
ENSG00000160190	190.977	167.931	217.566	441.275	470.939	455.647	192.158	455.953	-1.24794	6.59449e-20	9.69759e-19	SLC37A1	21	42496008	42581440	+	6814	protein_coding	solute carrier family 37 member 1 [Source:HGNC Symbol;Acc:HGNC:11024]	-
ENSG00000182628	429.416	565.231	446.065	1032.98	963.455	957.39	480.237	984.61	-1.03416	7.08846e-20	1.04166e-18	SKA2	17	59109951	59155269	-	3148	protein_coding	spindle and kinetochore associated complex subunit 2 [Source:HGNC Symbol;Acc:HGNC:28006]	-
ENSG00000104524	103.964	119.804	115.889	340.073	306.767	290.763	113.219	312.534	-1.46341	9.18888e-20	1.34556e-18	PYCR3	8	143603913	143609773	-	3244	protein_coding	pyrroline-5-carboxylate reductase 3 [Source:HGNC Symbol;Acc:HGNC:25846]	-
ENSG00000138604	350.313	298.999	385.933	683.793	775.83	730.453	345.082	730.025	-1.08213	9.6649e-20	1.41427e-18	GLCE	15	69160584	69272217	+	6630	protein_coding	glucuronic acid epimerase [Source:HGNC Symbol;Acc:HGNC:17855]	-
ENSG00000178031	10.1704	17.4075	34.9855	152.258	142.595	139.176	20.8544	144.676	-2.79272	1.13974e-19	1.66195e-18	ADAMTSL1	9	17906563	18910950	+	13652	protein_coding	ADAMTS like 1 [Source:HGNC Symbol;Acc:HGNC:14632]	-
ENSG00000164855	250.869	219.129	250.365	66.5559	78.8026	82.4419	240.121	75.9334	1.65992	1.18783e-19	1.73084e-18	TMEM184A	7	1542235	1560821	-	7805	protein_coding	transmembrane protein 184A [Source:HGNC Symbol;Acc:HGNC:28797]	-
ENSG00000230590	513.039	561.135	516.036	255.283	243.913	253.531	530.07	250.909	1.07935	1.34411e-19	1.95447e-18	FTX	X	73946555	74293574	-	28487	lincRNA	FTX transcript, XIST regulator [Source:HGNC Symbol;Acc:HGNC:37190]	-
ENSG00000151136	128.825	107.517	114.796	18.2345	17.8244	20.3889	117.046	18.8159	2.63501	1.34893e-19	1.9601e-18	BTBD11	12	107318413	107659642	+	7924	protein_coding	BTB domain containing 11 [Source:HGNC Symbol;Acc:HGNC:23844]	-
ENSG00000132196	262.17	284.664	238.338	551.593	606.029	540.748	261.724	566.123	-1.11189	1.69349e-19	2.45562e-18	HSD17B7	1	162790702	162812817	+	4778	protein_coding	hydroxysteroid 17-beta dehydrogenase 7 [Source:HGNC Symbol;Acc:HGNC:5215]	-
ENSG00000197905	110.744	93.1812	87.4637	298.134	271.118	273.92	97.1297	281.057	-1.53449	1.80792e-19	2.61789e-18	TEAD4	12	2959330	3040673	+	2272	protein_coding	TEA domain transcription factor 4 [Source:HGNC Symbol;Acc:HGNC:11717]	TEA
ENSG00000023041	318.672	347.126	366.254	687.44	657.626	719.815	344.017	688.294	-1.00028	1.8265e-19	2.64111e-18	ZDHHC6	10	112424428	112446917	-	3748	protein_coding	zinc finger DHHC-type containing 6 [Source:HGNC Symbol;Acc:HGNC:19160]	-
ENSG00000134285	200.018	205.818	217.566	589.886	469.063	449.441	207.8	502.797	-1.27461	1.88941e-19	2.73019e-18	FKBP11	12	48921518	48926474	-	4957	protein_coding	FK506 binding protein 11 [Source:HGNC Symbol;Acc:HGNC:18624]	-
ENSG00000104147	12.4305	11.2637	21.8659	137.67	105.07	112.582	15.1867	118.441	-2.9669	1.99604e-19	2.87826e-18	OIP5	15	41309268	41332621	-	1236	protein_coding	Opa interacting protein 5 [Source:HGNC Symbol;Acc:HGNC:20300]	-
ENSG00000108852	67.8026	62.4621	74.3441	244.342	223.274	209.207	68.2029	225.608	-1.727	2.02824e-19	2.92266e-18	MPP2	17	43875357	43909711	-	6114	protein_coding	membrane palmitoylated protein 2 [Source:HGNC Symbol;Acc:HGNC:7220]	-
ENSG00000103227	103.964	103.421	114.796	10.9407	16.8863	16.843	107.394	14.89	2.85039	2.04481e-19	2.94449e-18	LMF1	16	853634	981318	-	8233	protein_coding	lipase maturation factor 1 [Source:HGNC Symbol;Acc:HGNC:14154]	-
ENSG00000198890	220.358	182.267	224.126	517.859	479.382	452.101	208.917	483.114	-1.21103	2.0798e-19	2.99281e-18	PRMT6	1	107056679	107067636	+	4335	protein_coding	protein arginine methyltransferase 6 [Source:HGNC Symbol;Acc:HGNC:18241]	-
ENSG00000187583	400.035	339.958	356.414	149.523	152.915	140.949	365.469	147.795	1.30575	2.52968e-19	3.63012e-18	PLEKHN1	1	966497	975865	+	2833	protein_coding	pleckstrin homology domain containing N1 [Source:HGNC Symbol;Acc:HGNC:25284]	-
ENSG00000135912	387.605	318.455	409.986	767.672	736.429	775.663	372.015	759.921	-1.03204	2.65883e-19	3.80757e-18	TTLL4	2	218710845	218755416	+	7685	protein_coding	tubulin tyrosine ligase like 4 [Source:HGNC Symbol;Acc:HGNC:28976]	-
ENSG00000152137	109.614	79.8696	104.956	12.7641	4.69063	10.6377	98.1467	9.36414	3.38251	2.66737e-19	3.81716e-18	HSPB8	12	119178642	119221131	+	2860	protein_coding	heat shock protein family B (small) member 8 [Source:HGNC Symbol;Acc:HGNC:30171]	-
ENSG00000115392	138.995	119.804	135.569	350.102	325.53	332.427	131.456	336.02	-1.35561	2.70425e-19	3.86729e-18	FANCL	2	58159243	58241372	-	2412	protein_coding	FA complementation group L [Source:HGNC Symbol;Acc:HGNC:20748]	-
ENSG00000186493	237.309	288.759	266.764	101.201	78.8026	79.7825	264.278	86.5955	1.61054	2.85099e-19	4.07152e-18	C5orf38	5	2752131	2755397	+	1925	protein_coding	chromosome 5 open reading frame 38 [Source:HGNC Symbol;Acc:HGNC:24226]	-
ENSG00000174799	126.565	106.493	129.009	320.927	327.406	308.492	120.689	318.942	-1.40378	2.94439e-19	4.19914e-18	CEP135	4	55948871	56033363	+	8640	protein_coding	centrosomal protein 135 [Source:HGNC Symbol;Acc:HGNC:29086]	-
ENSG00000090339	190.977	196.602	213.193	428.51	467.187	455.647	200.257	450.448	-1.16937	3.01598e-19	4.29829e-18	ICAM1	19	10270835	10286615	+	3706	protein_coding	intercellular adhesion molecule 1 [Source:HGNC Symbol;Acc:HGNC:5344]	-
ENSG00000237517	141.255	142.332	168.368	37.3807	33.7725	30.14	150.652	33.7644	2.15824	4.19499e-19	5.96223e-18	DGCR5	22	18970514	18994628	+	5676	transcribed_unprocessed_pseudogene	DiGeorge syndrome critical region gene 5 [Source:HGNC Symbol;Acc:HGNC:16757]	-
ENSG00000105880	91.5334	64.5101	110.423	5.47035	3.7525	7.09178	88.8221	5.43821	4.02191	4.6353e-19	6.57005e-18	DLX5	7	97020392	97024950	-	1748	protein_coding	distal-less homeobox 5 [Source:HGNC Symbol;Acc:HGNC:2918]	Homeobox
ENSG00000118655	204.538	227.321	196.793	442.186	469.063	507.062	209.551	472.77	-1.17292	4.83502e-19	6.83941e-18	DCLRE1B	1	113905141	113914086	+	3940	protein_coding	DNA cross-link repair 1B [Source:HGNC Symbol;Acc:HGNC:17641]	-
ENSG00000103056	255.39	120.828	231.779	46.4979	19.7006	25.7077	202.666	30.6354	2.72317	4.83521e-19	6.83941e-18	SMPD3	16	68358325	68448688	-	7166	protein_coding	sphingomyelin phosphodiesterase 3 [Source:HGNC Symbol;Acc:HGNC:14240]	-
ENSG00000251095	310.762	396.276	274.417	74.7614	121.956	100.171	327.152	98.963	1.72694	4.88087e-19	6.89929e-18	AC097478.1	4	89551356	89726752	+	6069	antisense	novel transcript	-
ENSG00000163002	133.345	105.469	139.942	343.72	320.839	336.859	126.252	333.806	-1.40532	5.25336e-19	7.4107e-18	NUP35	2	183117513	183161680	+	4046	protein_coding	nucleoporin 35 [Source:HGNC Symbol;Acc:HGNC:29797]	-
ENSG00000182492	247.479	218.105	245.992	61.9973	88.1838	70.9178	237.192	73.6996	1.687	5.54808e-19	7.81054e-18	BGN	X	153494939	153509554	+	2453	protein_coding	biglycan [Source:HGNC Symbol;Acc:HGNC:1044]	-
ENSG00000132164	591.012	538.608	569.607	292.664	271.118	243.78	566.409	269.187	1.07321	6.63245e-19	9.31186e-18	SLC6A11	3	10816200	10940733	+	6700	protein_coding	solute carrier family 6 member 11 [Source:HGNC Symbol;Acc:HGNC:11044]	-
ENSG00000170426	120.915	71.6779	79.8106	2.73517	4.69063	0.886472	90.801	2.77076	5.04829	7.05737e-19	9.90176e-18	SDR9C7	12	56923154	56934405	-	1765	protein_coding	short chain dehydrogenase/reductase family 9C member 7 [Source:HGNC Symbol;Acc:HGNC:29958]	-
ENSG00000156398	14.6906	18.4315	8.74637	104.848	116.328	106.377	13.9561	109.184	-2.96131	8.18237e-19	1.1457e-17	SFXN2	10	102714538	102743492	+	8034	protein_coding	sideroflexin 2 [Source:HGNC Symbol;Acc:HGNC:16086]	-
ENSG00000099282	50.8519	47.1026	54.6648	190.55	193.254	173.748	50.8731	185.851	-1.87011	8.99003e-19	1.25625e-17	TSPAN15	10	69451473	69507669	+	2646	protein_coding	tetraspanin 15 [Source:HGNC Symbol;Acc:HGNC:23298]	-
ENSG00000176438	192.107	125.948	160.714	382.924	420.28	471.603	159.59	424.936	-1.41631	9.75567e-19	1.35958e-17	SYNE3	14	95407266	95475836	-	18164	protein_coding	spectrin repeat containing nuclear envelope family member 3 [Source:HGNC Symbol;Acc:HGNC:19861]	-
ENSG00000120647	77.9729	59.3902	72.1575	235.225	209.202	234.029	69.8402	226.152	-1.6986	9.80017e-19	1.36486e-17	CCDC77	12	389273	442645	+	3614	protein_coding	coiled-coil domain containing 77 [Source:HGNC Symbol;Acc:HGNC:28203]	-
ENSG00000139998	66.6725	55.2944	53.5715	196.932	193.254	216.299	58.5128	202.162	-1.79099	1.07485e-18	1.49593e-17	RAB15	14	64945814	64973226	-	5015	protein_coding	RAB15, member RAS oncogene family [Source:HGNC Symbol;Acc:HGNC:20150]	-
ENSG00000136695	84.7532	82.9415	74.3441	6.38207	3.7525	5.31883	80.6796	5.15114	3.96604	1.13185e-18	1.57316e-17	IL36RN	2	113058638	113065382	+	3299	protein_coding	interleukin 36 receptor antagonist [Source:HGNC Symbol;Acc:HGNC:15561]	-
ENSG00000137462	285.901	285.687	307.216	111.23	117.266	109.036	292.935	112.511	1.38083	1.32002e-18	1.82737e-17	TLR2	4	153684070	153705702	+	5217	protein_coding	toll like receptor 2 [Source:HGNC Symbol;Acc:HGNC:11848]	-
ENSG00000119138	560.501	528.368	559.767	222.461	261.737	282.785	549.546	255.661	1.1034	1.35775e-18	1.87584e-17	KLF9	9	70384597	70414624	-	5175	protein_coding	Kruppel like factor 9 [Source:HGNC Symbol;Acc:HGNC:1123]	zf-C2H2
ENSG00000156787	108.484	121.852	101.677	315.457	271.118	320.016	110.671	302.197	-1.44814	1.5569e-18	2.14386e-17	TBC1D31	8	123041968	123152153	+	8611	protein_coding	TBC1 domain family member 31 [Source:HGNC Symbol;Acc:HGNC:30888]	-
ENSG00000122678	277.99	219.129	290.817	584.415	557.247	571.774	262.646	571.145	-1.12272	1.88569e-18	2.58803e-17	POLM	7	44072247	44082540	-	4487	protein_coding	DNA polymerase mu [Source:HGNC Symbol;Acc:HGNC:9185]	-
ENSG00000234420	110.744	95.2292	108.236	264.4	287.067	312.925	104.737	288.13	-1.46183	2.02348e-18	2.76983e-17	ZNF37BP	10	42513510	42552822	-	10256	transcribed_processed_pseudogene	zinc finger protein 37B, pseudogene [Source:HGNC Symbol;Acc:HGNC:13103]	-
ENSG00000160326	325.452	345.078	392.493	965.516	701.718	730.453	354.341	799.229	-1.17341	2.29471e-18	3.13284e-17	SLC2A6	9	133471095	133479137	-	3540	protein_coding	solute carrier family 2 member 6 [Source:HGNC Symbol;Acc:HGNC:11011]	-
ENSG00000176659	542.42	488.433	544.461	237.96	263.613	252.644	525.105	251.406	1.06221	2.3914e-18	3.26198e-17	C20orf197	20	60055925	60072953	+	3320	lincRNA	chromosome 20 open reading frame 197 [Source:HGNC Symbol;Acc:HGNC:26601]	-
ENSG00000144395	16.9506	21.5034	18.586	125.818	107.884	116.128	19.0133	116.61	-2.61307	2.48659e-18	3.38591e-17	CCDC150	2	196639554	196763490	+	9683	protein_coding	coiled-coil domain containing 150 [Source:HGNC Symbol;Acc:HGNC:26834]	-
ENSG00000165030	409.075	440.307	461.371	206.961	189.501	198.57	436.918	198.344	1.13942	2.78329e-18	3.77261e-17	NFIL3	9	91409045	91423862	-	2085	protein_coding	nuclear factor, interleukin 3 regulated [Source:HGNC Symbol;Acc:HGNC:7787]	TF_bZIP
ENSG00000049283	1252.09	940.004	1140.31	604.473	463.434	514.154	1110.8	527.354	1.07392	3.01812e-18	4.08291e-17	EPN3	17	50532543	50543750	+	4642	protein_coding	epsin 3 [Source:HGNC Symbol;Acc:HGNC:18235]	-
ENSG00000133687	87.0133	98.3011	67.7843	8.20552	6.56688	6.2053	84.3662	6.99257	3.5942	3.3157e-18	4.47092e-17	TMTC1	12	29500840	29784759	-	14636	protein_coding	transmembrane and tetratricopeptide repeat containing 1 [Source:HGNC Symbol;Acc:HGNC:24099]	-
ENSG00000128284	23.7309	21.5034	22.9592	130.377	110.699	132.084	22.7312	124.387	-2.45402	3.72093e-18	5.00436e-17	APOL3	22	36140330	36166177	-	5901	protein_coding	apolipoprotein L3 [Source:HGNC Symbol;Acc:HGNC:14868]	-
ENSG00000134874	188.717	176.123	214.286	419.393	468.125	427.279	193.042	438.266	-1.18355	3.94678e-18	5.30466e-17	DZIP1	13	95578202	95644703	-	8470	protein_coding	DAZ interacting zinc finger protein 1 [Source:HGNC Symbol;Acc:HGNC:20908]	-
ENSG00000145819	143.515	143.356	160.714	328.221	375.25	390.048	149.195	364.506	-1.28908	4.46436e-18	5.99256e-17	ARHGAP26	5	142770377	143229011	+	17158	protein_coding	Rho GTPase activating protein 26 [Source:HGNC Symbol;Acc:HGNC:17073]	-
ENSG00000167772	210.188	168.955	201.166	63.8207	51.5969	49.6424	193.436	55.02	1.81289	5.00062e-18	6.6951e-17	ANGPTL4	19	8363289	8374373	+	2482	protein_coding	angiopoietin like 4 [Source:HGNC Symbol;Acc:HGNC:16039]	-
ENSG00000117697	140.125	155.643	142.128	365.601	322.715	387.388	145.966	358.568	-1.29599	5.00492e-18	6.69654e-17	NSL1	1	212726153	212791782	-	4091	protein_coding	NSL1, MIS12 kinetochore complex component [Source:HGNC Symbol;Acc:HGNC:24548]	-
ENSG00000086619	116.394	133.116	151.968	339.161	338.663	330.654	133.826	336.16	-1.32794	5.16595e-18	6.90755e-17	ERO1B	1	236215555	236281985	-	5361	protein_coding	endoplasmic reticulum oxidoreductase 1 beta [Source:HGNC Symbol;Acc:HGNC:14355]	-
ENSG00000181218	131.085	188.41	144.315	41.0276	30.9582	22.1618	154.603	31.3825	2.30392	5.21592e-18	6.96988e-17	HIST3H2A	1	228456979	228457873	-	895	protein_coding	histone cluster 3 H2A [Source:HGNC Symbol;Acc:HGNC:20507]	-
ENSG00000173818	457.667	584.687	427.479	194.197	210.14	214.526	489.944	206.288	1.249	5.28161e-18	7.05312e-17	ENDOV	17	80415165	80438086	+	7253	protein_coding	endonuclease V [Source:HGNC Symbol;Acc:HGNC:26640]	-
ENSG00000182165	236.179	289.783	190.233	64.7324	60.9782	80.6689	238.732	68.7932	1.79476	5.41321e-18	7.22422e-17	TP53TG1	7	87325225	87345515	-	1023	lincRNA	TP53 target 1 [Source:HGNC Symbol;Acc:HGNC:17026]	-
ENSG00000169379	149.166	186.362	161.808	364.69	473.754	401.572	165.779	413.338	-1.31581	6.16941e-18	8.21232e-17	ARL13B	3	93980139	94055668	+	4154	protein_coding	ADP ribosylation factor like GTPase 13B [Source:HGNC Symbol;Acc:HGNC:25419]	-
ENSG00000261373	74.5828	47.1026	57.9447	204.226	203.573	210.094	59.8767	205.964	-1.7875	7.07352e-18	9.38574e-17	VPS9D1-AS1	16	89711856	89718165	+	1753	antisense	VPS9D1 antisense RNA 1 [Source:HGNC Symbol;Acc:HGNC:48915]	-
ENSG00000110074	262.17	300.023	317.056	661.912	546.927	661.308	293.083	623.382	-1.08845	7.64823e-18	1.01354e-16	FOXRED1	11	126269055	126278131	+	5657	protein_coding	FAD dependent oxidoreductase domain containing 1 [Source:HGNC Symbol;Acc:HGNC:26927]	-
ENSG00000188917	132.215	138.236	145.408	322.75	334.911	345.724	138.62	334.462	-1.27052	8.66092e-18	1.14555e-16	TRMT2B	X	101009346	101052116	-	4055	protein_coding	tRNA methyltransferase 2 homolog B [Source:HGNC Symbol;Acc:HGNC:25748]	-
ENSG00000172663	666.725	855.014	608.966	350.102	288.943	303.173	710.235	314.073	1.17793	8.71265e-18	1.15165e-16	TMEM134	11	67461710	67469272	-	5892	protein_coding	transmembrane protein 134 [Source:HGNC Symbol;Acc:HGNC:26142]	-
ENSG00000134013	141.255	124.924	115.889	305.428	349.921	314.698	127.356	323.349	-1.3449	9.9694e-18	1.31443e-16	LOXL2	8	23297189	23425328	-	5707	protein_coding	lysyl oxidase like 2 [Source:HGNC Symbol;Acc:HGNC:6666]	-
ENSG00000234795	73.4528	78.8456	80.9039	5.47035	2.81438	7.97825	77.7341	5.42099	3.83243	1.16044e-17	1.5242e-16	RFTN1P1	Y	7712985	7809261	-	1842	transcribed_unprocessed_pseudogene	raftlin, lipid raft linker 1 pseudogene 1 [Source:HGNC Symbol;Acc:HGNC:23971]	-
ENSG00000163935	125.435	135.164	115.889	295.399	329.282	322.676	125.496	315.786	-1.33021	1.17606e-17	1.54373e-16	SFMBT1	3	52903572	53046750	-	5676	protein_coding	Scm like with four mbt domains 1 [Source:HGNC Symbol;Acc:HGNC:20255]	-
ENSG00000119125	157.076	149.5	143.222	28.2635	33.7725	44.3236	149.932	35.4532	2.07814	1.22854e-17	1.6116e-16	GDA	9	72114595	72257193	+	7904	protein_coding	guanine deaminase [Source:HGNC Symbol;Acc:HGNC:4212]	-
ENSG00000105131	79.103	83.9655	78.7173	6.38207	8.44313	7.97825	80.5953	7.60115	3.40735	1.25111e-17	1.63914e-16	EPHX3	19	15226919	15233435	-	2034	protein_coding	epoxide hydrolase 3 [Source:HGNC Symbol;Acc:HGNC:23760]	-
ENSG00000064763	136.735	166.907	173.834	367.425	379.003	381.183	159.159	375.87	-1.2383	1.39e-17	1.81881e-16	FAR2	12	29149103	29340980	+	5411	protein_coding	fatty acyl-CoA reductase 2 [Source:HGNC Symbol;Acc:HGNC:25531]	-
ENSG00000110011	539.03	437.235	524.782	229.755	220.46	241.12	500.349	230.445	1.11717	1.41585e-17	1.85148e-16	DNAJC4	11	64230278	64234286	+	2807	protein_coding	DnaJ heat shock protein family (Hsp40) member C4 [Source:HGNC Symbol;Acc:HGNC:5271]	-
ENSG00000171033	35.0313	20.4794	37.1721	132.2	159.481	148.041	30.8943	146.574	-2.25298	1.41942e-17	1.85497e-16	PKIA	8	78516139	78605267	+	4216	protein_coding	cAMP-dependent protein kinase inhibitor alpha [Source:HGNC Symbol;Acc:HGNC:9017]	-
ENSG00000196352	688.196	739.306	607.872	303.604	333.035	364.34	678.458	333.66	1.02398	1.45384e-17	1.89757e-16	CD55	1	207321376	207386804	+	5908	protein_coding	CD55 molecule (Cromer blood group) [Source:HGNC Symbol;Acc:HGNC:2665]	-
ENSG00000121413	557.111	456.69	508.383	243.43	247.665	217.186	507.395	236.094	1.10338	1.78935e-17	2.32963e-16	ZSCAN18	19	58083838	58118427	-	8307	protein_coding	zinc finger and SCAN domain containing 18 [Source:HGNC Symbol;Acc:HGNC:21037]	zf-C2H2
ENSG00000105509	75.7129	77.8217	96.21	8.20552	8.44313	8.86472	83.2482	8.50446	3.29054	1.86631e-17	2.42487e-16	HAS1	19	51713112	51723994	-	2241	protein_coding	hyaluronan synthase 1 [Source:HGNC Symbol;Acc:HGNC:4818]	-
ENSG00000058056	132.215	138.236	132.289	293.575	349.921	372.318	134.247	338.605	-1.33441	1.89607e-17	2.46087e-16	USP13	3	179652755	179789401	+	8440	protein_coding	ubiquitin specific peptidase 13 [Source:HGNC Symbol;Acc:HGNC:12611]	-
ENSG00000042286	77.9729	100.349	100.583	280.811	262.675	245.553	92.9684	263.013	-1.49794	1.97582e-17	2.55798e-16	AIFM2	10	70098223	70132934	-	5135	protein_coding	apoptosis inducing factor, mitochondria associated 2 [Source:HGNC Symbol;Acc:HGNC:21411]	-
ENSG00000141655	15.8206	11.2637	10.933	100.29	101.318	90.4201	12.6724	97.3425	-2.94618	2.32032e-17	2.99094e-16	TNFRSF11A	18	62325287	62391292	+	8999	protein_coding	TNF receptor superfamily member 11a [Source:HGNC Symbol;Acc:HGNC:11908]	-
ENSG00000101049	81.3631	88.0614	92.9301	11.8524	3.7525	11.5241	87.4515	9.04302	3.26611	2.34201e-17	3.01702e-16	SGK2	20	43558968	43588237	+	5184	protein_coding	SGK2, serine/threonine kinase 2 [Source:HGNC Symbol;Acc:HGNC:13900]	-
ENSG00000011021	270.08	275.448	329.082	574.386	591.957	601.914	291.537	589.419	-1.01583	2.43165e-17	3.13057e-16	CLCN6	1	11806096	11848079	+	8174	protein_coding	chloride voltage-gated channel 6 [Source:HGNC Symbol;Acc:HGNC:2024]	-
ENSG00000255501	75.7129	135.164	53.5715	1.82345	3.7525	2.65942	88.1494	2.74512	5.01186	2.79873e-17	3.59203e-16	CARD18	11	105137721	105531697	-	2230	protein_coding	caspase recruitment domain family member 18 [Source:HGNC Symbol;Acc:HGNC:28861]	-
ENSG00000263528	163.856	158.715	168.368	385.659	360.24	365.226	163.646	370.375	-1.17884	2.96209e-17	3.79465e-16	IKBKE	1	206470476	206496889	+	3791	protein_coding	inhibitor of nuclear factor kappa B kinase subunit epsilon [Source:HGNC Symbol;Acc:HGNC:14552]	-
ENSG00000246705	637.344	772.073	586.007	337.338	301.138	315.584	665.141	318.02	1.06524	3.25911e-17	4.16489e-16	H2AFJ	12	14774383	14778002	+	3356	protein_coding	H2A histone family member J [Source:HGNC Symbol;Acc:HGNC:14456]	-
ENSG00000083750	257.65	297.975	273.324	98.4662	102.256	115.241	276.316	105.321	1.39167	3.44971e-17	4.40304e-16	RRAGB	X	55717739	55758774	+	2725	protein_coding	Ras related GTP binding B [Source:HGNC Symbol;Acc:HGNC:19901]	-
ENSG00000176826	209.058	249.849	232.872	82.9669	69.4213	84.2148	230.593	78.8677	1.5477	4.17553e-17	5.31637e-16	FKBP9P1	7	55681074	55713252	-	3458	transcribed_unprocessed_pseudogene	FK506 binding protein 9 pseudogene 1 [Source:HGNC Symbol;Acc:HGNC:23568]	-
ENSG00000205208	137.865	142.332	100.583	285.37	410.899	398.912	126.927	365.06	-1.52331	4.18107e-17	5.32018e-16	C4orf46	4	158666679	158672255	-	3730	protein_coding	chromosome 4 open reading frame 46 [Source:HGNC Symbol;Acc:HGNC:27320]	-
ENSG00000172403	117.524	127.996	114.796	26.44	23.4531	25.7077	120.106	25.2003	2.25268	4.52723e-17	5.74306e-16	SYNPO2	4	118850688	119061247	+	14034	protein_coding	synaptopodin 2 [Source:HGNC Symbol;Acc:HGNC:17732]	-
ENSG00000174669	129.955	113.661	156.341	339.161	327.406	330.654	133.319	332.407	-1.31976	5.07103e-17	6.42506e-16	SLC29A2	11	66362521	66372214	-	2720	protein_coding	solute carrier family 29 member 2 [Source:HGNC Symbol;Acc:HGNC:11004]	-
ENSG00000182489	90.4034	95.2292	73.2508	7.2938	11.2575	11.5241	86.2945	10.0251	3.10593	5.30898e-17	6.71018e-16	XKRX	X	100913445	100929433	-	3372	protein_coding	XK related X-linked [Source:HGNC Symbol;Acc:HGNC:29845]	-
ENSG00000259781	192.107	272.376	180.394	478.655	528.165	540.748	214.959	515.856	-1.26014	5.52428e-17	6.97381e-16	HMGB1P6	15	71164770	71165415	-	646	processed_pseudogene	high mobility group box 1 pseudogene 6 [Source:HGNC Symbol;Acc:HGNC:4998]	-
ENSG00000107105	65.5425	46.0786	66.691	178.698	209.202	218.959	59.4374	202.286	-1.77113	5.56567e-17	7.01754e-16	ELAVL2	9	23690104	23826337	-	5140	protein_coding	ELAV like RNA binding protein 2 [Source:HGNC Symbol;Acc:HGNC:3313]	-
ENSG00000176928	246.349	203.77	176.021	51.9683	69.4213	64.7124	208.713	62.034	1.75011	5.89531e-17	7.42416e-16	GCNT4	5	75025346	75030899	-	5554	protein_coding	glucosaminyl (N-acetyl) transferase 4, core 2 [Source:HGNC Symbol;Acc:HGNC:17973]	-
ENSG00000204421	82.4931	70.6539	76.5307	9.11724	0.938126	3.54589	76.5592	4.53375	4.07119	6.09233e-17	7.66763e-16	LY6G6C	6	31718648	31721845	-	1103	protein_coding	lymphocyte antigen 6 family member G6C [Source:HGNC Symbol;Acc:HGNC:13936]	-
ENSG00000178531	329.972	295.927	236.152	109.407	102.256	101.944	287.351	104.536	1.45854	6.50106e-17	8.16226e-16	CTXN1	19	7924485	7926166	-	1274	protein_coding	cortexin 1 [Source:HGNC Symbol;Acc:HGNC:31108]	-
ENSG00000113356	328.842	338.934	279.884	585.327	707.347	640.919	315.887	644.531	-1.02817	6.50582e-17	8.16332e-16	POLR3G	5	90471748	90514553	+	4019	protein_coding	RNA polymerase III subunit G [Source:HGNC Symbol;Acc:HGNC:30075]	-
ENSG00000163995	98.3137	68.606	107.143	10.029	14.0719	7.09178	91.3542	10.3975	3.13932	6.56174e-17	8.22851e-16	ABLIM2	4	7965310	8158832	-	6049	protein_coding	actin binding LIM protein family member 2 [Source:HGNC Symbol;Acc:HGNC:19195]	-
ENSG00000229526	375.174	351.222	406.706	170.492	156.667	174.635	377.701	167.265	1.17414	7.19137e-17	8.99635e-16	KRT16P4	17	18450244	18475920	+	755	transcribed_processed_pseudogene	keratin 16 pseudogene 4 [Source:HGNC Symbol;Acc:HGNC:37809]	-
ENSG00000130844	144.645	151.547	159.621	323.662	371.498	370.545	151.938	355.235	-1.22501	7.28511e-17	9.10814e-16	ZNF331	19	53519527	53580269	+	8926	protein_coding	zinc finger protein 331 [Source:HGNC Symbol;Acc:HGNC:15489]	zf-C2H2
ENSG00000142156	523.21	408.564	456.998	204.226	203.573	221.618	462.924	209.806	1.14029	7.31639e-17	9.14175e-16	COL6A1	21	45981737	46005050	+	5343	protein_coding	collagen type VI alpha 1 chain [Source:HGNC Symbol;Acc:HGNC:2211]	-
ENSG00000104177	105.094	135.164	99.4899	293.575	315.21	286.33	113.249	298.372	-1.39444	7.93762e-17	9.90606e-16	MYEF2	15	48134631	48178517	-	14067	protein_coding	myelin expression factor 2 [Source:HGNC Symbol;Acc:HGNC:17940]	Others
ENSG00000128973	181.937	164.859	229.592	456.774	425.909	436.144	192.129	439.609	-1.19541	9.14488e-17	1.13649e-15	CLN6	15	68206992	68257211	-	7345	protein_coding	CLN6, transmembrane ER protein [Source:HGNC Symbol;Acc:HGNC:2077]	-
ENSG00000111788	66.6725	56.3183	74.3441	204.226	192.316	224.277	65.7783	206.94	-1.65619	9.80362e-17	1.21618e-15	AC009533.1	12	9277235	9313241	+	3158	unprocessed_pseudogene	DEAD/H (Asp-Glu-Ala-Asp/His) box polypeptide like pseudogene	-
ENSG00000100350	99.4437	122.876	120.263	259.841	327.406	325.335	114.194	304.194	-1.41173	1.0401e-16	1.28952e-15	FOXRED2	22	36487190	36507101	-	5577	protein_coding	FAD dependent oxidoreductase domain containing 2 [Source:HGNC Symbol;Acc:HGNC:26264]	-
ENSG00000166780	341.273	328.694	365.161	158.64	116.328	148.041	345.043	141.003	1.28975	1.07113e-16	1.32512e-15	C16orf45	16	15434295	15625028	+	3688	protein_coding	chromosome 16 open reading frame 45 [Source:HGNC Symbol;Acc:HGNC:19213]	-
ENSG00000129534	349.183	289.783	340.015	581.68	720.481	766.798	326.327	689.653	-1.08081	1.07137e-16	1.32512e-15	MIS18BP1	14	45203190	45253540	-	6250	protein_coding	MIS18 binding protein 1 [Source:HGNC Symbol;Acc:HGNC:20190]	-
ENSG00000107537	483.658	476.146	482.143	255.283	211.078	232.256	480.649	232.872	1.04496	1.10907e-16	1.37012e-15	PHYH	10	13277796	13302412	-	3381	protein_coding	phytanoyl-CoA 2-hydroxylase [Source:HGNC Symbol;Acc:HGNC:8940]	-
ENSG00000187653	313.022	424.947	267.857	106.672	132.276	106.377	335.276	115.108	1.54458	1.21502e-16	1.49922e-15	TMSB4XP8	4	90838903	90839037	-	135	processed_pseudogene	TMSB4X pseudogene 8 [Source:HGNC Symbol;Acc:HGNC:11885]	-
ENSG00000158186	248.609	217.082	278.79	82.0552	85.3695	96.6254	248.16	88.0167	1.49391	1.28055e-16	1.57821e-15	MRAS	3	138347648	138405534	+	6365	protein_coding	muscle RAS oncogene homolog [Source:HGNC Symbol;Acc:HGNC:7227]	-
ENSG00000185379	72.3227	64.5101	79.8106	196.021	236.408	220.732	72.2145	217.72	-1.59349	1.5817e-16	1.94244e-15	RAD51D	17	35092208	35121522	-	11304	protein_coding	RAD51 paralog D [Source:HGNC Symbol;Acc:HGNC:9823]	-
ENSG00000106077	163.856	138.236	178.207	385.659	361.178	362.567	160.1	369.802	-1.20958	1.60854e-16	1.97308e-15	ABHD11	7	73736094	73738867	-	2289	protein_coding	abhydrolase domain containing 11 [Source:HGNC Symbol;Acc:HGNC:16407]	-
ENSG00000213186	122.045	110.589	98.3966	271.694	289.881	281.898	110.343	281.158	-1.35	1.68527e-16	2.0649e-15	TRIM59	3	160432445	160485773	-	7865	protein_coding	tripartite motif containing 59 [Source:HGNC Symbol;Acc:HGNC:30834]	-
ENSG00000196547	161.596	121.852	178.207	345.544	387.446	409.55	153.885	380.847	-1.30997	1.9111e-16	2.3373e-15	MAN2A2	15	90902218	90922584	+	10002	protein_coding	mannosidase alpha class 2A member 2 [Source:HGNC Symbol;Acc:HGNC:6825]	-
ENSG00000228672	58.7622	60.4142	89.6503	257.106	212.016	208.321	69.6089	225.815	-1.69847	2.17786e-16	2.65886e-15	PROB1	5	139390592	139395713	-	5122	protein_coding	proline rich basic protein 1 [Source:HGNC Symbol;Acc:HGNC:41906]	-
ENSG00000225855	150.296	156.667	170.554	426.687	329.282	375.864	159.172	377.278	-1.24518	2.24243e-16	2.73447e-15	RUSC1-AS1	1	155316863	155324176	-	3516	antisense	RUSC1 antisense RNA 1 [Source:HGNC Symbol;Acc:HGNC:26680]	-
ENSG00000112561	395.515	418.804	408.893	198.756	192.316	192.364	407.737	194.479	1.06834	2.28967e-16	2.7888e-15	TFEB	6	41683978	41736259	-	5648	protein_coding	transcription factor EB [Source:HGNC Symbol;Acc:HGNC:11753]	bHLH
ENSG00000106479	497.219	387.06	444.971	192.374	192.316	215.413	443.084	200.034	1.14576	2.6516e-16	3.22208e-15	ZNF862	7	149838367	149867479	+	8430	protein_coding	zinc finger protein 862 [Source:HGNC Symbol;Acc:HGNC:34519]	-
ENSG00000160862	74.5828	53.2464	100.583	1.82345	3.7525	1.77294	76.1375	2.44963	4.96574	2.69349e-16	3.27107e-15	AZGP1	7	99966720	99976157	-	2699	protein_coding	alpha-2-glycoprotein 1, zinc-binding [Source:HGNC Symbol;Acc:HGNC:910]	-
ENSG00000198074	96.0536	77.8217	57.9447	3.6469	5.62876	8.86472	77.2733	6.04679	3.66993	2.7595e-16	3.34927e-15	AKR1B10	7	134527592	134541408	+	1744	protein_coding	aldo-keto reductase family 1 member B10 [Source:HGNC Symbol;Acc:HGNC:382]	-
ENSG00000138111	31.6412	39.9348	36.0788	171.404	149.162	125.879	35.8849	148.815	-2.04883	2.79527e-16	3.39071e-15	MFSD13A	10	102461395	102477045	+	3526	protein_coding	major facilitator superfamily domain containing 13A [Source:HGNC Symbol;Acc:HGNC:26196]	-
ENSG00000182118	578.582	647.149	509.476	299.957	281.438	273.92	578.402	285.105	1.02132	3.48294e-16	4.21503e-15	FAM89A	1	231018958	231040246	-	2394	protein_coding	family with sequence similarity 89 member A [Source:HGNC Symbol;Acc:HGNC:25057]	-
ENSG00000143631	174.027	141.308	157.435	26.44	43.1538	47.8695	157.59	39.1544	2.00726	3.6835e-16	4.45256e-15	FLG	1	152302175	152325203	-	12747	protein_coding	filaggrin [Source:HGNC Symbol;Acc:HGNC:3748]	-
ENSG00000146376	214.708	199.674	224.126	414.835	452.177	466.284	212.836	444.432	-1.06306	4.22203e-16	5.09168e-15	ARHGAP18	6	129576132	129710225	-	4640	protein_coding	Rho GTPase activating protein 18 [Source:HGNC Symbol;Acc:HGNC:21035]	-
ENSG00000214822	102.834	98.3011	86.3704	18.2345	9.38126	16.843	95.8351	14.8196	2.68891	4.2331e-16	5.10207e-15	KRT16P3	17	20501513	20512357	-	2351	transcribed_unprocessed_pseudogene	keratin 16 pseudogene 3 [Source:HGNC Symbol;Acc:HGNC:37808]	-
ENSG00000126016	134.475	150.524	162.901	35.5573	45.9682	38.1183	149.3	39.8812	1.90615	4.54644e-16	5.47021e-15	AMOT	X	112774503	112840815	-	8502	protein_coding	angiomotin [Source:HGNC Symbol;Acc:HGNC:17810]	-
ENSG00000170919	322.062	333.814	334.549	157.728	121.956	141.836	330.142	140.507	1.23191	4.678e-16	5.61874e-15	TPT1-AS1	13	45341345	45393413	+	10402	processed_transcript	TPT1 antisense RNA 1 [Source:HGNC Symbol;Acc:HGNC:43686]	-
ENSG00000226328	349.183	356.341	333.455	154.993	119.142	162.224	346.327	145.453	1.25038	4.84675e-16	5.8147e-15	NUP50-DT	22	45133020	45163781	-	2263	lincRNA	NUP50 divergent transcript [Source:HGNC Symbol;Acc:HGNC:50502]	-
ENSG00000116990	283.641	295.927	248.178	121.259	92.8745	102.831	275.915	105.655	1.38476	4.95835e-16	5.9383e-15	MYCL	1	39895426	39902256	-	5063	protein_coding	MYCL proto-oncogene, bHLH transcription factor [Source:HGNC Symbol;Acc:HGNC:7555]	bHLH
ENSG00000230943	140.125	149.5	138.849	40.1159	38.4632	37.2318	142.824	38.6036	1.88808	5.07841e-16	6.07859e-15	LINC02541	6	113616927	113650090	-	2145	lincRNA	long intergenic non-protein coding RNA 2541 [Source:HGNC Symbol;Acc:HGNC:53574]	-
ENSG00000188001	89.2734	104.445	110.423	19.1462	17.8244	18.6159	101.38	18.5288	2.45225	5.2923e-16	6.33096e-15	TPRG1	3	188947214	189325304	+	9535	protein_coding	tumor protein p63 regulated 1 [Source:HGNC Symbol;Acc:HGNC:24759]	-
ENSG00000166546	150.296	126.972	122.449	30.9986	27.2056	37.2318	133.239	31.812	2.06343	5.44565e-16	6.50317e-15	BEAN1	16	66427297	66493529	+	7379	protein_coding	brain expressed associated with NEDD4 1 [Source:HGNC Symbol;Acc:HGNC:24160]	-
ENSG00000196730	146.906	155.643	126.822	31.9104	30.9582	44.3236	143.124	35.7307	2.00008	5.97291e-16	7.11239e-15	DAPK1	9	87497228	87708633	+	8907	protein_coding	death associated protein kinase 1 [Source:HGNC Symbol;Acc:HGNC:2674]	-
ENSG00000235109	118.654	156.667	95.1167	24.6166	26.2675	23.0483	123.48	24.6441	2.32756	6.71093e-16	7.95474e-15	ZSCAN31	6	28324693	28356271	-	4957	protein_coding	zinc finger and SCAN domain containing 31 [Source:HGNC Symbol;Acc:HGNC:14097]	zf-C2H2
ENSG00000170855	615.873	743.402	606.779	336.426	277.685	348.383	655.351	320.832	1.03052	6.92095e-16	8.199e-15	TRIAP1	12	120443961	120446412	-	1442	protein_coding	TP53 regulated inhibitor of apoptosis 1 [Source:HGNC Symbol;Acc:HGNC:26937]	-
ENSG00000171877	50.8519	55.2944	53.5715	161.375	184.811	177.294	53.2393	174.493	-1.7115	7.17732e-16	8.49302e-15	FRMD5	15	43870761	44195252	-	6673	protein_coding	FERM domain containing 5 [Source:HGNC Symbol;Acc:HGNC:28214]	-
ENSG00000205542	22806.5	32943.1	21709.6	8445.3	7810.84	8549.13	25819.7	8268.42	1.6428	7.25249e-16	8.57709e-15	TMSB4X	X	12975108	12977227	+	1705	protein_coding	thymosin beta 4 X-linked [Source:HGNC Symbol;Acc:HGNC:11881]	-
ENSG00000185112	90.4034	89.0853	115.889	18.2345	11.2575	18.6159	98.4594	16.036	2.61428	7.65958e-16	9.04824e-15	FAM43A	3	194686544	194689037	+	2494	protein_coding	family with sequence similarity 43 member A [Source:HGNC Symbol;Acc:HGNC:26888]	-
ENSG00000160298	35.0313	29.6951	39.3586	139.494	129.461	147.154	34.695	138.703	-2.00213	9.24555e-16	1.08846e-14	C21orf58	21	46300181	46323875	-	5315	protein_coding	chromosome 21 open reading frame 58 [Source:HGNC Symbol;Acc:HGNC:1300]	-
ENSG00000185962	67.8026	67.582	65.5977	1.82345	5.62876	1.77294	66.9941	3.07505	4.45949	9.27076e-16	1.09081e-14	LCE3A	1	152622834	152623103	-	270	protein_coding	late cornified envelope 3A [Source:HGNC Symbol;Acc:HGNC:29461]	-
ENSG00000104267	235.049	209.914	204.446	74.7614	76.9263	82.4419	216.47	78.0432	1.47086	1.08148e-15	1.26746e-14	CA2	8	85463852	85481493	+	2123	protein_coding	carbonic anhydrase 2 [Source:HGNC Symbol;Acc:HGNC:1373]	-
ENSG00000054598	570.672	458.738	483.237	244.342	258.923	221.618	504.216	241.628	1.06095	1.15942e-15	1.35728e-14	FOXC1	6	1609972	1613897	+	3926	protein_coding	forkhead box C1 [Source:HGNC Symbol;Acc:HGNC:3800]	Fork
ENSG00000170634	224.878	330.742	268.951	103.025	93.8126	102.831	274.857	99.8894	1.46155	1.16374e-15	1.36157e-14	ACYP2	2	53970838	54305300	+	4964	protein_coding	acylphosphatase 2 [Source:HGNC Symbol;Acc:HGNC:180]	-
ENSG00000111186	157.076	134.14	169.461	368.337	353.673	331.54	153.559	351.184	-1.19494	1.19269e-15	1.39465e-14	WNT5B	12	1529891	1647243	+	4305	protein_coding	Wnt family member 5B [Source:HGNC Symbol;Acc:HGNC:16265]	-
ENSG00000164520	159.336	188.41	155.248	58.3504	37.525	46.0965	167.665	47.324	1.82481	1.2394e-15	1.44683e-14	RAET1E	6	149883375	149898102	-	3004	protein_coding	retinoic acid early transcript 1E [Source:HGNC Symbol;Acc:HGNC:16793]	-
ENSG00000187837	154.816	139.26	120.263	20.0579	35.6488	38.1183	138.113	31.275	2.14196	1.24402e-15	1.45141e-14	HIST1H1C	6	26055787	26056428	-	642	protein_coding	histone cluster 1 H1 family member c [Source:HGNC Symbol;Acc:HGNC:4716]	-
ENSG00000284946	2.26009	7.16779	4.37318	71.1145	67.5451	85.1013	4.60035	74.587	-3.99922	1.26735e-15	1.47696e-14	AC068831.7	15	90966190	91022566	-	7148	protein_coding	novel transcript	-
ENSG00000170264	47.4618	53.2464	54.6648	172.316	156.667	186.159	51.791	171.714	-1.7286	1.27034e-15	1.47962e-14	FAM161A	2	61824854	61854143	-	5252	protein_coding	FAM161A, centrosomal protein [Source:HGNC Symbol;Acc:HGNC:25808]	-
ENSG00000137135	35.0313	28.6711	36.0788	136.759	131.338	132.971	33.2604	133.689	-2.00994	1.34159e-15	1.55998e-14	ARHGEF39	9	35658875	35675866	-	6496	protein_coding	Rho guanine nucleotide exchange factor 39 [Source:HGNC Symbol;Acc:HGNC:25909]	-
ENSG00000163923	132.215	197.626	145.408	363.778	397.765	384.729	158.416	382.091	-1.26664	1.35511e-15	1.57482e-14	RPL39L	3	187120948	187180908	-	1060	protein_coding	ribosomal protein L39 like [Source:HGNC Symbol;Acc:HGNC:17094]	-
ENSG00000162892	94.9236	71.6779	84.1838	240.695	214.831	239.347	83.5951	231.624	-1.47355	1.45884e-15	1.69347e-14	IL24	1	206897443	206904139	+	1979	protein_coding	interleukin 24 [Source:HGNC Symbol;Acc:HGNC:11346]	-
ENSG00000169255	58.7622	73.7258	83.0905	216.99	207.326	208.321	71.8595	210.879	-1.55146	1.46563e-15	1.70041e-14	B3GALNT1	3	161083883	161105384	-	4183	protein_coding	beta-1,3-N-acetylgalactosaminyltransferase 1 (globoside blood group) [Source:HGNC Symbol;Acc:HGNC:918]	-
ENSG00000120278	113.004	102.397	99.4899	16.411	15.9481	26.5942	104.964	19.6511	2.41274	1.69288e-15	1.96078e-14	PLEKHG1	6	150599883	150843665	+	10294	protein_coding	pleckstrin homology and RhoGEF domain containing G1 [Source:HGNC Symbol;Acc:HGNC:20884]	-
ENSG00000188807	277.99	208.89	289.723	588.062	542.237	515.927	258.868	548.742	-1.08588	1.85094e-15	2.14146e-14	TMEM201	1	9588922	9614873	+	6966	protein_coding	transmembrane protein 201 [Source:HGNC Symbol;Acc:HGNC:33719]	-
ENSG00000182585	127.695	156.667	146.502	41.9393	28.1438	41.6642	143.621	37.2491	1.94565	2.4356e-15	2.80384e-14	EPGN	4	74308473	74315307	+	1814	protein_coding	epithelial mitogen [Source:HGNC Symbol;Acc:HGNC:17470]	-
ENSG00000256087	397.775	349.174	456.998	155.905	186.687	187.046	401.315	176.546	1.18399	2.50203e-15	2.87553e-14	ZNF432	19	52031379	52095738	-	5985	protein_coding	zinc finger protein 432 [Source:HGNC Symbol;Acc:HGNC:20810]	zf-C2H2
ENSG00000075131	82.4931	95.2292	80.9039	245.254	221.398	226.937	86.2087	231.196	-1.42148	2.72485e-15	3.12643e-14	TIPIN	15	66336206	66386746	-	2755	protein_coding	TIMELESS interacting protein [Source:HGNC Symbol;Acc:HGNC:30750]	-
ENSG00000183145	6.78026	3.07191	7.65307	77.4966	79.7407	64.7124	5.83508	73.9832	-3.67747	2.96382e-15	3.39687e-14	RIPPLY3	21	37006150	37019659	+	2319	protein_coding	ripply transcriptional repressor 3 [Source:HGNC Symbol;Acc:HGNC:3047]	-
ENSG00000232855	77.9729	61.4382	61.2246	5.47035	6.56688	3.54589	66.8786	5.19437	3.69131	3.30337e-15	3.78185e-14	AF165147.1	21	28439346	28674848	-	6532	lincRNA	novel transcript	-
ENSG00000008405	172.897	196.602	179.301	376.542	407.147	378.523	182.933	387.404	-1.08108	3.30956e-15	3.78686e-14	CRY1	12	106991364	107093829	-	5062	protein_coding	cryptochrome circadian regulator 1 [Source:HGNC Symbol;Acc:HGNC:2384]	-
ENSG00000100271	159.336	159.739	141.035	43.7628	42.2157	49.6424	153.37	45.207	1.7615	3.32545e-15	3.80295e-14	TTLL1	22	43039644	43089428	-	1749	protein_coding	tubulin tyrosine ligase like 1 [Source:HGNC Symbol;Acc:HGNC:1312]	-
ENSG00000095397	355.963	371.701	362.974	160.463	179.182	174.635	363.546	171.427	1.08492	3.61458e-15	4.12904e-14	WHRN	9	114402080	114505450	-	5542	protein_coding	whirlin [Source:HGNC Symbol;Acc:HGNC:16361]	-
ENSG00000134321	209.058	120.828	228.499	51.0566	47.8444	29.2536	186.128	42.7182	2.12379	3.62047e-15	4.13351e-14	RSAD2	2	6865806	6898239	+	4834	protein_coding	radical S-adenosyl methionine domain containing 2 [Source:HGNC Symbol;Acc:HGNC:30908]	-
ENSG00000116127	174.027	191.482	163.994	352.837	426.847	382.956	176.501	387.547	-1.13337	3.71339e-15	4.23493e-14	ALMS1	2	73385758	73610793	+	14054	protein_coding	ALMS1, centrosome and basal body associated protein [Source:HGNC Symbol;Acc:HGNC:428]	-
ENSG00000213722	642.994	756.713	601.313	373.807	276.747	320.016	667.007	323.523	1.04407	3.79735e-15	4.32832e-14	DDAH2	6	31727038	31730617	-	2538	protein_coding	dimethylarginine dimethylaminohydrolase 2 [Source:HGNC Symbol;Acc:HGNC:2716]	-
ENSG00000137656	189.847	186.362	162.901	411.188	355.55	396.253	179.704	387.663	-1.10936	4.20779e-15	4.78826e-14	BUD13	11	116748170	116772988	-	2196	protein_coding	BUD13 homolog [Source:HGNC Symbol;Acc:HGNC:28199]	-
ENSG00000256663	30.5111	17.4075	28.4257	117.612	113.513	124.106	25.4481	118.411	-2.22584	4.36881e-15	4.96606e-14	AC112777.1	12	20551590	20553012	+	1423	processed_pseudogene	ubiquitin-like with PHD and ring finger domains 1 (UHRF1) pseudogene	-
ENSG00000132854	72.3227	52.2224	78.7173	0.911724	1.87625	3.54589	67.7542	2.11129	4.99334	4.52841e-15	5.14466e-14	KANK4	1	62236979	62319414	-	5980	protein_coding	KN motif and ankyrin repeat domains 4 [Source:HGNC Symbol;Acc:HGNC:27263]	-
ENSG00000150764	411.335	393.204	430.759	185.992	185.749	219.845	411.766	197.195	1.06114	4.7394e-15	5.37261e-14	DIXDC1	11	111927144	112022584	+	8509	protein_coding	DIX domain containing 1 [Source:HGNC Symbol;Acc:HGNC:23695]	-
ENSG00000133739	65.5425	102.397	68.8776	218.814	228.903	249.099	78.939	232.272	-1.55226	5.22904e-15	5.90833e-14	LRRCC1	8	85107147	85146076	+	5065	protein_coding	leucine rich repeat and coiled-coil centrosomal protein 1 [Source:HGNC Symbol;Acc:HGNC:29373]	-
ENSG00000123146	91.5334	108.541	90.7436	258.93	240.16	243.78	96.9393	247.623	-1.35099	5.61685e-15	6.33963e-14	ADGRE5	19	14380501	14408725	+	5382	protein_coding	adhesion G protein-coupled receptor E5 [Source:HGNC Symbol;Acc:HGNC:1711]	-
ENSG00000158457	68.9326	77.8217	83.0905	199.668	227.026	210.98	76.6149	212.558	-1.47098	6.16323e-15	6.94499e-14	TSPAN33	7	129144892	129169697	+	2750	protein_coding	tetraspanin 33 [Source:HGNC Symbol;Acc:HGNC:28743]	-
ENSG00000158859	13.5605	7.16779	12.0263	86.6138	71.2976	96.6254	10.9182	84.8456	-2.96872	6.30848e-15	7.10097e-14	ADAMTS4	1	161184308	161199056	-	10334	protein_coding	ADAM metallopeptidase with thrombospondin type 1 motif 4 [Source:HGNC Symbol;Acc:HGNC:220]	-
ENSG00000242550	123.175	142.332	127.916	38.2924	30.9582	34.5724	131.141	34.6077	1.9221	6.63484e-15	7.45621e-14	SERPINB10	18	63897174	63936111	+	2700	protein_coding	serpin family B member 10 [Source:HGNC Symbol;Acc:HGNC:8942]	-
ENSG00000176890	127.695	101.373	135.569	309.986	286.128	286.33	121.545	294.148	-1.27746	6.68825e-15	7.51217e-14	TYMS	18	657604	673578	+	2470	protein_coding	thymidylate synthetase [Source:HGNC Symbol;Acc:HGNC:12441]	-
ENSG00000062282	259.91	232.441	236.152	108.495	66.6069	84.2148	242.834	86.439	1.48875	8.61283e-15	9.61665e-14	DGAT2	11	75759512	75801535	+	7905	protein_coding	diacylglycerol O-acyltransferase 2 [Source:HGNC Symbol;Acc:HGNC:16940]	-
ENSG00000165501	93.7935	79.8696	91.8368	248.901	241.098	210.98	88.5	233.66	-1.40208	9.36069e-15	1.04125e-13	LRR1	14	49598697	49614672	+	2359	protein_coding	leucine rich repeat protein 1 [Source:HGNC Symbol;Acc:HGNC:19742]	-
ENSG00000078081	132.215	116.733	116.983	278.076	315.21	273.92	121.977	289.069	-1.24553	9.42658e-15	1.04802e-13	LAMP3	3	183122213	183163839	-	3816	protein_coding	lysosomal associated membrane protein 3 [Source:HGNC Symbol;Acc:HGNC:14582]	-
ENSG00000159147	262.17	229.369	213.193	539.741	451.239	461.852	234.911	484.277	-1.0446	9.80047e-15	1.08842e-13	DONSON	21	33559542	33588708	-	3513	protein_coding	downstream neighbor of SON [Source:HGNC Symbol;Acc:HGNC:2993]	-
ENSG00000105227	311.892	294.903	260.204	117.612	127.585	124.993	289	123.397	1.22773	9.84226e-15	1.09248e-13	PRX	19	40393768	40413366	-	5767	protein_coding	periaxin [Source:HGNC Symbol;Acc:HGNC:13797]	-
ENSG00000027869	125.435	112.637	158.528	384.748	287.067	327.995	132.2	333.27	-1.33551	9.95821e-15	1.10417e-13	SH2D2A	1	156806243	156816862	-	2512	protein_coding	SH2 domain containing 2A [Source:HGNC Symbol;Acc:HGNC:10821]	-
ENSG00000212724	50.8519	48.1266	45.9184	196.021	170.739	135.63	48.299	167.463	-1.79373	1.05128e-14	1.16442e-13	KRTAP2-3	17	41059240	41060114	-	875	protein_coding	keratin associated protein 2-3 [Source:HGNC Symbol;Acc:HGNC:18906]	-
ENSG00000019582	177.417	209.914	233.965	476.832	414.652	426.393	207.099	439.292	-1.08402	1.11581e-14	1.23392e-13	CD74	5	150401637	150412929	-	3184	protein_coding	CD74 molecule [Source:HGNC Symbol;Acc:HGNC:1697]	-
ENSG00000085465	82.4931	113.661	99.4899	13.6759	22.515	18.6159	98.5479	18.2689	2.43458	1.25244e-14	1.38061e-13	OVGP1	1	111414314	111427777	-	2567	protein_coding	oviductal glycoprotein 1 [Source:HGNC Symbol;Acc:HGNC:8524]	-
ENSG00000197355	395.515	380.917	379.374	188.727	187.625	194.137	385.268	190.163	1.01827	1.30201e-14	1.43373e-13	UAP1L1	9	137077501	137084539	+	5283	protein_coding	UDP-N-acetylglucosamine pyrophosphorylase 1 like 1 [Source:HGNC Symbol;Acc:HGNC:28082]	-
ENSG00000006459	684.806	682.988	646.138	253.459	357.426	371.432	671.31	327.439	1.03567	1.34041e-14	1.4729e-13	KDM7A	7	140084746	140177035	-	9430	protein_coding	lysine demethylase 7A [Source:HGNC Symbol;Acc:HGNC:22224]	-
ENSG00000180353	91.5334	89.0853	100.583	253.459	230.779	229.596	93.734	237.945	-1.3445	1.39734e-14	1.53302e-13	HCLS1	3	121631399	121660927	-	5093	protein_coding	hematopoietic cell-specific Lyn substrate 1 [Source:HGNC Symbol;Acc:HGNC:4844]	-
ENSG00000125744	400.035	348.15	371.721	182.345	166.048	184.386	373.302	177.593	1.07055	1.46261e-14	1.60294e-13	RTN2	19	45485289	45497061	-	3238	protein_coding	reticulon 2 [Source:HGNC Symbol;Acc:HGNC:10468]	-
ENSG00000177989	197.757	186.362	172.741	62.909	60.9782	70.0313	185.62	64.6395	1.52081	1.52245e-14	1.66676e-13	ODF3B	22	50529710	50532580	-	2301	protein_coding	outer dense fiber of sperm tails 3B [Source:HGNC Symbol;Acc:HGNC:34388]	-
ENSG00000165209	185.327	208.89	185.86	401.159	379.941	409.55	193.359	396.883	-1.03643	1.60836e-14	1.75711e-13	STRBP	9	123109500	123268576	-	8097	protein_coding	spermatid perinuclear RNA binding protein [Source:HGNC Symbol;Acc:HGNC:16462]	-
ENSG00000103253	959.406	1216.48	880.103	583.504	460.62	397.139	1018.66	480.421	1.08506	1.62877e-14	1.77847e-13	HAGHL	16	726936	735525	+	5287	protein_coding	hydroxyacylglutathione hydrolase like [Source:HGNC Symbol;Acc:HGNC:14177]	-
ENSG00000204498	395.515	413.684	348.761	189.639	190.44	152.473	385.987	177.517	1.12185	1.68947e-14	1.84377e-13	NFKBIL1	6	31546870	31558829	+	1779	protein_coding	NFKB inhibitor like 1 [Source:HGNC Symbol;Acc:HGNC:7800]	-
ENSG00000164638	146.906	133.116	182.58	37.3807	46.9063	47.8695	154.201	44.0522	1.80666	1.71095e-14	1.86624e-13	SLC29A4	7	5274369	5306870	+	5811	protein_coding	solute carrier family 29 member 4 [Source:HGNC Symbol;Acc:HGNC:23097]	-
ENSG00000125845	353.703	305.143	309.403	145.876	127.585	155.133	322.75	142.865	1.17415	1.81266e-14	1.97511e-13	BMP2	20	6767664	6780280	+	3601	protein_coding	bone morphogenetic protein 2 [Source:HGNC Symbol;Acc:HGNC:1069]	-
ENSG00000116396	319.802	302.071	330.175	142.229	135.09	155.133	317.349	144.151	1.13742	1.88566e-14	2.05249e-13	KCNC4	1	110211343	110283100	+	25042	protein_coding	potassium voltage-gated channel subfamily C member 4 [Source:HGNC Symbol;Acc:HGNC:6236]	-
ENSG00000151287	122.045	133.116	119.169	306.339	270.18	289.876	124.777	288.799	-1.20989	2.02741e-14	2.20102e-13	TEX30	13	102765990	102773811	-	2154	protein_coding	testis expressed 30 [Source:HGNC Symbol;Acc:HGNC:25188]	-
ENSG00000111319	145.775	113.661	126.822	40.1159	17.8244	28.3671	128.753	28.7691	2.15865	2.20814e-14	2.39473e-13	SCNN1A	12	6346843	6377730	-	5876	protein_coding	sodium channel epithelial 1 alpha subunit [Source:HGNC Symbol;Acc:HGNC:10599]	-
ENSG00000198046	250.869	270.328	266.764	108.495	106.008	119.674	262.654	111.392	1.23726	2.31042e-14	2.50303e-13	ZNF667	19	56439325	56478065	-	8810	protein_coding	zinc finger protein 667 [Source:HGNC Symbol;Acc:HGNC:28854]	zf-C2H2
ENSG00000172244	48.5918	55.2944	39.3586	172.316	155.729	148.927	47.7483	158.991	-1.73299	2.4484e-14	2.64838e-13	C5orf34	5	43486701	43515145	-	3011	protein_coding	chromosome 5 open reading frame 34 [Source:HGNC Symbol;Acc:HGNC:24738]	-
ENSG00000125850	15.8206	15.3595	17.4927	89.349	105.07	83.3284	16.2243	92.5825	-2.51276	2.54581e-14	2.74945e-13	OVOL2	20	17956979	18059188	-	2175	protein_coding	ovo like zinc finger 2 [Source:HGNC Symbol;Acc:HGNC:15804]	zf-C2H2
ENSG00000173281	396.645	397.3	371.721	171.404	190.44	204.775	388.555	188.873	1.04045	2.63595e-14	2.84384e-13	PPP1R3B	8	9136255	9151574	-	5776	protein_coding	protein phosphatase 1 regulatory subunit 3B [Source:HGNC Symbol;Acc:HGNC:14942]	-
ENSG00000124615	48.5918	48.1266	59.038	167.757	164.172	157.792	51.9188	163.24	-1.6532	2.66929e-14	2.87682e-13	MOCS1	6	39899578	39934551	-	5174	protein_coding	molybdenum cofactor synthesis 1 [Source:HGNC Symbol;Acc:HGNC:7190]	-
ENSG00000164741	138.995	149.5	182.58	359.219	363.993	326.222	157.025	349.811	-1.15519	2.71914e-14	2.92751e-13	DLC1	8	13083361	13604610	-	12794	protein_coding	DLC1 Rho GTPase activating protein [Source:HGNC Symbol;Acc:HGNC:2897]	-
ENSG00000268104	83.6232	56.3183	55.7581	0.911724	2.81438	1.77294	65.2332	1.83302	5.15843	2.82744e-14	3.03782e-13	SLC6A14	X	116436622	116461458	+	4520	protein_coding	solute carrier family 6 member 14 [Source:HGNC Symbol;Acc:HGNC:11047]	-
ENSG00000131979	169.506	169.979	150.875	332.779	381.817	341.292	163.453	351.963	-1.10598	2.86947e-14	3.08138e-13	GCH1	14	54842008	54902852	-	2951	protein_coding	GTP cyclohydrolase 1 [Source:HGNC Symbol;Acc:HGNC:4193]	-
ENSG00000167741	161.596	150.524	123.542	36.469	33.7725	49.6424	145.221	39.9613	1.85901	3.11478e-14	3.33619e-13	GGT6	17	4556927	4560818	-	3161	protein_coding	gamma-glutamyltransferase 6 [Source:HGNC Symbol;Acc:HGNC:26891]	-
ENSG00000156486	100.574	139.26	108.236	27.3517	19.7006	31.0265	116.023	26.0263	2.15517	3.29869e-14	3.52409e-13	KCNS2	8	98427022	98432848	+	5348	protein_coding	potassium voltage-gated channel modifier subfamily S member 2 [Source:HGNC Symbol;Acc:HGNC:6301]	-
ENSG00000141441	175.157	166.907	178.207	48.3214	66.6069	58.5071	173.424	57.8118	1.58539	3.36647e-14	3.59465e-13	GAREM1	18	32124877	32470484	-	7568	protein_coding	GRB2 associated regulator of MAPK1 subtype 1 [Source:HGNC Symbol;Acc:HGNC:26136]	-
ENSG00000164463	287.031	275.448	282.07	82.0552	127.585	122.333	281.516	110.658	1.34716	3.3816e-14	3.60895e-13	CREBRF	5	173056352	173139284	+	12333	protein_coding	CREB3 regulatory factor [Source:HGNC Symbol;Acc:HGNC:24050]	-
ENSG00000158258	90.4034	70.6539	86.3704	15.4993	12.1956	12.4106	82.4759	13.3685	2.62365	3.4159e-14	3.64368e-13	CLSTN2	3	139935185	140577397	+	14596	protein_coding	calsyntenin 2 [Source:HGNC Symbol;Acc:HGNC:17448]	-
ENSG00000100170	63.2824	58.3663	59.038	0.911724	2.81438	2.65942	60.2289	2.12851	4.82301	3.80371e-14	4.0449e-13	SLC5A1	22	32043032	32113029	+	5310	protein_coding	solute carrier family 5 member 1 [Source:HGNC Symbol;Acc:HGNC:11036]	-
ENSG00000215769	126.565	137.212	123.542	30.9986	35.6488	39.8912	129.106	35.5129	1.8619	3.89982e-14	4.14286e-13	ARHGAP27P1-BPTFP1-KPNA2P3	17	64749663	64781707	-	3038	processed_transcript	ARHGAP27P1-BPTFP1-KPNA2P3 readthrough, transcribed pseudogene [Source:HGNC Symbol;Acc:HGNC:52873]	-
ENSG00000204131	63.2824	47.1026	64.5045	154.081	189.501	205.661	58.2965	183.081	-1.65453	4.65609e-14	4.92862e-13	NHSL2	X	71910818	72161750	+	17706	protein_coding	NHS like 2 [Source:HGNC Symbol;Acc:HGNC:33737]	-
ENSG00000135049	238.439	219.129	299.563	477.744	521.598	546.953	252.377	515.432	-1.03123	4.68358e-14	4.95268e-13	AGTPBP1	9	85546539	85742029	-	4939	protein_coding	ATP/GTP binding protein 1 [Source:HGNC Symbol;Acc:HGNC:17258]	-
ENSG00000053108	51.982	66.558	63.4112	6.38207	1.87625	4.43236	60.6504	4.23023	3.8366	4.80658e-14	5.08016e-13	FSTL4	5	133196455	133612564	-	6734	protein_coding	follistatin like 4 [Source:HGNC Symbol;Acc:HGNC:21389]	-
ENSG00000108309	146.906	163.835	173.834	47.4097	54.4113	55.8477	161.525	52.5562	1.62012	4.91244e-14	5.18941e-13	RUNDC3A	17	44308413	44318671	+	4905	protein_coding	RUN domain containing 3A [Source:HGNC Symbol;Acc:HGNC:16984]	-
ENSG00000144476	87.0133	69.6299	103.863	15.4993	12.1956	15.9565	86.8354	14.5505	2.57389	5.0924e-14	5.37678e-13	ACKR3	2	236567787	236582358	+	2258	protein_coding	atypical chemokine receptor 3 [Source:HGNC Symbol;Acc:HGNC:23692]	-
ENSG00000236144	290.421	281.592	325.802	129.465	140.719	132.971	299.272	134.385	1.15505	5.40219e-14	5.69808e-13	TMEM147-AS1	19	35540738	35546029	-	4859	antisense	TMEM147 antisense RNA 1 [Source:HGNC Symbol;Acc:HGNC:51273]	-
ENSG00000142552	19.2107	29.6951	36.0788	157.728	107.884	117.014	28.3282	127.542	-2.16748	5.59358e-14	5.88502e-13	RCN3	19	49527618	49546962	+	2093	protein_coding	reticulocalbin 3 [Source:HGNC Symbol;Acc:HGNC:21145]	-
ENSG00000162757	368.394	328.694	319.242	157.728	168.863	150.7	338.777	159.097	1.09043	6.61301e-14	6.93649e-13	C1orf74	1	209779208	209784559	-	4684	protein_coding	chromosome 1 open reading frame 74 [Source:HGNC Symbol;Acc:HGNC:26319]	-
ENSG00000100033	37.2914	72.7018	80.9039	2.73517	3.7525	0.886472	63.6324	2.45805	4.70881	7.20406e-14	7.52984e-13	PRODH	22	18912777	18936553	-	8776	protein_coding	proline dehydrogenase 1 [Source:HGNC Symbol;Acc:HGNC:9453]	-
ENSG00000133678	402.295	405.492	454.811	184.168	223.274	216.299	420.866	207.914	1.01744	7.31312e-14	7.63998e-13	TMEM254	10	80078646	80092557	+	2996	protein_coding	transmembrane protein 254 [Source:HGNC Symbol;Acc:HGNC:25804]	-
ENSG00000185052	66.6725	75.7737	79.8106	9.11724	9.38126	13.2971	74.0856	10.5985	2.8027	7.33174e-14	7.65174e-13	SLC24A3	20	19212646	19722937	+	3933	protein_coding	solute carrier family 24 member 3 [Source:HGNC Symbol;Acc:HGNC:10977]	-
ENSG00000203995	46.3317	33.791	31.7056	119.436	166.986	137.403	37.2761	141.275	-1.92503	7.55412e-14	7.87197e-13	ZYG11A	1	52842511	52894998	+	4694	protein_coding	zyg-11 family member A, cell cycle regulator [Source:HGNC Symbol;Acc:HGNC:32058]	-
ENSG00000185133	14.6906	8.19176	16.3994	75.6731	99.4413	81.5554	13.0939	85.5566	-2.7162	8.0915e-14	8.42352e-13	INPP5J	22	31122731	31134696	+	4822	protein_coding	inositol polyphosphate-5-phosphatase J [Source:HGNC Symbol;Acc:HGNC:8956]	-
ENSG00000152926	135.605	140.284	138.849	35.5573	37.525	48.756	138.246	40.6127	1.76565	9.44625e-14	9.80928e-13	ZNF117	7	64971776	65006684	-	10691	protein_coding	zinc finger protein 117 [Source:HGNC Symbol;Acc:HGNC:12897]	zf-C2H2
ENSG00000181126	246.349	325.622	276.604	103.025	132.276	113.468	282.858	116.256	1.28484	1.04065e-13	1.07849e-12	HLA-V	6	29790954	29797811	+	5662	transcribed_unprocessed_pseudogene	major histocompatibility complex, class I, V (pseudogene) [Source:HGNC Symbol;Acc:HGNC:23482]	-
ENSG00000149548	33.9013	27.6472	34.9855	110.319	133.214	127.652	32.178	123.728	-1.94575	1.05604e-13	1.09389e-12	CCDC15	11	124954121	125041489	+	4823	protein_coding	coiled-coil domain containing 15 [Source:HGNC Symbol;Acc:HGNC:25798]	-
ENSG00000203783	61.0223	59.3902	69.9709	1.82345	0	2.65942	63.4612	1.49429	5.38652	1.05795e-13	1.09489e-12	PRR9	1	153217584	153219317	+	1229	protein_coding	proline rich 9 [Source:HGNC Symbol;Acc:HGNC:32057]	-
ENSG00000173085	177.417	235.513	198.98	450.392	404.332	412.209	203.97	422.311	-1.04769	1.05806e-13	1.09489e-12	COQ2	4	83261536	83284914	-	2774	protein_coding	coenzyme Q2, polyprenyltransferase [Source:HGNC Symbol;Acc:HGNC:25223]	-
ENSG00000186205	25.991	21.5034	16.3994	115.789	89.122	103.717	21.2979	102.876	-2.27432	1.115e-13	1.15152e-12	2024-03-01	1	220786759	220819657	+	9258	protein_coding	mitochondrial amidoxime reducing component 1 [Source:HGNC Symbol;Acc:HGNC:26189]	-
ENSG00000124788	471.228	440.307	516.036	196.021	251.418	255.304	475.857	234.247	1.02206	1.15299e-13	1.18898e-12	ATXN1	6	16299112	16761491	-	17812	protein_coding	ataxin 1 [Source:HGNC Symbol;Acc:HGNC:10548]	-
ENSG00000166922	410.205	495.601	373.907	175.051	200.759	219.845	426.571	198.552	1.10388	1.15887e-13	1.19446e-12	SCG5	15	32641676	32697098	+	2196	protein_coding	secretogranin V [Source:HGNC Symbol;Acc:HGNC:10816]	-
ENSG00000117318	334.493	385.013	295.19	165.022	135.09	152.473	338.232	150.862	1.16516	1.25548e-13	1.28955e-12	ID3	1	23557918	23559794	-	1797	protein_coding	inhibitor of DNA binding 3, HLH protein [Source:HGNC Symbol;Acc:HGNC:5362]	bHLH
ENSG00000087258	71.1927	70.6539	71.0642	7.2938	13.1338	8.86472	70.9703	9.76409	2.86542	1.28415e-13	1.31705e-12	GNAO1	16	56191347	56357457	+	13697	protein_coding	G protein subunit alpha o1 [Source:HGNC Symbol;Acc:HGNC:4389]	-
ENSG00000159516	87.0133	43.0067	52.4782	1.82345	2.81438	3.54589	60.8327	2.7279	4.47337	1.31402e-13	1.34702e-12	SPRR2G	1	153149582	153150869	-	568	protein_coding	small proline rich protein 2G [Source:HGNC Symbol;Acc:HGNC:11267]	-
ENSG00000162631	54.242	54.2704	55.7581	160.463	152.915	179.954	54.7568	164.444	-1.58702	1.36409e-13	1.39628e-12	NTNG1	1	107140007	107483458	+	9138	protein_coding	netrin G1 [Source:HGNC Symbol;Acc:HGNC:23319]	-
ENSG00000261087	101.704	116.733	111.516	22.7931	24.3913	32.7995	109.984	26.6613	2.04302	1.38183e-13	1.41305e-12	AP003469.4	8	101166805	101169629	-	2825	lincRNA	novel transcript	-
ENSG00000135905	27.121	13.3116	41.5452	110.319	144.471	138.29	27.326	131.027	-2.26901	1.38814e-13	1.4188e-12	DOCK10	2	224765090	225042445	-	11265	protein_coding	dedicator of cytokinesis 10 [Source:HGNC Symbol;Acc:HGNC:23479]	-
ENSG00000174327	122.045	124.924	111.516	296.31	257.985	268.601	119.495	274.299	-1.19846	1.41635e-13	1.44692e-12	SLC16A13	17	7036075	7040121	+	2087	protein_coding	solute carrier family 16 member 13 [Source:HGNC Symbol;Acc:HGNC:31037]	-
ENSG00000172922	209.058	233.465	231.779	557.064	394.951	475.149	224.767	475.721	-1.08134	1.46293e-13	1.4923e-12	RNASEH2C	11	65714005	65720947	-	5101	protein_coding	ribonuclease H2 subunit C [Source:HGNC Symbol;Acc:HGNC:24116]	-
ENSG00000135439	84.7532	100.349	64.5045	215.167	213.893	254.417	83.2022	227.826	-1.45117	1.4801e-13	1.50834e-12	AGAP2	12	57723761	57742157	-	6728	protein_coding	ArfGAP with GTPase domain, ankyrin repeat and PH domain 2 [Source:HGNC Symbol;Acc:HGNC:16921]	-
ENSG00000172197	31.6412	36.8629	42.6385	129.465	131.338	132.971	37.0475	131.258	-1.82385	1.59064e-13	1.61781e-12	MBOAT1	6	20102145	20212399	-	1794	protein_coding	membrane bound O-acyltransferase domain containing 1 [Source:HGNC Symbol;Acc:HGNC:21579]	-
ENSG00000188883	129.955	102.397	111.516	32.8221	30.02	20.3889	114.623	27.7437	2.04779	1.62477e-13	1.6493e-12	KLRG2	7	139452690	139483712	-	2197	protein_coding	killer cell lectin like receptor G2 [Source:HGNC Symbol;Acc:HGNC:24778]	-
ENSG00000076555	91.5334	56.3183	91.8368	212.432	228.903	225.164	79.8962	222.166	-1.48006	1.69656e-13	1.72133e-12	ACACB	12	109116595	109268226	+	14505	protein_coding	acetyl-CoA carboxylase beta [Source:HGNC Symbol;Acc:HGNC:85]	-
ENSG00000158473	266.69	278.52	253.645	122.171	119.142	113.468	266.285	118.26	1.1716	1.75997e-13	1.7848e-12	CD1D	1	158179947	158184896	+	2253	protein_coding	CD1d molecule [Source:HGNC Symbol;Acc:HGNC:1637]	-
ENSG00000176809	89.2734	83.9655	72.1575	11.8524	17.8244	13.2971	81.7988	14.3246	2.51595	1.89949e-13	1.92346e-12	LRRC37A3	17	64854312	64919480	-	7641	protein_coding	leucine rich repeat containing 37 member A3 [Source:HGNC Symbol;Acc:HGNC:32427]	-
ENSG00000267374	9.04034	14.3356	5.46648	90.2607	65.6688	74.4636	9.61413	76.7977	-2.98723	1.91157e-13	1.93287e-12	AC016205.1	18	39206924	39800318	-	2782	lincRNA	novel transcript	-
ENSG00000088305	41.8116	63.4861	42.6385	138.582	169.801	191.478	49.3121	166.62	-1.75176	2.07142e-13	2.08739e-12	DNMT3B	20	32762385	32809356	+	4630	protein_coding	DNA methyltransferase 3 beta [Source:HGNC Symbol;Acc:HGNC:2979]	-
ENSG00000131620	195.497	234.489	302.843	527.888	521.598	489.332	244.276	512.94	-1.06964	2.10782e-13	2.12235e-12	ANO1	11	70078302	70189528	+	6021	protein_coding	anoctamin 1 [Source:HGNC Symbol;Acc:HGNC:21625]	-
ENSG00000129946	58.7622	61.4382	53.5715	6.38207	4.69063	3.54589	57.924	4.87286	3.57402	2.10815e-13	2.12235e-12	SHC2	19	416583	460996	-	4131	protein_coding	SHC adaptor protein 2 [Source:HGNC Symbol;Acc:HGNC:29869]	-
ENSG00000182134	170.636	138.236	202.26	371.984	371.498	366.999	170.377	370.16	-1.1214	2.12941e-13	2.14168e-12	TDRKH	1	151770107	151791416	-	5092	protein_coding	tudor and KH domain containing [Source:HGNC Symbol;Acc:HGNC:11713]	-
ENSG00000215784	1.13004	11.2637	9.83966	62.909	83.4932	74.4636	7.41112	73.6219	-3.29187	2.14492e-13	2.15623e-12	FAM72D	1	145096000	145112696	+	2397	protein_coding	family with sequence similarity 72 member D [Source:HGNC Symbol;Acc:HGNC:33593]	-
ENSG00000266094	201.148	219.129	218.659	82.9669	83.4932	90.4201	212.979	85.6268	1.31457	2.15529e-13	2.16351e-12	RASSF5	1	206507530	206589448	+	6976	protein_coding	Ras association domain family member 5 [Source:HGNC Symbol;Acc:HGNC:17609]	-
ENSG00000110169	76.8429	73.7258	75.4374	11.8524	13.1338	12.4106	75.3354	12.4656	2.59563	2.17603e-13	2.18328e-12	HPX	11	6431049	6442617	-	3631	protein_coding	hemopexin [Source:HGNC Symbol;Acc:HGNC:5171]	-
ENSG00000275395	70.0626	62.4621	72.1575	10.029	6.56688	10.6377	68.2274	9.07784	2.90532	2.36226e-13	2.3667e-12	FCGBP	19	39863323	39934626	-	12961	protein_coding	Fc fragment of IgG binding protein [Source:HGNC Symbol;Acc:HGNC:13572]	-
ENSG00000172345	296.071	354.293	341.108	157.728	161.358	150.7	330.491	156.595	1.07878	2.65546e-13	2.65278e-12	STARD5	15	81309053	81324183	-	6339	protein_coding	StAR related lipid transfer domain containing 5 [Source:HGNC Symbol;Acc:HGNC:18065]	-
ENSG00000188624	53.112	61.4382	60.1313	2.73517	2.81438	7.97825	58.2271	4.50927	3.68001	3.02015e-13	3.00554e-12	IGFL3	19	46120071	46124674	-	662	protein_coding	IGF like family member 3 [Source:HGNC Symbol;Acc:HGNC:32930]	-
ENSG00000177854	246.349	281.592	249.271	103.025	66.6069	118.787	259.071	96.1397	1.42841	3.14295e-13	3.12475e-12	TMEM187	X	153972327	153983195	+	1924	protein_coding	transmembrane protein 187 [Source:HGNC Symbol;Acc:HGNC:13705]	-
ENSG00000169683	157.076	157.691	148.688	369.248	318.963	304.06	154.485	330.757	-1.09805	3.35309e-13	3.33049e-12	LRRC45	17	82023302	82031151	+	3606	protein_coding	leucine rich repeat containing 45 [Source:HGNC Symbol;Acc:HGNC:28302]	-
ENSG00000130775	404.555	417.78	458.091	245.254	185.749	195.91	426.809	208.971	1.03012	3.37752e-13	3.35155e-12	THEMIS2	1	27872543	27886685	+	4621	protein_coding	thymocyte selection associated family member 2 [Source:HGNC Symbol;Acc:HGNC:16839]	-
ENSG00000179242	75.7129	47.1026	62.3179	179.61	191.378	172.862	61.7111	181.283	-1.55932	3.51594e-13	3.48392e-12	CDH4	20	61252426	61940617	+	7351	protein_coding	cadherin 4 [Source:HGNC Symbol;Acc:HGNC:1763]	-
ENSG00000124215	102.834	108.541	101.677	29.1752	26.2675	22.1618	104.35	25.8682	2.01366	3.94513e-13	3.89619e-12	CDH26	20	59958427	60034011	+	5748	protein_coding	cadherin 26 [Source:HGNC Symbol;Acc:HGNC:15902]	-
ENSG00000134070	531.12	465.906	424.199	227.931	209.202	267.715	473.742	234.949	1.01043	4.06622e-13	4.01387e-12	IRAK2	3	10164865	10243743	+	3483	protein_coding	interleukin 1 receptor associated kinase 2 [Source:HGNC Symbol;Acc:HGNC:6113]	-
ENSG00000106541	20.3408	20.4794	34.9855	110.319	104.132	113.468	25.2685	109.306	-2.11476	4.38305e-13	4.31025e-12	AGR2	7	16791811	16833433	-	2845	protein_coding	anterior gradient 2, protein disulphide isomerase family member [Source:HGNC Symbol;Acc:HGNC:328]	-
ENSG00000125459	178.547	180.219	220.846	426.687	399.642	363.453	193.204	396.594	-1.03763	4.49975e-13	4.42082e-12	MSTO1	1	155610205	155614967	+	4208	protein_coding	misato 1, mitochondrial distribution and morphology regulator [Source:HGNC Symbol;Acc:HGNC:29678]	-
ENSG00000069667	206.798	201.722	193.513	61.9973	82.5551	84.2148	200.678	76.2557	1.39578	4.56283e-13	4.47856e-12	RORA	15	60488284	61229319	-	17040	protein_coding	RAR related orphan receptor A [Source:HGNC Symbol;Acc:HGNC:10258]	THR-like
ENSG00000115461	57.6322	68.606	60.1313	8.20552	8.44313	4.43236	62.1231	7.027	3.15034	4.85756e-13	4.75661e-12	IGFBP5	2	216672105	216695525	-	6442	protein_coding	insulin like growth factor binding protein 5 [Source:HGNC Symbol;Acc:HGNC:5474]	-
ENSG00000103540	201.148	228.345	213.193	379.277	485.949	432.598	214.228	432.608	-1.01264	4.90461e-13	4.80042e-12	CCP110	16	19523811	19553408	+	10142	protein_coding	centriolar coiled-coil protein 110 [Source:HGNC Symbol;Acc:HGNC:24342]	-
ENSG00000141449	71.1927	55.2944	97.3033	190.55	216.707	237.574	74.5968	214.944	-1.52984	5.14231e-13	5.0236e-12	GREB1L	18	21242242	21525417	+	10572	protein_coding	GREB1 like retinoic acid receptor coactivator [Source:HGNC Symbol;Acc:HGNC:31042]	-
ENSG00000184502	64.4124	77.8217	39.3586	0	0.938126	4.43236	60.5309	1.79016	5.05854	5.32023e-13	5.19498e-12	GAST	17	41712326	41715969	+	470	protein_coding	gastrin [Source:HGNC Symbol;Acc:HGNC:4164]	-
ENSG00000261604	12.4305	10.2397	7.65307	69.2911	84.4313	65.5989	10.1077	73.1071	-2.85602	5.62933e-13	5.48906e-12	AC114947.2	5	43287601	43290839	+	2497	antisense	novel transcript, antisense to HMGCS1	-
ENSG00000105327	288.161	348.15	258.018	135.847	126.647	132.084	298.109	131.526	1.18148	6.14171e-13	5.97993e-12	BBC3	19	47220822	47232766	-	3180	protein_coding	BCL2 binding component 3 [Source:HGNC Symbol;Acc:HGNC:17868]	-
ENSG00000054967	171.766	152.571	148.688	346.455	328.344	310.265	157.675	328.355	-1.0591	6.80951e-13	6.62429e-12	RELT	11	73376264	73397474	+	6322	protein_coding	RELT, TNF receptor [Source:HGNC Symbol;Acc:HGNC:13764]	-
ENSG00000227533	74.5828	73.7258	52.4782	4.55862	10.3194	9.75119	66.9289	8.20973	3.0281	6.82511e-13	6.63635e-12	SLC2A1-AS1	1	42959049	42983358	+	3364	lincRNA	SLC2A1 antisense RNA 1 [Source:HGNC Symbol;Acc:HGNC:44187]	-
ENSG00000132773	91.5334	93.1812	92.9301	258.018	203.573	224.277	92.5483	228.623	-1.30478	6.85331e-13	6.66066e-12	TOE1	1	45339670	45343975	+	2742	protein_coding	target of EGR1, exonuclease [Source:HGNC Symbol;Acc:HGNC:15954]	-
ENSG00000196209	96.0536	75.7737	79.8106	12.7641	18.7625	16.843	83.8793	16.1232	2.37889	7.16553e-13	6.95435e-12	SIRPB2	20	1470741	1491587	-	5034	protein_coding	signal regulatory protein beta 2 [Source:HGNC Symbol;Acc:HGNC:16247]	-
ENSG00000158106	102.834	68.606	104.956	304.516	244.851	210.094	92.1321	253.154	-1.4614	7.52961e-13	7.30087e-12	RHPN1	8	143368887	143384220	+	4172	protein_coding	rhophilin Rho GTPase binding protein 1 [Source:HGNC Symbol;Acc:HGNC:19973]	-
ENSG00000164283	2.26009	2.04794	0	76.5848	75.0501	62.053	1.43601	71.2293	-5.62753	7.57995e-13	7.34626e-12	ESM1	5	54977864	55022671	-	2695	protein_coding	endothelial cell specific molecule 1 [Source:HGNC Symbol;Acc:HGNC:3466]	-
ENSG00000113946	49.7219	53.2464	57.9447	0.911724	4.69063	4.43236	53.6377	3.3449	4.00422	7.94025e-13	7.6847e-12	CLDN16	3	190322541	190412143	+	3583	protein_coding	claudin 16 [Source:HGNC Symbol;Acc:HGNC:2037]	-
ENSG00000103888	339.013	208.89	314.869	104.848	101.318	123.22	287.591	109.795	1.3867	8.09122e-13	7.82353e-12	CEMIP	15	80779343	80951776	+	7621	protein_coding	cell migration inducing hyaluronidase 1 [Source:HGNC Symbol;Acc:HGNC:29213]	-
ENSG00000278948	150.296	162.811	149.782	57.4386	55.3494	43.4371	154.296	52.0751	1.56891	8.16108e-13	7.87641e-12	AL031587.5	22	37943050	37944898	+	1849	TEC	TEC	-
ENSG00000231205	51.982	84.9895	45.9184	165.934	220.46	196.797	60.9633	194.397	-1.66706	8.44765e-13	8.14542e-12	ZNF826P	19	20340269	20424969	-	6008	transcribed_unprocessed_pseudogene	zinc finger protein 826, pseudogene [Source:HGNC Symbol;Acc:HGNC:33875]	-
ENSG00000111666	105.094	113.661	79.8106	266.224	234.531	234.029	99.5217	244.928	-1.29786	8.47466e-13	8.16767e-12	CHPT1	12	101696947	101744140	+	6004	protein_coding	choline phosphotransferase 1 [Source:HGNC Symbol;Acc:HGNC:17852]	-
ENSG00000144401	66.6725	88.0614	68.8776	181.433	207.326	207.434	74.5372	198.731	-1.41155	8.65925e-13	8.33398e-12	METTL21A	2	207580631	207625928	-	6798	protein_coding	methyltransferase like 21A [Source:HGNC Symbol;Acc:HGNC:30476]	-
ENSG00000150281	177.417	168.955	168.368	66.5559	62.8544	62.053	171.58	63.8211	1.42658	8.66464e-13	8.3353e-12	CTF1	16	30896607	30903560	+	1664	protein_coding	cardiotrophin 1 [Source:HGNC Symbol;Acc:HGNC:2499]	-
ENSG00000127415	126.565	126.972	154.155	43.7628	42.2157	41.6642	135.897	42.5475	1.67522	1.04824e-12	1.00329e-11	IDUA	4	986997	1004506	+	4000	protein_coding	iduronidase, alpha-L- [Source:HGNC Symbol;Acc:HGNC:5391]	-
ENSG00000145687	195.497	150.524	195.7	73.8497	60.9782	46.983	180.574	60.6036	1.57502	1.07317e-12	1.02668e-11	SSBP2	5	81413021	81751797	-	11284	protein_coding	single stranded DNA binding protein 2 [Source:HGNC Symbol;Acc:HGNC:15831]	-
ENSG00000175482	372.914	298.999	276.604	148.611	109.761	146.268	316.172	134.88	1.22716	1.10898e-12	1.05947e-11	POLD4	11	67350777	67356972	-	3049	protein_coding	DNA polymerase delta 4, accessory subunit [Source:HGNC Symbol;Acc:HGNC:14106]	-
ENSG00000215039	254.26	330.742	236.152	116.701	121.018	106.377	273.718	114.699	1.25687	1.14297e-12	1.08944e-11	CD27-AS1	12	6439001	6451567	-	3411	processed_transcript	CD27 antisense RNA 1 [Source:HGNC Symbol;Acc:HGNC:43896]	-
ENSG00000105750	47.4618	43.0067	45.9184	132.2	151.976	140.949	45.4623	141.708	-1.64116	1.16312e-12	1.10712e-11	ZNF85	19	20923222	20950697	+	4668	protein_coding	zinc finger protein 85 [Source:HGNC Symbol;Acc:HGNC:13160]	zf-C2H2
ENSG00000129151	66.6725	75.7737	63.4112	0	0	0	68.6191	0	8.67704	1.17997e-12	1.12265e-11	BBOX1	11	27040725	27127809	+	2464	protein_coding	gamma-butyrobetaine hydroxylase 1 [Source:HGNC Symbol;Acc:HGNC:964]	-
ENSG00000233608	204.538	162.811	172.741	420.305	354.612	349.27	180.03	374.729	-1.05933	1.22143e-12	1.16055e-11	TWIST2	2	238848032	238910543	+	1878	protein_coding	twist family bHLH transcription factor 2 [Source:HGNC Symbol;Acc:HGNC:20670]	bHLH
ENSG00000143942	55.3721	31.7431	39.3586	134.935	149.162	140.949	42.1579	141.682	-1.75477	1.27562e-12	1.21088e-11	CHAC2	2	53767792	53775196	+	1321	protein_coding	ChaC cation transport regulator homolog 2 [Source:HGNC Symbol;Acc:HGNC:32363]	-
ENSG00000109881	81.3631	109.565	80.9039	230.666	234.531	213.64	90.6106	226.279	-1.31672	1.28264e-12	1.21698e-11	CCDC34	11	27330827	27363868	-	3733	protein_coding	coiled-coil domain containing 34 [Source:HGNC Symbol;Acc:HGNC:25079]	-
ENSG00000106399	197.757	333.814	209.913	589.886	536.608	527.451	247.161	551.315	-1.15441	1.56466e-12	1.47984e-11	RPA3	7	7636518	7718607	-	3232	protein_coding	replication protein A3 [Source:HGNC Symbol;Acc:HGNC:10291]	-
ENSG00000213160	42.9416	47.1026	37.1721	136.759	119.142	181.727	42.4054	145.876	-1.78192	1.58935e-12	1.5025e-11	KLHL23	2	169694488	169776989	+	5509	protein_coding	kelch like family member 23 [Source:HGNC Symbol;Acc:HGNC:27506]	-
ENSG00000145375	118.654	125.948	135.569	266.224	296.448	266.828	126.724	276.5	-1.12495	1.68527e-12	1.59029e-11	SPATA5	4	122923074	123319450	+	8247	protein_coding	spermatogenesis associated 5 [Source:HGNC Symbol;Acc:HGNC:18119]	-
ENSG00000196218	87.0133	91.1333	99.4899	25.5283	19.7006	18.6159	92.5455	21.2816	2.12103	1.75466e-12	1.65352e-11	RYR1	19	38433699	38587564	+	15965	protein_coding	ryanodine receptor 1 [Source:HGNC Symbol;Acc:HGNC:10483]	-
ENSG00000142623	57.6322	47.1026	50.2916	0.911724	3.7525	1.77294	51.6755	2.14572	4.59957	1.81212e-12	1.70457e-11	PADI1	1	17205126	17246005	+	4903	protein_coding	peptidyl arginine deiminase 1 [Source:HGNC Symbol;Acc:HGNC:18367]	-
ENSG00000023445	37.2914	37.8869	34.9855	126.73	125.709	118.787	36.7212	123.742	-1.75208	1.8251e-12	1.716e-11	BIRC3	11	102317450	102339403	+	7518	protein_coding	baculoviral IAP repeat containing 3 [Source:HGNC Symbol;Acc:HGNC:591]	-
ENSG00000170049	15.8206	14.3356	16.3994	74.7614	82.5551	87.7607	15.5185	81.6924	-2.39807	1.84737e-12	1.73616e-11	KCNAB3	17	7921859	7929803	-	4580	protein_coding	potassium voltage-gated channel subfamily A regulatory beta subunit 3 [Source:HGNC Symbol;Acc:HGNC:6230]	-
ENSG00000124134	19.2107	22.5273	25.1458	110.319	99.4413	84.2148	22.2946	97.9916	-2.13413	2.02957e-12	1.90051e-11	KCNS1	20	45092310	45101112	-	4538	protein_coding	potassium voltage-gated channel modifier subfamily S member 1 [Source:HGNC Symbol;Acc:HGNC:6300]	-
ENSG00000233864	85.8832	89.0853	99.4899	198.756	269.242	220.732	91.4862	229.577	-1.32676	2.04375e-12	1.91207e-11	TTTY15	Y	12662334	12692233	+	5284	lincRNA	testis-specific transcript, Y-linked 15 [Source:HGNC Symbol;Acc:HGNC:18567]	-
ENSG00000172059	227.139	289.783	293.003	126.73	113.513	116.128	269.975	118.79	1.18534	2.26846e-12	2.11754e-11	KLF11	2	10042849	10054836	+	4589	protein_coding	Kruppel like factor 11 [Source:HGNC Symbol;Acc:HGNC:11811]	zf-C2H2
ENSG00000255221	41.8116	91.1333	44.8251	0.911724	1.87625	1.77294	59.2567	1.52031	5.28861	2.2938e-12	2.14022e-11	CARD17	11	105092469	105101431	-	1232	protein_coding	caspase recruitment domain family member 17 [Source:HGNC Symbol;Acc:HGNC:33827]	-
ENSG00000143387	218.098	199.674	218.659	95.7311	73.1738	90.4201	212.144	86.4417	1.29365	2.30582e-12	2.15048e-11	CTSK	1	150796208	150808323	-	1887	protein_coding	cathepsin K [Source:HGNC Symbol;Acc:HGNC:2536]	-
ENSG00000214514	79.103	69.6299	42.6385	1.82345	4.69063	10.6377	63.7905	5.71725	3.47076	2.41893e-12	2.2489e-11	KRT42P	17	41626327	41640199	-	4512	transcribed_unprocessed_pseudogene	keratin 42 pseudogene [Source:HGNC Symbol;Acc:HGNC:27581]	-
ENSG00000128833	2.26009	6.14382	2.18659	52.88	65.6688	52.3018	3.53016	56.9502	-3.98811	2.54946e-12	2.36497e-11	MYO5C	15	52192322	52295798	-	10045	protein_coding	myosin VC [Source:HGNC Symbol;Acc:HGNC:7604]	-
ENSG00000175643	213.578	156.667	183.674	389.306	355.55	382.956	184.64	375.937	-1.02842	2.56234e-12	2.37585e-11	RMI2	16	11249619	11381662	+	3632	protein_coding	RecQ mediated genome instability 2 [Source:HGNC Symbol;Acc:HGNC:28349]	-
ENSG00000132423	106.224	137.212	98.3966	247.077	270.18	275.693	113.944	264.317	-1.21112	2.84794e-12	2.63831e-11	COQ3	6	99369400	99394204	-	1458	protein_coding	coenzyme Q3, methyltransferase [Source:HGNC Symbol;Acc:HGNC:18175]	-
ENSG00000203780	150.296	137.212	116.983	41.0276	45.9682	41.6642	134.83	42.8866	1.65285	2.96267e-12	2.74093e-11	FANK1	10	125896539	126009592	+	3384	protein_coding	fibronectin type III and ankyrin repeat domains 1 [Source:HGNC Symbol;Acc:HGNC:23527]	-
ENSG00000205309	97.1837	122.876	109.33	31.9104	32.8344	23.0483	109.797	29.2643	1.91107	2.97105e-12	2.74747e-11	NT5M	17	17303335	17347663	+	1961	protein_coding	5',3'-nucleotidase, mitochondrial [Source:HGNC Symbol;Acc:HGNC:15769]	-
ENSG00000161999	171.766	155.643	159.621	359.219	300.2	337.746	162.344	332.388	-1.03496	3.05837e-12	2.8257e-11	JMJD8	16	681671	684528	-	2627	protein_coding	jumonji domain containing 8 [Source:HGNC Symbol;Acc:HGNC:14148]	-
ENSG00000233493	250.869	387.06	198.98	111.23	91.9363	81.5554	278.97	94.9074	1.55747	3.10805e-12	2.86777e-11	TMEM238	19	55379245	55384598	-	1000	protein_coding	transmembrane protein 238 [Source:HGNC Symbol;Acc:HGNC:40042]	-
ENSG00000127423	59.8923	74.7498	40.4519	181.433	177.306	163.997	58.3647	174.245	-1.57421	3.4885e-12	3.21168e-11	AUNIP	1	25831913	25859458	-	2408	protein_coding	aurora kinase A and ninein interacting protein [Source:HGNC Symbol;Acc:HGNC:28363]	-
ENSG00000224592	55.3721	59.3902	43.7318	3.6469	6.56688	2.65942	52.8314	4.29106	3.63169	3.50305e-12	3.22365e-11	AL139158.2	1	38047314	38119025	+	684	lincRNA	novel transcript	-
ENSG00000136122	33.9013	41.9827	33.8922	126.73	119.142	123.22	36.5921	123.03	-1.74648	3.54449e-12	3.26034e-11	BORA	13	72727749	72756198	+	3189	protein_coding	bora, aurora kinase A activator [Source:HGNC Symbol;Acc:HGNC:24724]	-
ENSG00000101333	127.695	106.493	118.076	244.342	266.428	266.828	117.421	259.199	-1.14415	3.67881e-12	3.3809e-11	PLCB4	20	9068763	9481242	+	6900	protein_coding	phospholipase C beta 4 [Source:HGNC Symbol;Acc:HGNC:9059]	-
ENSG00000125246	150.296	164.859	111.516	36.469	44.0919	49.6424	142.224	43.4011	1.71247	3.77205e-12	3.46352e-11	CLYBL	13	99606669	99897134	+	7227	protein_coding	citrate lyase beta like [Source:HGNC Symbol;Acc:HGNC:18355]	-
ENSG00000065989	88.1433	62.4621	91.8368	216.99	201.697	201.229	80.8141	206.639	-1.35802	3.87631e-12	3.55454e-11	PDE4A	19	10416773	10469631	+	6646	protein_coding	phosphodiesterase 4A [Source:HGNC Symbol;Acc:HGNC:8780]	-
ENSG00000125998	120.915	119.804	122.449	34.6455	32.8344	42.5507	121.056	36.6769	1.72095	3.96684e-12	3.63275e-11	FAM83C	20	35285731	35292401	-	3145	protein_coding	family with sequence similarity 83 member C [Source:HGNC Symbol;Acc:HGNC:16121]	-
ENSG00000196550	12.4305	11.2637	10.933	74.7614	74.1119	64.7124	11.5424	71.1953	-2.62577	4.23162e-12	3.86841e-11	FAM72A	1	206186179	206204414	-	3783	protein_coding	family with sequence similarity 72 member A [Source:HGNC Symbol;Acc:HGNC:24044]	-
ENSG00000115596	72.3227	61.4382	57.9447	9.11724	12.1956	4.43236	63.9019	8.58175	2.9035	4.56679e-12	4.17113e-11	WNT6	2	218859821	218874233	+	1703	protein_coding	Wnt family member 6 [Source:HGNC Symbol;Acc:HGNC:12785]	-
ENSG00000171443	257.65	345.078	271.137	136.759	132.276	125.879	291.288	131.638	1.14763	4.78834e-12	4.36965e-11	ZNF524	19	55600022	55603138	+	1360	protein_coding	zinc finger protein 524 [Source:HGNC Symbol;Acc:HGNC:28322]	zf-C2H2
ENSG00000145283	236.179	204.794	233.965	98.4662	91.9363	101.944	224.979	97.4489	1.20565	4.86709e-12	4.43956e-11	SLC10A6	4	86823468	86849263	-	1502	protein_coding	solute carrier family 10 member 6 [Source:HGNC Symbol;Acc:HGNC:30603]	-
ENSG00000149679	93.7935	104.445	123.542	257.106	227.965	254.417	107.26	246.496	-1.20026	5.304e-12	4.83174e-11	CABLES2	20	62388632	62407285	-	3785	protein_coding	Cdk5 and Abl enzyme substrate 2 [Source:HGNC Symbol;Acc:HGNC:16143]	-
ENSG00000140025	58.7622	46.0786	47.0117	133.112	158.543	156.906	50.6175	149.52	-1.56516	6.1141e-12	5.54297e-11	EFCAB11	14	89794669	89954777	-	8302	protein_coding	EF-hand calcium binding domain 11 [Source:HGNC Symbol;Acc:HGNC:20357]	-
ENSG00000170537	339.013	297.975	320.336	134.935	146.348	176.408	319.108	152.564	1.06313	6.49959e-12	5.87962e-11	TMC7	16	18983934	19063942	+	5638	protein_coding	transmembrane channel like 7 [Source:HGNC Symbol;Acc:HGNC:23000]	-
ENSG00000249790	159.336	192.506	156.341	70.2028	62.8544	52.3018	169.395	61.7864	1.45712	7.07419e-12	6.37998e-11	AC092490.1	12	8788257	8795789	+	2279	lincRNA	novel transcript	-
ENSG00000198208	1.13004	3.07191	4.37318	62.909	50.6588	48.756	2.85838	54.1079	-4.23275	7.15574e-12	6.44792e-11	RPS6KL1	14	74903954	74923396	-	7617	protein_coding	ribosomal protein S6 kinase like 1 [Source:HGNC Symbol;Acc:HGNC:20222]	-
ENSG00000171403	119.785	83.9655	77.624	12.7641	15.9481	27.4806	93.7913	18.731	2.31864	7.79738e-12	7.01696e-11	KRT9	17	41565841	41572058	-	2290	protein_coding	keratin 9 [Source:HGNC Symbol;Acc:HGNC:6447]	-
ENSG00000099958	4.52017	0	3.27989	58.3504	51.5969	53.1883	2.60002	54.3785	-4.42362	7.93361e-12	7.13647e-11	DERL3	22	23834503	23839128	-	3796	protein_coding	derlin 3 [Source:HGNC Symbol;Acc:HGNC:14236]	-
ENSG00000168350	62.1523	44.0307	44.8251	3.6469	4.69063	3.54589	50.3361	3.96114	3.66891	8.22323e-12	7.38101e-11	DEGS2	14	100143957	100160163	-	4466	protein_coding	delta 4-desaturase, sphingolipid 2 [Source:HGNC Symbol;Acc:HGNC:20113]	-
ENSG00000247271	195.497	221.177	201.166	93.9076	79.7407	86.8742	205.947	86.8409	1.24615	8.3567e-12	7.49434e-11	ZBED5-AS1	11	10858259	10906802	+	1995	antisense	ZBED5 antisense RNA 1 [Source:HGNC Symbol;Acc:HGNC:48646]	-
ENSG00000258791	37.2914	57.3423	54.6648	3.6469	0	2.65942	49.7662	2.1021	4.55286	8.5888e-12	7.69253e-11	LINC00520	14	55781132	55796731	-	3482	lincRNA	long intergenic non-protein coding RNA 520 [Source:HGNC Symbol;Acc:HGNC:19843]	-
ENSG00000250899	19.2107	20.4794	24.0525	93.9076	77.8644	107.263	21.2475	93.0117	-2.13075	9.17844e-12	8.19943e-11	AC125807.2	12	3041437	3044950	+	3514	lincRNA	novel transcript	-
ENSG00000196371	70.0626	48.1266	52.4782	159.552	168.863	152.473	56.8891	160.296	-1.49814	1.03141e-11	9.19421e-11	FUT4	11	94543840	94549898	+	6059	protein_coding	fucosyltransferase 4 [Source:HGNC Symbol;Acc:HGNC:4015]	-
ENSG00000162711	14.6906	22.5273	5.46648	74.7614	90.9982	85.9878	14.2281	83.9158	-2.54999	1.05313e-11	9.37977e-11	NLRP3	1	247416156	247449108	+	4757	protein_coding	NLR family pyrin domain containing 3 [Source:HGNC Symbol;Acc:HGNC:16400]	-
ENSG00000154856	54.242	46.0786	54.6648	5.47035	5.62876	4.43236	51.6618	5.17715	3.32016	1.05824e-11	9.42128e-11	APCDD1	18	10454628	10489948	+	5943	protein_coding	APC down-regulated 1 [Source:HGNC Symbol;Acc:HGNC:15718]	-
ENSG00000262454	106.224	146.428	137.755	46.4979	40.3394	29.2536	130.136	38.697	1.75278	1.06722e-11	9.49711e-11	MIR193BHG	16	14301389	14331067	+	6049	lincRNA	MIR193B host gene [Source:HGNC Symbol;Acc:HGNC:51945]	-
ENSG00000187193	296.071	508.913	273.324	151.346	126.647	132.084	359.436	136.693	1.39633	1.12106e-11	9.96771e-11	MT1X	16	56682424	56684196	+	1773	protein_coding	metallothionein 1X [Source:HGNC Symbol;Acc:HGNC:7405]	-
ENSG00000006468	59.8923	58.3663	50.2916	144.964	163.234	156.906	56.1834	155.035	-1.46417	1.26002e-11	1.1146e-10	ETV1	7	13891228	13991425	-	9616	protein_coding	ETS variant 1 [Source:HGNC Symbol;Acc:HGNC:3490]	ETS
ENSG00000089116	97.1837	91.1333	115.889	24.6166	24.3913	31.913	101.402	26.9736	1.90804	1.46833e-11	1.29172e-10	LHX5	12	113462034	113472280	-	3125	protein_coding	LIM homeobox 5 [Source:HGNC Symbol;Acc:HGNC:14216]	Homeobox
ENSG00000197279	35.0313	60.4142	53.5715	166.846	157.605	133.857	49.6723	152.769	-1.6154	1.47945e-11	1.29985e-10	ZNF165	6	28080975	28089563	+	2107	protein_coding	zinc finger protein 165 [Source:HGNC Symbol;Acc:HGNC:12953]	zf-C2H2
ENSG00000265107	55.3721	61.4382	65.5977	8.20552	11.2575	7.97825	60.8027	9.14709	2.73621	1.58948e-11	1.39299e-10	GJA5	1	147756199	147773362	-	3292	protein_coding	gap junction protein alpha 5 [Source:HGNC Symbol;Acc:HGNC:4279]	-
ENSG00000005001	127.695	137.212	143.222	56.5269	29.0819	38.1183	136.043	41.2424	1.72087	1.6055e-11	1.40644e-10	PRSS22	16	2852727	2858170	-	2387	protein_coding	serine protease 22 [Source:HGNC Symbol;Acc:HGNC:14368]	-
ENSG00000184113	57.6322	64.5101	53.5715	10.029	6.56688	7.97825	58.5712	8.19137	2.83728	1.64949e-11	1.44436e-10	CLDN5	22	19523024	19527545	-	3429	protein_coding	claudin 5 [Source:HGNC Symbol;Acc:HGNC:2047]	-
ENSG00000183048	71.1927	60.4142	57.9447	196.021	166.048	150.7	63.1839	170.923	-1.43699	1.74221e-11	1.52234e-10	SLC25A10	17	81712236	81721016	+	2621	protein_coding	solute carrier family 25 member 10 [Source:HGNC Symbol;Acc:HGNC:10980]	-
ENSG00000164120	51.982	52.2224	44.8251	6.38207	3.7525	0	49.6765	3.37819	3.88967	1.74613e-11	1.52513e-10	HPGD	4	174490177	174523154	-	5529	protein_coding	15-hydroxyprostaglandin dehydrogenase [Source:HGNC Symbol;Acc:HGNC:5154]	-
ENSG00000214357	37.2914	45.0547	38.2654	124.906	115.389	141.836	40.2038	127.377	-1.66183	1.75551e-11	1.53268e-10	NEURL1B	5	172641266	172691540	+	6424	protein_coding	neuralized E3 ubiquitin protein ligase 1B [Source:HGNC Symbol;Acc:HGNC:35422]	-
ENSG00000134243	299.461	223.225	203.353	101.201	95.6888	104.604	242.013	100.498	1.26632	1.75865e-11	1.53478e-10	SORT1	1	109309568	109397951	-	9160	protein_coding	sortilin 1 [Source:HGNC Symbol;Acc:HGNC:11186]	-
ENSG00000109906	108.484	83.9655	85.2771	0.911724	0	0	92.5756	0.303908	8.14551	1.76357e-11	1.53842e-10	ZBTB16	11	114059593	114250676	+	6372	protein_coding	zinc finger and BTB domain containing 16 [Source:HGNC Symbol;Acc:HGNC:12930]	ZBTB
ENSG00000240563	46.3317	50.1745	39.3586	147.699	125.709	134.744	45.2883	136.051	-1.58565	1.85812e-11	1.61954e-10	L1TD1	1	62194831	62212328	+	3849	protein_coding	LINE1 type transposase domain containing 1 [Source:HGNC Symbol;Acc:HGNC:25595]	-
ENSG00000127084	57.6322	59.3902	42.6385	2.73517	3.7525	8.86472	53.2203	5.11747	3.36973	2.12464e-11	1.84488e-10	FGD3	9	92947451	93036236	+	5890	protein_coding	FYVE, RhoGEF and PH domain containing 3 [Source:HGNC Symbol;Acc:HGNC:16027]	-
ENSG00000168899	220.358	262.136	244.898	123.083	106.008	96.6254	242.464	108.572	1.16043	2.16512e-11	1.87924e-10	VAMP5	2	85584408	85593412	+	819	protein_coding	vesicle associated membrane protein 5 [Source:HGNC Symbol;Acc:HGNC:12646]	-
ENSG00000269741	99.4437	81.9176	85.2771	24.6166	23.4531	14.1836	88.8795	20.7511	2.10077	2.18557e-11	1.8962e-10	AC011473.4	19	50996018	51009581	-	1933	protein_coding	novel transcript	-
ENSG00000198169	229.399	252.92	216.473	93.9076	99.4413	117.014	232.931	103.454	1.17074	2.2429e-11	1.94431e-10	ZNF251	8	144720907	144756417	-	4939	protein_coding	zinc finger protein 251 [Source:HGNC Symbol;Acc:HGNC:13045]	zf-C2H2
ENSG00000225520	42.9416	44.0307	52.4782	1.82345	2.81438	0.886472	46.4835	1.84143	4.66986	2.2608e-11	1.95902e-10	TTTY16	Y	7699357	7701247	-	192	lincRNA	testis-specific transcript, Y-linked 16 [Source:HGNC Symbol;Acc:HGNC:18840]	-
ENSG00000140379	2.26009	8.19176	2.18659	60.1738	49.7207	52.3018	4.21281	54.0654	-3.65399	2.30354e-11	1.99521e-10	BCL2A1	15	79960889	79971446	-	1089	protein_coding	BCL2 related protein A1 [Source:HGNC Symbol;Acc:HGNC:991]	-
ENSG00000215030	992.177	1257.43	885.57	628.178	540.36	395.366	1045.06	521.302	1.00425	2.36355e-11	2.04463e-10	RPL13P12	17	17383377	17384012	-	636	processed_pseudogene	ribosomal protein L13 pseudogene 12 [Source:HGNC Symbol;Acc:HGNC:35701]	-
ENSG00000075303	161.596	139.26	139.942	256.195	377.127	341.292	146.933	324.871	-1.1455	2.48729e-11	2.14811e-10	SLC25A40	7	87833568	87876357	-	5081	protein_coding	solute carrier family 25 member 40 [Source:HGNC Symbol;Acc:HGNC:29680]	-
ENSG00000269834	110.744	166.907	159.621	44.6745	45.9682	53.1883	145.757	47.9437	1.60507	2.50198e-11	2.159e-10	ZNF528-AS1	19	52388842	52397766	-	4160	processed_transcript	ZNF528 antisense RNA 1 [Source:HGNC Symbol;Acc:HGNC:51305]	-
ENSG00000189308	162.726	138.236	133.382	262.577	334.911	322.676	144.781	306.721	-1.08414	2.60077e-11	2.24153e-10	LIN54	4	82909973	83012926	-	6768	protein_coding	lin-54 DREAM MuvB core complex component [Source:HGNC Symbol;Acc:HGNC:25397]	-
ENSG00000254901	67.8026	51.1985	72.1575	176.875	188.563	150.7	63.7195	172.046	-1.43553	2.62807e-11	2.26216e-10	BORCS8	19	19176903	19192591	-	5372	protein_coding	BLOC-1 related complex subunit 8 [Source:HGNC Symbol;Acc:HGNC:37247]	-
ENSG00000159527	39.5515	43.0067	54.6648	1.82345	2.81438	1.77294	45.741	2.13692	4.42542	2.65514e-11	2.28168e-10	PGLYRP3	1	153297862	153310718	-	1173	protein_coding	peptidoglycan recognition protein 3 [Source:HGNC Symbol;Acc:HGNC:30014]	-
ENSG00000280123	24.8609	21.5034	29.519	105.76	106.008	84.2148	25.2944	98.661	-1.96546	2.66275e-11	2.28728e-10	AC023632.6	8	94427712	94429888	-	2177	TEC	TEC	-
ENSG00000185015	44.0717	62.4621	61.2246	154.081	169.801	145.381	55.9195	156.421	-1.48038	2.87847e-11	2.46748e-10	CA13	8	85220587	85284073	+	5528	protein_coding	carbonic anhydrase 13 [Source:HGNC Symbol;Acc:HGNC:14914]	-
ENSG00000184148	53.112	34.815	62.3179	2.73517	0	6.2053	50.0816	2.98016	4.04826	3.22199e-11	2.75174e-10	SPRR4	1	152970666	152972574	+	733	protein_coding	small proline rich protein 4 [Source:HGNC Symbol;Acc:HGNC:23173]	-
ENSG00000186777	25.991	21.5034	26.2391	91.1724	100.379	92.1931	24.5778	94.5817	-1.94665	3.25075e-11	2.77516e-10	ZNF732	4	270675	305321	-	2193	protein_coding	zinc finger protein 732 [Source:HGNC Symbol;Acc:HGNC:37138]	zf-C2H2
ENSG00000104205	124.305	162.811	126.822	276.252	284.252	317.357	137.979	292.621	-1.08224	3.39092e-11	2.88652e-10	SGK3	8	66667596	66862022	+	6474	protein_coding	serum/glucocorticoid regulated kinase family member 3 [Source:HGNC Symbol;Acc:HGNC:10812]	-
ENSG00000075340	6.78026	12.2876	15.3061	66.5559	67.5451	71.8042	11.458	68.6351	-2.57726	3.44129e-11	2.927e-10	ADD2	2	70607618	70768225	-	12673	protein_coding	adducin 2 [Source:HGNC Symbol;Acc:HGNC:244]	-
ENSG00000221887	7.9103	2.04794	6.55977	57.4386	44.0919	67.3719	5.506	56.3008	-3.37432	3.58791e-11	3.04672e-10	HMSD	18	63949301	63981774	+	2920	protein_coding	histocompatibility minor serpin domain containing [Source:HGNC Symbol;Acc:HGNC:23037]	-
ENSG00000075213	23.7309	29.6951	22.9592	89.349	94.7507	108.15	25.4617	97.4164	-1.93279	3.69451e-11	3.1334e-10	SEMA3A	7	83955777	84492724	-	9371	protein_coding	semaphorin 3A [Source:HGNC Symbol;Acc:HGNC:10723]	-
ENSG00000183137	140.125	139.26	132.289	254.371	303.015	289.876	137.225	282.421	-1.04112	3.95836e-11	3.34855e-10	CEP57L1	6	109095110	109163932	+	6432	protein_coding	centrosomal protein 57 like 1 [Source:HGNC Symbol;Acc:HGNC:21561]	-
ENSG00000182866	1.13004	2.04794	3.27989	57.4386	44.0919	50.5289	2.15262	50.6865	-4.55274	3.95948e-11	3.34855e-10	LCK	1	32251239	32286165	+	3339	protein_coding	LCK proto-oncogene, Src family tyrosine kinase [Source:HGNC Symbol;Acc:HGNC:6524]	-
ENSG00000135454	4.52017	2.04794	5.46648	56.5269	50.6588	45.2101	4.01153	50.7986	-3.67597	4.55508e-11	3.83044e-10	B4GALNT1	12	57623410	57633355	-	8003	protein_coding	beta-1,4-N-acetyl-galactosaminyltransferase 1 [Source:HGNC Symbol;Acc:HGNC:4117]	-
ENSG00000279806	283.641	267.256	325.802	151.346	147.286	127.652	292.233	142.095	1.0404	4.81748e-11	4.04291e-10	AC018629.1	17	40473554	40475289	-	1736	TEC	TEC	-
ENSG00000171960	170.636	274.424	190.233	475.92	414.652	434.371	211.765	441.648	-1.05739	4.8441e-11	4.06361e-10	PPIH	1	42658425	42676758	+	1444	protein_coding	peptidylprolyl isomerase H [Source:HGNC Symbol;Acc:HGNC:14651]	-
ENSG00000177614	65.5425	49.1505	87.4637	15.4993	7.50501	7.09178	67.3856	10.032	2.74666	4.85337e-11	4.06974e-10	PGBD5	1	230314482	230426371	-	11304	protein_coding	piggyBac transposable element derived 5 [Source:HGNC Symbol;Acc:HGNC:19405]	-
ENSG00000243943	126.565	132.092	153.061	291.752	278.623	271.26	137.239	280.545	-1.03144	5.00385e-11	4.19423e-10	ZNF512	2	27582969	27623215	+	4398	protein_coding	zinc finger protein 512 [Source:HGNC Symbol;Acc:HGNC:29380]	zf-C2H2
ENSG00000226278	160.466	248.825	170.554	84.7904	54.4113	64.7124	193.282	67.9714	1.50894	5.14828e-11	4.30834e-10	PSPHP1	7	55764797	55773288	+	261	unprocessed_pseudogene	phosphoserine phosphatase pseudogene 1 [Source:HGNC Symbol;Acc:HGNC:9578]	-
ENSG00000133985	87.0133	79.8696	64.5045	12.7641	14.0719	21.2753	77.1291	16.0371	2.26242	5.35118e-11	4.47274e-10	TTC9	14	70641787	70675360	+	5217	protein_coding	tetratricopeptide repeat domain 9 [Source:HGNC Symbol;Acc:HGNC:20267]	-
ENSG00000164825	42.9416	83.9655	26.2391	1.82345	2.81438	1.77294	51.0487	2.13692	4.58659	5.36647e-11	4.48371e-10	DEFB1	8	6870575	6878022	-	478	protein_coding	defensin beta 1 [Source:HGNC Symbol;Acc:HGNC:2766]	-
ENSG00000275004	10.1704	11.2637	12.0263	67.4676	61.9163	66.4854	11.1534	65.2898	-2.54847	5.37309e-11	4.48743e-10	ZNF280B	22	22484421	22509154	-	5723	protein_coding	zinc finger protein 280B [Source:HGNC Symbol;Acc:HGNC:23022]	-
ENSG00000203709	179.677	191.482	200.073	59.2621	95.6888	68.2583	190.411	74.4031	1.35771	5.94732e-11	4.95507e-10	MIR29B2CHG	1	207801518	207879096	-	16425	lincRNA	MIR29B2 and MIR29C host gene [Source:HGNC Symbol;Acc:HGNC:32018]	-
ENSG00000197696	40.6815	64.5101	43.7318	156.817	148.224	133.857	49.6411	146.299	-1.55357	6.26786e-11	5.21377e-10	NMB	15	84655129	84658563	-	1022	protein_coding	neuromedin B [Source:HGNC Symbol;Acc:HGNC:7842]	-
ENSG00000176194	12.4305	12.2876	5.46648	68.3793	69.4213	56.7342	10.0615	64.8449	-2.68555	6.27451e-11	5.21721e-10	CIDEA	18	12254319	12277595	+	1852	protein_coding	cell death-inducing DFFA-like effector a [Source:HGNC Symbol;Acc:HGNC:1976]	-
ENSG00000116883	242.959	210.938	285.35	103.937	122.894	102.831	246.416	109.887	1.16501	6.95266e-11	5.76493e-10	AL591845.1	1	36323734	36329221	+	1838	antisense	novel transcript, antisense to EVA1B	-
ENSG00000172382	71.1927	45.0547	55.7581	8.20552	8.44313	7.97825	57.3351	8.20897	2.80234	7.83573e-11	6.46688e-10	PRSS27	16	2712418	2720551	-	5921	protein_coding	serine protease 27 [Source:HGNC Symbol;Acc:HGNC:15475]	-
ENSG00000148288	12.4305	22.5273	20.7726	85.7021	76.9263	85.1013	18.5768	82.5766	-2.14574	8.71945e-11	7.16983e-10	GBGT1	9	133152948	133163945	-	4032	protein_coding	globoside alpha-1,3-N-acetylgalactosaminyltransferase 1 (FORS blood group) [Source:HGNC Symbol;Acc:HGNC:20460]	-
ENSG00000158296	287.031	276.472	347.668	153.17	156.667	142.722	303.724	150.853	1.0096	9.05052e-11	7.43323e-10	SLC13A3	20	46557823	46684467	-	6055	protein_coding	solute carrier family 13 member 3 [Source:HGNC Symbol;Acc:HGNC:14430]	-
ENSG00000237499	140.125	130.044	119.169	45.5862	41.2775	49.6424	129.78	45.5021	1.51064	9.82712e-11	8.06469e-10	AL357060.1	6	137823673	137868233	-	4088	antisense	uncharacterized LOC100130476 [Source:NCBI gene;Acc:100130476]	-
ENSG00000188613	168.376	173.051	148.688	69.2911	63.7926	63.826	163.372	65.6365	1.31592	9.9694e-11	8.17821e-10	NANOS1	10	119029716	119033732	+	4017	protein_coding	nanos C2HC-type zinc finger 1 [Source:HGNC Symbol;Acc:HGNC:23044]	-
ENSG00000067992	53.112	54.2704	77.624	154.081	168.863	167.543	61.6688	163.496	-1.4073	1.02955e-10	8.4357e-10	PDK3	X	24465221	24541862	+	4951	protein_coding	pyruvate dehydrogenase kinase 3 [Source:HGNC Symbol;Acc:HGNC:8811]	-
ENSG00000168237	33.9013	58.3663	40.4519	153.17	134.152	123.22	44.2398	136.847	-1.6228	1.03655e-10	8.48972e-10	GLYCTK	3	52287089	52293476	+	3013	protein_coding	glycerate kinase [Source:HGNC Symbol;Acc:HGNC:24247]	-
ENSG00000205593	88.1433	100.349	111.516	28.2635	22.515	33.6859	100.003	28.1548	1.8265	1.03774e-10	8.4961e-10	DENND6B	22	50309030	50327060	-	5935	protein_coding	DENN domain containing 6B [Source:HGNC Symbol;Acc:HGNC:32690]	-
ENSG00000159753	4.52017	10.2397	4.37318	54.7035	57.2257	52.3018	6.37768	54.7437	-3.08483	1.08841e-10	8.90049e-10	CARMIL2	16	67644919	67657569	+	7699	protein_coding	capping protein regulator and myosin 1 linker 2 [Source:HGNC Symbol;Acc:HGNC:27089]	-
ENSG00000276672	4.52017	1.02397	5.46648	46.4979	62.8544	40.7777	3.67021	50.0434	-3.7888	1.14067e-10	9.31678e-10	AL161891.1	13	33846190	33850825	+	4636	sense_intronic	novel transcript, sense intronic to RFC3	-
ENSG00000173947	87.0133	69.6299	85.2771	19.1462	21.5769	17.7294	80.6401	19.4842	2.04928	1.15646e-10	9.43465e-10	PIFO	1	111346288	111353013	+	4261	protein_coding	primary cilia formation [Source:HGNC Symbol;Acc:HGNC:27009]	-
ENSG00000175305	27.121	9.21573	13.1195	74.7614	90.9982	81.5554	16.4854	82.4383	-2.33497	1.24179e-10	1.00912e-09	CCNE2	8	94879770	94896678	-	4397	protein_coding	cyclin E2 [Source:HGNC Symbol;Acc:HGNC:1590]	-
ENSG00000071282	21.4708	36.8629	30.6123	105.76	101.318	105.49	29.6487	104.189	-1.8071	1.2788e-10	1.03797e-09	LMCD1	3	8501707	8574673	+	9130	protein_coding	LIM and cysteine rich domains 1 [Source:HGNC Symbol;Acc:HGNC:6633]	-
ENSG00000186648	53.112	45.0547	48.105	2.73517	8.44313	4.43236	48.7572	5.20356	3.2344	1.32112e-10	1.07023e-09	CARMIL3	14	24052000	24069728	+	6665	protein_coding	capping protein regulator and myosin 1 linker 3 [Source:HGNC Symbol;Acc:HGNC:20272]	-
ENSG00000175322	18.0807	17.4075	25.1458	70.2028	105.07	85.1013	20.2113	86.7914	-2.10325	1.55762e-10	1.25498e-09	ZNF519	18	14057457	14132490	-	15787	protein_coding	zinc finger protein 519 [Source:HGNC Symbol;Acc:HGNC:30574]	zf-C2H2
ENSG00000106948	94.9236	65.534	86.3704	200.579	188.563	195.024	82.276	194.722	-1.24664	1.74715e-10	1.40224e-09	AKNA	9	114334156	114394405	-	10601	protein_coding	AT-hook transcription factor [Source:HGNC Symbol;Acc:HGNC:24108]	-
ENSG00000155918	66.6725	91.1333	72.1575	19.1462	19.7006	12.4106	76.6544	17.0858	2.17034	1.8328e-10	1.46871e-09	RAET1L	6	150018334	150025532	-	1346	protein_coding	retinoic acid early transcript 1L [Source:HGNC Symbol;Acc:HGNC:16798]	-
ENSG00000284485	111.874	145.404	148.688	57.4386	36.5869	41.6642	135.322	45.2299	1.58149	1.87517e-10	1.50093e-09	MIR205	1	209432133	209432242	+	110	miRNA	microRNA 205 [Source:HGNC Symbol;Acc:HGNC:31583]	-
ENSG00000124126	5.65021	1.02397	0	40.1159	45.9682	60.2801	2.22473	48.788	-4.49021	1.94467e-10	1.55536e-09	PREX1	20	48624252	48827883	-	7393	protein_coding	phosphatidylinositol-3,4,5-trisphosphate dependent Rac exchange factor 1 [Source:HGNC Symbol;Acc:HGNC:32594]	-
ENSG00000138587	4.52017	4.09588	6.55977	57.4386	45.9682	46.0965	5.05861	49.8344	-3.30356	1.95189e-10	1.55994e-09	MNS1	15	56421544	56465137	-	2504	protein_coding	meiosis specific nuclear structural 1 [Source:HGNC Symbol;Acc:HGNC:29636]	-
ENSG00000158062	117.524	86.0134	112.609	258.93	234.531	211.867	105.382	235.109	-1.16034	1.95491e-10	1.56175e-09	UBXN11	1	26281328	26318363	-	4704	protein_coding	UBX domain protein 11 [Source:HGNC Symbol;Acc:HGNC:30600]	-
ENSG00000225968	59.8923	60.4142	84.1838	13.6759	13.1338	14.1836	68.1634	13.6644	2.31764	2.03343e-10	1.62261e-09	ELFN1	7	1688119	1747954	+	3845	protein_coding	extracellular leucine rich repeat and fibronectin type III domain containing 1 [Source:HGNC Symbol;Acc:HGNC:33154]	-
ENSG00000147231	94.9236	101.373	100.583	190.55	234.531	232.256	98.9599	219.112	-1.14614	2.16839e-10	1.72566e-09	CXorf57	X	106611930	106679442	+	4853	protein_coding	chromosome X open reading frame 57 [Source:HGNC Symbol;Acc:HGNC:25486]	-
ENSG00000111405	77.9729	29.6951	43.7318	3.6469	5.62876	3.54589	50.4666	4.27385	3.56258	2.25133e-10	1.78892e-09	ENDOU	12	47709734	47725567	-	2679	protein_coding	endonuclease, poly(U) specific [Source:HGNC Symbol;Acc:HGNC:14369]	-
ENSG00000196542	49.7219	47.1026	32.7989	0	1.87625	2.65942	43.2078	1.51189	4.83093	2.28665e-10	1.81441e-09	SPTSSB	3	161344792	161372880	-	3745	protein_coding	serine palmitoyltransferase small subunit B [Source:HGNC Symbol;Acc:HGNC:24045]	-
ENSG00000109472	193.237	234.489	189.14	77.4966	87.2457	101.944	205.622	88.8955	1.2102	2.28689e-10	1.81441e-09	CPE	4	165361194	165498320	+	2958	protein_coding	carboxypeptidase E [Source:HGNC Symbol;Acc:HGNC:2303]	-
ENSG00000120949	6.78026	14.3356	9.83966	63.8207	65.6688	57.6207	10.3185	62.3701	-2.5841	2.31242e-10	1.83396e-09	TNFRSF8	1	12063377	12144207	+	3738	protein_coding	TNF receptor superfamily member 8 [Source:HGNC Symbol;Acc:HGNC:11923]	-
ENSG00000159374	19.2107	27.6472	18.586	103.937	65.6688	109.036	21.8146	92.8805	-2.08595	2.32071e-10	1.83913e-09	M1AP	2	74557883	74648338	-	3000	protein_coding	meiosis 1 associated protein [Source:HGNC Symbol;Acc:HGNC:25183]	-
ENSG00000121552	4341.62	7783.19	4023.33	1338.41	1104.17	1304.89	5382.71	1249.16	2.1074	2.45574e-10	1.94392e-09	CSTA	3	122325244	122341972	+	1373	protein_coding	cystatin A [Source:HGNC Symbol;Acc:HGNC:2481]	-
ENSG00000273151	211.318	215.034	212.099	82.0552	97.5651	109.923	212.817	96.5143	1.14027	2.60721e-10	2.05676e-09	AC073957.3	7	879790	886547	-	6758	antisense	novel transcript, antisense to GET4	-
ENSG00000105523	103.964	83.9655	104.956	30.0869	30.9582	24.8212	97.6286	28.6221	1.77026	2.62845e-10	2.07195e-09	FAM83E	19	48600810	48614854	-	2529	protein_coding	family with sequence similarity 83 member E [Source:HGNC Symbol;Acc:HGNC:25972]	-
ENSG00000180638	64.4124	60.4142	55.7581	13.6759	11.2575	4.43236	60.1949	9.78858	2.62572	2.72428e-10	2.14342e-09	SLC47A2	17	19678288	19718979	-	6691	protein_coding	solute carrier family 47 member 2 [Source:HGNC Symbol;Acc:HGNC:26439]	-
ENSG00000118322	56.5021	45.0547	45.9184	0.911724	0.938126	0.886472	49.1584	0.912107	5.75179	2.77216e-10	2.17944e-09	ATP10B	5	160563120	160852214	-	11310	protein_coding	ATPase phospholipid transporting 10B (putative) [Source:HGNC Symbol;Acc:HGNC:13543]	-
ENSG00000184060	51.982	41.9827	41.5452	6.38207	4.69063	0.886472	45.17	3.98639	3.51046	2.93595e-10	2.30212e-09	ADAP2	17	30906344	30959322	+	3750	protein_coding	ArfGAP with dual PH domains 2 [Source:HGNC Symbol;Acc:HGNC:16487]	-
ENSG00000082497	59.8923	24.5753	53.5715	134.023	146.348	159.565	46.013	146.645	-1.68007	3.00302e-10	2.35293e-09	SERTAD4	1	210232799	210246631	+	5467	protein_coding	SERTA domain containing 4 [Source:HGNC Symbol;Acc:HGNC:25236]	-
ENSG00000182568	274.6	230.393	260.204	114.877	136.966	120.56	255.066	124.135	1.0386	3.22544e-10	2.51771e-09	SATB1	3	18345387	18445588	-	13409	protein_coding	SATB homeobox 1 [Source:HGNC Symbol;Acc:HGNC:10541]	CUT
ENSG00000163006	58.7622	64.5101	50.2916	138.582	167.925	147.154	57.8546	151.22	-1.38423	3.31411e-10	2.58401e-09	CCDC138	2	108786757	108885477	+	5796	protein_coding	coiled-coil domain containing 138 [Source:HGNC Symbol;Acc:HGNC:26531]	-
ENSG00000105141	44.0717	27.6472	59.038	0.911724	0.938126	2.65942	43.5856	1.50309	4.8428	3.51252e-10	2.7346e-09	CASP14	19	15049384	15058293	+	3497	protein_coding	caspase 14 [Source:HGNC Symbol;Acc:HGNC:1502]	-
ENSG00000112208	70.0626	57.3423	62.3179	152.258	160.42	157.792	63.2409	156.823	-1.3123	3.56681e-10	2.77498e-09	BAG2	6	57172326	57189833	+	6651	protein_coding	BCL2 associated athanogene 2 [Source:HGNC Symbol;Acc:HGNC:938]	-
ENSG00000276180	77.9729	80.8936	84.1838	19.1462	23.4531	21.2753	81.0168	21.2916	1.9288	3.56704e-10	2.77498e-09	HIST1H4I	6	27138588	27139881	+	1294	protein_coding	histone cluster 1 H4 family member i [Source:HGNC Symbol;Acc:HGNC:4793]	-
ENSG00000258634	329.972	248.825	319.242	146.788	135.09	159.565	299.346	147.148	1.02247	3.60454e-10	2.8031e-09	AL160006.1	1	110058340	110062555	+	4216	antisense	novel transcript, antisense to ALX3	-
ENSG00000132561	133.345	141.308	134.475	53.7917	57.2257	37.2318	136.376	49.4164	1.46714	3.79859e-10	2.95179e-09	MATN2	8	97868840	98036716	+	6933	protein_coding	matrilin 2 [Source:HGNC Symbol;Acc:HGNC:6908]	-
ENSG00000173210	493.829	288.759	406.706	179.61	164.172	204.775	396.431	182.852	1.11421	3.99093e-10	3.09662e-09	ABLIM3	5	149141483	149260542	+	7225	protein_coding	actin binding LIM protein family member 3 [Source:HGNC Symbol;Acc:HGNC:29132]	-
ENSG00000137821	80.233	95.2292	115.889	216.079	207.326	226.05	97.1172	216.485	-1.15584	4.3447e-10	3.36358e-09	LRRC49	15	70853239	71053657	+	9991	protein_coding	leucine rich repeat containing 49 [Source:HGNC Symbol;Acc:HGNC:25965]	-
ENSG00000226950	107.354	108.541	132.289	278.076	213.893	256.19	116.061	249.386	-1.10423	4.39982e-10	3.40498e-09	DANCR	4	52712404	52720351	+	2285	processed_transcript	differentiation antagonizing non-protein coding RNA [Source:HGNC Symbol;Acc:HGNC:28964]	-
ENSG00000167968	62.1523	58.3663	54.6648	14.5876	8.44313	7.09178	58.3945	10.0408	2.54077	4.75669e-10	3.6675e-09	DNASE1L2	16	2235816	2238711	+	2194	protein_coding	deoxyribonuclease 1 like 2 [Source:HGNC Symbol;Acc:HGNC:2958]	-
ENSG00000170044	123.175	105.469	127.916	42.851	42.2157	39.8912	118.853	41.6526	1.51201	4.94218e-10	3.80347e-09	ZPLD1	3	102099244	102479841	+	5130	protein_coding	zona pellucida like domain containing 1 [Source:HGNC Symbol;Acc:HGNC:27022]	-
ENSG00000265982	89.2734	92.1573	91.8368	30.0869	28.1438	20.3889	91.0892	26.2065	1.79947	5.02539e-10	3.86464e-09	AC103810.3	17	64778842	64778937	-	96	unprocessed_pseudogene	Rho GTPase-activating protein 27-like protein pseudogene	-
ENSG00000127954	41.8116	40.9588	43.7318	0	0.938126	2.65942	42.1674	1.19918	5.11871	5.39261e-10	4.13938e-09	STEAP4	7	88270892	88306891	-	11245	protein_coding	STEAP4 metalloreductase [Source:HGNC Symbol;Acc:HGNC:21923]	-
ENSG00000115325	65.5425	61.4382	61.2246	157.728	159.481	145.381	62.7351	154.197	-1.29778	5.58756e-10	4.28112e-09	DOK1	2	74549026	74557554	+	3049	protein_coding	docking protein 1 [Source:HGNC Symbol;Acc:HGNC:2990]	-
ENSG00000137843	267.82	276.472	221.939	139.494	106.946	118.787	255.41	121.742	1.06893	5.81944e-10	4.45385e-09	PAK6	15	40238759	40277487	+	6457	protein_coding	p21 (RAC1) activated kinase 6 [Source:HGNC Symbol;Acc:HGNC:16061]	-
ENSG00000138621	113.004	107.517	112.609	276.252	225.15	210.98	111.044	237.461	-1.0969	6.06536e-10	4.63694e-09	PPCDC	15	75023555	75117462	+	3781	protein_coding	phosphopantothenoylcysteine decarboxylase [Source:HGNC Symbol;Acc:HGNC:28107]	-
ENSG00000111218	39.5515	28.6711	42.6385	0	0	0	36.9537	0	7.78191	6.12954e-10	4.68429e-09	PRMT8	12	3381349	3593973	+	6644	protein_coding	protein arginine methyltransferase 8 [Source:HGNC Symbol;Acc:HGNC:5188]	-
ENSG00000150756	68.9326	57.3423	74.3441	161.375	169.801	156.019	66.873	162.398	-1.28201	6.31321e-10	4.81579e-09	FAM173B	5	10226330	10249897	-	2462	protein_coding	family with sequence similarity 173 member B [Source:HGNC Symbol;Acc:HGNC:27029]	-
ENSG00000151364	59.8923	30.7191	55.7581	148.611	150.1	128.538	48.7898	142.417	-1.5515	6.34201e-10	4.83599e-09	KCTD14	11	78015715	78046191	-	1917	protein_coding	potassium channel tetramerization domain containing 14 [Source:HGNC Symbol;Acc:HGNC:23295]	-
ENSG00000276430	39.5515	39.9348	39.3586	2.73517	2.81438	3.54589	39.615	3.03181	3.70537	6.64724e-10	5.06316e-09	FAM25C	10	47995355	47999791	-	319	protein_coding	family with sequence similarity 25 member C [Source:HGNC Symbol;Acc:HGNC:23586]	-
ENSG00000079931	29.3811	12.2876	22.9592	79.32	84.4313	99.2849	21.5427	87.6787	-2.03538	6.86371e-10	5.22421e-09	MOXD1	6	132296055	132401545	-	5293	protein_coding	monooxygenase DBH like 1 [Source:HGNC Symbol;Acc:HGNC:21063]	-
ENSG00000123095	161.596	114.685	134.475	39.2041	42.2157	60.2801	136.919	47.2333	1.53183	6.87712e-10	5.2325e-09	BHLHE41	12	26120026	26125127	-	3948	protein_coding	basic helix-loop-helix family member e41 [Source:HGNC Symbol;Acc:HGNC:16617]	bHLH
ENSG00000179178	74.5828	63.4861	54.6648	184.168	165.11	140.063	64.2446	163.114	-1.34507	6.94336e-10	5.28097e-09	TMEM125	1	43269994	43274002	+	2127	protein_coding	transmembrane protein 125 [Source:HGNC Symbol;Acc:HGNC:28275]	-
ENSG00000182782	115.264	124.924	120.263	45.5862	43.1538	42.5507	120.15	43.7636	1.45762	7.28379e-10	5.52573e-09	HCAR2	12	122701293	122703343	-	2051	protein_coding	hydroxycarboxylic acid receptor 2 [Source:HGNC Symbol;Acc:HGNC:24827]	-
ENSG00000161980	133.345	143.356	110.423	257.106	257.985	262.396	129.041	259.162	-1.00494	8.0885e-10	6.11612e-09	POLR3K	16	46407	53628	-	1889	protein_coding	RNA polymerase III subunit K [Source:HGNC Symbol;Acc:HGNC:14121]	-
ENSG00000044459	82.4931	67.582	120.263	204.226	209.202	236.688	90.1125	216.705	-1.26845	8.20451e-10	6.20158e-09	CNTLN	9	17134982	17503923	+	11064	protein_coding	centlein [Source:HGNC Symbol;Acc:HGNC:23432]	-
ENSG00000130055	44.0717	46.0786	66.691	7.2938	7.50501	8.86472	52.2804	7.88784	2.72689	8.73927e-10	6.5962e-09	GDPD2	X	70423031	70433390	+	2638	protein_coding	glycerophosphodiester phosphodiesterase domain containing 2 [Source:HGNC Symbol;Acc:HGNC:25974]	-
ENSG00000127311	76.8429	67.582	56.8514	144.964	185.749	167.543	67.0921	166.085	-1.30829	8.90178e-10	6.71641e-09	HELB	12	66302545	66347645	+	13796	protein_coding	DNA helicase B [Source:HGNC Symbol;Acc:HGNC:17196]	-
ENSG00000116771	13.5605	28.6711	19.6793	95.7311	86.3076	72.6907	20.637	84.9098	-2.03109	8.97796e-10	6.77144e-09	AGMAT	1	15572353	15585110	-	2500	protein_coding	agmatinase [Source:HGNC Symbol;Acc:HGNC:18407]	-
ENSG00000183578	71.1927	55.2944	52.4782	6.38207	14.0719	11.5241	59.6551	10.6594	2.48522	9.03378e-10	6.80859e-09	TNFAIP8L3	15	51056598	51105276	-	2371	protein_coding	TNF alpha induced protein 8 like 3 [Source:HGNC Symbol;Acc:HGNC:20620]	-
ENSG00000231389	31.6412	29.6951	32.7989	103.025	87.2457	113.468	31.3784	101.246	-1.6917	9.46413e-10	7.12113e-09	HLA-DPA1	6	33064569	33080775	-	5748	protein_coding	major histocompatibility complex, class II, DP alpha 1 [Source:HGNC Symbol;Acc:HGNC:4938]	-
ENSG00000232098	296.071	204.794	266.764	127.641	121.018	109.923	255.876	119.527	1.09677	9.55693e-10	7.18724e-09	AC012313.1	19	58404238	58408484	-	3417	lincRNA	novel transcript	-
ENSG00000169684	13.5605	30.7191	14.2128	76.5848	105.07	77.1231	19.4975	86.2593	-2.13325	1.01286e-09	7.6034e-09	CHRNA5	15	78565520	78595269	+	3623	protein_coding	cholinergic receptor nicotinic alpha 5 subunit [Source:HGNC Symbol;Acc:HGNC:1959]	-
ENSG00000158163	24.8609	18.4315	16.3994	86.6138	68.4832	84.2148	19.8973	79.7706	-2.00728	1.0213e-09	7.6612e-09	DZIP1L	3	138061990	138115818	-	5045	protein_coding	DAZ interacting zinc finger protein 1 like [Source:HGNC Symbol;Acc:HGNC:26551]	-
ENSG00000137819	138.995	131.068	104.956	35.5573	53.4732	40.7777	125.007	43.2694	1.53216	1.05021e-09	7.86955e-09	PAQR5	15	69298947	69407780	+	6224	protein_coding	progestin and adipoQ receptor family member 5 [Source:HGNC Symbol;Acc:HGNC:29645]	-
ENSG00000214856	153.686	143.356	131.195	51.0566	35.6488	66.4854	142.746	51.0636	1.47978	1.10562e-09	8.27582e-09	KRT16P1	17	18432051	18442895	+	2373	transcribed_unprocessed_pseudogene	keratin 16 pseudogene 1 [Source:HGNC Symbol;Acc:HGNC:6420]	-
ENSG00000184564	67.8026	45.0547	66.691	13.6759	8.44313	10.6377	59.8494	10.9189	2.45085	1.10801e-09	8.29074e-09	SLITRK6	13	85792787	85806683	-	4474	protein_coding	SLIT and NTRK like family member 6 [Source:HGNC Symbol;Acc:HGNC:23503]	-
ENSG00000232442	129.955	156.667	125.729	49.2331	53.4732	56.7342	137.45	53.1468	1.3718	1.19394e-09	8.89523e-09	MHENCR	20	63627227	63628824	+	801	antisense	melanoma highly expressed competing endogenous lncRNA for miR-425 and miR-489 [Source:HGNC Symbol;Acc:HGNC:53110]	-
ENSG00000165507	102.834	78.8456	83.0905	24.6166	29.0819	22.1618	88.2567	25.2868	1.80369	1.24239e-09	9.23635e-09	DEPP1	10	44970981	44978810	-	2979	protein_coding	DEPP1, autophagy regulator [Source:HGNC Symbol;Acc:HGNC:23355]	-
ENSG00000168447	54.242	22.5273	47.0117	3.6469	1.87625	1.77294	41.2604	2.43203	4.08161	1.24286e-09	9.23654e-09	SCNN1B	16	23278231	23381299	+	3918	protein_coding	sodium channel epithelial 1 beta subunit [Source:HGNC Symbol;Acc:HGNC:10600]	-
ENSG00000132718	109.614	78.8456	133.382	221.549	239.222	261.509	107.281	240.76	-1.16933	1.25239e-09	9.30401e-09	SYT11	1	155859509	155885199	+	5240	protein_coding	synaptotagmin 11 [Source:HGNC Symbol;Acc:HGNC:19239]	-
ENSG00000260001	143.515	171.003	129.009	70.2028	49.7207	48.756	147.842	56.2265	1.39595	1.65969e-09	1.21904e-08	TGFBR3L	19	7916145	7919097	+	1516	protein_coding	transforming growth factor beta receptor 3 like [Source:HGNC Symbol;Acc:HGNC:44152]	-
ENSG00000198885	70.0626	52.2224	48.105	144.964	157.605	135.63	56.7967	146.067	-1.36508	1.66918e-09	1.22558e-08	ITPRIPL1	2	96325331	96330517	+	4652	protein_coding	ITPRIP like 1 [Source:HGNC Symbol;Acc:HGNC:29371]	-
ENSG00000196154	127.695	164.859	116.983	47.4097	48.7825	56.7342	136.512	50.9755	1.42201	1.69839e-09	1.24571e-08	S100A4	1	153543613	153550136	-	1025	protein_coding	S100 calcium binding protein A4 [Source:HGNC Symbol;Acc:HGNC:10494]	-
ENSG00000167186	123.175	131.068	104.956	244.342	232.655	245.553	119.733	240.85	-1.00748	1.70768e-09	1.25208e-08	COQ7	16	19067599	19080095	+	4120	protein_coding	coenzyme Q7, hydroxylase [Source:HGNC Symbol;Acc:HGNC:2244]	-
ENSG00000152910	48.5918	33.791	47.0117	3.6469	5.62876	5.31883	43.1315	4.86483	3.14696	1.71748e-09	1.25882e-08	CNTNAP4	16	76277278	76559238	+	6482	protein_coding	contactin associated protein like 4 [Source:HGNC Symbol;Acc:HGNC:18747]	-
ENSG00000139988	42.9416	34.815	34.9855	2.73517	0.938126	0.886472	37.5807	1.51992	4.62738	1.73292e-09	1.26924e-08	RDH12	14	67701886	67734452	+	2356	protein_coding	retinol dehydrogenase 12 [Source:HGNC Symbol;Acc:HGNC:19977]	-
ENSG00000123358	50.8519	32.767	55.7581	139.494	123.833	126.765	46.459	130.031	-1.48969	1.83073e-09	1.33852e-08	NR4A1	12	52022832	52059507	+	7295	protein_coding	nuclear receptor subfamily 4 group A member 1 [Source:HGNC Symbol;Acc:HGNC:7980]	NGFIB-like
ENSG00000198092	44.0717	61.4382	29.519	0	2.81438	0	45.0096	0.938126	5.62313	1.84191e-09	1.34622e-08	TMPRSS11F	4	68053198	68129880	-	2088	protein_coding	transmembrane serine protease 11F [Source:HGNC Symbol;Acc:HGNC:29994]	-
ENSG00000183647	37.2914	54.2704	38.2654	113.054	121.018	134.744	43.2757	122.939	-1.50192	2.03173e-09	1.48183e-08	ZNF530	19	57599885	57612722	+	5019	protein_coding	zinc finger protein 530 [Source:HGNC Symbol;Acc:HGNC:29297]	zf-C2H2
ENSG00000231672	100.574	89.0853	96.21	34.6455	30.02	14.1836	95.2897	26.283	1.86111	2.05765e-09	1.4981e-08	DIRC3	2	217284019	217756593	-	4665	lincRNA	disrupted in renal carcinoma 3 [Source:HGNC Symbol;Acc:HGNC:17805]	-
ENSG00000171823	123.175	110.589	137.755	256.195	262.675	226.937	123.84	248.602	-1.00621	2.0699e-09	1.5065e-08	FBXL14	12	1565993	1594165	-	2287	protein_coding	F-box and leucine rich repeat protein 14 [Source:HGNC Symbol;Acc:HGNC:28624]	-
ENSG00000102032	45.2017	66.558	22.9592	3.6469	3.7525	4.43236	44.9063	3.94392	3.51015	2.11115e-09	1.53491e-08	RENBP	X	153935263	153944691	-	2057	protein_coding	renin binding protein [Source:HGNC Symbol;Acc:HGNC:9959]	-
ENSG00000182261	141.255	122.876	133.382	37.3807	64.7307	35.4589	132.505	45.8568	1.53345	2.16184e-09	1.56956e-08	NLRP10	11	7959424	7965426	-	2531	protein_coding	NLR family pyrin domain containing 10 [Source:HGNC Symbol;Acc:HGNC:21464]	-
ENSG00000125726	3.39013	3.07191	3.27989	40.1159	53.4732	32.7995	3.24731	42.1295	-3.69817	2.42957e-09	1.7578e-08	CD70	19	6583183	6604103	-	1532	protein_coding	CD70 molecule [Source:HGNC Symbol;Acc:HGNC:11937]	-
ENSG00000183760	322.062	206.842	287.537	136.759	121.018	125.879	272.147	127.885	1.08754	2.5177e-09	1.8184e-08	ACP7	19	39083913	39111493	+	3107	protein_coding	acid phosphatase 7, tartrate resistant (putative) [Source:HGNC Symbol;Acc:HGNC:33781]	-
ENSG00000132763	101.704	76.7977	102.77	212.432	202.635	193.251	93.7571	202.773	-1.11556	2.52092e-09	1.82009e-08	MMACHC	1	45500053	45513382	+	5296	protein_coding	methylmalonic aciduria (cobalamin deficiency) cblC type, with homocystinuria [Source:HGNC Symbol;Acc:HGNC:24525]	-
ENSG00000156042	91.5334	87.0374	63.4112	14.5876	27.2056	20.3889	80.6607	20.7274	1.9625	3.01178e-09	2.16322e-08	CFAP70	10	73253759	73358859	-	7428	protein_coding	cilia and flagella associated protein 70 [Source:HGNC Symbol;Acc:HGNC:30726]	-
ENSG00000175352	51.982	41.9827	74.3441	151.346	148.224	141.836	56.1029	147.135	-1.39369	3.01521e-09	2.16493e-08	NRIP3	11	8980576	9004049	-	4123	protein_coding	nuclear receptor interacting protein 3 [Source:HGNC Symbol;Acc:HGNC:1167]	-
ENSG00000138030	6.78026	16.3835	5.46648	63.8207	55.3494	54.9613	9.54342	58.0438	-2.58818	3.03848e-09	2.18013e-08	KHK	2	27086747	27100772	+	3060	protein_coding	ketohexokinase [Source:HGNC Symbol;Acc:HGNC:6315]	-
ENSG00000183508	67.8026	63.4861	61.2246	13.6759	13.1338	17.7294	64.1711	14.8464	2.10924	3.08882e-09	2.21395e-08	TENT5C	1	117605934	117628372	+	5751	protein_coding	terminal nucleotidyltransferase 5C [Source:HGNC Symbol;Acc:HGNC:24712]	-
ENSG00000204632	94.9236	59.3902	76.5307	14.5876	22.515	20.3889	76.9482	19.1638	2.00391	3.20509e-09	2.29571e-08	HLA-G	6	29826967	29831125	+	1763	protein_coding	major histocompatibility complex, class I, G [Source:HGNC Symbol;Acc:HGNC:4964]	-
ENSG00000138685	97.1837	93.1812	73.2508	193.286	192.316	187.932	87.8719	191.178	-1.12129	3.26536e-09	2.33807e-08	FGF2	4	122826708	122898236	+	6775	protein_coding	fibroblast growth factor 2 [Source:HGNC Symbol;Acc:HGNC:3676]	-
ENSG00000261801	79.103	75.7737	86.3704	186.903	181.058	164.884	80.4157	177.615	-1.1436	3.32049e-09	2.37509e-08	LOXL1-AS1	15	73908071	73928248	-	4221	antisense	LOXL1 antisense RNA 1 [Source:HGNC Symbol;Acc:HGNC:44169]	-
ENSG00000186897	2.26009	3.07191	1.0933	43.7628	30.02	47.8695	2.14176	40.5508	-4.23322	3.32509e-09	2.37757e-08	C1QL4	12	49332411	49337188	-	2071	protein_coding	complement C1q like 4 [Source:HGNC Symbol;Acc:HGNC:31416]	-
ENSG00000180543	221.488	190.458	227.406	103.937	104.132	104.604	213.117	104.224	1.03094	3.6981e-09	2.63793e-08	TSPYL5	8	97273474	97277964	-	4491	protein_coding	TSPY like 5 [Source:HGNC Symbol;Acc:HGNC:29367]	-
ENSG00000173531	206.798	157.691	211.006	95.7311	86.3076	68.2583	191.832	83.4323	1.20074	3.93466e-09	2.79898e-08	MST1	3	49683947	49689501	-	5084	protein_coding	macrophage stimulating 1 [Source:HGNC Symbol;Acc:HGNC:7380]	-
ENSG00000208005	101.704	90.1093	85.2771	33.7338	30.02	23.9347	92.3634	29.2295	1.66061	4.3853e-09	3.11529e-08	MIR503	X	134546328	134546398	-	71	miRNA	microRNA 503 [Source:HGNC Symbol;Acc:HGNC:32138]	-
ENSG00000135643	119.785	151.547	96.21	40.1159	46.9063	43.4371	122.514	43.4864	1.49641	4.4365e-09	3.1495e-08	KCNMB4	12	70366276	70434292	+	4874	protein_coding	potassium calcium-activated channel subfamily M regulatory beta subunit 4 [Source:HGNC Symbol;Acc:HGNC:6289]	-
ENSG00000173727	80.233	115.709	72.1575	26.44	21.5769	28.3671	89.3664	25.4613	1.81211	4.48884e-09	3.18449e-08	AP000769.1	11	65455258	65466720	+	1772	transcribed_unprocessed_pseudogene	Finkel-Biskis-Reilly murine sarcoma virus (FBR-MuSV) ubiquitously expressed (FAU) pseudogene	-
ENSG00000157833	25.991	23.5513	27.3324	79.32	95.6888	83.3284	25.6249	86.1124	-1.74971	4.55971e-09	3.23366e-08	GAREM2	2	26173091	26189663	+	5939	protein_coding	GRB2 associated regulator of MAPK1 subtype 2 [Source:HGNC Symbol;Acc:HGNC:27172]	-
ENSG00000162614	38.4214	50.1745	41.5452	124.906	113.513	115.241	43.3804	117.887	-1.43911	4.6498e-09	3.29642e-08	NEXN	1	77888513	77943895	+	4436	protein_coding	nexilin F-actin binding protein [Source:HGNC Symbol;Acc:HGNC:29557]	-
ENSG00000115526	76.8429	70.6539	75.4374	154.081	189.501	162.224	74.3114	168.602	-1.18238	4.78683e-09	3.38779e-08	CHST10	2	100391860	100417656	-	4487	protein_coding	carbohydrate sulfotransferase 10 [Source:HGNC Symbol;Acc:HGNC:19650]	-
ENSG00000143520	40.6815	37.8869	27.3324	2.73517	1.87625	0.886472	35.3003	1.83263	4.2736	4.92461e-09	3.48175e-08	FLG2	1	152348735	152360006	-	9124	protein_coding	filaggrin family member 2 [Source:HGNC Symbol;Acc:HGNC:33276]	-
ENSG00000204947	122.045	80.8936	109.33	31.9104	36.5869	34.5724	104.089	34.3566	1.5973	5.11145e-09	3.6077e-08	ZNF425	7	149102784	149126346	-	3687	protein_coding	zinc finger protein 425 [Source:HGNC Symbol;Acc:HGNC:20690]	zf-C2H2
ENSG00000143416	48.5918	26.6232	49.1983	120.348	140.719	106.377	41.4711	122.481	-1.56769	5.3864e-09	3.79146e-08	SELENBP1	1	151364302	151372733	-	3504	protein_coding	selenium binding protein 1 [Source:HGNC Symbol;Acc:HGNC:10719]	-
ENSG00000253159	131.085	80.8936	102.77	38.2924	34.7107	26.5942	104.916	33.1991	1.65907	5.57547e-09	3.92189e-08	PCDHGA12	5	141430589	141512979	+	4815	protein_coding	protocadherin gamma subfamily A, 12 [Source:HGNC Symbol;Acc:HGNC:8699]	-
ENSG00000163221	24.8609	36.8629	43.7318	1.82345	1.87625	1.77294	35.1519	1.82421	4.27012	5.92049e-09	4.15334e-08	S100A12	1	153373706	153375649	-	518	protein_coding	S100 calcium binding protein A12 [Source:HGNC Symbol;Acc:HGNC:10489]	-
ENSG00000112773	149.166	186.362	130.102	69.2911	62.8544	61.1666	155.21	64.4373	1.26993	6.42886e-09	4.49479e-08	TENT5A	6	81491439	81752774	-	6053	protein_coding	terminal nucleotidyltransferase 5A [Source:HGNC Symbol;Acc:HGNC:18345]	-
ENSG00000176273	63.2824	91.1333	68.8776	154.993	197.945	171.089	74.4311	174.676	-1.22659	6.47037e-09	4.52229e-08	SLC35G1	10	93893973	93956062	+	6829	protein_coding	solute carrier family 35 member G1 [Source:HGNC Symbol;Acc:HGNC:26607]	-
ENSG00000140839	40.6815	49.1505	39.3586	4.55862	8.44313	4.43236	43.0636	5.81137	2.89673	6.58558e-09	4.59355e-08	CLEC18B	16	74408270	74421953	-	3143	protein_coding	C-type lectin domain family 18 member B [Source:HGNC Symbol;Acc:HGNC:33849]	-
ENSG00000235706	106.224	93.1812	115.889	31.9104	33.7725	43.4371	105.098	36.3733	1.52832	6.62984e-09	4.62287e-08	DICER1-AS1	14	95157645	95179933	+	3722	antisense	DICER1 antisense RNA 1 [Source:HGNC Symbol;Acc:HGNC:43017]	-
ENSG00000114670	158.206	154.619	141.035	44.6745	76.9263	60.2801	151.287	60.627	1.32062	6.81945e-09	4.75189e-08	NEK11	3	131026850	131350465	+	5355	protein_coding	NIMA related kinase 11 [Source:HGNC Symbol;Acc:HGNC:18593]	-
ENSG00000253304	80.233	73.7258	96.21	189.639	167.925	188.819	83.3896	182.127	-1.1286	7.18137e-09	4.99403e-08	TMEM200B	1	29119428	29123935	-	2639	protein_coding	transmembrane protein 200B [Source:HGNC Symbol;Acc:HGNC:33785]	-
ENSG00000204385	10.1704	14.3356	8.74637	55.6152	60.0401	54.0748	11.0841	56.5767	-2.34497	7.42005e-09	5.1514e-08	SLC44A4	6	31863192	31879046	-	3372	protein_coding	solute carrier family 44 member 4 [Source:HGNC Symbol;Acc:HGNC:13941]	-
ENSG00000248099	35.0313	37.8869	48.105	5.47035	5.62876	3.54589	40.3411	4.88166	3.05072	7.67954e-09	5.32088e-08	INSL3	19	17816512	17821574	-	923	protein_coding	insulin like 3 [Source:HGNC Symbol;Acc:HGNC:6086]	-
ENSG00000150627	10.1704	18.4315	13.1195	61.9973	74.1119	55.8477	13.9071	63.9856	-2.19289	7.70796e-09	5.33879e-08	WDR17	4	176065834	176182818	+	7808	protein_coding	WD repeat domain 17 [Source:HGNC Symbol;Acc:HGNC:16661]	-
ENSG00000152527	40.6815	26.6232	40.4519	96.6428	106.946	112.582	35.9189	105.39	-1.55798	7.8954e-09	5.46679e-08	PLEKHH2	2	43637273	43767987	+	9835	protein_coding	pleckstrin homology, MyTH4 and FERM domain containing H2 [Source:HGNC Symbol;Acc:HGNC:30506]	-
ENSG00000174456	178.547	239.609	148.688	89.349	75.0501	77.1231	188.948	80.5074	1.23242	8.42346e-09	5.82272e-08	C12orf76	12	110027028	110073686	-	7052	protein_coding	chromosome 12 open reading frame 76 [Source:HGNC Symbol;Acc:HGNC:33790]	-
ENSG00000050767	48.5918	54.2704	37.1721	10.029	5.62876	6.2053	46.6781	7.28768	2.67951	9.15201e-09	6.29909e-08	COL23A1	5	178237618	178590555	-	3766	protein_coding	collagen type XXIII alpha 1 chain [Source:HGNC Symbol;Acc:HGNC:22990]	-
ENSG00000180596	45.2017	38.9108	39.3586	6.38207	3.7525	6.2053	41.1571	5.44663	2.91295	9.29726e-09	6.39483e-08	HIST1H2BC	6	26114873	26123926	-	834	protein_coding	histone cluster 1 H2B family member c [Source:HGNC Symbol;Acc:HGNC:4757]	-
ENSG00000180385	24.8609	28.6711	31.7056	79.32	83.4932	117.901	28.4126	93.5713	-1.7194	9.83977e-09	6.75011e-08	EMC3-AS1	3	9986893	10006990	+	3714	transcribed_unprocessed_pseudogene	EMC3 antisense RNA 1 [Source:HGNC Symbol;Acc:HGNC:49223]	-
ENSG00000135205	163.856	162.811	188.047	76.5848	87.2457	72.6907	171.571	78.8404	1.12255	1.02087e-08	6.99166e-08	CCDC146	7	77122434	77329533	+	4457	protein_coding	coiled-coil domain containing 146 [Source:HGNC Symbol;Acc:HGNC:29296]	-
ENSG00000197635	74.5828	91.1333	85.2771	15.4993	15.9481	34.5724	83.6644	22.0066	1.9226	1.07324e-08	7.32378e-08	DPP4	2	161992241	162074542	-	5009	protein_coding	dipeptidyl peptidase 4 [Source:HGNC Symbol;Acc:HGNC:3009]	-
ENSG00000213949	74.5828	61.4382	69.9709	137.67	166.986	169.316	68.664	157.991	-1.20425	1.1097e-08	7.5626e-08	ITGA1	5	52787896	52959210	+	18566	protein_coding	integrin subunit alpha 1 [Source:HGNC Symbol;Acc:HGNC:6134]	-
ENSG00000171889	129.955	137.212	111.516	53.7917	54.4113	38.1183	126.228	48.7738	1.37419	1.12749e-08	7.67632e-08	MIR31HG	9	21455642	21559669	-	745	sense_overlapping	MIR31 host gene [Source:HGNC Symbol;Acc:HGNC:37187]	-
ENSG00000155980	12.4305	28.6711	9.83966	73.8497	71.2976	78.0095	16.9804	74.3856	-2.11827	1.13779e-08	7.73882e-08	KIF5A	12	57549998	57586632	+	6261	protein_coding	kinesin family member 5A [Source:HGNC Symbol;Acc:HGNC:6323]	-
ENSG00000189182	47.4618	38.9108	47.0117	0	0.938126	0	44.4614	0.312709	7.0875	1.14285e-08	7.7707e-08	KRT77	12	52689626	52703463	-	3952	protein_coding	keratin 77 [Source:HGNC Symbol;Acc:HGNC:20411]	-
ENSG00000188015	64.4124	72.7018	85.2771	183.257	156.667	160.451	74.1304	166.792	-1.16936	1.14606e-08	7.79001e-08	S100A3	1	153547329	153549372	-	955	protein_coding	S100 calcium binding protein A3 [Source:HGNC Symbol;Acc:HGNC:10493]	-
ENSG00000183742	186.457	246.777	193.513	88.4373	110.699	98.3984	208.916	99.1782	1.077	1.22766e-08	8.32557e-08	MACC1	7	20134655	20217404	-	9898	protein_coding	MACC1, MET transcriptional regulator [Source:HGNC Symbol;Acc:HGNC:30215]	-
ENSG00000197020	32.7712	52.2224	53.5715	105.76	151.976	127.652	46.1884	128.463	-1.47166	1.23464e-08	8.37016e-08	ZNF100	19	21722766	21767628	-	6612	protein_coding	zinc finger protein 100 [Source:HGNC Symbol;Acc:HGNC:12880]	zf-C2H2
ENSG00000115919	195.497	162.811	173.834	81.1435	85.3695	84.2148	177.381	83.5759	1.08468	1.25044e-08	8.46624e-08	KYNU	2	142877498	143055832	+	17600	protein_coding	kynureninase [Source:HGNC Symbol;Acc:HGNC:6469]	-
ENSG00000245060	134.475	112.637	122.449	45.5862	50.6588	51.4154	123.187	49.2201	1.32237	1.26416e-08	8.55355e-08	LINC00847	5	180830957	180835726	+	2453	lincRNA	long intergenic non-protein coding RNA 847 [Source:HGNC Symbol;Acc:HGNC:45050]	-
ENSG00000102362	3.39013	10.2397	2.18659	38.2924	40.3394	59.3936	5.27214	46.0085	-3.10309	1.31531e-08	8.87941e-08	SYTL4	X	100674491	100732123	-	7428	protein_coding	synaptotagmin like 4 [Source:HGNC Symbol;Acc:HGNC:15588]	-
ENSG00000079257	42.9416	34.815	30.6123	94.8193	116.328	100.171	36.123	103.773	-1.52397	1.35502e-08	9.13858e-08	LXN	3	158645822	158672693	-	1504	protein_coding	latexin [Source:HGNC Symbol;Acc:HGNC:13347]	-
ENSG00000167604	49.7219	53.2464	49.1983	136.759	122.894	118.787	50.7222	126.147	-1.31344	1.38451e-08	9.3284e-08	NFKBID	19	35887653	35902303	-	3198	protein_coding	NFKB inhibitor delta [Source:HGNC Symbol;Acc:HGNC:15671]	-
ENSG00000104324	94.9236	107.517	94.0234	43.7628	29.0819	24.8212	98.8213	32.5553	1.60342	1.39733e-08	9.40867e-08	CPQ	8	96645227	97149654	+	3457	protein_coding	carboxypeptidase Q [Source:HGNC Symbol;Acc:HGNC:16910]	-
ENSG00000184635	30.5111	26.6232	34.9855	79.32	99.4413	103.717	30.7066	94.1595	-1.61869	1.47909e-08	9.93666e-08	ZNF93	19	19900913	19963464	+	5579	protein_coding	zinc finger protein 93 [Source:HGNC Symbol;Acc:HGNC:13169]	zf-C2H2
ENSG00000003096	73.4528	73.7258	74.3441	177.786	141.657	173.748	73.8409	164.397	-1.15526	1.57201e-08	1.05337e-07	KLHL13	X	117897813	118117340	-	6983	protein_coding	kelch like family member 13 [Source:HGNC Symbol;Acc:HGNC:22931]	-
ENSG00000184988	13.5605	16.3835	15.3061	63.8207	56.2876	69.1448	15.0834	63.0844	-2.06243	1.57861e-08	1.05745e-07	TMEM106A	17	43211835	43220041	+	3577	protein_coding	transmembrane protein 106A [Source:HGNC Symbol;Acc:HGNC:28288]	-
ENSG00000102796	89.2734	112.637	100.583	36.469	41.2775	25.7077	100.831	34.4847	1.55179	1.63101e-08	1.09114e-07	DHRS12	13	51767993	51804157	-	3525	protein_coding	dehydrogenase/reductase 12 [Source:HGNC Symbol;Acc:HGNC:25832]	-
ENSG00000183814	93.7935	98.3011	113.703	184.168	227.026	214.526	101.932	208.574	-1.03271	1.68277e-08	1.12504e-07	LIN9	1	226231149	226309869	-	4442	protein_coding	lin-9 DREAM MuvB core complex component [Source:HGNC Symbol;Acc:HGNC:30830]	-
ENSG00000123080	5.65021	0	13.1195	46.4979	47.8444	56.7342	6.25659	50.3589	-3.02766	1.73825e-08	1.16101e-07	CDKN2C	1	50960745	50974633	+	3318	protein_coding	cyclin dependent kinase inhibitor 2C [Source:HGNC Symbol;Acc:HGNC:1789]	-
ENSG00000105948	82.4931	116.733	106.05	239.784	200.759	198.57	101.758	213.037	-1.06313	1.75756e-08	1.17353e-07	TTC26	7	139133744	139191986	+	4999	protein_coding	tetratricopeptide repeat domain 26 [Source:HGNC Symbol;Acc:HGNC:21882]	-
ENSG00000025039	67.8026	60.4142	42.6385	10.9407	14.0719	11.5241	56.9518	12.1789	2.22661	1.77047e-08	1.18177e-07	RRAGD	6	89364636	89412270	-	5072	protein_coding	Ras related GTP binding D [Source:HGNC Symbol;Acc:HGNC:19903]	-
ENSG00000004777	33.9013	23.5513	25.1458	97.5545	87.2457	78.0095	27.5328	87.6032	-1.67368	1.91759e-08	1.27669e-07	ARHGAP33	19	35774532	35788822	+	5260	protein_coding	Rho GTPase activating protein 33 [Source:HGNC Symbol;Acc:HGNC:23085]	-
ENSG00000137877	138.995	122.876	86.3704	38.2924	43.1538	44.3236	116.081	41.9233	1.46886	1.93159e-08	1.2856e-07	SPTBN5	15	41848144	41894077	-	12338	protein_coding	spectrin beta, non-erythrocytic 5 [Source:HGNC Symbol;Acc:HGNC:15680]	-
ENSG00000269893	1712.01	2586.55	1504.38	781.348	708.285	669.286	1934.31	719.64	1.42664	2.07942e-08	1.38046e-07	SNHG8	4	118278709	118279823	+	923	lincRNA	small nucleolar RNA host gene 8 [Source:HGNC Symbol;Acc:HGNC:33098]	-
ENSG00000167971	32.7712	49.1505	48.105	3.6469	8.44313	7.09178	43.3423	6.39394	2.76449	2.23911e-08	1.48221e-07	CASKIN1	16	2177180	2196525	-	5889	protein_coding	CASK interacting protein 1 [Source:HGNC Symbol;Acc:HGNC:20879]	-
ENSG00000115604	23.7309	8.19176	17.4927	58.3504	75.0501	76.2366	16.4718	69.879	-2.09677	2.24023e-08	1.48247e-07	IL18R1	2	102311529	102398775	+	4353	protein_coding	interleukin 18 receptor 1 [Source:HGNC Symbol;Acc:HGNC:5988]	-
ENSG00000254614	84.7532	90.1093	67.7843	28.2635	26.2675	18.6159	80.8823	24.3823	1.7326	2.30273e-08	1.52141e-07	AP003068.2	11	65177606	65181834	-	1791	antisense	uncharacterized LOC728975 [Source:NCBI gene;Acc:728975]	-
ENSG00000180316	38.4214	39.9348	48.105	0	0.938126	0.886472	42.1538	0.608199	6.11595	2.39127e-08	1.57591e-07	PNPLA1	6	36243203	36312229	+	3034	protein_coding	patatin like phospholipase domain containing 1 [Source:HGNC Symbol;Acc:HGNC:21246]	-
ENSG00000118894	116.394	98.3011	94.0234	244.342	179.182	217.186	102.906	213.57	-1.05512	2.40715e-08	1.58536e-07	EEF2KMT	16	5084304	5097808	-	3128	protein_coding	eukaryotic elongation factor 2 lysine methyltransferase [Source:HGNC Symbol;Acc:HGNC:32221]	-
ENSG00000166002	20.3408	17.4075	15.3061	58.3504	74.1119	70.9178	17.6848	67.7934	-1.94008	2.44097e-08	1.60611e-07	SMCO4	11	93478472	93543508	-	1223	protein_coding	single-pass membrane protein with coiled-coil domains 4 [Source:HGNC Symbol;Acc:HGNC:24810]	-
ENSG00000197275	27.121	16.3835	19.6793	58.3504	82.5551	93.966	21.0613	78.2905	-1.90036	2.49181e-08	1.638e-07	RAD54B	8	94371960	94475109	-	5313	protein_coding	RAD54 homolog B [Source:HGNC Symbol;Acc:HGNC:17228]	-
ENSG00000137101	64.4124	50.1745	55.7581	12.7641	15.01	11.5241	56.7817	13.0994	2.11647	2.55377e-08	1.67714e-07	CD72	9	35609533	35646810	-	3386	protein_coding	CD72 molecule [Source:HGNC Symbol;Acc:HGNC:1696]	-
ENSG00000219507	87.0133	89.0853	76.5307	30.0869	25.3294	27.4806	84.2098	27.6323	1.60745	2.60894e-08	1.71121e-07	FTH1P8	X	148052233	148052746	+	514	processed_pseudogene	ferritin heavy chain 1 pseudogene 8 [Source:HGNC Symbol;Acc:HGNC:3995]	-
ENSG00000134259	11.3004	13.3116	7.65307	53.7917	48.7825	57.6207	10.755	53.3983	-2.3082	2.79795e-08	1.83114e-07	NGF	1	115285918	115338236	-	1047	protein_coding	nerve growth factor [Source:HGNC Symbol;Acc:HGNC:7808]	-
ENSG00000188373	36.1614	37.8869	43.7318	0	0	0.886472	39.26	0.295491	6.90902	3.19311e-08	2.08253e-07	C10orf99	10	84173738	84185294	+	888	protein_coding	chromosome 10 open reading frame 99 [Source:HGNC Symbol;Acc:HGNC:31428]	-
ENSG00000226887	44.0717	52.2224	51.3849	117.612	112.575	138.29	49.2263	122.826	-1.31811	3.19648e-08	2.08408e-07	ERVMER34-1	4	52722618	52751640	-	4077	protein_coding	endogenous retrovirus group MER34 member 1, envelope [Source:HGNC Symbol;Acc:HGNC:42970]	-
ENSG00000125454	88.1433	104.445	95.1167	227.019	173.553	195.024	95.9016	198.532	-1.04848	3.23635e-08	2.10941e-07	SLC25A19	17	75272981	75289510	-	3316	protein_coding	solute carrier family 25 member 19 [Source:HGNC Symbol;Acc:HGNC:14409]	-
ENSG00000239900	28.2511	31.7431	34.9855	101.201	87.2457	88.6472	31.6599	92.3648	-1.54384	3.23977e-08	2.11098e-07	ADSL	22	40346500	40390463	+	7111	protein_coding	adenylosuccinate lyase [Source:HGNC Symbol;Acc:HGNC:291]	-
ENSG00000160145	38.4214	43.0067	38.2654	2.73517	8.44313	5.31883	39.8978	5.49905	2.86463	3.29791e-08	2.14684e-07	KALRN	3	124080023	124726325	+	24490	protein_coding	kalirin RhoGEF kinase [Source:HGNC Symbol;Acc:HGNC:4814]	-
ENSG00000131944	29.3811	22.5273	24.0525	88.4373	70.3594	85.9878	25.3203	81.5948	-1.69184	3.42588e-08	2.22805e-07	FAAP24	19	32972209	32978222	+	2370	protein_coding	FA core complex associated protein 24 [Source:HGNC Symbol;Acc:HGNC:28467]	-
ENSG00000168703	28.2511	27.6472	16.3994	0	0	0	24.0992	0	7.16704	3.52059e-08	2.28607e-07	WFDC12	20	45123425	45124465	-	775	protein_coding	WAP four-disulfide core domain 12 [Source:HGNC Symbol;Acc:HGNC:16115]	-
ENSG00000197191	51.982	52.2224	57.9447	11.8524	13.1338	12.4106	54.0497	12.4656	2.11666	3.75303e-08	2.43017e-07	CYSRT1	9	137224635	137226311	+	1297	protein_coding	cysteine rich tail 1 [Source:HGNC Symbol;Acc:HGNC:30529]	-
ENSG00000064886	38.4214	47.1026	41.5452	5.47035	4.69063	9.75119	42.3564	6.63739	2.66872	3.75904e-08	2.4333e-07	CHI3L2	1	111200771	111243440	+	3295	protein_coding	chitinase 3 like 2 [Source:HGNC Symbol;Acc:HGNC:1933]	-
ENSG00000092529	57.6322	59.3902	68.8776	13.6759	16.8863	17.7294	61.9667	16.0972	1.94428	3.78109e-08	2.44682e-07	CAPN3	15	42359500	42412318	+	4995	protein_coding	calpain 3 [Source:HGNC Symbol;Acc:HGNC:1480]	-
ENSG00000100058	89.2734	75.7737	88.557	178.698	170.739	175.521	84.5347	174.986	-1.05148	3.80777e-08	2.46331e-07	CRYBB2P1	22	25448105	25520854	+	6435	transcribed_unprocessed_pseudogene	crystallin beta B2 pseudogene 1 [Source:HGNC Symbol;Acc:HGNC:2399]	-
ENSG00000223784	22.6009	29.6951	19.6793	80.2317	72.2357	85.1013	23.9918	79.1896	-1.71892	3.96114e-08	2.55696e-07	LINP1	10	6709530	6740532	+	4118	lincRNA	lncRNA in non-homologous end joining pathway 1 [Source:HGNC Symbol;Acc:HGNC:53170]	-
ENSG00000136052	53.112	53.2464	54.6648	117.612	121.956	148.041	53.6744	129.203	-1.26798	4.16132e-08	2.67869e-07	SLC41A2	12	104802553	104958744	-	5151	protein_coding	solute carrier family 41 member 2 [Source:HGNC Symbol;Acc:HGNC:31045]	-
ENSG00000164684	65.5425	68.606	69.9709	16.411	22.515	19.5024	68.0398	19.4761	1.80595	4.32841e-08	2.78108e-07	ZNF704	8	80628451	80874781	-	15008	protein_coding	zinc finger protein 704 [Source:HGNC Symbol;Acc:HGNC:32291]	-
ENSG00000186844	32.7712	19.4554	18.586	0	0	0	23.6042	0	7.13459	4.45597e-08	2.85862e-07	LCE1A	1	152827473	152827894	+	422	protein_coding	late cornified envelope 1A [Source:HGNC Symbol;Acc:HGNC:29459]	-
ENSG00000172456	178.547	164.859	142.128	76.5848	73.1738	77.1231	161.845	75.6272	1.09709	4.52584e-08	2.90165e-07	FGGY	1	59296638	59810647	+	12174	protein_coding	FGGY carbohydrate kinase domain containing [Source:HGNC Symbol;Acc:HGNC:25610]	-
ENSG00000260231	85.8832	107.517	97.3033	37.3807	25.3294	39.0048	96.9011	33.905	1.51391	4.55437e-08	2.91904e-07	KDM7A-DT	7	140177184	140179640	+	2457	bidirectional_promoter_lncRNA	KDM7A divergent transcript [Source:HGNC Symbol;Acc:HGNC:48959]	-
ENSG00000261068	75.7129	29.6951	51.3849	5.47035	7.50501	12.4106	52.2643	8.46199	2.61922	4.73365e-08	3.02927e-07	AL512274.1	6	42092233	42094259	-	2027	lincRNA	novel transcript	-
ENSG00000087301	49.7219	39.9348	53.5715	114.877	119.142	120.56	47.7427	118.193	-1.31051	5.01516e-08	3.20153e-07	TXNDC16	14	52430590	52552522	-	4739	protein_coding	thioredoxin domain containing 16 [Source:HGNC Symbol;Acc:HGNC:19965]	-
ENSG00000168477	110.744	114.685	106.05	31.9104	53.4732	39.8912	110.493	41.7583	1.40589	5.11015e-08	3.26017e-07	TNXB	6	32041153	32115334	-	15909	protein_coding	tenascin XB [Source:HGNC Symbol;Acc:HGNC:11976]	-
ENSG00000266904	71.1927	77.8217	65.5977	21.8814	19.7006	23.0483	71.5374	21.5434	1.73113	5.12541e-08	3.2679e-07	LINC00663	19	19757366	19776423	-	4334	lincRNA	long intergenic non-protein coding RNA 663 [Source:HGNC Symbol;Acc:HGNC:28609]	-
ENSG00000271380	49.7219	44.0307	36.0788	9.11724	8.44313	3.54589	43.2771	7.03542	2.62608	5.35321e-08	3.40792e-07	AL451085.2	1	154961825	154962623	+	799	antisense	uncharacterized LOC101928120 [Source:NCBI gene;Acc:101928120]	-
[truncated: 1,238 more rows]
